# Supplementary material for: Pan-cancer association of DNA repair deficiencies with whole-genome mutational patterns
Source: eLife. 2023 Mar 8;12:e81224. doi: 10.7554/eLife.81224 (PMC10115443; doi:10.7554/eLife.81224)
Supplement: Supplementary file 1. — (a) All included tumours and their primary tumour locations. (b) 736 DNA damage response (DDR) genes, hg19 coordinates, and the number of pathogenic events across 6065 cancer genomes. (c) All single-base substitution (SBS) signature contributions, indels counts, and structural variant (SV) counts, per sample. (d) All SBS signature contributions, indels counts, and SV counts, per sample, log-transformed and scaled to z-scores. (e) Proposed aetiologies of base substitution signatures. (f) All models (n = 535). (g) Pathogenic events in each of the 535 loss-of-function (LOF)-sets. (h) Shortlisted models (n = 48). (i) Correlation between features in shortlisted models. (j) Survival analysis for the shortlisted models. [file elife-81224-supp1.xlsx]

## Sheet: TOC
TOC
a	All included samples and their primary tumor locations
b	736 DDR genes, hg19 coordinates and the number of pathogenic events across 6,065 cancer genomes
c	All SBS signatures, indels counts and SV counts, per sample
d	All SBS signatures, indels counts and SV counts, per sample, log-transformed and scaled to z-scores
e	Proposed Etiologies of base substitution signatures
f	All models (n=535)
g	Pathogenic events in each of the 535 LOF-sets
h	shortlisted models (n=48)
i	Correlation between features in shortlisted models (one row per feature in each of the shortlisted models)
j	Survival analysis of shortlisted models

## Sheet: a
ID of the donor, and the sample from the donor, as well as the site of the primary tumour.
Donor_ID	Sample_ID	Primary tumor location
HMF002764	HMF002764A	Breast
HMF003787	HMF003787A	Lung
HMF001423	HMF001423C	Breast
HMF000332	HMF000332A	Prostate
HMF002377	HMF002377A	Bone/Soft tissue
HMF000256	HMF000256A	Bone/Soft tissue
HMF001013	HMF001013A	Skin
HMF002729	HMF002729A	Liver
HMF002238	HMF002238A	Lung
HMF000963	HMF000963B	Biliary
HMF001024	HMF001024A	Prostate
HMF001829	HMF001829A	Bone/Soft tissue
HMF000299	HMF000299B	Skin
HMF002027	HMF002027A	Colorectal
HMF002185	HMF002185A	Bone/Soft tissue
HMF001885	HMF001885A	Prostate
HMF003422	HMF003422A	Breast
HMF003439	HMF003439A	Lung
HMF003068	HMF003068A	Bone/Soft tissue
HMF000059	HMF000059A	Lung
HMF001965	HMF001965A	Colorectal
HMF001250	HMF001250A	Prostate
HMF001916	HMF001916C	Breast
HMF002324	HMF002324A	Breast
HMF002210	HMF002210A	Bone/Soft tissue
HMF003684	HMF003684A	Breast
HMF001401	HMF001401A	Breast
HMF001390	HMF001390A	Breast
HMF000880	HMF000880A	Skin
HMF000639	HMF000639A	Skin
HMF001635	HMF001635B	Unknown
HMF002735	HMF002735A	Breast
HMF000854	HMF000854A	Lung
HMF003769	HMF003769A	Lung
HMF000066	HMF000066A	Lung
HMF002394	HMF002394A	Kidney
HMF000987	HMF000987A	Breast
HMF003586	HMF003586A	Breast
HMF003112	HMF003112A	Skin
HMF000957	HMF000957A	Colorectal
HMF002994	HMF002994A	Colorectal
HMF002816	HMF002816A	Lung
HMF001288	HMF001288B	Lung
HMF002800	HMF002800A	Colorectal
HMF003080	HMF003080A	Lung
HMF002273	HMF002273A	Colorectal
HMF001185	HMF001185A	NET
HMF000882	HMF000882A	Colorectal
HMF002740	HMF002740A	Skin
HMF002742	HMF002742A	Bone/Soft tissue
HMF003298	HMF003298A	Colorectal
HMF003132	HMF003132B	Lung
HMF003897	HMF003897A	Lung
HMF001114	HMF001114A	Skin
HMF001272	HMF001272A	Skin
HMF001774	HMF001774A	Breast
HMF000750	HMF000750A	Skin
HMF001060	HMF001060A	Colorectal
HMF002855	HMF002855A	Lung
HMF000273	HMF000273A	Breast
HMF000272	HMF000272A	Colorectal
HMF000922	HMF000922A	Breast
HMF002560	HMF002560A	Breast
HMF002270	HMF002270A	Breast
HMF001784	HMF001784A	Lung
HMF002107	HMF002107B	Colorectal
HMF000769	HMF000769A	Breast
HMF003717	HMF003717A	Colorectal
HMF002781	HMF002781A	Lung
HMF000161	HMF000161A	Lung
HMF000539	HMF000539A	Skin
HMF002369	HMF002369A	Colorectal
HMF000710	HMF000710A	Breast
HMF000347	HMF000347A	Lung
HMF002094	HMF002094A	Prostate
HMF002302	HMF002302A	Colorectal
HMF001840	HMF001840A	Colorectal
HMF001838	HMF001838A	Colorectal
HMF000647	HMF000647A	Bone/Soft tissue
HMF000405	HMF000405A	Bone/Soft tissue
HMF002503	HMF002503A	Skin
HMF002358	HMF002358A	Breast
HMF001585	HMF001585A	Breast
HMF001367	HMF001367A	Skin
HMF001021	HMF001021A	NET
HMF002879	HMF002879A	Skin
HMF000732	HMF000732A	Esophagus
HMF001282	HMF001282A	NET
HMF002627	HMF002627A	Colorectal
HMF001815	HMF001815A	NET
HMF001704	HMF001704A	Colorectal
HMF000609	HMF000609A	Prostate
HMF000814	HMF000814A	Colorectal
HMF003111	HMF003111A	NET
HMF000020	HMF000020B	Colorectal
HMF001007	HMF001007A	Stomach
HMF000761	HMF000761A	Breast
HMF002453	HMF002453A	Bone/Soft tissue
HMF000349	HMF000349A	Colorectal
HMF000795	HMF000795A	Bone/Soft tissue
HMF003462	HMF003462A	Lung
HMF002136	HMF002136A	Lung
HMF003234	HMF003234A	Colorectal
HMF000419	HMF000419A	NET
HMF002400	HMF002400B	Lung
HMF003078	HMF003078A	NET
HMF002893	HMF002893A	Lung
HMF000666	HMF000666B	Lung
HMF000610	HMF000610A	Skin
HMF001927	HMF001927A	Colorectal
HMF000167	HMF000167A	Colorectal
HMF000577	HMF000577A	Breast
HMF003638	HMF003638A	Prostate
HMF001376	HMF001376A	Mesothelioma
HMF002109	HMF002109B	Thymus
HMF000411	HMF000411B	Breast
HMF000331	HMF000331A	Breast
HMF002991	HMF002991A	NET
HMF001462	HMF001462A	Ovary
HMF003386	HMF003386A	Unknown
HMF002289	HMF002289A	Bone/Soft tissue
HMF001749	HMF001749A	Bone/Soft tissue
HMF000322	HMF000322A	NET
HMF000445	HMF000445A	Prostate
HMF002736	HMF002736A	Lung
HMF003314	HMF003314A	Breast
HMF003411	HMF003411A	Lung
HMF003113	HMF003113A	Breast
HMF001562	HMF001562A	Esophagus
HMF000531	HMF000531A	Urinary tract
HMF002889	HMF002889A	Urinary tract
HMF003543	HMF003543A	Colorectal
HMF003085	HMF003085A	Lung
HMF001742	HMF001742A	Lung
HMF003777	HMF003777A	Colorectal
HMF000909	HMF000909A	Lung
HMF001031	HMF001031A	Breast
HMF000632	HMF000632A	Breast
HMF003700	HMF003700A	Lung
HMF002080	HMF002080A	Breast
HMF001410	HMF001410A	Prostate
HMF001540	HMF001540A	Breast
HMF000079	HMF000079A	Prostate
HMF000972	HMF000972A	Mesothelioma
HMF000835	HMF000835B	Lung
HMF002620	HMF002620A	Colorectal
HMF001661	HMF001661A	Lung
HMF001306	HMF001306A	NET
HMF001393	HMF001393A	Lung
HMF001851	HMF001851A	Breast
HMF001164	HMF001164A	Uterus
HMF000983	HMF000983A	Prostate
HMF000513	HMF000513A	Urinary tract
HMF003485	HMF003485A	Bone/Soft tissue
HMF001100	HMF001100A	Skin
HMF000800	HMF000800A	Unknown
HMF000203	HMF000203B	Lung
HMF000448	HMF000448A	Lung
HMF000293	HMF000293A	Lung
HMF002811	HMF002811A	Colorectal
HMF002642	HMF002642A	Breast
HMF001999	HMF001999B	Bone/Soft tissue
HMF001583	HMF001583A	Colorectal
HMF001648	HMF001648A	Lung
HMF000578	HMF000578A	NET
HMF000128	HMF000128A	Lung
HMF003669	HMF003669A	Colorectal
HMF001163	HMF001163A	Breast
HMF000606	HMF000606A	Colorectal
HMF003653	HMF003653A	Colorectal
HMF003137	HMF003137A	Colorectal
HMF002033	HMF002033A	Stomach
HMF003798	HMF003798A	Prostate
HMF002636	HMF002636A	Skin
HMF002351	HMF002351A	NET
HMF000576	HMF000576A	Bone/Soft tissue
HMF002552	HMF002552A	Mesothelioma
HMF002330	HMF002330A	Lung
HMF001697	HMF001697A	Prostate
HMF001654	HMF001654A	Breast
HMF000021	HMF000021A	Breast
HMF002896	HMF002896A	Breast
HMF002454	HMF002454A	Breast
HMF004251	HMF004251A	Mesothelioma
HMF000350	HMF000350A	Lung
HMF001265	HMF001265A	Lung
HMF002689	HMF002689A	Lung
HMF001359	HMF001359A	Lung
HMF002955	HMF002955A	Lung
HMF002144	HMF002144A	Colorectal
HMF003376	HMF003376A	Breast
HMF001933	HMF001933A	Breast
HMF000418	HMF000418A	Skin
HMF000127	HMF000127A	Lung
HMF000592	HMF000592A	Skin
HMF001848	HMF001848A	Lung
HMF002842	HMF002842A	Lung
HMF001581	HMF001581A	NET
HMF003622	HMF003622A	Lung
HMF001892	HMF001892A	Esophagus
HMF001426	HMF001426A	Unknown
HMF000486	HMF000486A	Unknown
HMF002378	HMF002378A	Esophagus
HMF003067	HMF003067A	Colorectal
HMF002323	HMF002323A	Lung
HMF002655	HMF002655A	Breast
HMF000008	HMF000008B	Colorectal
HMF001925	HMF001925B	Prostate
HMF003786	HMF003786A	Colorectal
HMF002886	HMF002886A	Mesothelioma
HMF000624	HMF000624A	Breast
HMF001958	HMF001958A	Lung
HMF002512	HMF002512A	Lung
HMF003441	HMF003441A	Lung
HMF001923	HMF001923A	Bone/Soft tissue
HMF001494	HMF001494A	Prostate
HMF003334	HMF003334A	Colorectal
HMF002579	HMF002579A	Breast
HMF003604	HMF003604A	Lung
HMF001358	HMF001358A	Lung
HMF002939	HMF002939A	Lung
HMF003776	HMF003776A	NET
HMF003169	HMF003169A	Colorectal
HMF002047	HMF002047A	Lung
HMF001039	HMF001039A	Prostate
HMF002337	HMF002337A	Prostate
HMF002052	HMF002052A	Penile
HMF003048	HMF003048A	Colorectal
HMF003128	HMF003128A	Small intestine
HMF002298	HMF002298A	Small intestine
HMF000701	HMF000701A	Breast
HMF000028	HMF000028A	Lung
HMF002944	HMF002944A	Lung
HMF001327	HMF001327A	Breast
HMF000289	HMF000289A	Lung
HMF002246	HMF002246A	Colorectal
HMF003231	HMF003231A	Breast
HMF001561	HMF001561B	Biliary
HMF003643	HMF003643A	Lung
HMF000071	HMF000071A	Lung
HMF002157	HMF002157A	Lung
HMF003644	HMF003644A	Lung
HMF001447	HMF001447A	Breast
HMF000018	HMF000018A	Lung
HMF000410	HMF000410A	Skin
HMF000520	HMF000520A	Lung
HMF004382	HMF004382A	Lung
HMF000690	HMF000690B	Lung
HMF000719	HMF000719A	Breast
HMF002195	HMF002195A	Breast
HMF000319	HMF000319B	Urinary tract
HMF001138	HMF001138A	Breast
HMF003328	HMF003328A	Lung
HMF003528	HMF003528A	Breast
HMF003162	HMF003162A	Skin
HMF000061	HMF000061C	Urinary tract
HMF003024	HMF003024A	Lung
HMF000879	HMF000879A	Prostate
HMF001050	HMF001050A	Lung
HMF000593	HMF000593A	Lung
HMF004202	HMF004202A	Lung
HMF003407	HMF003407A	Prostate
HMF001286	HMF001286A	Urinary tract
HMF001567	HMF001567A	Lung
HMF001245	HMF001245A	Lung
HMF001459	HMF001459A	Breast
HMF002165	HMF002165A	Lung
HMF003129	HMF003129A	Lung
HMF002964	HMF002964A	Prostate
HMF001557	HMF001557A	Lung
HMF000307	HMF000307C	Lung
HMF002668	HMF002668A	Lung
HMF001792	HMF001792A	Lung
HMF001091	HMF001091A	Lung
HMF002500	HMF002500A	Lung
HMF001737	HMF001737A	Lung
HMF001313	HMF001313A	Lung
HMF000407	HMF000407A	Penile
HMF002243	HMF002243A	Skin
HMF002472	HMF002472A	Unknown
HMF001037	HMF001037A	Prostate
HMF000574	HMF000574A	Prostate
HMF002187	HMF002187A	Prostate
HMF000384	HMF000384A	Prostate
HMF002425	HMF002425A	Lung
HMF003959	HMF003959A	Prostate
HMF000340	HMF000340A	Lung
HMF004399	HMF004399A	Lung
HMF001676	HMF001676A	Lung
HMF001495	HMF001495A	Prostate
HMF003192	HMF003192A	Prostate
HMF001113	HMF001113A	Prostate
HMF004170	HMF004170A	Breast
HMF004359	HMF004359A	Lung
HMF004226	HMF004226A	Lung
HMF004279	HMF004279A	Lung
HMF001746	HMF001746A	Skin
HMF004219	HMF004219A	Lung
HMF004011	HMF004011A	Skin
HMF004256	HMF004256A	Vulva
HMF004122	HMF004122A	Lung
HMF004369	HMF004369A	Lung
HMF003916	HMF003916A	Lung
HMF004370	HMF004370A	Lung
HMF004230	HMF004230A	Skin
HMF003880	HMF003880B	Lung
HMF003827	HMF003827B	Lung
HMF003844	HMF003844A	Lung
HMF003830	HMF003830A	Prostate
HMF004336	HMF004336A	Lung
HMF004161	HMF004161B	Skin
HMF004058	HMF004058A	Lung
HMF004149	HMF004149A	Lung
HMF004159	HMF004159A	Lung
HMF004320	HMF004320A	Lung
HMF004139	HMF004139A	Lung
HMF003859	HMF003859A	Lung
HMF004275	HMF004275A	Lung
HMF004039	HMF004039A	Breast
HMF003813	HMF003813A	Lung
HMF004344	HMF004344A	Lung
HMF004008	HMF004008A	Lung
HMF004103	HMF004103A	Lung
HMF003952	HMF003952A	Lung
HMF003956	HMF003956A	Breast
HMF003920	HMF003920A	Lung
HMF003982	HMF003982A	Lung
HMF004022	HMF004022A	Lung
HMF004177	HMF004177B	Lung
HMF004102	HMF004102A	Lung
HMF004133	HMF004133A	Lung
HMF004195	HMF004195A	Lung
HMF004319	HMF004319A	Lung
HMF004282	HMF004282A	Lung
HMF003913	HMF003913A	Lung
HMF003889	HMF003889A	Lung
HMF003600	HMF003600A	Lung
HMF001437	HMF001437A	Ovary
HMF001179	HMF001179A	Lung
HMF002989	HMF002989A	Prostate
HMF001476	HMF001476A	Prostate
HMF000270	HMF000270A	Liver
HMF000816	HMF000816A	Biliary
HMF001548	HMF001548A	Colorectal
HMF001743	HMF001743A	Skin
HMF001639	HMF001639A	Bone/Soft tissue
HMF001395	HMF001395A	Liver
HMF001093	HMF001093A	Ovary
HMF000009	HMF000009A	Lung
HMF000997	HMF000997A	Breast
HMF003635	HMF003635A	Skin
HMF002585	HMF002585A	Lung
HMF003072	HMF003072A	Breast
HMF003062	HMF003062B	Breast
HMF000085	HMF000085A	Breast
HMF001766	HMF001766A	Thyroid
HMF000679	HMF000679A	Prostate
HMF002269	HMF002269A	Lung
HMF003733	HMF003733A	Prostate
HMF003659	HMF003659A	Skin
HMF001283	HMF001283A	Urinary tract
HMF002765	HMF002765B	Breast
HMF002110	HMF002110A	Prostate
HMF000425	HMF000425A	Kidney
HMF002350	HMF002350B	Breast
HMF001724	HMF001724A	Colorectal
HMF002775	HMF002775A	Breast
HMF001547	HMF001547A	Prostate
HMF002029	HMF002029A	Prostate
HMF003585	HMF003585A	Prostate
HMF001824	HMF001824A	Uterus
HMF002427	HMF002427A	Prostate
HMF001882	HMF001882A	Bone/Soft tissue
HMF001381	HMF001381A	NET
HMF000749	HMF000749A	Liver
HMF001750	HMF001750A	Biliary
HMF000295	HMF000295A	Breast
HMF002661	HMF002661A	Skin
HMF003094	HMF003094A	Skin
HMF001811	HMF001811A	Liver
HMF002471	HMF002471A	Kidney
HMF000280	HMF000280A	Ovary
HMF000484	HMF000484A	Liver
HMF002815	HMF002815A	Skin
HMF003330	HMF003330A	Skin
HMF001629	HMF001629A	Lung
HMF002629	HMF002629A	NET
HMF001224	HMF001224A	Ovary
HMF001656	HMF001656A	Breast
HMF003753	HMF003753A	Breast
HMF002787	HMF002787A	Colorectal
HMF003032	HMF003032A	NET
HMF002333	HMF002333A	Skin
HMF001936	HMF001936A	Kidney
HMF003647	HMF003647A	Prostate
HMF003355	HMF003355A	Lung
HMF000756	HMF000756A	Colorectal
HMF003603	HMF003603A	Lung
HMF003335	HMF003335A	Ovary
HMF000706	HMF000706A	Bone/Soft tissue
HMF003182	HMF003182A	Mesothelioma
HMF003090	HMF003090A	Breast
HMF002389	HMF002389A	Prostate
HMF001418	HMF001418A	Breast
HMF002469	HMF002469A	Kidney
HMF003553	HMF003553A	Lung
HMF001874	HMF001874A	Pancreas
HMF002419	HMF002419A	Lung
HMF001856	HMF001856A	Colorectal
HMF001473	HMF001473A	Breast
HMF001940	HMF001940A	Breast
HMF002762	HMF002762A	Unknown
HMF000343	HMF000343A	Uterus
HMF000195	HMF000195B	Breast
HMF002716	HMF002716A	Colorectal
HMF001073	HMF001073A	Mesothelioma
HMF001543	HMF001543A	Prostate
HMF000905	HMF000905A	Uterus
HMF001090	HMF001090A	NET
HMF002591	HMF002591B	Skin
HMF002985	HMF002985A	Breast
HMF001898	HMF001898A	Skin
HMF002134	HMF002134A	Skin
HMF000883	HMF000883A	Stomach
HMF002355	HMF002355A	Breast
HMF000613	HMF000613B	Ovary
HMF000782	HMF000782A	Skin
HMF000743	HMF000743A	Skin
HMF001748	HMF001748A	Skin
HMF001297	HMF001297A	Colorectal
HMF003343	HMF003343A	Unknown
HMF002630	HMF002630A	Prostate
HMF001003	HMF001003A	Esophagus
HMF003640	HMF003640A	Esophagus
HMF003194	HMF003194A	Liver
HMF002946	HMF002946A	Lung
HMF002443	HMF002443B	Esophagus
HMF002832	HMF002832A	Unknown
HMF002307	HMF002307A	Breast
HMF000194	HMF000194A	Ovary
HMF000314	HMF000314A	Breast
HMF002141	HMF002141A	Skin
HMF002492	HMF002492A	Colorectal
HMF001482	HMF001482A	Lung
HMF002798	HMF002798A	NET
HMF001189	HMF001189A	Prostate
HMF003456	HMF003456A	Breast
HMF003668	HMF003668A	Ovary
HMF001147	HMF001147A	Skin
HMF001321	HMF001321A	Biliary
HMF000253	HMF000253A	Skin
HMF000739	HMF000739A	NET
HMF000611	HMF000611A	Kidney
HMF001240	HMF001240A	NET
HMF002069	HMF002069A	Urinary tract
HMF002597	HMF002597A	Urinary tract
HMF003636	HMF003636A	NET
HMF001820	HMF001820A	Breast
HMF000243	HMF000243A	Ovary
HMF000475	HMF000475A	Prostate
HMF000250	HMF000250A	Uterus
HMF000999	HMF000999A	Urinary tract
HMF002866	HMF002866A	Skin
HMF002260	HMF002260A	Prostate
HMF002403	HMF002403A	NET
HMF001523	HMF001523A	Urinary tract
HMF001120	HMF001120A	Skin
HMF003392	HMF003392A	Breast
HMF003160	HMF003160A	Urinary tract
HMF002518	HMF002518A	Prostate
HMF001397	HMF001397A	Esophagus
HMF001705	HMF001705A	Uterus
HMF000844	HMF000844A	Skin
HMF001129	HMF001129A	Prostate
HMF000129	HMF000129A	Urinary tract
HMF002829	HMF002829A	Lung
HMF003499	HMF003499A	Urinary tract
HMF003280	HMF003280A	Urinary tract
HMF002099	HMF002099A	Breast
HMF003040	HMF003040A	Uterus
HMF001969	HMF001969A	Breast
HMF002228	HMF002228A	Lung
HMF000353	HMF000353A	Mesothelioma
HMF001605	HMF001605B	Skin
HMF003737	HMF003737A	Mesothelioma
HMF000227	HMF000227A	Urinary tract
HMF001715	HMF001715A	Bone/Soft tissue
HMF001951	HMF001951A	Colorectal
HMF003476	HMF003476A	Mesothelioma
HMF001682	HMF001682A	Prostate
HMF000736	HMF000736A	NET
HMF001914	HMF001914A	Skin
HMF000962	HMF000962A	Breast
HMF000725	HMF000725A	Skin
HMF001827	HMF001827A	Biliary
HMF002506	HMF002506A	Skin
HMF000519	HMF000519A	Lung
HMF002434	HMF002434A	Prostate
HMF002663	HMF002663A	Prostate
HMF002272	HMF002272A	Breast
HMF002300	HMF002300A	Uterus
HMF001675	HMF001675A	Bone/Soft tissue
HMF002813	HMF002813A	Breast
HMF002690	HMF002690A	Prostate
HMF002635	HMF002635A	Liver
HMF002796	HMF002796A	Breast
HMF002743	HMF002743A	Breast
HMF003281	HMF003281A	Skin
HMF003805	HMF003805A	Colorectal
HMF002566	HMF002566A	Skin
HMF003356	HMF003356A	Urinary tract
HMF003074	HMF003074A	Prostate
HMF002025	HMF002025A	Breast
HMF000481	HMF000481A	Esophagus
HMF002015	HMF002015A	Skin
HMF003612	HMF003612A	Uterus
HMF002912	HMF002912A	Urinary tract
HMF003518	HMF003518A	Breast
HMF000454	HMF000454A	NET
HMF001809	HMF001809A	Skin
HMF000198	HMF000198A	NET
HMF001623	HMF001623A	Prostate
HMF003532	HMF003532A	Uterus
HMF003011	HMF003011A	Skin
HMF002849	HMF002849A	Skin
HMF000884	HMF000884A	Ovary
HMF001208	HMF001208A	Ovary
HMF000785	HMF000785A	Breast
HMF000252	HMF000252A	Bone/Soft tissue
HMF001034	HMF001034A	NET
HMF003177	HMF003177A	Colorectal
HMF002190	HMF002190A	Liver
HMF002699	HMF002699A	Prostate
HMF003076	HMF003076A	Biliary
HMF002486	HMF002486A	Kidney
HMF002511	HMF002511A	Mesothelioma
HMF002737	HMF002737A	Urinary tract
HMF003093	HMF003093A	Skin
HMF003163	HMF003163A	Bone/Soft tissue
HMF003524	HMF003524A	Urinary tract
HMF000599	HMF000599A	Prostate
HMF002288	HMF002288A	Stomach
HMF000976	HMF000976A	Lung
HMF000324	HMF000324A	Urinary tract
HMF000804	HMF000804A	Skin
HMF002162	HMF002162A	Bone/Soft tissue
HMF003679	HMF003679A	Bone/Soft tissue
HMF000988	HMF000988A	Breast
HMF003357	HMF003357A	Skin
HMF000538	HMF000538A	NET
HMF000711	HMF000711A	Urinary tract
HMF002359	HMF002359A	Breast
HMF000231	HMF000231A	Colorectal
HMF002196	HMF002196A	Breast
HMF002150	HMF002150A	Stomach
HMF003680	HMF003680A	Skin
HMF001416	HMF001416A	Unknown
HMF003571	HMF003571A	Urinary tract
HMF001449	HMF001449A	Skin
HMF001524	HMF001524A	Bone/Soft tissue
HMF001308	HMF001308A	Skin
HMF001445	HMF001445A	Skin
HMF002142	HMF002142A	Skin
HMF003519	HMF003519A	Breast
HMF000172	HMF000172A	Urinary tract
HMF003223	HMF003223A	Urinary tract
HMF001412	HMF001412A	Prostate
HMF002920	HMF002920A	Liver
HMF000027	HMF000027A	Skin
HMF000734	HMF000734A	Breast
HMF001887	HMF001887A	Urinary tract
HMF001565	HMF001565A	Liver
HMF000878	HMF000878A	Skin
HMF003715	HMF003715A	Kidney
HMF003525	HMF003525A	Kidney
HMF001638	HMF001638A	Urinary tract
HMF000846	HMF000846A	Skin
HMF000815	HMF000815A	Lung
HMF000550	HMF000550A	Mesothelioma
HMF004024	HMF004024A	Liver
HMF004310	HMF004310A	Lung
HMF004001	HMF004001A	Prostate
HMF004301	HMF004301A	Skin
HMF004385	HMF004385A	Urinary tract
HMF003967	HMF003967B	Skin
HMF003958	HMF003958A	Urinary tract
HMF004332	HMF004332A	Skin
HMF004042	HMF004042A	Breast
HMF004167	HMF004167A	Skin
HMF003863	HMF003863A	Urinary tract
HMF003994	HMF003994A	Unknown
HMF004281	HMF004281A	Lung
HMF003852	HMF003852A	Skin
HMF004243	HMF004243A	Lung
HMF003894	HMF003894A	Skin
HMF003891	HMF003891A	Urinary tract
HMF004337	HMF004337A	Urinary tract
HMF004373	HMF004373A	Prostate
HMF003886	HMF003886A	Skin
HMF003986	HMF003986A	Mesothelioma
HMF003931	HMF003931A	Mesothelioma
HMF004047	HMF004047A	Prostate
HMF004304	HMF004304A	Lung
HMF004217	HMF004217A	Skin
HMF004113	HMF004113A	Prostate
HMF004108	HMF004108A	Skin
HMF004221	HMF004221A	Prostate
HMF004274	HMF004274A	Skin
HMF003901	HMF003901B	Urinary tract
HMF003885	HMF003885A	Prostate
HMF004157	HMF004157A	Breast
HMF003093	HMF003093B	Skin
HMF003884	HMF003884A	Urinary tract
HMF004291	HMF004291A	Skin
HMF004146	HMF004146A	Skin
HMF001439	HMF001439A	Esophagus
HMF000357	HMF000357A	Esophagus
HMF000714	HMF000714B	Bone/Soft tissue
HMF002314	HMF002314A	Skin
HMF000684	HMF000684A	Ovary
HMF003385	HMF003385A	Esophagus
HMF000817	HMF000817A	Breast
HMF002608	HMF002608A	Breast
HMF002336	HMF002336A	Pancreas
HMF002573	HMF002573B	Breast
HMF001387	HMF001387A	Skin
HMF000309	HMF000309A	Breast
HMF000897	HMF000897A	Skin
HMF003022	HMF003022A	Head and neck
HMF000774	HMF000774A	Esophagus
HMF002251	HMF002251A	Ovary
HMF000274	HMF000274A	Skin
HMF003258	HMF003258A	Skin
HMF002948	HMF002948A	Esophagus
HMF000889	HMF000889B	Breast
HMF002574	HMF002574A	Pancreas
HMF001154	HMF001154A	Skin
HMF003365	HMF003365A	Colorectal
HMF000316	HMF000316B	Head and neck
HMF002413	HMF002413A	Ovary
HMF003260	HMF003260A	Ovary
HMF001141	HMF001141A	Head and neck
HMF000508	HMF000508A	Ovary
HMF002490	HMF002490A	Esophagus
HMF002267	HMF002267A	Breast
HMF002606	HMF002606A	Colorectal
HMF003491	HMF003491A	Esophagus
HMF001074	HMF001074A	Esophagus
HMF002880	HMF002880A	Stomach
HMF002555	HMF002555A	Colorectal
HMF002482	HMF002482A	Uterus
HMF001871	HMF001871A	Colorectal
HMF003381	HMF003381A	Head and neck
HMF002131	HMF002131A	Bone/Soft tissue
HMF003548	HMF003548A	Uterus
HMF000355	HMF000355A	Colorectal
HMF000557	HMF000557A	Head and neck
HMF001142	HMF001142A	Colorectal
HMF001722	HMF001722A	Kidney
HMF001329	HMF001329A	Esophagus
HMF002675	HMF002675A	Liver
HMF002603	HMF002603B	Skin
HMF003670	HMF003670A	Breast
HMF002777	HMF002777A	Colorectal
HMF001981	HMF001981A	Stomach
HMF000498	HMF000498B	Double primary
HMF000839	HMF000839A	NET
HMF000457	HMF000457A	Uterus
HMF003329	HMF003329A	Ovary
HMF001181	HMF001181A	Kidney
HMF001107	HMF001107B	Colorectal
HMF002612	HMF002612A	Colorectal
HMF003685	HMF003685A	NET
HMF001814	HMF001814A	Pancreas
HMF000192	HMF000192A	Breast
HMF000148	HMF000148A	Biliary
HMF003686	HMF003686A	CNS
HMF001855	HMF001855A	CNS
HMF000590	HMF000590A	Stomach
HMF003379	HMF003379B	Prostate
HMF000199	HMF000199A	Uterus
HMF002194	HMF002194A	Colorectal
HMF001478	HMF001478A	Breast
HMF000925	HMF000925A	CNS
HMF003406	HMF003406A	CNS
HMF003589	HMF003589A	CNS
HMF001725	HMF001725A	Breast
HMF002821	HMF002821A	CNS
HMF000245	HMF000245A	Biliary
HMF003405	HMF003405A	CNS
HMF003217	HMF003217A	Ovary
HMF002266	HMF002266A	CNS
HMF003204	HMF003204A	Colorectal
HMF002993	HMF002993A	Bone/Soft tissue
HMF001624	HMF001624A	CNS
HMF000649	HMF000649A	CNS
HMF001000	HMF001000A	NET
HMF000570	HMF000570A	CNS
HMF002756	HMF002756A	Breast
HMF003436	HMF003436A	CNS
HMF001167	HMF001167A	CNS
HMF001444	HMF001444A	Colorectal
HMF003496	HMF003496A	Ovary
HMF000329	HMF000329A	CNS
HMF002429	HMF002429A	Colorectal
HMF002679	HMF002679A	Colorectal
HMF003783	HMF003783A	Breast
HMF002244	HMF002244A	Breast
HMF001271	HMF001271A	Breast
HMF003044	HMF003044A	CNS
HMF000037	HMF000037A	Colorectal
HMF002945	HMF002945A	Bone/Soft tissue
HMF001414	HMF001414B	Skin
HMF000214	HMF000214A	Skin
HMF003449	HMF003449A	Breast
HMF000921	HMF000921A	CNS
HMF001070	HMF001070A	CNS
HMF002768	HMF002768A	Skin
HMF000985	HMF000985A	NET
HMF002758	HMF002758A	NET
HMF003374	HMF003374A	Breast
HMF000524	HMF000524A	Ovary
HMF000941	HMF000941A	Breast
HMF002379	HMF002379A	Skin
HMF000449	HMF000449A	Ovary
HMF002343	HMF002343A	CNS
HMF003196	HMF003196A	Skin
HMF002954	HMF002954A	Ovary
HMF000852	HMF000852A	Colorectal
HMF001136	HMF001136A	Ovary
HMF000493	HMF000493A	NET
HMF001380	HMF001380A	Ovary
HMF000535	HMF000535A	Skin
HMF003547	HMF003547A	Pancreas
HMF001312	HMF001312A	Ovary
HMF001888	HMF001888A	CNS
HMF003774	HMF003774A	Vulva
HMF003301	HMF003301A	Lung
HMF002152	HMF002152A	CNS
HMF001810	HMF001810A	Bone/Soft tissue
HMF002281	HMF002281A	Colorectal
HMF001434	HMF001434A	CNS
HMF001177	HMF001177A	Ovary
HMF000177	HMF000177A	Esophagus
HMF000447	HMF000447A	NET
HMF002657	HMF002657A	Breast
HMF003362	HMF003362A	Breast
HMF002532	HMF002532A	Colorectal
HMF000842	HMF000842A	CNS
HMF001369	HMF001369A	Lung
HMF002509	HMF002509A	CNS
HMF000294	HMF000294A	CNS
HMF001853	HMF001853A	Kidney
HMF002730	HMF002730A	Prostate
HMF002548	HMF002548A	Lung
HMF003740	HMF003740A	Skin
HMF002432	HMF002432A	Breast
HMF002179	HMF002179A	Breast
HMF002808	HMF002808A	Skin
HMF002956	HMF002956A	Skin
HMF004331	HMF004331A	Head and neck
HMF000753	HMF000753A	Colorectal
HMF000760	HMF000760A	Colorectal
HMF001533	HMF001533A	Breast
HMF000558	HMF000558A	Breast
HMF000001	HMF000001A	NET
HMF000223	HMF000223A	Ovary
HMF002164	HMF002164A	Lung
HMF000036	HMF000036A	Colorectal
HMF003222	HMF003222A	Esophagus
HMF000024	HMF000024A	Lung
HMF003509	HMF003509A	Breast
HMF003060	HMF003060A	Kidney
HMF003403	HMF003403A	Ovary
HMF001290	HMF001290A	Lung
HMF002958	HMF002958A	Lung
HMF002461	HMF002461A	Breast
HMF000869	HMF000869A	Colorectal
HMF001022	HMF001022A	Colorectal
HMF000217	HMF000217A	Liver
HMF001151	HMF001151A	Urinary tract
HMF000011	HMF000011A	Colorectal
HMF000166	HMF000166A	Colorectal
HMF001061	HMF001061A	Breast
HMF003252	HMF003252A	Breast
HMF003723	HMF003723A	Bone/Soft tissue
HMF001205	HMF001205A	Colorectal
HMF000617	HMF000617A	Lung
HMF000818	HMF000818A	Breast
HMF001934	HMF001934A	Pancreas
HMF000144	HMF000144A	Breast
HMF002970	HMF002970A	Uterus
HMF000207	HMF000207A	Colorectal
HMF000225	HMF000225A	Lung
HMF003224	HMF003224A	Lung
HMF003172	HMF003172A	Ovary
HMF003446	HMF003446A	Breast
HMF001869	HMF001869A	Colorectal
HMF000348	HMF000348A	Colorectal
HMF003609	HMF003609A	Lung
HMF000060	HMF000060A	Urinary tract
HMF000208	HMF000208A	Lung
HMF002065	HMF002065A	Prostate
HMF001831	HMF001831A	Esophagus
HMF000873	HMF000873A	Lung
HMF003498	HMF003498A	Breast
HMF002763	HMF002763B	Lung
HMF001738	HMF001738A	Lung
HMF002001	HMF002001A	Esophagus
HMF003219	HMF003219A	Lung
HMF001026	HMF001026A	Colorectal
HMF002447	HMF002447A	Lung
HMF001653	HMF001653A	Colorectal
HMF002158	HMF002158A	Ovary
HMF002905	HMF002905A	Ovary
HMF000853	HMF000853A	Colorectal
HMF002901	HMF002901A	Lung
HMF002005	HMF002005A	Colorectal
HMF003188	HMF003188A	Colorectal
HMF000103	HMF000103A	Esophagus
HMF001488	HMF001488A	Urinary tract
HMF003267	HMF003267A	Colorectal
HMF002854	HMF002854A	Urinary tract
HMF002713	HMF002713A	Stomach
HMF000618	HMF000618A	Lung
HMF001124	HMF001124A	Lung
HMF003166	HMF003166A	Kidney
HMF000741	HMF000741A	Colorectal
HMF000507	HMF000507A	Lung
HMF000595	HMF000595A	Colorectal
HMF003736	HMF003736A	Lung
HMF003681	HMF003681A	Esophagus
HMF002631	HMF002631A	Lung
HMF000614	HMF000614A	Colorectal
HMF001125	HMF001125A	Breast
HMF002959	HMF002959A	Lung
HMF000178	HMF000178A	Lung
HMF000307	HMF000307A	Lung
HMF000866	HMF000866A	Lung
HMF003570	HMF003570A	Mesothelioma
HMF003660	HMF003660A	Lung
HMF000654	HMF000654A	Ovary
HMF000586	HMF000586A	Ovary
HMF000929	HMF000929A	Lung
HMF002748	HMF002748A	Colorectal
HMF003183	HMF003183A	Lung
HMF003497	HMF003497A	Skin
HMF002117	HMF002117A	Esophagus
HMF003424	HMF003424A	Biliary
HMF000090	HMF000090A	Skin
HMF002860	HMF002860A	Kidney
HMF000414	HMF000414A	Urinary tract
HMF001671	HMF001671A	Breast
HMF003146	HMF003146A	Colorectal
HMF003533	HMF003533A	Colorectal
HMF002414	HMF002414A	Breast
HMF003450	HMF003450A	Breast
HMF002998	HMF002998A	Colorectal
HMF001825	HMF001825A	Mesothelioma
HMF003656	HMF003656A	Lymphoid
HMF003130	HMF003130A	Prostate
HMF002894	HMF002894A	Lung
HMF002494	HMF002494A	Breast
HMF003271	HMF003271A	Biliary
HMF000755	HMF000755A	Prostate
HMF000271	HMF000271A	Lung
HMF000126	HMF000126A	Lung
HMF004017	HMF004017B	Lung
HMF003763	HMF003763A	Lung
HMF003545	HMF003545A	Breast
HMF004121	HMF004121A	Breast
HMF003108	HMF003108A	Lung
HMF003963	HMF003963A	Lung
HMF004086	HMF004086A	Lung
HMF004115	HMF004115A	Lung
HMF003831	HMF003831A	Lung
HMF004342	HMF004342A	Lung
HMF004071	HMF004071A	Breast
HMF003871	HMF003871A	Breast
HMF003861	HMF003861A	Breast
HMF004280	HMF004280A	Breast
HMF003980	HMF003980A	Lung
HMF004098	HMF004098A	Breast
HMF004128	HMF004128A	Lung
HMF004355	HMF004355A	Prostate
HMF001257	HMF001257A	Esophagus
HMF003261	HMF003261A	Skin
HMF002587	HMF002587A	Skin
HMF000744	HMF000744A	Skin
HMF003061	HMF003061A	Colorectal
HMF001248	HMF001248A	Unknown
HMF000078	HMF000078A	Skin
HMF002063	HMF002063A	Breast
HMF000004	HMF000004B	Skin
HMF003079	HMF003079A	Skin
HMF003322	HMF003322A	Colorectal
HMF001509	HMF001509A	Ovary
HMF001546	HMF001546A	Breast
HMF000559	HMF000559A	Colorectal
HMF003675	HMF003675A	Colorectal
HMF000808	HMF000808A	Pancreas
HMF000300	HMF000300A	Skin
HMF000806	HMF000806A	Breast
HMF001590	HMF001590A	Colorectal
HMF002487	HMF002487A	Kidney
HMF002199	HMF002199A	Breast
HMF003452	HMF003452A	Urinary tract
HMF002352	HMF002352A	Kidney
HMF003012	HMF003012A	Pancreas
HMF003572	HMF003572A	Biliary
HMF002346	HMF002346A	Skin
HMF001505	HMF001505A	Colorectal
HMF002441	HMF002441B	Colorectal
HMF003241	HMF003241A	Breast
HMF000032	HMF000032A	Colorectal
HMF002054	HMF002054A	Esophagus
HMF001080	HMF001080A	Urinary tract
HMF001804	HMF001804A	Colorectal
HMF000499	HMF000499A	Skin
HMF002978	HMF002978A	Thyroid
HMF000046	HMF000046A	Prostate
HMF003039	HMF003039A	Stomach
HMF002719	HMF002719A	Colorectal
HMF001049	HMF001049A	Colorectal
HMF003324	HMF003324A	Colorectal
HMF002932	HMF002932A	Breast
HMF002057	HMF002057A	Colorectal
HMF000323	HMF000323C	Breast
HMF000819	HMF000819A	Urinary tract
HMF001783	HMF001783A	Colorectal
HMF002440	HMF002440A	Biliary
HMF003175	HMF003175A	Pancreas
HMF001957	HMF001957A	Small intestine
HMF000492	HMF000492A	Breast
HMF002130	HMF002130A	Skin
HMF001466	HMF001466A	Breast
HMF001264	HMF001264A	Biliary
HMF003206	HMF003206A	Breast
HMF001527	HMF001527A	Esophagus
HMF001277	HMF001277A	Colorectal
HMF000855	HMF000855A	Skin
HMF002501	HMF002501A	Breast
HMF003096	HMF003096A	Breast
HMF000173	HMF000173A	Skin
HMF002234	HMF002234A	Skin
HMF000982	HMF000982A	Breast
HMF000692	HMF000692A	Esophagus
HMF002135	HMF002135A	Breast
HMF002759	HMF002759A	Breast
HMF000932	HMF000932A	Bone/Soft tissue
HMF002791	HMF002791A	Skin
HMF001534	HMF001534A	Skin
HMF002066	HMF002066B	Head and neck
HMF002076	HMF002076A	Head and neck
HMF002361	HMF002361B	Colorectal
HMF003339	HMF003339A	CNS
HMF001035	HMF001035A	Biliary
HMF000628	HMF000628C	Colorectal
HMF003259	HMF003259A	Head and neck
HMF003759	HMF003759A	Colorectal
HMF003755	HMF003755A	Skin
HMF002006	HMF002006A	Skin
HMF002322	HMF002322A	Pancreas
HMF000630	HMF000630A	Colorectal
HMF002692	HMF002692A	Breast
HMF000781	HMF000781A	Breast
HMF003361	HMF003361A	Colorectal
HMF000346	HMF000346A	Skin
HMF001828	HMF001828A	Skin
HMF001384	HMF001384A	Breast
HMF002305	HMF002305A	Urinary tract
HMF001846	HMF001846A	Skin
HMF002093	HMF002093A	Breast
HMF000369	HMF000369A	Colorectal
HMF000048	HMF000048A	Liver
HMF002213	HMF002213A	Colorectal
HMF002908	HMF002908B	Esophagus
HMF000584	HMF000584A	Skin
HMF000367	HMF000367A	Skin
HMF002082	HMF002082A	Colorectal
HMF002572	HMF002572A	Pancreas
HMF002166	HMF002166B	Skin
HMF000285	HMF000285A	Colorectal
HMF003613	HMF003613A	Pancreas
HMF001353	HMF001353A	Skin
HMF003693	HMF003693A	Pancreas
HMF002545	HMF002545A	Skin
HMF003426	HMF003426A	Biliary
HMF002992	HMF002992A	Biliary
HMF001833	HMF001833A	Small intestine
HMF003610	HMF003610A	Colorectal
HMF001830	HMF001830A	Colorectal
HMF001408	HMF001408A	Colorectal
HMF002750	HMF002750A	Colorectal
HMF001759	HMF001759A	Biliary
HMF001069	HMF001069A	Unknown
HMF000376	HMF000376B	Prostate
HMF002383	HMF002383B	Skin
HMF001238	HMF001238A	Colorectal
HMF000512	HMF000512B	Colorectal
HMF000642	HMF000642A	Colorectal
HMF003109	HMF003109A	Skin
HMF002291	HMF002291A	NET
HMF003336	HMF003336A	Lung
HMF003181	HMF003181A	Breast
HMF002507	HMF002507A	Biliary
HMF001374	HMF001374A	Esophagus
HMF000901	HMF000901A	Breast
HMF002458	HMF002458A	Skin
HMF001677	HMF001677A	Esophagus
HMF000791	HMF000791A	Lung
HMF003672	HMF003672A	Liver
HMF002163	HMF002163B	Urinary tract
HMF003802	HMF003802A	Breast
HMF002897	HMF002897A	Colorectal
HMF002856	HMF002856A	Skin
HMF002219	HMF002219A	Skin
HMF000527	HMF000527A	Colorectal
HMF000525	HMF000525A	Skin
HMF002997	HMF002997A	Skin
HMF000102	HMF000102A	Pancreas
HMF002634	HMF002634B	Esophagus
HMF001435	HMF001435A	Urinary tract
HMF003170	HMF003170A	Kidney
HMF002671	HMF002671A	Testis
HMF001978	HMF001978A	Skin
HMF003125	HMF003125A	Colorectal
HMF000566	HMF000566A	Colorectal
HMF000752	HMF000752A	Colorectal
HMF000811	HMF000811B	Esophagus
HMF001324	HMF001324A	Skin
HMF001230	HMF001230A	Biliary
HMF001405	HMF001405A	Breast
HMF003666	HMF003666A	Breast
HMF000356	HMF000356A	Lung
HMF001683	HMF001683A	Head and neck
HMF002229	HMF002229A	Biliary
HMF003402	HMF003402A	Esophagus
HMF002972	HMF002972A	Lung
HMF002983	HMF002983A	Lung
HMF001920	HMF001920A	Skin
HMF001894	HMF001894A	Thyroid
HMF001895	HMF001895A	Esophagus
HMF001719	HMF001719A	Urinary tract
HMF003445	HMF003445A	Colorectal
HMF003690	HMF003690A	Colorectal
HMF002847	HMF002847A	Colorectal
HMF000877	HMF000877A	Urinary tract
HMF001937	HMF001937A	Esophagus
HMF000845	HMF000845A	Colorectal
HMF001191	HMF001191A	Breast
HMF000757	HMF000757A	Liver
HMF001365	HMF001365A	Esophagus
HMF001777	HMF001777A	Vulva
HMF003429	HMF003429A	Breast
HMF002996	HMF002996A	Skin
HMF000389	HMF000389A	Skin
HMF003185	HMF003185A	Urinary tract
HMF001014	HMF001014A	Skin
HMF002332	HMF002332A	Colorectal
HMF002024	HMF002024A	Esophagus
HMF001708	HMF001708A	Breast
HMF000704	HMF000704A	Esophagus
HMF002446	HMF002446A	Urinary tract
HMF001370	HMF001370A	Colorectal
HMF001571	HMF001571A	Prostate
HMF003795	HMF003795A	CNS
HMF001726	HMF001726A	Prostate
HMF000188	HMF000188A	Urinary tract
HMF000672	HMF000672A	CNS
HMF002276	HMF002276A	Colorectal
HMF002848	HMF002848A	Colorectal
HMF002231	HMF002231A	Skin
HMF003760	HMF003760A	Skin
HMF003226	HMF003226A	Esophagus
HMF002683	HMF002683A	Skin
HMF003395	HMF003395A	Kidney
HMF001575	HMF001575A	Breast
HMF003184	HMF003184A	Skin
HMF002249	HMF002249A	Lung
HMF000107	HMF000107A	Skin
HMF004216	HMF004216A	Prostate
HMF001173	HMF001173A	Skin
HMF003930	HMF003930A	Skin
HMF004191	HMF004191A	Head and neck
HMF004386	HMF004386A	Breast
HMF004250	HMF004250A	Skin
HMF003921	HMF003921A	Breast
HMF004106	HMF004106A	Urinary tract
HMF003996	HMF003996A	Urinary tract
HMF001201	HMF001201A	Urinary tract
HMF001085	HMF001085A	Colorectal
HMF000528	HMF000528A	Biliary
HMF001976	HMF001976A	Bone/Soft tissue
HMF000049	HMF000049A	Colorectal
HMF000673	HMF000673A	Kidney
HMF001396	HMF001396B	Testis
HMF001771	HMF001771A	Kidney
HMF002124	HMF002124A	Skin
HMF000220	HMF000220B	Skin
HMF003124	HMF003124A	Skin
HMF002139	HMF002139A	Kidney
HMF000142	HMF000142A	Liver
HMF000776	HMF000776A	Ovary
HMF001394	HMF001394A	Pancreas
HMF000372	HMF000372B	Breast
HMF003211	HMF003211A	Bone/Soft tissue
HMF001714	HMF001714A	Biliary
HMF001356	HMF001356A	Kidney
HMF001930	HMF001930A	Breast
HMF000276	HMF000276A	Bone/Soft tissue
HMF003208	HMF003208A	Colorectal
HMF002386	HMF002386A	Breast
HMF003620	HMF003620A	Unknown
HMF000424	HMF000424A	Penile
HMF001692	HMF001692A	Urinary tract
HMF000187	HMF000187A	Lung
HMF002520	HMF002520B	Ovary
HMF001182	HMF001182A	Skin
HMF001454	HMF001454A	Breast
HMF000015	HMF000015A	Colorectal
HMF001176	HMF001176A	Colorectal
HMF002751	HMF002751A	Ovary
HMF003536	HMF003536A	Pancreas
HMF000971	HMF000971A	Pancreas
HMF002367	HMF002367A	Urinary tract
HMF002445	HMF002445A	Pancreas
HMF002632	HMF002632A	Uterus
HMF002595	HMF002595A	Uterus
HMF002316	HMF002316A	Ovary
HMF000758	HMF000758A	Breast
HMF003440	HMF003440A	Colorectal
HMF001424	HMF001424A	Colorectal
HMF003423	HMF003423A	Skin
HMF002484	HMF002484A	Breast
HMF001615	HMF001615A	Breast
HMF000022	HMF000022A	Colorectal
HMF000169	HMF000169A	Colorectal
HMF002892	HMF002892A	Kidney
HMF003569	HMF003569A	NET
HMF000070	HMF000070A	Ovary
HMF002590	HMF002590A	Unknown
HMF000809	HMF000809C	Skin
HMF002085	HMF002085A	CNS
HMF002725	HMF002725A	Breast
HMF001946	HMF001946A	Colorectal
HMF003332	HMF003332A	Uterus
HMF003349	HMF003349A	Colorectal
HMF000564	HMF000564A	Skin
HMF002793	HMF002793A	Biliary
HMF002008	HMF002008A	Pancreas
HMF002416	HMF002416A	Ovary
HMF003122	HMF003122A	Bone/Soft tissue
HMF000038	HMF000038A	Esophagus
HMF003745	HMF003745A	Breast
HMF000958	HMF000958A	Esophagus
HMF000386	HMF000386A	Stomach
HMF002783	HMF002783A	Unknown
HMF000868	HMF000868A	Pancreas
HMF001032	HMF001032A	Bone/Soft tissue
HMF000824	HMF000824A	Esophagus
HMF001392	HMF001392A	Breast
HMF000317	HMF000317A	Biliary
HMF001837	HMF001837A	CNS
HMF001389	HMF001389A	Ovary
HMF000232	HMF000232A	Skin
HMF002102	HMF002102A	Bone/Soft tissue
HMF002450	HMF002450A	Colorectal
HMF003239	HMF003239A	NET
HMF001023	HMF001023A	Colorectal
HMF001988	HMF001988A	Bone/Soft tissue
HMF003209	HMF003209A	Liver
HMF001568	HMF001568A	Bone/Soft tissue
HMF003773	HMF003773A	CNS
HMF000224	HMF000224A	CNS
HMF003148	HMF003148A	Esophagus
HMF003159	HMF003159A	Prostate
HMF001192	HMF001192A	Bone/Soft tissue
HMF001854	HMF001854A	Bone/Soft tissue
HMF000406	HMF000406A	Esophagus
HMF000030	HMF000030A	Skin
HMF001062	HMF001062A	CNS
HMF003873	HMF003873A	Colorectal
HMF002576	HMF002576A	Lung
HMF000470	HMF000470A	Lung
HMF000204	HMF000204A	Kidney
HMF002119	HMF002119A	Breast
HMF001772	HMF001772A	Unknown
HMF003601	HMF003601A	Liver
HMF004381	HMF004381A	Breast
HMF003864	HMF003864A	Skin
HMF004235	HMF004235A	Skin
HMF001044	HMF001044B	Bone/Soft tissue
HMF003747	HMF003747A	Testis
HMF000334	HMF000334A	Esophagus
HMF000108	HMF000108A	Urinary tract
HMF002537	HMF002537A	Prostate
HMF000458	HMF000458C	Prostate
HMF002468	HMF002468A	Prostate
HMF001249	HMF001249B	Unknown
HMF003540	HMF003540A	Head and neck
HMF001078	HMF001078A	Esophagus
HMF000474	HMF000474A	Prostate
HMF000312	HMF000312A	Prostate
HMF000002	HMF000002A	Prostate
HMF001158	HMF001158A	Head and neck
HMF000748	HMF000748A	Head and neck
HMF001603	HMF001603A	NET
HMF000394	HMF000394A	Urinary tract
HMF001716	HMF001716A	Urinary tract
HMF002207	HMF002207A	Prostate
HMF000075	HMF000075A	Colorectal
HMF001553	HMF001553A	Bone/Soft tissue
HMF002072	HMF002072A	Biliary
HMF003631	HMF003631A	Head and neck
HMF003054	HMF003054A	Urinary tract
HMF001728	HMF001728A	Ovary
HMF001789	HMF001789A	Uterus
HMF001867	HMF001867C	Prostate
HMF002810	HMF002810B	Colorectal
HMF001720	HMF001720A	Prostate
HMF001636	HMF001636A	Prostate
HMF001773	HMF001773A	Colorectal
HMF000421	HMF000421A	Prostate
HMF001455	HMF001455A	Breast
HMF002340	HMF002340A	Prostate
HMF000351	HMF000351A	Prostate
HMF003597	HMF003597A	Prostate
HMF000960	HMF000960A	Prostate
HMF003434	HMF003434A	Urinary tract
HMF003751	HMF003751A	Urinary tract
HMF002018	HMF002018A	Bone/Soft tissue
HMF002410	HMF002410A	Head and neck
HMF001485	HMF001485A	Prostate
HMF001378	HMF001378B	Prostate
HMF002465	HMF002465A	Urinary tract
HMF000945	HMF000945A	Prostate
HMF002299	HMF002299A	Prostate
HMF000790	HMF000790A	Prostate
HMF001101	HMF001101B	Uterus
HMF001609	HMF001609A	Esophagus
HMF000364	HMF000364A	Colorectal
HMF001817	HMF001817A	Prostate
HMF000472	HMF000472B	Head and neck
HMF000162	HMF000162B	Prostate
HMF001186	HMF001186A	Prostate
HMF003161	HMF003161A	Prostate
HMF002421	HMF002421A	Prostate
HMF003006	HMF003006A	Prostate
HMF001596	HMF001596B	Prostate
HMF000377	HMF000377A	Prostate
HMF001572	HMF001572A	Prostate
HMF000956	HMF000956A	Prostate
HMF000197	HMF000197A	Prostate
HMF002771	HMF002771A	Prostate
HMF002536	HMF002536A	Prostate
HMF003667	HMF003667A	Urinary tract
HMF001071	HMF001071A	Prostate
HMF003617	HMF003617A	Prostate
HMF002211	HMF002211B	Urinary tract
HMF001526	HMF001526A	Prostate
HMF002941	HMF002941A	Uterus
HMF001112	HMF001112A	Prostate
HMF001687	HMF001687A	Urinary tract
HMF000881	HMF000881C	Prostate
HMF003139	HMF003139A	Colorectal
HMF001160	HMF001160A	Breast
HMF001307	HMF001307B	Colorectal
HMF000764	HMF000764A	Urinary tract
HMF001106	HMF001106A	Prostate
HMF000796	HMF000796A	Pancreas
HMF002309	HMF002309A	Colorectal
HMF003687	HMF003687A	Biliary
HMF002553	HMF002553A	Urinary tract
HMF000501	HMF000501C	Prostate
HMF003642	HMF003642A	Prostate
HMF002106	HMF002106A	Prostate
HMF003268	HMF003268A	Prostate
HMF003275	HMF003275A	Urinary tract
HMF003088	HMF003088A	Prostate
HMF000007	HMF000007A	Prostate
HMF001243	HMF001243A	Ovary
HMF003114	HMF003114A	Prostate
HMF001220	HMF001220A	Prostate
HMF003582	HMF003582A	Prostate
HMF002582	HMF002582A	Ovary
HMF002390	HMF002390A	Prostate
HMF002605	HMF002605A	Head and neck
HMF000363	HMF000363A	Pancreas
HMF002660	HMF002660A	Colorectal
HMF003152	HMF003152A	Prostate
HMF002564	HMF002564A	Prostate
HMF003655	HMF003655A	Urinary tract
HMF002279	HMF002279A	Prostate
HMF000109	HMF000109A	Skin
HMF002206	HMF002206A	Urinary tract
HMF000803	HMF000803A	Prostate
HMF003244	HMF003244A	Prostate
HMF003551	HMF003551A	Prostate
HMF003120	HMF003120A	Bone/Soft tissue
HMF003515	HMF003515A	Colorectal
HMF001758	HMF001758A	Prostate
HMF000490	HMF000490A	Head and neck
HMF001839	HMF001839A	Prostate
HMF000121	HMF000121A	Prostate
HMF000822	HMF000822A	Prostate
HMF000201	HMF000201A	Ovary
HMF002594	HMF002594A	Urinary tract
HMF002694	HMF002694A	Colorectal
HMF002214	HMF002214A	Unknown
HMF001175	HMF001175A	Lung
HMF000473	HMF000473A	Stomach
HMF003179	HMF003179A	Bone/Soft tissue
HMF001668	HMF001668B	Urinary tract
HMF001399	HMF001399A	Urinary tract
HMF003732	HMF003732A	Prostate
HMF002007	HMF002007A	Biliary
HMF001627	HMF001627A	Prostate
HMF000902	HMF000902B	Prostate
HMF001470	HMF001470A	Mesothelioma
HMF000687	HMF000687A	Unknown
HMF003488	HMF003488A	CNS
HMF002476	HMF002476A	Prostate
HMF002176	HMF002176A	Bone/Soft tissue
HMF000430	HMF000430A	Prostate
HMF001929	HMF001929A	Bone/Soft tissue
HMF003290	HMF003290A	Lung
HMF000661	HMF000661A	Bone/Soft tissue
HMF002812	HMF002812A	Urinary tract
HMF001054	HMF001054A	Urinary tract
HMF002649	HMF002649A	Adrenal
HMF002217	HMF002217A	Prostate
HMF002930	HMF002930A	Prostate
HMF001322	HMF001322A	CNS
HMF000993	HMF000993A	Esophagus
HMF000391	HMF000391B	Prostate
HMF003380	HMF003380A	Vulva
HMF001229	HMF001229A	Ovary
HMF003004	HMF003004A	Ovary
HMF000975	HMF000975A	Prostate
HMF002438	HMF002438A	CNS
HMF001593	HMF001593A	CNS
HMF001939	HMF001939A	Thyroid
HMF001291	HMF001291A	Bone/Soft tissue
HMF002580	HMF002580A	Prostate
HMF002625	HMF002625A	Breast
HMF002925	HMF002925A	Prostate
HMF003711	HMF003711A	Head and neck
HMF003103	HMF003103A	Prostate
HMF001712	HMF001712A	Bone/Soft tissue
HMF002235	HMF002235A	Prostate
HMF002067	HMF002067A	Prostate
HMF000429	HMF000429A	Prostate
HMF001194	HMF001194A	CNS
HMF002156	HMF002156A	Prostate
HMF003132	HMF003132A	Lung
HMF001168	HMF001168B	Uterus
HMF003541	HMF003541A	Prostate
HMF000039	HMF000039A	Head and neck
HMF000823	HMF000823A	Head and neck
HMF000918	HMF000918A	Prostate
HMF000740	HMF000740A	Prostate
HMF000017	HMF000017A	Prostate
HMF002940	HMF002940A	Lung
HMF001980	HMF001980A	Skin
HMF003036	HMF003036A	Prostate
HMF002610	HMF002610A	Lung
HMF002198	HMF002198A	Prostate
HMF000446	HMF000446A	Lung
HMF002262	HMF002262A	Prostate
HMF003489	HMF003489A	Unknown
HMF001744	HMF001744A	Unknown
HMF000678	HMF000678A	Urinary tract
HMF000986	HMF000986A	Prostate
HMF001304	HMF001304A	Prostate
HMF003416	HMF003416A	Skin
HMF003850	HMF003850A	Breast
HMF003826	HMF003826A	Prostate
HMF003948	HMF003948A	Prostate
HMF004057	HMF004057A	Prostate
HMF003918	HMF003918A	Prostate
HMF004396	HMF004396A	Ovary
HMF004176	HMF004176A	Bone/Soft tissue
HMF003939	HMF003939A	Urinary tract
HMF003925	HMF003925A	Urinary tract
HMF004049	HMF004049A	Prostate
HMF004048	HMF004048A	Lung
HMF004363	HMF004363A	Prostate
HMF003822	HMF003822A	Prostate
HMF004189	HMF004189A	Prostate
HMF004322	HMF004322A	CNS
HMF004105	HMF004105A	Ovary
HMF004228	HMF004228A	Prostate
HMF003893	HMF003893A	Prostate
HMF003914	HMF003914A	Prostate
HMF001293	HMF001293A	Breast
HMF000656	HMF000656A	Breast
HMF002184	HMF002184A	Ovary
HMF002397	HMF002397A	Breast
HMF001962	HMF001962A	Breast
HMF000476	HMF000476A	Breast
HMF000549	HMF000549A	Unknown
HMF002431	HMF002431A	Uterus
HMF001718	HMF001718A	Breast
HMF003703	HMF003703A	Breast
HMF002031	HMF002031A	Head and neck
HMF003351	HMF003351A	NET
HMF000745	HMF000745A	Colorectal
HMF000693	HMF000693B	Breast
HMF003323	HMF003323A	Colorectal
HMF000919	HMF000919A	Breast
HMF001143	HMF001143A	Liver
HMF000579	HMF000579B	Breast
HMF000153	HMF000153A	Liver
HMF001204	HMF001204A	Breast
HMF003197	HMF003197A	Colorectal
HMF000950	HMF000950A	Breast
HMF001780	HMF001780A	Breast
HMF000175	HMF000175A	Biliary
HMF002312	HMF002312A	Breast
HMF000397	HMF000397A	Breast
HMF000403	HMF000403A	Breast
HMF000650	HMF000650A	Unknown
HMF002965	HMF002965A	Breast
HMF001905	HMF001905A	Breast
HMF001942	HMF001942A	Colorectal
HMF001879	HMF001879A	Skin
HMF002204	HMF002204A	Colorectal
HMF002957	HMF002957A	Colorectal
HMF000154	HMF000154B	Unknown
HMF002698	HMF002698A	Lung
HMF002662	HMF002662A	Lung
HMF000645	HMF000645A	Pancreas
HMF000686	HMF000686A	Lung
HMF002839	HMF002839A	Ovary
HMF001019	HMF001019A	Breast
HMF000040	HMF000040A	Head and neck
HMF002918	HMF002918A	Liver
HMF001362	HMF001362B	Bone/Soft tissue
HMF001864	HMF001864A	Unknown
HMF000887	HMF000887A	Breast
HMF002827	HMF002827A	Bone/Soft tissue
HMF001431	HMF001431A	Kidney
HMF002600	HMF002600A	Breast
HMF003121	HMF003121A	Skin
HMF003550	HMF003550A	Lung
HMF003171	HMF003171A	Skin
HMF003220	HMF003220A	Unknown
HMF000140	HMF000140A	Urinary tract
HMF002030	HMF002030A	Head and neck
HMF003599	HMF003599A	Breast
HMF000597	HMF000597A	Skin
HMF001280	HMF001280A	Breast
HMF001655	HMF001655A	Colorectal
HMF000395	HMF000395A	Breast
HMF000937	HMF000937A	Breast
HMF001845	HMF001845A	Esophagus
HMF000930	HMF000930A	Colorectal
HMF003358	HMF003358A	Unknown
HMF001950	HMF001950A	Head and neck
HMF001643	HMF001643A	Head and neck
HMF003118	HMF003118A	Lung
HMF003490	HMF003490A	Esophagus
HMF000545	HMF000545A	Breast
HMF003240	HMF003240B	Uterus
HMF001351	HMF001351A	Breast
HMF000434	HMF000434A	Head and neck
HMF001180	HMF001180A	CNS
HMF002101	HMF002101A	Skin
HMF000352	HMF000352A	Urinary tract
HMF001733	HMF001733A	Mesothelioma
HMF000339	HMF000339A	Biliary
HMF000733	HMF000733A	Breast
HMF002045	HMF002045A	Colorectal
HMF002563	HMF002563A	Kidney
HMF001119	HMF001119A	Head and neck
HMF003628	HMF003628A	Prostate
HMF003295	HMF003295A	Bone/Soft tissue
HMF003003	HMF003003A	Breast
HMF001711	HMF001711A	Breast
HMF003366	HMF003366A	Liver
HMF000491	HMF000491A	Lung
HMF003688	HMF003688A	Ovary
HMF003650	HMF003650A	Unknown
HMF003410	HMF003410A	Head and neck
HMF001140	HMF001140A	Colorectal
HMF000594	HMF000594B	Skin
HMF001620	HMF001620A	Skin
HMF002727	HMF002727A	Biliary
HMF003370	HMF003370A	Breast
HMF001407	HMF001407A	Biliary
HMF000440	HMF000440A	Uterus
HMF003176	HMF003176A	Skin
HMF001355	HMF001355A	NET
HMF002705	HMF002705A	Biliary
HMF001799	HMF001799A	CNS
HMF001564	HMF001564A	Uterus
HMF000735	HMF000735A	Breast
HMF001613	HMF001613A	Lymphoid
HMF001195	HMF001195B	Skin
HMF001865	HMF001865A	Pancreas
HMF002095	HMF002095A	Skin
HMF003255	HMF003255A	Unknown
HMF001448	HMF001448A	Skin
HMF003215	HMF003215A	Colorectal
HMF003466	HMF003466A	Bone/Soft tissue
HMF000928	HMF000928A	Bone/Soft tissue
HMF000133	HMF000133A	Breast
HMF001582	HMF001582A	Head and neck
HMF001263	HMF001263A	Breast
HMF001970	HMF001970A	Breast
HMF000157	HMF000157A	Esophagus
HMF002754	HMF002754A	Thyroid
HMF000979	HMF000979A	Skin
HMF000502	HMF000502A	Breast
HMF000385	HMF000385A	Urinary tract
HMF002321	HMF002321A	Skin
HMF000097	HMF000097A	Skin
HMF001162	HMF001162A	Skin
HMF002132	HMF002132A	Urinary tract
HMF003421	HMF003421A	Skin
HMF004329	HMF004329A	Skin
HMF004242	HMF004242A	Prostate
HMF004206	HMF004206A	Colorectal
HMF004010	HMF004010A	Breast
HMF004080	HMF004080A	Skin
HMF004030	HMF004030A	Breast
HMF001982	HMF001982B	Breast
HMF003922	HMF003922A	Skin
HMF004084	HMF004084A	Urinary tract
HMF003849	HMF003849A	Breast
HMF004335	HMF004335A	Breast
HMF004276	HMF004276A	Breast
HMF003947	HMF003947A	Kidney
HMF004340	HMF004340A	Skin
HMF003924	HMF003924A	Skin
HMF003840	HMF003840A	Skin
HMF003860	HMF003860A	Skin
HMF004125	HMF004125A	Skin
HMF002328	HMF002328A	Skin
HMF001212	HMF001212A	Colorectal
HMF002178	HMF002178A	Skin
HMF002286	HMF002286A	Skin
HMF001377	HMF001377A	Bone/Soft tissue
HMF002872	HMF002872A	Bone/Soft tissue
HMF000751	HMF000751A	Liver
HMF003205	HMF003205A	Ovary
HMF001027	HMF001027A	Colorectal
HMF002942	HMF002942A	Colorectal
HMF000147	HMF000147A	Vulva
HMF000488	HMF000488A	Pancreas
HMF000485	HMF000485A	Skin
HMF001111	HMF001111A	Prostate
HMF002081	HMF002081A	Breast
HMF002040	HMF002040A	Skin
HMF001315	HMF001315A	Esophagus
HMF000603	HMF000603A	Pancreas
HMF001915	HMF001915A	Bone/Soft tissue
HMF003150	HMF003150A	Pancreas
HMF001606	HMF001606A	Head and neck
HMF001097	HMF001097B	Colorectal
HMF002209	HMF002209A	Colorectal
HMF002571	HMF002571A	Bone/Soft tissue
HMF000010	HMF000010A	Prostate
HMF001520	HMF001520A	Colorectal
HMF000636	HMF000636A	Pancreas
HMF000251	HMF000251A	Breast
HMF004056	HMF004056A	Bone/Soft tissue
HMF000152	HMF000152A	Colorectal
HMF002559	HMF002559A	Breast
HMF000318	HMF000318A	Colorectal
HMF002391	HMF002391A	Breast
HMF000408	HMF000408A	Breast
HMF001607	HMF001607A	Breast
HMF000969	HMF000969A	Urinary tract
HMF001721	HMF001721A	Breast
HMF001157	HMF001157A	Breast
HMF000242	HMF000242A	Ovary
HMF002192	HMF002192A	Esophagus
HMF001798	HMF001798A	Unknown
HMF001388	HMF001388A	Colorectal
HMF001430	HMF001430A	Breast
HMF002589	HMF002589A	Breast
HMF003264	HMF003264A	Breast
HMF003417	HMF003417A	Breast
HMF002898	HMF002898A	Stomach
HMF002619	HMF002619A	Colorectal
HMF003778	HMF003778A	Esophagus
HMF002329	HMF002329A	Breast
HMF001145	HMF001145A	Breast
HMF002704	HMF002704A	Urinary tract
HMF001935	HMF001935A	Unknown
HMF003227	HMF003227A	Breast
HMF003083	HMF003083A	Urinary tract
HMF002041	HMF002041A	Urinary tract
HMF002335	HMF002335A	CNS
HMF001333	HMF001333A	CNS
HMF003029	HMF003029A	Colorectal
HMF003015	HMF003015A	CNS
HMF003517	HMF003517A	CNS
HMF000977	HMF000977B	Bone/Soft tissue
HMF000239	HMF000239A	Breast
HMF001602	HMF001602A	CNS
HMF002474	HMF002474A	CNS
HMF000420	HMF000420A	Esophagus
HMF001910	HMF001910A	CNS
HMF000184	HMF000184A	Breast
HMF003049	HMF003049A	Breast
HMF002549	HMF002549A	Colorectal
HMF002113	HMF002113A	Kidney
HMF003232	HMF003232A	CNS
HMF002122	HMF002122A	Breast
HMF000255	HMF000255A	Breast
HMF000655	HMF000655A	CNS
HMF000731	HMF000731A	Breast
HMF002648	HMF002648A	Ovary
HMF002696	HMF002696A	Colorectal
HMF000354	HMF000354A	Breast
HMF002530	HMF002530A	Esophagus
HMF001975	HMF001975A	Esophagus
HMF003468	HMF003468A	Colorectal
HMF003634	HMF003634A	Colorectal
HMF003303	HMF003303A	Breast
HMF003256	HMF003256A	Esophagus
HMF001020	HMF001020A	CNS
HMF000120	HMF000120A	Pancreas
HMF003621	HMF003621A	Kidney
HMF001767	HMF001767A	Colorectal
HMF002772	HMF002772A	Esophagus
HMF001847	HMF001847A	Esophagus
HMF001131	HMF001131B	Colorectal
HMF001278	HMF001278A	Lung
HMF000913	HMF000913A	CNS
HMF002459	HMF002459A	Lung
HMF003157	HMF003157A	CNS
HMF002598	HMF002598A	Ovary
HMF003321	HMF003321B	Vulva
HMF001331	HMF001331A	CNS
HMF000373	HMF000373A	Bone/Soft tissue
HMF000426	HMF000426A	Esophagus
HMF003800	HMF003800A	Breast
HMF003727	HMF003727A	Colorectal
HMF003433	HMF003433A	CNS
HMF000068	HMF000068A	Biliary
HMF002721	HMF002721A	Breast
HMF000813	HMF000813A	Colorectal
HMF003229	HMF003229A	Kidney
HMF003095	HMF003095A	Esophagus
HMF001363	HMF001363A	Urinary tract
HMF001538	HMF001538A	Colorectal
HMF001793	HMF001793A	Lung
HMF001115	HMF001115A	Esophagus
HMF002368	HMF002368A	Breast
HMF001464	HMF001464A	Kidney
HMF004062	HMF004062A	Breast
HMF001372	HMF001372A	Lung
HMF003782	HMF003782A	Colorectal
HMF002068	HMF002068A	Kidney
HMF002239	HMF002239A	Colorectal
HMF000893	HMF000893A	Lung
HMF001503	HMF001503A	Colorectal
HMF003018	HMF003018A	Ovary
HMF001857	HMF001857A	Lung
HMF003214	HMF003214A	Esophagus
HMF000583	HMF000583A	Breast
HMF002773	HMF002773A	Skin
HMF001604	HMF001604A	Colorectal
HMF002831	HMF002831A	Breast
HMF001535	HMF001535A	Breast
HMF002364	HMF002364A	Breast
HMF001043	HMF001043A	Stomach
HMF001803	HMF001803A	Esophagus
HMF000398	HMF000398A	Colorectal
HMF002533	HMF002533A	NET
HMF000368	HMF000368B	Bone/Soft tissue
HMF001732	HMF001732A	Bone/Soft tissue
HMF002924	HMF002924A	Urinary tract
HMF001698	HMF001698A	Breast
HMF001723	HMF001723A	Colorectal
HMF002984	HMF002984A	Unknown
HMF000984	HMF000984B	Breast
HMF001172	HMF001172A	Breast
HMF003034	HMF003034A	Breast
HMF001104	HMF001104A	Colorectal
HMF001197	HMF001197A	Pancreas
HMF001858	HMF001858A	Esophagus
HMF001522	HMF001522A	Colorectal
HMF001690	HMF001690A	Breast
HMF002569	HMF002569A	Breast
HMF001429	HMF001429A	Colorectal
HMF001688	HMF001688A	Colorectal
HMF001598	HMF001598A	NET
HMF001041	HMF001041A	Breast
HMF001148	HMF001148A	Breast
HMF000125	HMF000125A	Ovary
HMF003720	HMF003720B	Breast
HMF001461	HMF001461B	Breast
HMF003272	HMF003272A	Kidney
HMF000870	HMF000870A	Colorectal
HMF001808	HMF001808A	Stomach
HMF001984	HMF001984A	Esophagus
HMF002296	HMF002296A	Esophagus
HMF001075	HMF001075A	Skin
HMF001484	HMF001484A	Kidney
HMF002327	HMF002327A	Breast
HMF003454	HMF003454A	Adrenal
HMF002711	HMF002711A	Urinary tract
HMF003051	HMF003051A	Colorectal
HMF002356	HMF002356A	Ovary
HMF003058	HMF003058A	Colorectal
HMF000366	HMF000366A	Breast
HMF002890	HMF002890A	Urinary tract
HMF002168	HMF002168A	Ovary
HMF001225	HMF001225A	Breast
HMF001319	HMF001319A	Colorectal
HMF000073	HMF000073A	Lymphoid
HMF003025	HMF003025A	Breast
HMF002153	HMF002153A	Skin
HMF002049	HMF002049A	Lung
HMF002205	HMF002205A	Colorectal
HMF000644	HMF000644A	Colorectal
HMF003140	HMF003140A	Colorectal
HMF000851	HMF000851A	Breast
HMF002599	HMF002599A	Breast
HMF000651	HMF000651A	Breast
HMF001751	HMF001751A	Skin
HMF001770	HMF001770A	Skin
HMF000634	HMF000634A	Urinary tract
HMF001254	HMF001254A	Skin
HMF001457	HMF001457A	Biliary
HMF002540	HMF002540A	Breast
HMF002227	HMF002227A	Skin
HMF002967	HMF002967A	Colorectal
HMF001926	HMF001926A	Esophagus
HMF002934	HMF002934A	Lung
HMF000086	HMF000086A	Breast
HMF001805	HMF001805A	Prostate
HMF003495	HMF003495A	Skin
HMF002301	HMF002301A	Colorectal
HMF003483	HMF003483A	Colorectal
HMF002613	HMF002613A	Urinary tract
HMF002565	HMF002565A	Kidney
HMF001076	HMF001076A	Breast
HMF002202	HMF002202A	Skin
HMF001660	HMF001660A	Kidney
HMF002218	HMF002218A	Skin
HMF000828	HMF000828A	Breast
HMF000933	HMF000933A	Lung
HMF000105	HMF000105A	Unknown
HMF002707	HMF002707A	Skin
HMF002519	HMF002519A	Lung
HMF001597	HMF001597A	Breast
HMF001261	HMF001261A	Skin
HMF001508	HMF001508A	Colorectal
HMF002809	HMF002809A	Breast
HMF000497	HMF000497A	Breast
HMF002212	HMF002212A	Ovary
HMF003619	HMF003619A	Colorectal
HMF000080	HMF000080A	Ovary
HMF002616	HMF002616A	Colorectal
HMF002070	HMF002070A	Unknown
HMF002053	HMF002053A	Colorectal
HMF002801	HMF002801A	Breast
HMF002084	HMF002084A	Lung
HMF003474	HMF003474A	Mesothelioma
HMF002795	HMF002795A	Colorectal
HMF000478	HMF000478A	Lung
HMF003283	HMF003283A	Breast
HMF001670	HMF001670A	Esophagus
HMF001309	HMF001309A	Lung
HMF003556	HMF003556A	Ovary
HMF003363	HMF003363A	Breast
HMF002652	HMF002652A	Breast
HMF003263	HMF003263A	Colorectal
HMF002914	HMF002914A	Lung
HMF003057	HMF003057A	Colorectal
HMF001769	HMF001769A	Unknown
HMF001269	HMF001269A	Breast
HMF000113	HMF000113A	Lung
HMF002840	HMF002840A	Urinary tract
HMF004389	HMF004389A	Kidney
HMF000131	HMF000131A	Kidney
HMF004088	HMF004088A	Skin
HMF004257	HMF004257A	Urinary tract
HMF004215	HMF004215A	Breast
HMF004375	HMF004375A	Urinary tract
HMF004345	HMF004345A	Skin
HMF004294	HMF004294A	Skin
HMF004265	HMF004265A	Skin
HMF004383	HMF004383A	Skin
HMF003898	HMF003898A	Kidney
HMF001231	HMF001231A	Pancreas
HMF000328	HMF000328A	Uterus
HMF003530	HMF003530A	Pancreas
HMF001573	HMF001573A	Small intestine
HMF002577	HMF002577A	Biliary
HMF001460	HMF001460B	NET
HMF001406	HMF001406A	Esophagus
HMF001922	HMF001922A	Colorectal
HMF001990	HMF001990A	Thyroid
HMF000722	HMF000722A	Esophagus
HMF002245	HMF002245A	Uterus
HMF003286	HMF003286A	Esophagus
HMF003400	HMF003400A	Pancreas
HMF002105	HMF002105A	Esophagus
HMF000471	HMF000471A	Uterus
HMF000069	HMF000069A	Ovary
HMF002098	HMF002098A	NET
HMF002009	HMF002009A	Liver
HMF002643	HMF002643B	Uterus
HMF001659	HMF001659B	Biliary
HMF002695	HMF002695A	Biliary
HMF000412	HMF000412A	Biliary
HMF002048	HMF002048A	Biliary
HMF002100	HMF002100A	Colorectal
HMF003742	HMF003742A	Esophagus
HMF003587	HMF003587A	Esophagus
HMF001518	HMF001518A	Pancreas
HMF002294	HMF002294A	Biliary
HMF002544	HMF002544A	Ovary
HMF002586	HMF002586A	Ovary
HMF001835	HMF001835A	Small intestine
HMF003333	HMF003333A	Esophagus
HMF001159	HMF001159A	Ovary
HMF003661	HMF003661A	Colorectal
HMF002089	HMF002089A	Urinary tract
HMF002466	HMF002466A	Liver
HMF001273	HMF001273A	Unknown
HMF000605	HMF000605A	Esophagus
HMF002370	HMF002370A	Esophagus
HMF000638	HMF000638A	Biliary
HMF000095	HMF000095A	Stomach
HMF001472	HMF001472A	NET
HMF003615	HMF003615A	Liver
HMF000546	HMF000546A	Uterus
HMF001776	HMF001776A	Uterus
HMF001307	HMF001307A	Colorectal
HMF001904	HMF001904A	Biliary
HMF000358	HMF000358A	Biliary
HMF000863	HMF000863A	Esophagus
HMF002609	HMF002609A	Urinary tract
HMF003564	HMF003564A	Colorectal
HMF000005	HMF000005A	Prostate
HMF000327	HMF000327A	Uterus
HMF002614	HMF002614A	NET
HMF001420	HMF001420A	Liver
HMF001768	HMF001768A	Liver
HMF002320	HMF002320A	Liver
HMF002075	HMF002075A	Breast
HMF002508	HMF002508A	Kidney
HMF003987	HMF003987A	Liver
HMF004348	HMF004348A	Prostate
HMF004211	HMF004211A	Thyroid
HMF002517	HMF002517A	Prostate
HMF001652	HMF001652A	Colorectal
HMF002362	HMF002362A	Kidney
HMF000213	HMF000213B	Kidney
HMF003544	HMF003544A	Lung
HMF001440	HMF001440A	Prostate
HMF000826	HMF000826B	Prostate
HMF003266	HMF003266A	Prostate
HMF003699	HMF003699A	Mesothelioma
HMF003233	HMF003233A	Lung
HMF001592	HMF001592B	Prostate
HMF003467	HMF003467A	Urinary tract
HMF002844	HMF002844A	Urinary tract
HMF003099	HMF003099A	Breast
HMF000663	HMF000663A	Prostate
HMF001806	HMF001806A	Prostate
HMF002388	HMF002388A	Kidney
HMF001943	HMF001943A	Kidney
HMF000898	HMF000898A	Colorectal
HMF000141	HMF000141A	Prostate
HMF001217	HMF001217A	Prostate
HMF003443	HMF003443A	Breast
HMF003063	HMF003063A	Prostate
HMF001486	HMF001486A	Colorectal
HMF000296	HMF000296B	Lung
HMF001616	HMF001616A	Kidney
HMF000212	HMF000212A	Prostate
HMF000062	HMF000062A	Colorectal
HMF002079	HMF002079A	Prostate
HMF001357	HMF001357A	Prostate
HMF000934	HMF000934A	Kidney
HMF001514	HMF001514A	Urinary tract
HMF003633	HMF003633A	Kidney
HMF001260	HMF001260A	Prostate
HMF002363	HMF002363A	Breast
HMF002151	HMF002151A	Breast
HMF002473	HMF002473A	Breast
HMF001354	HMF001354A	Biliary
HMF001218	HMF001218A	Skin
HMF001537	HMF001537A	Prostate
HMF002913	HMF002913A	Esophagus
HMF002541	HMF002541A	Stomach
HMF002524	HMF002524A	Breast
HMF002020	HMF002020A	Esophagus
HMF000916	HMF000916A	Colorectal
HMF001475	HMF001475A	Lymphoid
HMF001425	HMF001425A	Breast
HMF001545	HMF001545A	Lymphoid
HMF002374	HMF002374A	Prostate
HMF000215	HMF000215A	Lymphoid
HMF004267	HMF004267A	Lymphoid
HMF004315	HMF004315A	Breast
HMF004286	HMF004286A	Breast
HMF004193	HMF004193A	Prostate
HMF003819	HMF003819A	Colorectal
HMF004004	HMF004004A	Breast
HMF004229	HMF004229A	Prostate
HMF001868	HMF001868A	Breast
HMF000612	HMF000612A	Breast
HMF001275	HMF001275A	Breast
HMF003174	HMF003174A	Breast
HMF000092	HMF000092A	Pancreas
HMF000087	HMF000087A	Breast
HMF001468	HMF001468A	Breast
HMF003427	HMF003427A	Breast
HMF002200	HMF002200A	Ovary
HMF002233	HMF002233A	Breast
HMF000833	HMF000833A	Colorectal
HMF003682	HMF003682A	Colorectal
HMF001886	HMF001886A	Kidney
HMF003021	HMF003021A	Urinary tract
HMF002521	HMF002521A	Breast
HMF003187	HMF003187A	Colorectal
HMF002412	HMF002412A	Breast
HMF000041	HMF000041A	Colorectal
HMF001052	HMF001052A	Skin
HMF000849	HMF000849A	Urinary tract
HMF000435	HMF000435A	Breast
HMF001284	HMF001284A	Colorectal
HMF003730	HMF003730A	Breast
HMF001379	HMF001379B	Colorectal
HMF003291	HMF003291A	Breast
HMF003414	HMF003414A	Breast
HMF003408	HMF003408A	Lung
HMF001174	HMF001174A	Breast
HMF002138	HMF002138A	Colorectal
HMF002624	HMF002624A	Kidney
HMF001836	HMF001836A	Breast
HMF002515	HMF002515A	Colorectal
HMF003337	HMF003337A	Breast
HMF004138	HMF004138A	Colorectal
HMF004110	HMF004110A	Kidney
HMF004083	HMF004083A	Prostate
HMF004044	HMF004044A	Prostate
HMF001116	HMF001116A	NET
HMF000155	HMF000155A	Stomach
HMF002685	HMF002685A	Biliary
HMF002788	HMF002788B	NET
HMF000452	HMF000452A	Breast
HMF003558	HMF003558A	Colorectal
HMF003607	HMF003607A	Skin
HMF003691	HMF003691A	Breast
HMF001586	HMF001586A	Lung
HMF002016	HMF002016A	Ovary
HMF002961	HMF002961A	NET
HMF002826	HMF002826A	Biliary
HMF003331	HMF003331A	Breast
HMF001525	HMF001525A	NET
HMF003463	HMF003463A	Urinary tract
HMF001005	HMF001005A	Colorectal
HMF000264	HMF000264A	Colorectal
HMF000134	HMF000134A	Kidney
HMF001872	HMF001872A	Colorectal
HMF002514	HMF002514A	Skin
HMF004165	HMF004165A	Skin
HMF002745	HMF002745A	Unknown
HMF003372	HMF003372A	Lung
HMF001589	HMF001589A	Ovary
HMF001775	HMF001775A	Breast
HMF003274	HMF003274A	Pancreas
HMF000767	HMF000767A	Skin
HMF002621	HMF002621A	Unknown
HMF001018	HMF001018A	Lymphoid
HMF003521	HMF003521A	Pancreas
HMF001953	HMF001953A	Kidney
HMF000540	HMF000540A	Lung
HMF003522	HMF003522A	Colorectal
HMF002523	HMF002523A	Pancreas
HMF003563	HMF003563A	Breast
HMF000927	HMF000927A	Liver
HMF000561	HMF000561A	Skin
HMF000631	HMF000631A	Kidney
HMF002851	HMF002851A	Lymphoid
HMF001901	HMF001901A	NET
HMF003713	HMF003713A	Colorectal
HMF003019	HMF003019A	Lymphoid
HMF000747	HMF000747A	Colorectal
HMF003729	HMF003729A	Colorectal
HMF001802	HMF001802A	Breast
HMF002654	HMF002654A	Ovary
HMF000101	HMF000101A	Breast
HMF001945	HMF001945B	Breast
HMF000695	HMF000695A	Esophagus
HMF001686	HMF001686A	Kidney
HMF000867	HMF000867A	Breast
[truncated: 4,067 more rows]

## Sheet: b
GRCH37.75 / Hg19 coordinates of DDR genes included in this study. For each gene we summarised the number of samples with biallelic and monoallelic LOF events in HMF and PCAWG
GENE	CHROM	Gene_start	Gene_end	No. of monoallelic mutated patients in HMF	No. of biallelic mutated patients in HMF	No. of monoallelic mutated patients in PCAWG	No. of biallelic mutated patients in PCAWG
ABCC1	16	16043434	16236931	47	3	37	4
ABL1	9	133589333	133763062	12	4	26	5
ACD	16	67691415	67694713	2	0	0	1
ACTB	7	5566782	5603415	3	2	15	3
ACTL6A	3	179280668	179306196	1	0	4	1
ACTR1A	10	104238986	104262482	5	1	8	2
ACTR5	20	37377085	37400834	0	0	23	1
ACTR8	3	53901093	53916229	10	5	30	6
AEN	15	89164527	89175513	3	2	13	3
AHCYL1	1	110527308	110566357	5	1	6	2
ALKBH1	14	78138747	78174363	5	1	8	2
ALKBH2	12	109525996	109531436	1	0	1	1
ALKBH3	11	43902361	43941816	10	0	21	1
AMN1	12	31824071	31882108	1	0	2	1
ANAPC15	11	71817424	71823826	0	0	0	1
ANAPC2	9	140069236	140082989	4	5	22	6
ANKRD17	4	73939093	74124515	7	8	40	9
ANKRD28	3	15708743	15901278	9	3	17	4
ANKRD44	2	197831741	198175897	9	7	46	8
ANKRD52	12	56631591	56652175	10	2	13	3
APEX1	14	20923350	20925927	4	1	11	2
APEX2	X	55026790	55035490	5	4	9	5
APITD1	1	10490159	10512210	0	0	0	1
APLF	2	68694693	68858004	4	1	27	2
APTX	9	32972604	33025166	4	6	15	7
AR	X	66764465	66950461	54	11	18	12
ARID1A	1	27022524	27108595	102	45	125	46
ARID1B	6	157099063	157531913	37	13	44	14
ARID2	12	46123448	46301823	42	15	79	16
ARID3A	19	925781	975939	6	2	11	3
ARPC4	3	9834179	9849410	0	0	1	1
ASCC1	10	73856278	73976892	0	2	7	3
ASCC3	6	100956070	101329248	28	9	61	10
ASF1A	6	119215384	119230332	2	0	1	1
ASF1B	19	14230321	14247768	0	2	5	3
ASH2L	8	37962760	38001594	8	11	58	12
ASNA1	19	12847953	12859137	7	0	4	1
ATAD5	17	29158988	29222887	20	4	16	5
ATF2	2	175936978	176033110	3	1	8	2
ATM	11	108093211	108239829	110	70	185	71
ATR	3	142168077	142297668	15	3	32	4
ATRIP	3	48488114	48507115	9	3	17	4
ATRX	X	76760356	77041702	40	37	51	38
ATXN3	14	92524896	92572965	13	1	9	2
ATXN7L3	17	42269173	42277481	0	2	12	3
AUNIP	1	26158414	26185903	14	0	2	1
BABAM1	19	17378159	17392058	2	0	6	1
BAP1	3	52435029	52444366	61	20	33	21
BARD1	2	215590370	215674428	4	2	18	3
BAZ1A	14	35221937	35344853	3	4	19	5
BAZ1B	7	72854728	72936608	3	0	14	1
BBC3	19	47724081	47736023	1	1	15	2
BCAS2	1	115110178	115124260	0	0	9	1
BCL2	18	60790579	60987361	2	2	5	3
BCL2L1	20	30252255	30311792	0	0	2	1
BCL2L11	2	111876955	111926024	1	1	6	2
BCL3	19	45250962	45263301	1	0	5	1
BEND3	6	107386386	107436473	8	3	16	4
BLM	15	91260558	91358859	11	2	25	3
BMPR2	2	203241659	203432474	6	2	21	3
BOD1L1	4	13570362	13629347	17	7	46	8
BRCA1	17	41196312	41277500	25	13	32	14
BRCA2	13	32889611	32973805	60	26	70	27
BRCC3	X	154299695	154351349	5	1	5	2
BRD1	22	50166931	50221160	8	3	22	4
BRD4	19	15347647	15443356	9	4	20	5
BRD7	16	50347398	50402845	6	9	17	10
BRE	2	28112808	28561768	3	4	24	5
BRIP1	17	59758627	59940882	20	9	54	10
BRMS1	11	66104804	66112596	3	0	7	1
BTG2	1	203274619	203278730	0	1	9	2
C17orf53	17	42219274	42239844	0	2	9	3
C17orf70	17	79506911	79520987	2	0	9	1
C19orf40	19	33463115	33469128	1	0	6	1
C1orf86	1	2115903	2144159	1	0	0	1
C20orf196	20	5731039	5844558	0	0	9	1
C7orf49	7	134777115	134855547	0	0	0	1
C9orf142	9	139886870	139888436	0	0	4	1
CABIN1	22	24407642	24574596	32	11	56	12
CALM3	19	47104331	47114050	0	0	0	1
CAPZA1	1	113161795	113214241	2	1	9	2
CAPZB	1	19665267	19812066	1	2	7	3
CBX1	17	46147414	46178883	1	0	1	1
CCAR1	10	70480769	70552134	13	5	30	6
CCNA1	13	37005967	37017019	5	7	41	8
CCNA2	4	122737599	122745087	1	0	4	1
CCNB1	5	68462837	68474072	2	0	1	1
CCNB2	15	59397277	59417244	4	2	17	3
CCNB3	X	49967364	50094909	4	2	3	3
CCNC	6	99990256	100016849	3	0	2	1
CCND1	11	69455855	69469242	6	0	5	1
CCND2	12	4382938	4414516	3	0	7	1
CCND3	6	41902671	42018095	1	2	11	3
CCNE1	19	30302805	30315215	2	0	3	1
CCNF	16	2479395	2508855	10	2	19	3
CCNH	5	86687311	86708836	0	4	18	5
CCNO	5	54526980	54529508	5	1	10	2
CDC25A	3	48198636	48229892	3	2	8	3
CDC25B	20	3767578	3786762	17	1	14	2
CDC25C	5	137620954	137674044	0	0	2	1
CDC5L	6	44355262	44418163	5	3	13	4
CDC6	17	38443885	38459171	2	4	15	5
CDCA5	11	64833772	64851636	0	0	3	1
CDIP1	16	4560676	4588829	3	0	0	1
CDK10	16	89747145	89762772	7	1	13	2
CDK12	17	37617764	37721160	26	7	30	8
CDK2	12	56360553	56366568	2	0	4	1
CDK4	12	58141510	58149796	4	1	7	2
CDK7	5	68530668	68573250	28	1	4	2
CDKN1A	6	36644305	36655116	2	3	16	4
CDKN2A	9	21967751	21995300	102	53	67	54
CDKN2D	19	10677138	10679735	0	0	0	1
CDYL	6	4706393	4955785	2	4	14	5
CELF1	11	47487496	47587121	2	0	4	1
CENPC	4	68337521	68411324	3	0	5	1
CENPO	2	25016005	25045245	2	2	37	3
CETN2	X	151995517	151999321	2	1	2	2
CHAF1A	19	4402659	4445015	1	0	5	1
CHEK1	11	125495036	125546150	1	2	8	3
CHEK2	22	29083731	29138410	17	5	15	6
CHERP	19	16628700	16653341	3	0	7	1
CHRAC1	8	141521397	141527236	0	0	2	1
CHTF18	16	838046	850737	7	2	42	3
CHTF8	16	69151913	69166487	4	0	5	1
CIB1	15	90773207	90777279	4	1	7	2
CIRBP	19	1259384	1274879	0	0	1	1
CLASP2	3	33537737	33759848	10	13	60	14
CLK2	HSCHR1_2_CTG31	155248063	155263686	0	0	0	1
CLSPN	1	36185819	36235568	7	7	42	8
CNOT1	16	58553855	58663790	15	7	29	8
CNOT10	3	32726637	32815367	4	13	49	14
CNOT2	12	70636774	70748773	0	0	3	1
CNOT3	19	54641444	54659419	3	0	14	1
CNOT7	8	17086737	17104387	2	0	2	1
COPS2	15	49398268	49447858	4	0	6	1
COPS3	17	17150141	17184607	8	1	2	2
COPS4	4	83955600	83996971	1	3	24	4
COPS5	8	67955314	67996018	1	1	2	2
COPS6	7	99686577	99689823	1	0	3	1
COPS7A	12	6832907	6841041	0	1	3	2
COPS7B	2	232646381	232673963	0	0	2	1
COPS8	2	237993955	238009109	0	0	0	1
CPSF4	7	99036545	99054994	0	0	1	1
CREB1	2	208394461	208468155	1	0	6	1
CRY1	12	107385142	107487607	4	0	7	1
CRY2	11	45868669	45904798	3	2	10	3
CSNK1D	17	80196899	80231607	0	0	6	1
CSNK1E	22	38686697	38794527	3	0	9	1
CSNK2A2	16	58191811	58231824	4	0	3	1
CTC1	17	8130191	8151362	15	3	12	4
CTNNBL1	20	36322408	36500531	0	0	8	1
CUL1	7	148395006	148498128	34	1	7	2
CUL3	2	225334867	225450110	2	2	15	3
CUL4A	13	113862552	113919399	3	1	9	2
CUL4B	X	119658464	119709649	13	3	6	4
CUL5	11	107879459	107978503	10	3	9	4
CWC27	5	64064757	64314590	2	3	14	4
CXorf57	X	105855160	105922672	4	3	4	4
CXXC1	18	47808713	47814674	4	0	6	1
DAXX	HSCHR6_MHC_SSTO	33436114	33436396	0	0	0	1
DAZAP1	19	1407568	1435719	4	1	4	2
DBF4	7	87505531	87538856	1	1	7	2
DCLRE1A	10	115594488	115614142	8	4	35	5
DCLRE1B	1	114447763	114456708	4	0	4	1
DCLRE1C	10	14939358	14996431	1	2	27	3
DCP2	5	112312399	112356667	0	0	9	1
DCPS	11	126173647	126215644	5	2	26	3
DDB1	11	61066923	61110068	2	0	21	1
DDB2	11	47236493	47260767	2	1	8	2
DDIT4L	4	101107027	101111939	1	2	20	3
DDX11	12	31226779	31257725	6	2	29	3
DDX42	17	61850963	61896677	4	1	19	2
DDX5	HG183_PATCH	62576980	62585072	0	0	0	1
DHX35	20	37590942	37668366	6	1	42	2
DHX36	3	153990335	154042286	3	3	25	4
DHX9	1	182808504	182856886	0	2	16	3
DKC1	X	153991031	154005964	1	2	5	3
DLGAP5	14	55614830	55658396	1	0	7	1
DMAP1	1	44679127	44686353	3	1	7	2
DMC1	22	38914954	38966291	13	0	8	1
DNA2	10	70173821	70231879	7	4	21	5
DNAJC8	1	28525967	28559536	0	0	5	1
DNMT1	19	10244021	10341962	2	1	17	2
DNTT	10	98064085	98098321	12	3	16	4
DNTTIP1	20	44420576	44440066	0	0	14	1
DONSON	21	34931848	34961014	6	3	25	4
DOT1L	19	2164148	2232577	16	7	28	8
DSCC1	8	120846216	120868250	8	1	19	2
DUT	15	48623208	48635570	1	0	4	1
DYRK1A	21	38738092	38889753	10	1	16	2
EID3	12	104697517	104698980	1	1	5	2
ELAVL1	19	8023463	8070543	2	1	3	2
ELL	19	18553473	18632937	3	1	9	2
EME1	17	48450581	48458844	8	8	35	9
EME2	16	1823208	1831709	1	0	7	1
ENDOV	17	78388965	78411886	9	3	25	4
ENY2	8	110346553	110358182	0	0	3	1
EP300	22	41487790	41576081	40	11	64	12
EPC1	10	32556679	32667726	3	0	8	1
ERCC1	19	45910591	45982086	42	1	9	2
ERCC2	19	45853095	45874176	26	4	34	5
ERCC3	2	128014866	128051752	4	1	17	2
ERCC4	16	14014014	14046202	15	2	60	3
ERCC5	13	103497194	103528345	3	0	10	1
ERCC6	10	50663414	50747584	11	5	62	6
ERCC6L2	9	98637983	98776842	10	1	9	2
ERCC8	5	60169658	60240900	4	0	7	1
EREG	4	75230860	75254468	1	0	4	1
ESCO1	18	19109242	19180845	7	1	13	2
ESCO2	8	27629466	27670157	7	5	11	6
ESR1	6	151977826	152450754	48	2	16	3
ETAA1	2	67624451	67637677	4	0	12	1
EXO1	1	242011269	242058450	15	5	78	6
EXO5	1	40974413	40982228	2	0	8	1
EYA1	8	72109668	72274467	4	4	47	5
EYA3	1	28296855	28415207	3	0	8	1
FAM175A	4	84382092	84444501	11	7	32	8
FAM35A	10	88853918	88951225	4	0	3	1
FAN1	15	31196055	31235311	10	4	31	5
FANCA	16	89803957	89883065	5	3	13	4
FANCB	X	14861529	14891191	2	1	3	2
FANCC	9	97861336	98079991	13	6	34	7
FANCD2	3	10068098	10143614	10	6	20	7
FANCE	6	35420138	35434880	2	2	16	3
FANCF	11	22644079	22647387	0	0	4	1
FANCG	9	35073832	35080013	4	2	9	3
FANCI	15	89787180	89860492	7	3	51	4
FANCL	2	58386378	58468507	6	1	11	2
FANCM	14	45605143	45670093	18	12	42	13
FBXO18	10	5931535	5979556	0	1	10	2
FBXW7	4	153242410	153457253	28	14	40	15
FEN1	11	61560109	61564716	2	0	5	1
FIGNL1	7	50511831	50518088	6	1	34	2
FKBPL	HSCHR6_MHC_COX	32044940	32046524	0	0	0	1
FLCN	17	17115526	17140502	27	9	22	10
FOXM1	12	2966847	2986206	2	2	25	3
FOXN3	14	89591215	90085493	5	3	9	4
FXR1	3	180585929	180700541	3	11	59	12
FZR1	19	3506271	3538328	3	4	14	5
GADD45A	1	68150744	68154021	0	0	0	1
GADD45G	9	92219928	92221470	3	0	2	1
GAR1	4	110736666	110745893	1	1	4	2
GATAD1	7	92076767	92088150	0	0	3	1
GATAD2A	19	19496635	19619740	2	1	12	2
GEN1	2	17935125	17966632	9	0	11	1
GMFB	14	54941202	54955914	0	2	7	3
GPATCH1	19	33571786	33621448	7	2	27	3
GPS1	17	80008567	80015346	5	1	5	2
GRB2	17	73314157	73401790	1	1	6	2
GTF2F1	19	6379580	6393992	6	3	31	4
GTF2H1	11	18343842	18388591	0	0	10	1
GTF2H2	5	70330784	70363516	5	0	1	1
GTF2H3	12	124118375	124147153	1	0	2	1
GTF2H4	HSCHR6_MHC_DBB	30866676	30872598	0	0	0	1
GTF2H5	6	158589384	158620376	2	0	2	1
H2AFX	11	118964564	118966177	1	2	4	3
H2AFZ	4	100869243	100871545	0	1	1	2
HAUS3	4	2229191	2243891	7	0	3	1
HAUS5	19	36103646	36116251	1	2	17	3
HELB	12	66696325	66737423	4	2	26	3
HELQ	4	84328496	84377009	8	2	14	3
HERC2	15	28356186	28567298	43	16	70	17
HES1	3	193853934	193856521	3	2	42	3
HFM1	1	91726323	91870426	16	8	65	9
HINFP	11	118992297	119006752	5	7	40	8
HIRA	22	19318221	19435224	6	1	18	2
HIST1H1B	6	27834570	27835359	1	2	4	3
HIST1H1C	6	26055968	26056699	5	1	14	2
HLTF	3	148747914	148804341	2	1	16	2
HMCES	3	128997671	129025029	0	0	9	1
HMGB1	13	31032884	31191734	0	0	0	1
HMGB2	4	174252846	174256276	1	0	2	1
HNRNPU	1	245014468	245027844	3	3	18	4
HRAS	11	532242	537287	16	7	7	8
HSF1	HG243_PATCH	145346494	145369625	0	0	0	1
HSP90AB1	6	44214824	44221620	2	1	19	2
HSPA8	11	122928197	122933938	6	3	8	4
HUS1	7	47735328	48019178	0	0	5	1
HUS1B	6	655939	656963	0	1	2	2
HUWE1	X	53559057	53713673	49	12	37	13
IDH1	2	209100951	209130798	3	0	40	1
IGF1	12	102789645	102874423	1	0	0	1
IGHMBP2	11	68671310	68708070	9	2	18	3
ING4	12	6759446	6772314	3	0	2	1
INO80	15	41271078	41408552	15	8	47	9
INO80B	2	74682150	74688011	2	0	5	1
IP6K3	6	33689444	33714762	7	3	16	4
JMJD6	17	74708919	74722866	4	2	13	3
KANSL2	12	49047184	49076021	0	0	10	1
KANSL3	2	97258907	97308524	3	3	34	4
KAT2A	HG185_PATCH	40269360	40277610	0	0	0	1
KAT5	11	65479467	65487075	1	1	8	2
KDM1A	1	23345941	23410182	8	9	44	10
KDM5A	12	389295	498620	5	8	49	9
KDM8	16	27214807	27233089	1	0	9	1
KIF18A	11	28042167	28129855	1	0	9	1
KIF4A	X	69509879	69640682	3	5	6	6
KMT2D	12	49412758	49453557	61	34	174	35
KPNA2	HG747_PATCH	66031635	66042958	0	0	0	1
LCMT1	16	25123050	25189552	5	1	10	2
LEO1	15	52230222	52264003	2	2	9	3
LIG1	19	48618702	48673860	14	4	36	5
LIG3	17	33307513	33332083	4	1	27	2
LIG4	13	108859787	108870716	6	5	16	6
LRRK2	12	40590546	40763087	22	8	101	9
LRWD1	7	102105376	102113615	2	0	10	1
MAD2L2	1	11734537	11751707	1	1	5	2
MAP2K7	19	7968728	7979363	26	8	18	9
MAPK1	22	22108789	22221970	3	1	5	2
MAPK14	6	35995488	36079013	1	1	5	2
MAU2	19	19431490	19469563	1	1	8	2
MBD4	3	129149787	129158878	0	0	6	1
MCM10	10	13203554	13253104	4	2	22	3
MCM6	2	136597196	136633996	9	3	27	4
MCM8	20	5931298	5975852	13	6	71	7
MCM9	6	119134605	119256327	21	15	43	16
MCPH1	8	6264113	6501144	11	7	19	8
MCRS1	12	49950327	49961936	1	0	12	1
MDC1	HSCHR6_MHC_APD	30675831	30693912	0	0	0	1
MDM2	12	69201956	69239214	0	0	4	1
MDM4	1	204485511	204542871	4	0	3	1
MED1	17	37560538	37607539	15	4	24	5
MEN1	11	64570982	64578766	24	31	39	32
METAP2	12	95867296	95909615	2	1	4	2
MGMT	10	131265448	131566271	0	0	4	1
MLH1	3	37034823	37107380	52	29	89	30
MLH3	14	75480467	75518235	6	4	25	5
MMS19	10	99218081	99258551	15	3	25	4
MMS22L	6	97590037	97731093	11	1	28	2
MNAT1	14	61201460	61436671	6	0	5	1
MND1	4	154265801	154336270	1	4	23	5
MORF4L1	15	79102829	79190475	3	0	4	1
MPG	16	127006	135852	4	3	25	4
MPHOSPH8	13	20207788	20247599	3	4	8	5
MPLKIP	7	40165622	40174258	0	0	6	1
MRE11A	11	94152895	94227074	5	3	18	4
MRPL40	22	19419425	19423598	1	0	4	1
MSH2	2	47630108	47789450	9	1	24	2
MSH3	5	79950467	80172279	8	4	28	5
MSH4	1	76262567	76378923	9	7	56	8
MSH5	HSCHR6_MHC_SSTO	31697728	31720408	0	0	0	1
MSH6	2	47922669	48037240	17	4	31	5
MSL1	17	38278551	38293042	2	1	6	2
MTA2	11	62360686	62369312	4	1	11	2
MTOR	1	11166592	11322564	26	8	43	9
MUS81	11	65624597	65635124	5	2	46	3
MUTYH	1	45794835	45806142	21	9	56	10
MVP	16	29831715	29859355	9	7	54	8
MYBBP1A	17	4442192	4458926	77	48	119	49
N6AMT1	21	30244513	30257693	0	1	16	2
NAA50	3	113435307	113465147	0	0	6	1
NABP1	2	192542794	192561385	0	0	4	1
NABP2	12	56615799	56623638	9	1	12	2
NACC2	9	138898383	138987131	1	2	4	3
NAE1	16	66836778	66907159	2	3	13	4
NAP1L4	11	2965667	3013607	0	1	5	2
NASP	1	46049518	46084566	10	2	15	3
NBN	8	90945564	91015456	3	1	25	2
NCAPD2	12	6602522	6641121	11	5	58	6
NCAPD3	11	134020014	134095348	11	5	20	6
NCAPG	4	17812525	17846485	13	10	68	11
NCAPG2	7	158424003	158497520	3	6	52	7
NDNL2	15	29560353	29562033	3	1	2	2
NEIL1	15	75639296	75647592	7	4	21	5
NEIL2	8	11627148	11644855	3	4	10	5
NEIL3	4	178230990	178284097	4	5	26	6
NEK2	1	211836114	211848960	0	0	4	1
NFATC2IP	16	28962128	28978418	0	0	3	1
NFKBIA	14	35870717	35873955	8	5	16	6
NFRKB	11	129733531	129765485	12	2	35	3
NHEJ1	2	219940039	220025587	0	0	5	1
NHP2	5	177576461	177580968	0	1	11	2
NONO	X	70503042	70521018	19	8	13	9
NOP10	15	34633917	34635378	0	0	0	1
NPHP1	2	110879888	110962643	4	1	13	2
NPLOC4	17	79523913	79615495	4	1	7	2
NPM1	5	170814120	170838141	0	0	4	1
NSD1	5	176560026	176727216	14	3	26	4
NSMCE1	16	27236312	27280115	0	1	5	2
NSMCE2	8	126103921	126379362	1	0	11	1
NSMCE4A	10	123716603	123734732	4	1	8	2
NTHL1	16	2089816	2097867	5	6	24	7
NUDT1	7	2281857	2290781	0	1	3	2
NUDT15	13	48611703	48621358	3	0	2	1
NUDT18	8	21964383	21966932	8	2	5	3
OBFC1	10	105642300	105677963	2	0	9	1
OGG1	3	9791628	9829903	28	14	46	15
OLA1	2	174937175	175113426	0	2	8	3
ORC2	2	201773696	201828403	1	1	18	2
ORC6	16	46723555	46732306	0	2	9	3
OTUB1	11	63753325	63769283	0	0	2	1
PAGR1	16	29827285	29841948	2	0	3	1
PALB2	16	23614488	23652631	6	1	34	2
PAPD7	5	6714718	6757161	1	1	8	2
PARG	10	51026325	51130715	3	0	6	1
PARP1	1	226548392	226595780	3	1	19	2
PARP2	14	20811741	20826064	2	2	22	3
PARP3	3	51976361	51982883	9	9	29	10
PARP4	13	24995064	25086948	21	9	63	10
PARPBP	12	102513956	102591298	4	1	18	2
PAXIP1	7	154735397	154794794	4	1	7	2
PBRM1	3	52579368	52719933	75	56	86	57
PCBP1	2	70314585	70316332	2	0	8	1
PCGF1	2	74732170	74735707	2	0	1	1
PCNA	20	5095599	5107272	0	0	3	1
PDCD10	3	167401086	167452727	1	1	2	2
PDS5A	4	39824483	39979576	11	19	54	20
PDS5B	13	33160564	33352157	13	19	59	20
PER1	17	8043790	8059824	47	16	42	17
PER2	2	239152679	239198743	7	1	7	2
PER3	1	7844380	7905237	32	26	33	27
PFN1	17	4848947	4852356	10	1	3	2
PIAS1	15	68346517	68483096	4	2	5	3
PIAS2	18	44388353	44500123	5	4	10	5
PIAS3	1	145575233	145586546	2	0	17	1
PIAS4	19	4007644	4039384	2	0	4	1
PIF1	15	65107831	65117867	13	8	72	9
PIH1D1	19	49949555	49956754	0	0	10	1
PINX1	8	10622473	10697394	0	1	2	2
PITPNM1	11	67259239	67273734	11	3	20	4
PLK3	1	45265897	45271662	12	1	20	2
PLRG1	4	155456158	155471587	2	1	6	2
PMS1	2	190649107	190742355	4	5	50	6
PMS2	7	6012870	6048756	7	6	47	7
PMS2P5	7	74306894	74366314	0	0	0	1
PNKP	19	50364461	50371166	5	1	33	2
POLA1	X	24712036	25015103	10	2	14	3
POLA2	11	65029233	65073060	3	4	24	5
POLB	8	42195972	42229326	0	3	9	4
POLD1	19	50887461	50921273	8	6	42	7
POLD2	7	44154286	44163957	0	0	10	1
POLD3	11	74204896	74380162	2	1	13	2
POLD4	11	67118248	67124443	0	0	5	1
POLE	12	133200348	133263951	18	5	64	6
POLE2	14	50110273	50155140	4	2	15	3
POLE3	9	116169515	116172952	2	0	2	1
POLE4	2	75185619	75197255	2	1	5	2
POLG	15	89859534	89878092	53	3	67	4
POLG2	HG183_PATCH	62555145	62574426	0	0	0	1
POLH	6	43543887	43586701	2	1	14	2
POLI	18	51795774	51847636	5	4	11	5
POLK	5	74807581	74896969	13	4	20	5
POLL	10	103338639	103348027	13	7	32	8
POLM	7	44111846	44122139	1	0	5	1
POLN	4	2073645	2243848	16	4	21	5
POLQ	3	121150278	121264853	17	6	87	7
POLR2A	17	7387685	7417933	17	9	25	10
POLR2B	4	57843888	57897334	10	6	24	7
POLR2C	16	57496299	57505922	1	1	9	2
POLR2D	2	128603840	128615731	0	0	5	1
POLR2E	19	1086594	1095598	1	2	18	3
POLR2F	22	38348614	38437922	3	1	5	2
POLR2G	11	62529016	62534182	0	0	0	1
POLR2H	3	184079506	184086384	1	0	4	1
POLR2I	19	36604612	36606248	1	1	1	2
POLR2J	7	102113565	102119354	1	0	0	1
POLR2K	8	101162812	101166230	0	0	2	1
POLR2L	11	837356	842545	0	0	1	1
POT1	7	124462440	124570037	9	3	33	4
PPARG	3	12328867	12475855	2	1	8	2
PPIE	1	40157854	40229586	3	0	6	1
PPIL1	6	36822603	36842800	0	0	5	1
PPP1CA	11	67165654	67188654	2	0	1	1
PPP1CC	12	111157485	111180744	1	0	6	1
PPP2CA	5	133530025	133561833	0	0	6	1
PPP4C	16	30087299	30096698	0	0	4	1
PPP4R1	18	9546789	9615238	1	2	20	3
PPP4R2	3	73045936	73118350	3	2	24	3
PPP4R4	14	94612465	94746072	5	7	35	8
PPP5C	19	46850251	46896238	0	1	8	2
PPP6C	9	127908852	127952218	12	3	7	4
PPP6R1	19	55741148	55770363	19	3	56	4
PPP6R2	22	50781733	50883514	17	2	11	3
PPP6R3	11	68228186	68382802	6	0	21	1
PRIM1	12	57125380	57146157	1	1	12	2
PRIMPOL	4	185570767	185616117	5	6	23	7
PRKDC	8	48685669	48872743	18	6	62	7
PRPF19	11	60658202	60674060	3	1	7	2
PRPF39	14	45553302	45585485	0	1	7	2
PSMB6	17	4699439	4701790	4	1	2	2
PSME3	17	40976402	40995774	2	0	3	1
PTBP1	19	797075	812327	0	0	2	1
PTEN	10	89622870	89731687	168	69	85	70
PUF60	8	144898514	144912029	2	0	6	1
RAD1	5	34905369	34919094	0	2	7	3
RAD17	5	68665120	68710628	4	6	34	7
RAD18	3	8817088	9005457	5	1	7	2
RAD21	8	117858174	117887105	4	1	26	2
RAD23A	19	13056669	13064456	2	2	7	3
RAD23B	9	110045418	110094475	3	1	2	2
RAD50	5	131891711	131980313	33	11	68	12
RAD51	15	40986972	41024354	1	2	8	3
RAD51AP1	12	4647950	4669214	0	0	0	1
RAD51B	14	68286496	69196935	9	0	15	1
RAD51C	17	56769934	56811703	1	3	23	4
RAD51D	17	33426811	33448541	2	0	3	1
RAD52	12	1021243	1099219	0	2	10	3
RAD54B	8	95384188	95487337	2	0	18	1
RAD54L	1	46713360	46744145	12	9	46	10
RAD9A	11	67159176	67165881	1	1	15	2
RAD9B	12	110939460	110969891	3	0	5	1
RASSF7	11	560404	564021	14	1	7	2
RB1	13	48877887	49056122	186	47	82	48
RBBP8	18	20378224	20606451	7	0	19	1
RBM38	20	55966463	55984389	0	0	1	1
RBX1	22	41347351	41369313	0	0	0	1
RDM1	17	34245070	34257777	2	0	1	1
RECQL	12	21621845	21654603	4	4	20	5
RECQL4	8	145736667	145743229	13	4	59	5
RECQL5	17	73622925	73663269	13	4	49	5
REV1	2	100016938	100106497	2	1	17	2
REV3L	6	111620234	111804918	23	7	50	8
RFC1	4	39289076	39367995	7	4	19	5
RFC2	7	73645829	73668774	1	0	12	1
RFC3	13	34392186	34540695	4	4	14	5
RFC4	3	186507669	186524847	1	2	29	3
RFC5	12	118451393	118470935	0	1	5	2
RFWD3	16	74655292	74700779	3	3	9	4
RHNO1	12	2985424	2998626	2	2	20	3
RIF1	2	152266397	152364527	6	2	30	3
RMI1	9	86595626	86618985	4	0	7	1
RMI2	16	11343476	11445619	1	0	0	1
RNASEH2A	19	12917394	12924452	2	1	14	2
RNASEH2B	13	51483814	51544592	13	6	23	7
RNASEH2C	11	65482367	65488418	0	0	2	1
RNF111	15	59157374	59389618	19	6	31	7
RNF113A	X	119004497	119005791	3	2	3	3
RNF168	3	196195654	196230639	4	0	3	1
RNF169	11	74459913	74553458	4	2	17	3
RNF4	4	2463947	2627047	3	1	3	2
RNF8	6	37321748	37362514	3	3	25	4
RNMT	18	13726659	13764557	0	1	7	2
RPA1	17	1732996	1803376	11	0	9	1
RPA2	1	28218035	28241257	1	0	0	1
RPA3	7	7676149	7758238	0	0	2	1
RPA4	X	96138907	96140446	0	0	0	1
RPAIN	17	5322961	5336196	1	0	1	1
RPRD1B	20	36661948	36720768	2	0	5	1
RPRD2	1	150335567	150449042	3	3	32	4
RPS27L	15	63418071	63450220	0	0	3	1
RPS6KA6	X	83318984	83442933	21	11	18	12
RREB1	6	7107830	7252213	10	12	47	13
RRM1	11	4115937	4160106	6	2	12	3
RRM2	2	10262455	10271545	0	0	7	1
RRM2B	8	103216730	103251346	2	0	3	1
RTEL1	20	62289163	62328416	3	0	10	1
RTFDC1	20	55043647	55093943	1	0	7	1
RUNX1	21	36160098	37376965	12	3	11	4
RUVBL1	3	127783621	127872757	0	1	4	2
RUVBL2	19	49496705	49519252	1	2	11	3
SAMHD1	20	35518632	35580246	3	2	14	3
SART1	11	65729160	65747299	1	0	9	1
SCNM1	1	151129140	151142773	0	1	9	2
SDCBP	8	59465483	59495419	1	0	6	1
SETD2	3	47057919	47205457	58	24	63	25
SETDB1	1	150898739	150937213	5	4	31	5
SETMAR	3	4344988	4359251	9	3	19	4
SETX	9	135136743	135230372	13	15	69	16
SF3A2	19	2236520	2248678	1	1	3	2
SFR1	10	105881816	105886143	0	1	7	2
SGOL1	3	20202085	20227784	1	0	4	1
SHFM1	7	96110938	96339203	0	0	2	1
SHPRH	6	146185381	146285559	11	7	36	8
SIN3B	19	16940211	16991164	4	3	22	4
SIRT1	10	69644427	69678147	2	1	4	2
SIRT6	19	4174106	4182601	5	1	5	2
SLBP	4	1694527	1714282	1	1	2	2
SLFN11	17	33677324	33700720	2	0	2	1
SLX1A	16	30205208	30208882	0	0	0	1
SLX1B	16	29465822	29469540	0	0	0	1
SLX4	16	3631182	3661599	2	3	14	4
SMAD4	18	48494410	48611415	111	70	76	71
SMARCA2	9	2015342	2193624	34	13	32	14
SMARCA4	19	11071598	11176071	57	8	44	9
SMARCA5	4	144434616	144478639	1	2	7	3
SMARCAD1	4	95128762	95212443	6	1	10	2
SMARCAL1	2	217277137	217347776	51	3	16	4
SMARCB1	22	24129150	24176703	8	2	18	3
SMARCC1	3	47626762	47823596	11	7	31	8
SMARCC2	12	56556767	56583351	11	4	15	5
SMARCD1	12	50478755	50494495	1	1	1	2
SMARCE1	17	38781214	38804760	11	6	26	7
SMC1A	X	53401070	53449677	19	10	14	11
SMC1B	22	45739944	45809500	7	3	21	4
SMC2	9	106856541	106903698	9	6	40	7
SMC3	10	112327449	112364394	5	2	13	3
SMC4	3	160117062	160152750	6	3	40	4
SMC5	9	72873937	72969804	6	1	20	2
SMC6	2	17845079	17981509	10	0	16	1
SMEK2	2	55774428	55846015	5	1	32	2
SMG6	17	1963133	2207065	28	23	44	24
SMG7	1	183441351	183567381	6	3	47	4
SMUG1	12	54558529	54582778	4	4	32	5
SNAI2	8	49830249	49834299	1	0	4	1
SNRNP40	1	31732417	31769662	2	0	5	1
SNRPA	19	41256542	41271294	2	1	3	2
SNRPB2	20	16710606	16722421	0	0	6	1
SOD1	21	33031935	33041244	1	0	0	1
SOD2	6	160090089	160183561	3	0	0	1
SOX4	6	21593972	21598847	1	0	4	1
SOX9	17	70117161	70122561	22	2	15	3
SPO11	20	55904815	55919050	2	0	10	1
SPRTN	1	231472850	231490769	2	0	7	1
SRCAP	16	30709530	30755602	8	4	65	5
SRSF11	1	70671365	70718735	1	0	4	1
SRSF12	6	89805678	89827800	7	1	3	2
SRSF6	20	42086568	42092245	1	0	16	1
STAG1	3	136055077	136471220	6	1	13	2
STAG2	X	123094062	123556514	26	15	25	16
STOML2	9	35099888	35103154	1	2	7	3
STRA13	17	79976578	79981983	0	0	2	1
SUMO2	17	73163408	73179078	0	0	0	1
SUMO3	21	46225532	46238694	0	0	1	1
SUMO4	6	149721495	149722177	0	0	0	1
SUPT3H	6	44777054	45345690	0	3	18	4
SUPT7L	2	27873679	27886676	3	1	15	2
SUZ12	17	30264037	30328064	12	0	21	1
SWI5	9	131037658	131051269	2	0	3	1
SWSAP1	19	11485361	11487627	2	2	24	3
TADA1	1	166825747	166845564	0	0	4	1
TADA2B	4	7043626	7059679	3	2	9	3
TADA3	3	9821544	9834695	9	1	4	2
TAF11	6	34845555	34855866	1	0	0	1
TAF13	1	109605108	109618624	2	1	4	2
TAF3	10	7860467	8058590	7	0	16	1
TAOK1	17	27717482	27878922	10	2	17	3
TAOK2	16	29984962	30003582	6	2	16	3
TCEA1	8	54879112	54935089	1	0	2	1
TCEB1	8	74851404	74884522	29	0	0	1
TCEB2	16	2821415	2827298	1	0	0	1
TCEB3	1	24069645	24088549	20	6	33	7
TDG	12	104359582	104382652	9	0	7	1
TDP1	14	90421283	90511106	3	2	23	3
TDP2	6	24650205	24667261	0	1	8	2
TELO2	16	1543345	1560458	3	3	26	4
TEN1	17	73975301	73996667	0	0	1	1
TEP1	14	20833826	20881588	45	17	97	18
TERF1	8	73921099	73960357	0	0	3	1
TERF2	16	69389464	69442474	9	3	23	4
TERF2IP	16	75681684	75795770	0	1	7	2
TERT	5	1253262	1295184	0	0	3	1
TFDP1	13	114239013	114295785	3	3	10	4
TFPT	19	54610320	54619055	0	0	4	1
TGFBR2	3	30647994	30735634	38	11	23	12
THAP7	22	21353393	21356485	7	2	21	3
THOC1	18	214520	268050	2	0	6	1
THOC6	16	3074028	3077756	8	3	9	4
THRAP3	1	36690017	36770958	4	3	20	4
TICRR	15	90118713	90174287	6	2	31	3
TIMELESS	12	56810903	56843187	18	8	67	9
TINF2	14	24708849	24711880	1	1	3	2
TIPIN	15	66628544	66679084	2	0	1	1
TIPRL	1	168148171	168169950	0	0	8	1
TLK2	17	60536019	60692842	4	2	7	3
TNKS	8	9413424	9639856	17	8	23	9
TNP1	2	217724181	217724787	0	0	1	1
TONSL	8	145654165	145669827	3	0	17	1
TOP1	20	39657458	39753127	1	2	9	3
TOP2A	17	38544768	38574202	8	4	29	5
TOP2B	3	25639475	25706398	21	6	20	7
TOP3A	17	18174742	18218321	31	24	67	25
TOP3B	22	22311397	22337213	6	3	15	4
TOPBP1	3	133317019	133380737	8	3	31	4
TP53	17	7565097	7590856	63	18	667	19		686
TP53BP1	15	43699407	43802926	28	9	44	10
TP63	3	189349205	189615068	13	0	24	1
TP73	1	3569084	3652765	7	1	6	2
TRA2B	3	185633694	185655924	1	0	2	1
TRAIP	3	49866034	49894007	5	1	12	2
TREX1	3	48506445	48509044	5	0	2	1
TREX2	X	152710178	152736045	10	5	9	6
TRIM28	19	59055458	59062089	1	1	8	2
TRIM33	1	114935399	115053781	3	0	12	1
TRIM35	8	27142404	27168836	7	0	5	1
TRIM37	17	57059999	57184282	7	0	18	1
TRIP12	2	230628554	230787955	14	5	40	6
TRIP13	5	892758	919472	0	1	4	2
TSC1	9	135766735	135820020	40	27	64	28
TSC2	16	2097466	2138716	59	11	56	12
TTI1	20	36611409	36661870	1	5	16	6
TTI2	8	33330904	33371119	3	8	24	9
TTK	6	80713604	80752244	4	3	24	4
TYMS	18	657604	673578	0	0	3	1
UBA1	X	47050260	47074527	13	6	18	7
UBA2	19	34919257	34960853	1	2	16	3
UBB	17	16284112	16286059	6	1	1	2
UBC	12	125396150	125401914	3	0	2	1
UBD	HSCHR6_MHC_QBL	29523310	29527624	0	0	0	1
UBE2A	X	118708501	118718381	2	2	4	3
UBE2B	5	133706870	133727683	0	0	1	1
UBE2C	20	44441215	44445596	0	1	28	2
UBE2N	12	93799449	93836038	0	0	2	1
UBE2NL	X	142967173	142968355	1	0	0	1
UBE2T	1	202300785	202311108	2	0	10	1
UBE2V1	20	48697661	48732496	0	0	1	1
UBE2V2	8	48920960	48977268	0	0	2	1
UBR5	8	103265240	103425069	10	3	46	4
UIMC1	5	176332006	176449634	8	2	16	3
UNG	12	109535379	109548797	7	0	9	1
UPF1	19	18942747	18979045	8	0	13	1
USP1	1	62901968	62917475	2	0	7	1
USP37	2	219314974	219433084	2	0	14	1
USP7	16	8985951	9058371	4	3	13	4
USP9X	X	40944888	41095832	49	24	37	25
UVRAG	11	75526212	75854239	3	4	47	5
UVSSA	4	1341054	1381837	3	2	7	3
VCP	9	35056061	35073246	3	0	6	1
WDHD1	14	55405668	55493823	10	4	27	5
WDR48	3	39093489	39138155	14	6	24	7
WDR83	19	12777614	12786646	1	2	7	3
WEE1	11	9595228	9615004	2	1	11	2
WRAP53	17	7589389	7606820	15	2	8	3
WRN	8	30891317	31031285	45	17	44	18
WWOX	16	78133310	79246564	43	17	55	18
XAB2	19	7684411	7694451	19	7	40	8
XPA	9	100437191	100459639	6	2	15	3
XPC	3	14186647	14220283	4	2	14	3
XRCC1	19	44047192	44084625	3	1	13	2
XRCC2	7	152341864	152373250	0	1	5	2
XRCC3	14	104163946	104181841	3	2	7	3
XRCC4	5	82373317	82649606	4	0	7	1
XRCC5	2	216972187	217071026	2	1	13	2
XRCC6	22	42017123	42060044	2	0	3	1
XRCC6BP1	HSCHR12_1_CTG2_1	58335324	58351052	0	0	0	1
XRN1	3	142025449	142166904	8	3	42	4
YBX1	1	43148098	43168020	1	1	3	2
YWHAB	20	43514317	43537173	0	0	4	1
YWHAE	17	1247566	1303672	7	3	4	4
YWHAG	7	75956116	75988348	1	0	2	1
ZFYVE19	15	41099284	41106767	4	4	28	5
ZNF207	17	30677136	30708905	2	1	8	2
ZNF451	6	56951642	57035105	9	2	14	3
ZNHIT1	7	100860949	100867471	0	0	9	1
ZRANB3	2	135894486	136288806	15	6	93	7
ZSWIM7	17	15879874	15903031	4	1	2	2
ZWINT	10	58116989	58121036	1	0	1	1

## Sheet: c
All SBS signatures, indels counts and SV counts, per sample
Donor_ID	Sample_ID	Signature.1	Signature.2	Signature.3	Signature.4	Signature.5	Signature.6	Signature.7	Signature.8	Signature.9	Signature.10	Signature.11	Signature.12	Signature.13	Signature.14	Signature.15	Signature.16	Signature.17	Signature.18	Signature.19	Signature.20	Signature.21	Signature.22	Signature.23	Signature.24	Signature.25	Signature.26	Signature.27	Signature.28	Signature.29	Signature.30	Signature.33	Signature.36	Signature.38	Signature.51	Signature.52	Signature.MMR1	Signature.MMR2	Signature.PLATINUM	Signature.N1	Signature.N2	Signature.N3	Signature.N4	Signature.N5	Signature.N6	Signature.N7	Signature.N8	Signature.N9	Signature.N10
HMF003038	HMF003038A	319.004	323.49	1964.37	0	1102.56	0	205.359	1287.98	0	0	0	571.715	1841.75	0	0	1312.9	0	408.226	0	0	0	0	0	0	0	0	0	0	0	0	0	0	0	0	0	0	0	0	0	0	0	0	0	0	0	0	0	0
HMF003354	HMF003354A	322.369	62.7396	280.033	0	0	0	0	0	87.2234	0	0	0	56.6187	0	0	618.215	0	0	0	0	91.304	0	0	0	0	0	0	0	0	0	0	0	0	0	0	0	0	0	0	0	0	0	0	0	0	0	0	0
HMF002649	HMF002649A	0	281.538	1983.96	447.925	0	0	0	1767.35	266.827	0	0	420.024	475.317	0	0	0	0	0	0	0	0	0	0	0	0	0	0	0	0	0	0	0	0	0	0	0	0	0	0	0	0	0	0	0	0	0	0	0
HMF003454	HMF003454A	998.322	1094.02	249.45	0	1128.54	0	0	290.24	0	0	162.116	0	0	0	0	0	0	0	0	0	0	0	0	0	0	0	0	0	0	0	0	0	0	0	0	0	0	0	0	0	0	0	0	0	0	0	0	0
HMF000963	HMF000963B	264.996	872.596	262.195	0	1641.36	0	0	1121.56	0	0	0	0	220.262	0	0	0	542.552	643.063	0	0	0	0	0	118.362	0	0	0	0	0	817.402	0	0	0	0	0	752.648	0	0	0	0	0	0	0	0	0	0	0	0
HMF002910	HMF002910A	309.95	220.027	99.519	0	611.574	0	0	425.701	0	0	0	0	55.5395	0	0	0	103.502	691.158	0	0	0	0	0	0	0	0	0	0	0	1082.83	0	0	0	0	0	0	0	0	0	0	0	0	0	0	0	0	0	0
HMF001561	HMF001561B	605.248	0	88.5321	0	406.678	0	0	378.703	0	0	0	0	0	0	0	0	131.614	1069.47	0	0	0	0	0	122.162	0	0	0	0	0	341.769	0	0	0	0	0	914.396	0	0	0	0	0	0	0	0	0	0	0	0
HMF000816	HMF000816A	1601.69	359.62	57.717	0	718.622	0	0	246.889	0	0	0	0	90.776	0	0	0	136.079	742.978	0	0	0	0	0	0	0	0	0	0	0	396.289	0	0	0	0	0	172.343	0	0	0	0	0	0	0	0	0	0	0	0
HMF001750	HMF001750A	750	473.483	124.205	0	295.928	0	0	531.295	0	0	0	0	119.517	0	0	0	363.072	2439	0	0	0	0	0	0	0	0	0	0	0	653.5	0	0	0	0	0	394.5	0	0	0	0	0	0	0	0	0	0	0	0
HMF000923	HMF000923A	0	3372.9	0	0	197.979	0	0	0	0	0	0	0	851.393	0	0	0	0	332.287	0	0	0	0	0	80.7786	0	0	0	0	0	1137.25	0	0	0	0	0	357.032	0	0	0	0	0	0	0	0	0	0	0	0
HMF001876	HMF001876A	352.047	150.26	28.79	0	266.782	0	0	123.152	0	0	0	0	37.9289	0	0	0	51.704	972.723	0	0	0	0	0	91.6567	0	0	0	0	0	277.566	0	0	0	0	0	0	0	0	0	0	0	0	0	0	0	0	0	0
HMF001321	HMF001321A	667.815	609.907	169.476	0	849.546	0	0	724.946	0	0	0	0	153.954	0	0	0	236.191	1384.65	0	0	0	0	0	111.328	0	0	0	0	0	1153.04	0	0	0	0	0	295.139	0	0	0	0	0	0	0	0	0	0	0	0
HMF001889	HMF001889B	243.931	391.944	296.762	0	1509.2	0	0	1269.43	0	0	0	0	98.9353	0	0	0	384.612	707.651	0	0	0	0	0	82.7834	0	0	0	0	0	982.765	0	0	0	0	0	338.989	0	0	0	0	0	0	0	0	0	0	0	0
HMF001827	HMF001827A	521.545	362.98	80.0805	0	713.956	0	0	342.551	0	0	0	0	91.624	0	0	0	215.507	878.235	0	0	0	0	0	102.638	0	0	0	0	0	866.745	0	0	0	0	0	414.139	0	0	0	0	0	0	0	0	0	0	0	0
HMF003076	HMF003076A	438.559	156.917	95.2267	0	328.337	0	0	407.34	0	0	0	0	39.6093	0	0	0	108.275	1223.16	0	0	0	0	0	97.959	0	0	0	0	0	580.578	0	0	0	0	0	177.524	0	0	0	0	0	0	0	0	0	0	0	0
HMF000148	HMF000148A	0	1514.46	664.317	0	2514.66	0	0	2841.67	0	0	0	0	382.284	0	0	0	2059.21	3346.76	0	0	0	0	0	341.211	0	0	0	0	0	1537.86	0	0	0	0	0	1441.03	0	0	0	0	0	0	0	0	0	0	0	0
HMF000245	HMF000245A	1892.57	515.538	93.862	0	689.628	0	0	401.502	0	0	0	0	130.133	0	0	0	167.272	1275.36	0	0	0	0	0	0	0	0	0	0	0	328.578	0	0	0	0	0	177.273	0	0	0	0	0	0	0	0	0	0	0	0
HMF002626	HMF002626A	753.111	441.397	76.1889	0	784.983	0	0	325.904	0	0	0	0	111.418	0	0	0	146.216	895.822	0	0	0	0	0	53.2533	0	0	0	0	0	480.208	0	0	0	0	0	337.498	0	0	0	0	0	0	0	0	0	0	0	0
HMF003424	HMF003424A	2405.57	1606.37	372.06	0	683.503	0	0	1591.52	0	0	0	0	405.483	0	0	0	838.586	3355.94	0	0	0	0	0	0	0	0	0	0	0	364.054	0	0	0	0	0	938.797	0	0	0	0	0	0	0	0	0	0	0	0
HMF003271	HMF003271A	1108.2	331.32	120.017	0	830.683	0	0	513.383	0	0	0	0	83.6322	0	0	0	233.012	1595.97	0	0	0	0	0	74.4305	0	0	0	0	0	480.287	0	0	0	0	0	369.068	0	0	0	0	0	0	0	0	0	0	0	0
HMF003572	HMF003572A	877.54	247.746	46.3098	0	730.501	0	0	198.094	0	0	0	0	62.5364	0	0	0	682.407	602.963	0	0	0	0	0	71.115	0	0	0	0	0	1116.91	0	0	0	0	0	0	0	0	0	0	0	0	0	0	0	0	0	0
HMF002440	HMF002440A	2606.27	1163.44	241.501	0	413.995	0	0	1033.04	0	0	0	0	293.678	0	0	0	507.929	1254.98	0	0	0	0	0	0	0	0	0	0	0	0	0	0	0	0	0	993.652	0	0	0	0	0	0	0	0	0	0	0	0
HMF001264	HMF001264A	6686.69	0	0	0	8763.2	0	0	0	0	0	0	0	0	0	0	0	10751.5	3805.38	0	0	0	0	0	0	0	0	0	0	0	693.434	0	0	0	0	0	0	0	0	0	0	0	0	0	0	0	0	0	0
HMF001035	HMF001035A	273.81	0	112.174	0	517.553	0	0	479.833	0	0	0	0	0	0	0	0	228.067	1310.2	0	0	0	0	0	0	0	0	0	0	0	443.881	0	0	0	0	0	441.387	0	0	0	0	0	0	0	0	0	0	0	0
HMF003426	HMF003426A	1128.91	0	125.031	0	573.806	0	0	534.831	0	0	0	0	0	0	0	0	224.568	995.538	0	0	0	0	0	60.7952	0	0	0	0	0	254.254	0	0	0	0	0	182.324	0	0	0	0	0	0	0	0	0	0	0	0
HMF002992	HMF002992A	596.421	88.5886	45.2802	0	780.278	0	0	193.69	0	0	0	0	22.3617	0	0	0	106.766	791.211	0	0	0	0	0	116.53	0	0	0	0	0	545.213	0	0	0	0	0	0	0	0	0	0	0	0	0	0	0	0	0	0
HMF001759	HMF001759A	1760.32	0	415.288	0	1037.78	0	0	1776.43	0	0	0	0	0	0	0	0	1273.24	798.362	0	0	0	0	0	0	0	0	0	0	0	606.07	0	0	0	0	0	0	0	0	0	0	0	0	0	0	0	0	0	0
HMF002507	HMF002507A	1631.78	3600.36	896.769	0	2264.81	0	0	3836.01	0	0	0	0	908.809	0	0	0	1143.76	0	0	0	0	0	0	137.132	0	0	0	0	0	942.953	0	0	0	0	0	1286.62	0	0	0	0	0	0	0	0	0	0	0	0
HMF001230	HMF001230A	396.184	331.951	380.952	0	1364.97	0	0	1629.56	0	0	0	0	83.7916	0	0	0	632.998	0	0	0	0	0	0	0	0	0	0	0	0	734.194	0	0	0	0	0	437.307	0	0	0	0	0	0	0	0	0	0	0	0
HMF002229	HMF002229A	0	7119.2	0	0	240.641	0	0	0	0	0	0	0	1797.04	0	0	0	0	0	0	0	0	0	0	98.1853	0	0	0	0	0	459.119	0	0	0	0	0	591.442	0	0	0	0	0	0	0	0	0	0	0	0
HMF000528	HMF000528A	283.973	0	96.492	0	860.276	0	0	412.753	0	0	0	0	0	0	0	0	145.673	1247.27	0	0	0	0	0	122.417	0	0	0	0	0	391.341	0	0	0	0	0	295.011	0	0	0	0	0	0	0	0	0	0	0	0
HMF001714	HMF001714A	0	4901.57	607.328	0	2181.94	0	0	2597.9	0	0	0	0	1237.26	0	0	0	2677.01	0	0	0	0	0	0	0	0	0	0	0	0	1894.77	0	0	0	0	0	1376.1	0	0	0	0	0	0	0	0	0	0	0	0
HMF002793	HMF002793A	1335.43	2268.69	100.246	0	921.126	0	0	428.81	0	0	0	0	572.667	0	0	0	822.5	687.021	0	0	0	0	0	102.304	0	0	0	0	0	443.304	0	0	0	0	0	482.92	0	0	0	0	0	0	0	0	0	0	0	0
HMF000317	HMF000317A	656.406	167.635	230.903	0	851.978	0	0	987.707	0	0	0	0	42.3147	0	0	0	343.147	1730.71	0	0	0	0	0	112.676	0	0	0	0	0	1228.63	0	0	0	0	0	184.896	0	0	0	0	0	0	0	0	0	0	0	0
HMF002072	HMF002072A	580.631	163.343	222.317	0	1383.53	0	0	950.979	0	0	0	0	41.2314	0	0	0	249.728	1141.71	0	0	0	0	0	115.658	0	0	0	0	0	801.251	0	0	0	0	0	400.626	0	0	0	0	0	0	0	0	0	0	0	0
HMF003687	HMF003687A	1363.88	205.667	50.9993	0	357.638	0	0	218.154	0	0	0	0	51.9149	0	0	0	166.582	946.816	0	0	0	0	0	0	0	0	0	0	0	512.649	0	0	0	0	0	0	0	0	0	0	0	0	0	0	0	0	0	0
HMF002007	HMF002007A	1197.47	1542.62	196.958	0	1093.15	0	0	842.503	0	0	0	0	389.391	0	0	0	1341.18	657.298	0	0	0	0	0	0	0	0	0	0	0	1021.29	0	0	0	0	0	573.495	0	0	0	0	0	0	0	0	0	0	0	0
HMF000175	HMF000175A	919.248	910.018	39.0996	0	651.815	0	0	167.252	0	0	0	0	229.708	0	0	0	799.708	0	0	0	0	0	0	0	0	0	0	0	0	497.968	0	0	0	0	0	215.433	0	0	0	0	0	0	0	0	0	0	0	0
HMF000339	HMF000339A	1777.83	648.876	0	0	797.007	0	0	0	0	0	0	0	163.79	0	0	0	106.959	940.084	0	0	0	0	0	0	0	0	0	0	0	421.884	0	0	0	0	0	0	0	0	0	0	0	0	0	0	0	0	0	0
HMF002727	HMF002727A	392.028	0	80.7697	0	982.687	0	0	345.499	0	0	0	0	0	0	0	0	92.4091	736.914	0	0	0	0	0	53.3499	0	0	0	0	0	421.306	0	0	0	0	0	0	0	0	0	0	0	0	0	0	0	0	0	0
HMF001407	HMF001407A	578.083	1299.92	218.502	0	903.455	0	0	934.659	0	0	0	0	328.128	0	0	0	612.144	2380.46	0	0	0	0	0	165.05	0	0	0	0	0	803.505	0	0	0	0	0	844.582	0	0	0	0	0	0	0	0	0	0	0	0
HMF002705	HMF002705A	472.339	362.358	172.741	0	1351.9	0	0	738.913	0	0	0	0	91.4671	0	0	0	1430.18	542.389	0	0	0	0	0	75.9771	0	0	0	0	0	1144.82	0	0	0	0	0	334.74	0	0	0	0	0	0	0	0	0	0	0	0
HMF004173	HMF004173A	1496.3	549.622	78.1632	0	652.178	0	0	334.35	0	0	0	0	138.737	0	0	0	119.587	412.01	0	0	0	0	0	0	0	0	0	0	0	241.679	0	0	0	0	0	0	0	0	0	0	0	0	0	0	0	0	0	0
HMF000068	HMF000068A	3268.79	1229.85	456.989	0	960.577	0	0	1954.81	0	0	0	0	310.44	0	0	0	620.256	1245.44	0	0	0	0	0	0	0	0	0	0	0	331.885	0	0	0	0	0	742.361	0	0	0	0	0	0	0	0	0	0	0	0
HMF002623	HMF002623A	558.683	3130.55	0	0	236.724	0	0	0	0	0	0	0	790.22	0	0	0	0	259.353	0	0	0	0	0	96.5871	0	0	0	0	0	812.539	0	0	0	0	0	218.876	0	0	0	0	0	0	0	0	0	0	0	0
HMF001457	HMF001457A	676.357	2308.75	268.826	0	1151.33	0	0	1149.92	0	0	0	0	582.778	0	0	0	1120.94	2069.09	0	0	0	0	0	96.9829	0	0	0	0	0	1028.04	0	0	0	0	0	900.976	0	0	0	0	0	0	0	0	0	0	0	0
HMF002709	HMF002709A	642.872	300.333	152.862	0	704.012	0	0	653.879	0	0	0	0	75.8105	0	0	0	254.737	854.137	0	0	0	0	0	49.6778	0	0	0	0	0	335.806	0	0	0	0	0	0	0	0	0	0	0	0	0	0	0	0	0	0
HMF001040	HMF001040A	1666.97	2945.07	144.37	0	1077.5	0	0	617.557	0	0	0	0	743.399	0	0	0	1321.98	1282.01	0	0	0	0	0	0	0	0	0	0	0	1127.93	0	0	0	0	0	544.519	0	0	0	0	0	0	0	0	0	0	0	0
HMF002577	HMF002577A	1147.01	351.812	183.827	0	640.344	0	0	786.335	0	0	0	0	88.805	0	0	0	312.233	1096.27	0	0	0	0	0	0	0	0	0	0	0	382.84	0	0	0	0	0	190.917	0	0	0	0	0	0	0	0	0	0	0	0
HMF000132	HMF000132A	2774.92	915.88	57.5666	0	1015.68	0	0	246.246	0	0	0	0	231.188	0	0	0	122.361	834.733	0	0	0	0	0	0	0	0	0	0	0	415.612	0	0	0	0	0	0	0	0	0	0	0	0	0	0	0	0	0	0
HMF001659	HMF001659B	1005.75	5767.41	580.995	0	4366.3	0	0	2485.25	0	0	0	0	1455.82	0	0	0	4423.55	0	0	0	0	0	0	0	0	0	0	0	0	1616.1	0	0	0	0	0	2815.81	0	0	0	0	0	0	0	0	0	0	0	0
HMF002695	HMF002695A	598.806	135.688	124.037	0	1013.88	0	0	530.578	0	0	0	0	34.2505	0	0	0	258.442	1353.98	0	0	0	0	0	71.0991	0	0	0	0	0	276.024	0	0	0	0	0	312.224	0	0	0	0	0	0	0	0	0	0	0	0
HMF000412	HMF000412A	2214.98	1598.75	339.388	0	3577.01	0	0	1451.76	0	0	0	0	403.56	0	0	0	4388.61	0	0	0	0	0	0	0	0	0	0	0	0	787.483	0	0	0	0	0	620.456	0	0	0	0	0	0	0	0	0	0	0	0
HMF002048	HMF002048A	1565.45	740.91	578.797	0	1718.1	0	0	2475.85	0	0	0	0	187.022	0	0	0	0	1861.38	0	0	0	0	0	462.793	0	0	0	0	0	1321.68	0	0	0	0	0	0	0	0	0	0	0	0	0	0	0	0	0	0
HMF002294	HMF002294A	0	383.826	190.495	0	980.657	0	0	814.858	0	0	0	0	96.8861	0	0	0	336.351	1877.42	0	0	0	0	0	140.603	0	0	0	0	0	440.778	0	0	0	0	0	740.786	0	0	0	0	0	0	0	0	0	0	0	0
HMF000638	HMF000638A	378.995	0	120.545	0	503.626	0	0	515.642	0	0	0	0	0	0	0	0	124.506	1864.77	0	0	0	0	0	164.082	0	0	0	0	0	416.743	0	0	0	0	0	292.928	0	0	0	0	0	0	0	0	0	0	0	0
HMF001904	HMF001904A	338.724	2342.21	102.176	0	374.773	0	0	437.068	0	0	0	0	591.224	0	0	0	0	1106.63	0	0	0	0	0	152.913	0	0	0	0	0	705.591	0	0	0	0	0	360.334	0	0	0	0	0	0	0	0	0	0	0	0
HMF000358	HMF000358A	1217.44	1157.75	224.128	0	1569.19	0	0	958.725	0	0	0	0	292.242	0	0	0	1925.23	1310.66	0	0	0	0	0	0	0	0	0	0	0	1195.38	0	0	0	0	0	309.246	0	0	0	0	0	0	0	0	0	0	0	0
HMF002929	HMF002929A	761.801	138.951	50.7446	0	534.478	0	0	217.064	0	0	0	0	35.0743	0	0	0	69.9056	291.38	0	0	0	0	0	57.1144	0	0	0	0	0	236.715	0	0	0	0	0	89.7712	0	0	0	0	0	0	0	0	0	0	0	0
HMF001354	HMF001354A	369.861	356.293	114.438	0	1329.23	0	0	489.518	0	0	0	0	89.936	0	0	0	156.198	432.253	0	0	0	0	0	0	0	0	0	0	0	685.815	0	0	0	0	0	250.567	0	0	0	0	0	0	0	0	0	0	0	0
HMF002685	HMF002685A	438.023	139.817	364.6	0	1278.5	0	0	1559.61	0	0	0	0	35.2927	0	0	0	267.987	836.633	0	0	0	0	0	111.317	0	0	0	0	0	681.48	0	0	0	0	0	337.746	0	0	0	0	0	0	0	0	0	0	0	0
HMF002826	HMF002826A	505.651	0	534.913	0	1765.22	0	0	2288.14	0	0	0	0	0	0	0	0	202.057	0	0	0	0	0	0	97.2991	0	0	0	0	0	1741.8	0	0	0	0	0	0	0	0	0	0	0	0	0	0	0	0	0	0
HMF000721	HMF000721A	0	881.733	279.814	0	4325.24	0	0	1196.93	0	0	0	0	222.569	0	0	0	1855.56	601.209	0	0	0	0	0	400.95	0	0	0	0	0	3502.13	0	0	0	0	0	1581.86	0	0	0	0	0	0	0	0	0	0	0	0
HMF000585	HMF000585A	1876.58	598.544	177.408	0	762.395	0	0	758.876	0	0	0	0	151.085	0	0	0	0	1644.27	0	0	0	0	0	101.635	0	0	0	0	0	606.126	0	0	0	0	0	0	0	0	0	0	0	0	0	0	0	0	0	0
HMF001479	HMF001479A	666.685	419.788	44.8857	0	592.15	0	0	192.002	0	0	0	0	105.964	0	0	0	157.496	415.303	0	0	0	0	0	0	0	0	0	0	0	294.361	0	0	0	0	0	163.423	0	0	0	0	0	0	0	0	0	0	0	0
HMF001621	HMF001621A	2407.52	4448.83	374.092	0	1143.81	0	0	1600.21	0	0	0	0	1122.98	0	0	0	0	1408.85	0	0	0	0	0	205.944	0	0	0	0	0	899.504	0	0	0	0	0	323.04	0	0	0	0	0	0	0	0	0	0	0	0
HMF003710	HMF003710A	595.463	475.449	133.222	0	678.202	0	0	569.867	0	0	0	0	120.014	0	0	0	832.082	1118.51	0	0	0	0	0	0	0	0	0	0	0	651.791	0	0	0	0	0	537.627	0	0	0	0	0	0	0	0	0	0	0	0
HMF001896	HMF001896A	330.199	93.3837	40.883	0	299.64	0	0	174.88	0	0	0	0	23.5721	0	0	0	148.87	721.396	0	0	0	0	0	72.75	0	0	0	0	0	546.466	0	0	0	0	0	184.004	0	0	0	0	0	0	0	0	0	0	0	0
HMF001193	HMF001193A	373.237	540.747	1426.02	0	2351.46	0	0	6099.92	0	0	0	0	136.496	0	0	0	545.037	0	0	0	0	0	0	216.314	0	0	0	0	0	1223.55	0	0	0	0	0	1273.22	0	0	0	0	0	0	0	0	0	0	0	0
HMF001710	HMF001710A	2181.72	715.952	0	0	640.136	0	0	0	0	0	0	0	180.722	0	0	0	90.9523	1059.75	0	0	0	0	0	0	0	0	0	0	0	182.145	0	0	0	0	0	152.54	0	0	0	0	0	0	0	0	0	0	0	0
HMF002947	HMF002947A	866.597	959.848	163.919	0	1034.74	0	0	701.178	0	0	0	0	242.287	0	0	0	1269.52	2169.24	0	0	0	0	0	0	0	0	0	0	0	849.095	0	0	0	0	0	658.574	0	0	0	0	0	0	0	0	0	0	0	0
HMF002275	HMF002275A	287.219	0	66.4847	0	356.774	0	0	284.394	0	0	0	0	0	0	0	0	68.2124	1389.48	0	0	0	0	0	122.885	0	0	0	0	0	180.953	0	0	0	0	0	156.893	0	0	0	0	0	0	0	0	0	0	0	0
HMF003304	HMF003304A	1503.24	986.788	237.489	0	921.959	0	0	1015.88	0	0	0	0	249.087	0	0	0	641.25	1665.66	0	0	0	0	0	0	0	0	0	0	0	455.769	0	0	0	0	0	225.886	0	0	0	0	0	0	0	0	0	0	0	0
HMF001139	HMF001139A	280.189	250.131	138.852	0	1145.55	0	0	593.949	0	0	0	0	63.1386	0	0	0	314.536	634.058	0	0	0	0	0	0	0	0	0	0	0	475.669	0	0	0	0	0	269.161	0	0	0	0	0	0	0	0	0	0	0	0
HMF000963	HMF000963A	394.917	1393.97	615.23	0	2429.05	0	0	2631.7	0	0	0	0	351.869	0	0	0	1185.23	491.018	0	0	0	0	0	155.197	0	0	0	0	0	1172.74	0	0	0	0	0	1493.08	0	0	0	0	0	0	0	0	0	0	0	0
HMF001561	HMF001561A	722.367	0	109.518	0	990.932	0	0	468.474	0	0	0	0	0	0	0	0	189.803	1246.09	0	0	0	0	0	147.006	0	0	0	0	0	622.301	0	0	0	0	0	1036.5	0	0	0	0	0	0	0	0	0	0	0	0
HMF002349	HMF002349A	3921.2	0	0	0	24058.1	0	0	0	0	0	0	0	0	0	0	0	29516.8	0	0	0	0	0	0	0	0	0	0	0	0	2292.83	0	0	0	0	0	0	0	0	0	0	0	0	0	0	0	0	0	0
HMF002398	HMF002398B	421.366	123.509	205.074	0	511.319	0	0	877.22	0	0	0	0	31.1763	0	0	0	162.145	581.576	0	0	0	0	0	154.704	0	0	0	0	0	1023.03	0	0	0	0	0	285.766	0	0	0	0	0	0	0	0	0	0	0	0
HMF001952	HMF001952A	583.017	479.473	322.608	0	1398.52	0	0	1379.98	0	0	0	0	121.03	0	0	0	237.536	0	0	0	0	0	0	143.468	0	0	0	0	0	3187.36	0	0	0	0	0	0	0	0	0	0	0	0	0	0	0	0	0	0
HMF000966	HMF000966A	784.527	466.202	290.272	0	969.868	0	0	1241.66	0	0	0	0	117.679	0	0	0	650.557	1586.61	0	0	0	0	0	179.373	0	0	0	0	0	630.03	0	0	0	0	0	533.218	0	0	0	0	0	0	0	0	0	0	0	0
HMF001659	HMF001659A	1013.62	4982.34	844.826	0	5626.92	0	0	3613.81	0	0	0	0	1257.65	0	0	0	6903.64	0	0	0	0	0	0	0	0	0	0	0	0	2064.81	0	0	0	0	0	3048.38	0	0	0	0	0	0	0	0	0	0	0	0
HMF002684	HMF002684A	622.182	0	121.715	0	360.636	0	0	425.788	0	0	0	0	30.5664	0	0	0	56.1038	0	0	0	0	0	0	0	0	0	0	0	0	297.05	0	0	0	0	0	0	197.866	0	0	0	0	0	0	0	0	0	0	0
HMF002377	HMF002377A	1033.66	1295.74	329.363	0	599.143	0	0	1248.23	0	0	0	0	82.7131	0	0	0	445.583	797.148	0	0	0	0	0	0	0	0	0	0	0	1027.69	0	0	0	0	0	0	1228.73	0	0	0	0	0	0	0	0	0	0	0
HMF000256	HMF000256A	405.205	220.041	692.679	0	234.87	0	0	987.93	0	0	0	0	173.953	0	0	0	112.276	319.787	0	0	0	0	0	0	0	0	0	0	0	582.433	0	0	0	0	0	0	538.826	0	0	0	0	0	0	0	0	0	0	0
HMF000662	HMF000662A	910.614	1655.62	706.346	0	527.821	0	0	2554.33	0	0	0	0	177.385	0	0	0	440.867	539.226	0	0	0	0	0	0	0	0	0	0	0	542.721	0	0	0	0	0	0	2044.07	0	0	0	0	0	0	0	0	0	0	0
HMF001829	HMF001829A	511.056	137.484	107.473	0	296.224	0	0	288.062	0	0	0	0	26.9897	0	0	0	75.0373	342.452	0	0	0	0	0	0	0	0	0	0	0	310.221	0	0	0	0	0	0	0	0	0	0	0	0	0	0	0	0	0	0
HMF002185	HMF002185A	0	0	0	0	0	0	0	0	0	0	0	0	0	0	0	0	0	0	0	0	0	0	0	0	0	0	0	0	0	0	0	0	0	0	0	0	0	0	0	0	0	0	0	0	0	0	0	0
HMF003068	HMF003068A	292.475	936.572	0	0	169.528	0	0	0	0	0	0	0	0	0	0	0	0	470.046	0	0	0	0	0	0	0	0	0	0	0	4273.65	0	0	0	0	0	0	358.441	0	0	0	0	0	0	0	0	0	0	0
HMF002210	HMF002210A	794.934	234.822	555.112	0	460.769	0	0	2398.47	0	0	0	0	139.405	0	0	0	0	519.395	0	0	0	0	0	0	0	0	0	0	0	854.714	0	0	0	0	0	0	1401.47	0	0	0	0	0	0	0	0	0	0	0
HMF000359	HMF000359A	316.349	0	204.683	0	183.366	0	0	450.391	0	0	0	0	51.4022	0	0	0	80.7117	189.324	0	0	0	0	0	0	0	0	0	0	0	253.096	0	0	0	0	0	0	170.391	0	0	0	0	0	0	0	0	0	0	0
HMF002742	HMF002742A	534.189	345.337	917.266	0	309.633	0	0	3193.61	0	0	0	0	230.353	0	0	0	234.729	663.647	0	0	0	0	0	0	0	0	0	0	0	751.232	0	0	0	0	0	0	0	0	0	0	0	0	0	0	0	0	0	0
HMF000012	HMF000012A	480.23	285.409	0	0	278.357	0	0	124.178	0	0	0	0	0	0	0	0	194.278	187.769	0	0	0	0	0	0	0	0	0	0	0	432.62	0	0	0	0	0	0	372.534	0	0	0	0	0	0	0	0	0	0	0
HMF003702	HMF003702A	202.366	78.5314	0	0	117.298	0	0	96.654	0	0	0	0	0	0	0	0	0	0	0	0	0	0	0	0	0	0	0	0	0	55.3747	0	0	0	0	0	0	41.7827	0	0	0	0	0	0	0	0	0	0	0
HMF000647	HMF000647A	627.38	199.503	0	0	363.649	0	0	467.335	0	0	0	0	0	0	0	0	0	296.76	0	0	0	0	0	0	0	0	0	0	0	374.067	0	0	0	0	0	0	322.197	0	0	0	0	0	0	0	0	0	0	0
HMF000405	HMF000405A	347.688	0	485.524	0	201.531	0	0	2011.63	0	0	0	0	121.93	0	0	0	128.017	212.86	0	0	0	0	0	0	0	0	0	0	0	231.937	0	0	0	0	0	0	219.888	0	0	0	0	0	0	0	0	0	0	0
HMF003017	HMF003017A	446.207	348.903	509.922	0	258.636	0	0	1290.03	0	0	0	0	128.057	0	0	0	213.162	324.268	0	0	0	0	0	0	0	0	0	0	0	380.575	0	0	0	0	0	0	593.235	0	0	0	0	0	0	0	0	0	0	0
HMF002453	HMF002453A	103.588	3673.45	537.146	0	60.0431	0	0	0	0	0	0	0	134.894	0	0	0	0	359.789	0	0	0	0	0	0	0	0	0	0	0	0	0	0	0	0	0	0	0	0	0	0	0	0	0	0	0	0	0	0
HMF000795	HMF000795A	869.803	0	0	0	504.165	0	0	496.141	0	0	0	0	0	0	0	0	209.247	1466.24	0	0	0	0	0	0	0	0	0	0	0	113.951	0	0	0	0	0	0	0	0	0	0	0	0	0	0	0	0	0	0
HMF000831	HMF000831A	564.968	654.022	0	0	327.474	0	0	660.046	0	0	0	0	0	0	0	0	91.8543	168.149	0	0	0	0	0	0	0	0	0	0	0	527.033	0	0	0	0	0	0	227.879	0	0	0	0	0	0	0	0	0	0	0
HMF002570	HMF002570A	910.815	0	184.17	0	527.937	0	0	393.071	0	0	0	0	46.2508	0	0	0	0	0	0	0	0	0	0	0	0	0	0	0	0	432.73	0	0	0	0	0	0	914.155	0	0	0	0	0	0	0	0	0	0	0
HMF002289	HMF002289A	1480.59	1869.72	1348.56	0	858.197	0	0	0	0	0	0	0	338.665	0	0	0	212.16	241.822	0	0	0	0	0	0	0	0	0	0	0	1053.26	0	0	0	0	0	0	1450.43	0	0	0	0	0	0	0	0	0	0	0
HMF001749	HMF001749A	979.896	142.177	0	0	567.979	0	0	163.278	0	0	0	0	0	0	0	0	572.226	0	0	0	0	0	0	0	0	0	0	0	0	456.676	0	0	0	0	0	0	931.94	0	0	0	0	0	0	0	0	0	0	0
HMF001122	HMF001122A	594.292	0	136.825	0	344.471	0	0	456.831	0	0	0	0	34.361	0	0	0	95.3823	208.837	0	0	0	0	0	0	0	0	0	0	0	148.094	0	0	0	0	0	0	296.689	0	0	0	0	0	0	0	0	0	0	0
HMF003485	HMF003485A	411.112	131.879	298.257	0	238.294	0	0	618.934	0	0	0	0	74.9015	0	0	0	138.374	353.177	0	0	0	0	0	0	0	0	0	0	0	268.255	0	0	0	0	0	0	201.816	0	0	0	0	0	0	0	0	0	0	0
HMF001999	HMF001999B	0	16163.8	880.254	0	0	0	0	0	0	0	0	0	221.059	0	0	0	395.933	0	0	0	0	0	0	0	0	0	0	0	0	0	0	0	0	0	0	0	0	0	0	0	0	0	0	0	0	0	0	0
HMF000576	HMF000576A	341.208	123.652	455.505	0	197.775	0	0	0	0	0	0	0	114.391	0	0	0	168.526	230.85	0	0	0	0	0	0	0	0	0	0	0	227.859	0	0	0	0	0	0	627.235	0	0	0	0	0	0	0	0	0	0	0
HMF001923	HMF001923A	426.389	0	885.135	0	247.149	0	0	1627.18	0	0	0	0	222.284	0	0	0	1585.24	873.253	0	0	0	0	0	0	0	0	0	0	0	255.635	0	0	0	0	0	0	1752	0	0	0	0	0	0	0	0	0	0	0
HMF004365	HMF004365A	281.672	224.233	329.047	0	163.266	0	0	384.471	0	0	0	0	82.6338	0	0	0	0	263.536	0	0	0	0	0	0	0	0	0	0	0	231.791	0	0	0	0	0	0	0	0	0	0	0	0	0	0	0	0	0	0
HMF004079	HMF004079A	399.632	92.1127	262.484	0	231.64	0	0	343.42	0	0	0	0	65.9177	0	0	0	112.638	0	0	0	0	0	0	0	0	0	0	0	0	285.85	0	0	0	0	0	0	170.709	0	0	0	0	0	0	0	0	0	0	0
HMF001702	HMF001702A	587.462	0	279.844	0	340.512	0	0	1245.99	0	0	0	0	70.2775	0	0	0	172.553	638.045	0	0	0	0	0	0	0	0	0	0	0	327.048	0	0	0	0	0	0	456.964	0	0	0	0	0	0	0	0	0	0	0
HMF001639	HMF001639A	671.183	386.084	170.768	0	389.039	0	0	654.03	0	0	0	0	42.885	0	0	0	76.4124	125.678	0	0	0	0	0	0	0	0	0	0	0	351.396	0	0	0	0	0	0	282.525	0	0	0	0	0	0	0	0	0	0	0
HMF001882	HMF001882A	538.933	266.13	511.625	0	312.383	0	0	0	0	0	0	0	128.485	0	0	0	241.664	307.572	0	0	0	0	0	0	0	0	0	0	0	332.038	0	0	0	0	0	0	814.367	0	0	0	0	0	0	0	0	0	0	0
HMF000712	HMF000712A	322.393	0	0	0	186.87	0	0	118.878	0	0	0	0	0	0	0	0	92.6849	100.744	0	0	0	0	0	0	0	0	0	0	0	165.221	0	0	0	0	0	0	213.074	0	0	0	0	0	0	0	0	0	0	0
HMF002172	HMF002172A	613.996	313.992	0	0	355.892	0	0	454.541	0	0	0	0	0	0	0	0	93.2009	134.07	0	0	0	0	0	0	0	0	0	0	0	352.868	0	0	0	0	0	0	0	0	0	0	0	0	0	0	0	0	0	0
HMF000706	HMF000706A	341.801	0	454.11	0	198.119	0	0	1000.19	0	0	0	0	114.041	0	0	0	0	194.089	0	0	0	0	0	0	0	0	0	0	0	288.36	0	0	0	0	0	0	267.691	0	0	0	0	0	0	0	0	0	0	0
HMF001715	HMF001715A	688.789	0	198.304	0	399.244	0	0	456.954	0	0	0	0	49.8001	0	0	0	135.878	225.457	0	0	0	0	0	0	0	0	0	0	0	295.409	0	0	0	0	0	0	180.165	0	0	0	0	0	0	0	0	0	0	0
HMF001675	HMF001675A	1066.14	685.544	231.006	0	617.969	0	0	1600.6	0	0	0	0	58.0126	0	0	0	358.523	2038.63	0	0	0	0	0	0	0	0	0	0	0	556.536	0	0	0	0	0	0	549.035	0	0	0	0	0	0	0	0	0	0	0
HMF000827	HMF000827A	1217.38	824.431	726.246	0	705.63	0	0	1675.93	0	0	0	0	182.382	0	0	0	1144.18	321.253	0	0	0	0	0	0	0	0	0	0	0	529.24	0	0	0	0	0	0	2491.34	0	0	0	0	0	0	0	0	0	0	0
HMF003469	HMF003469A	381.397	87.5766	78.446	0	221.07	0	0	0	0	0	0	0	19.7002	0	0	0	36.2386	0	0	0	0	0	0	0	0	0	0	0	0	221.458	0	0	0	0	0	0	200.822	0	0	0	0	0	0	0	0	0	0	0
HMF000252	HMF000252A	234.935	137.171	112.03	0	136.176	0	0	535.716	0	0	0	0	28.1341	0	0	0	0	267.359	0	0	0	0	0	0	0	0	0	0	0	294.295	0	0	0	0	0	0	103.253	0	0	0	0	0	0	0	0	0	0	0
HMF003163	HMF003163A	571.631	146.983	182.435	0	331.336	0	0	837.752	0	0	0	0	45.815	0	0	0	212.197	224.738	0	0	0	0	0	0	0	0	0	0	0	295.471	0	0	0	0	0	0	347.642	0	0	0	0	0	0	0	0	0	0	0
HMF002162	HMF002162A	795.23	0	409.286	0	460.941	0	0	601.582	0	0	0	0	102.784	0	0	0	110.015	377.551	0	0	0	0	0	0	0	0	0	0	0	334.046	0	0	0	0	0	0	475.565	0	0	0	0	0	0	0	0	0	0	0
HMF003679	HMF003679A	522.774	0	1387.15	0	303.016	0	0	4375.24	0	0	0	0	348.356	0	0	0	365.186	782.827	0	0	0	0	0	0	0	0	0	0	0	618.469	0	0	0	0	0	0	1631.1	0	0	0	0	0	0	0	0	0	0	0
HMF002303	HMF002303A	570.551	192.376	0	0	330.709	0	0	382.247	0	0	0	0	0	0	0	0	342.669	163.319	0	0	0	0	0	0	0	0	0	0	0	104.204	0	0	0	0	0	0	217.926	0	0	0	0	0	0	0	0	0	0	0
HMF001524	HMF001524A	429.027	0	637.17	0	248.678	0	0	2283.62	0	0	0	0	160.013	0	0	0	258.03	374.997	0	0	0	0	0	0	0	0	0	0	0	459.836	0	0	0	0	0	0	0	0	0	0	0	0	0	0	0	0	0	0
HMF002278	HMF002278A	458.778	0	38.6964	0	265.923	0	0	267.287	0	0	0	0	9.71785	0	0	0	34.2934	96.8285	0	0	0	0	0	0	0	0	0	0	0	172.476	0	0	0	0	0	0	0	0	0	0	0	0	0	0	0	0	0	0
HMF004014	HMF004014A	637.084	0	243.262	0	369.274	0	0	252.463	0	0	0	0	61.0904	0	0	0	74.3418	302.855	0	0	0	0	0	0	0	0	0	0	0	261.444	0	0	0	0	0	0	326.305	0	0	0	0	0	0	0	0	0	0	0
HMF000714	HMF000714B	674.872	338.81	369.751	0	391.177	0	0	880.105	0	0	0	0	92.8557	0	0	0	85.2038	564.851	0	0	0	0	0	0	0	0	0	0	0	408.978	0	0	0	0	0	0	374.395	0	0	0	0	0	0	0	0	0	0	0
HMF002131	HMF002131A	824.334	490.735	380.674	0	477.81	0	0	910.653	0	0	0	0	95.5988	0	0	0	0	579.507	0	0	0	0	0	0	0	0	0	0	0	441.363	0	0	0	0	0	0	784.479	0	0	0	0	0	0	0	0	0	0	0
HMF002993	HMF002993A	3253.88	39800.1	0	0	1886.05	0	0	11771.7	0	0	0	0	0	0	0	0	0	0	0	0	0	0	0	0	0	0	0	0	0	234975	0	0	0	0	0	0	0	0	0	0	0	0	0	0	0	0	0	0
HMF002633	HMF002633A	340.407	0	219.075	0	197.311	0	0	892.043	0	0	0	0	55.0164	0	0	0	110.135	204.821	0	0	0	0	0	0	0	0	0	0	0	223.26	0	0	0	0	0	0	170.933	0	0	0	0	0	0	0	0	0	0	0
HMF002945	HMF002945A	323.47	0	398.392	0	187.494	0	0	902.703	0	0	0	0	100.048	0	0	0	196.871	190.86	0	0	0	0	0	0	0	0	0	0	0	416.285	0	0	0	0	0	0	118.724	0	0	0	0	0	0	0	0	0	0	0
HMF001810	HMF001810A	777.122	215.896	1339.84	0	450.445	0	0	1898.69	0	0	0	0	336.474	0	0	0	291.186	491.127	0	0	0	0	0	0	0	0	0	0	0	550.461	0	0	0	0	0	0	1336.76	0	0	0	0	0	0	0	0	0	0	0
HMF003723	HMF003723A	1063.07	244.311	883.906	0	616.192	0	0	715.483	0	0	0	0	221.976	0	0	0	226.86	0	0	0	0	0	0	0	0	0	0	0	0	654.156	0	0	0	0	0	0	1936.04	0	0	0	0	0	0	0	0	0	0	0
HMF000139	HMF000139A	561.64	297.06	156.826	0	325.545	0	0	1131.32	0	0	0	0	39.3837	0	0	0	101.35	323.021	0	0	0	0	0	0	0	0	0	0	0	708.949	0	0	0	0	0	0	402.903	0	0	0	0	0	0	0	0	0	0	0
HMF000932	HMF000932A	544.042	0	680.086	0	315.344	0	0	342.353	0	0	0	0	170.79	0	0	0	2139.2	0	0	0	0	0	0	0	0	0	0	0	0	587.105	0	0	0	0	0	0	839.365	0	0	0	0	0	0	0	0	0	0	0
HMF002023	HMF002023B	717.597	125.447	263.501	0	415.942	0	0	915.261	0	0	0	0	66.1732	0	0	0	117.418	580.067	0	0	0	0	0	0	0	0	0	0	0	282.005	0	0	0	0	0	0	305.589	0	0	0	0	0	0	0	0	0	0	0
HMF002415	HMF002415A	1157.44	0	279.95	0	670.888	0	0	318.231	0	0	0	0	70.304	0	0	0	0	560.407	0	0	0	0	0	0	0	0	0	0	0	888.645	0	0	0	0	0	0	837.107	0	0	0	0	0	0	0	0	0	0	0
HMF000330	HMF000330A	277.813	0	484.052	0	161.029	0	0	1629.41	0	0	0	0	121.56	0	0	0	403.07	661.035	0	0	0	0	0	0	0	0	0	0	0	482.172	0	0	0	0	0	0	440.858	0	0	0	0	0	0	0	0	0	0	0
HMF001976	HMF001976A	472.439	0	114.846	0	273.841	0	0	300.799	0	0	0	0	28.8414	0	0	0	140.704	375.377	0	0	0	0	0	0	0	0	0	0	0	331.128	0	0	0	0	0	0	226.718	0	0	0	0	0	0	0	0	0	0	0
HMF003211	HMF003211A	1172.93	1726.1	2759.67	0	679.865	0	0	964.954	0	0	0	0	693.036	0	0	0	1095.15	1797.71	0	0	0	0	0	0	0	0	0	0	0	442.667	0	0	0	0	0	0	3271.93	0	0	0	0	0	0	0	0	0	0	0
HMF002112	HMF002112A	598.011	104.07	99.5772	0	346.626	0	0	309.209	0	0	0	0	25.0069	0	0	0	81.0547	172.617	0	0	0	0	0	0	0	0	0	0	0	321.217	0	0	0	0	0	0	164.611	0	0	0	0	0	0	0	0	0	0	0
HMF000276	HMF000276A	779.018	1304.16	1260.06	0	451.544	0	0	0	0	0	0	0	316.44	0	0	0	435.553	966.226	0	0	0	0	0	0	0	0	0	0	0	351.947	0	0	0	0	0	0	692.379	0	0	0	0	0	0	0	0	0	0	0
HMF000571	HMF000571B	412.688	286.894	142.867	0	239.207	0	0	303.417	0	0	0	0	35.8783	0	0	0	50.0687	88.121	0	0	0	0	0	0	0	0	0	0	0	228.313	0	0	0	0	0	0	0	0	0	0	0	0	0	0	0	0	0	0
HMF000310	HMF000310A	762.485	0	303.142	0	441.961	0	0	1788.63	0	0	0	0	76.1282	0	0	0	0	731.986	0	0	0	0	0	0	0	0	0	0	0	444.903	0	0	0	0	0	0	304.619	0	0	0	0	0	0	0	0	0	0	0
HMF002669	HMF002669A	1357.05	0	891.046	0	786.591	0	0	726.379	0	0	0	0	223.769	0	0	0	351.442	867.856	0	0	0	0	0	0	0	0	0	0	0	413.431	0	0	0	0	0	0	297.45	0	0	0	0	0	0	0	0	0	0	0
HMF003122	HMF003122A	933.736	416.63	287.829	0	541.223	0	0	723.725	0	0	0	0	72.2827	0	0	0	118.037	544.17	0	0	0	0	0	0	0	0	0	0	0	450.14	0	0	0	0	0	0	727.227	0	0	0	0	0	0	0	0	0	0	0
HMF000517	HMF000517A	1633.41	577.096	412.138	0	946.778	0	0	1701.31	0	0	0	0	103.5	0	0	0	532.127	2474.77	0	0	0	0	0	0	0	0	0	0	0	0	0	0	0	0	0	0	1413.51	0	0	0	0	0	0	0	0	0	0	0
HMF001332	HMF001332A	626.679	151.224	359.827	0	363.243	0	0	671.058	0	0	0	0	90.3635	0	0	0	142.768	311.403	0	0	0	0	0	0	0	0	0	0	0	325.331	0	0	0	0	0	0	0	0	0	0	0	0	0	0	0	0	0	0
HMF001032	HMF001032A	747.006	677.646	1073.65	0	432.989	0	0	1920.75	0	0	0	0	269.625	0	0	0	306.017	917.051	0	0	0	0	0	0	0	0	0	0	0	444.251	0	0	0	0	0	0	2082.02	0	0	0	0	0	0	0	0	0	0	0
HMF002102	HMF002102A	1008.41	0	0	0	584.505	0	0	810.482	0	0	0	0	0	0	0	0	101.185	0	0	0	0	0	0	0	0	0	0	0	0	440.806	0	0	0	0	0	0	702.284	0	0	0	0	0	0	0	0	0	0	0
HMF000532	HMF000532A	463.531	240.24	372.46	0	268.677	0	0	1115.29	0	0	0	0	93.536	0	0	0	244.236	109.881	0	0	0	0	0	0	0	0	0	0	0	242.737	0	0	0	0	0	0	0	0	0	0	0	0	0	0	0	0	0	0
HMF001262	HMF001262A	456.609	0	0	0	264.665	0	0	380.124	0	0	0	0	0	0	0	0	127.552	1047.75	0	0	0	0	0	0	0	0	0	0	0	0	0	0	0	0	0	0	0	0	0	0	0	0	0	0	0	0	0	0
HMF001988	HMF001988A	625.694	0	399.177	0	362.672	0	0	1616.01	0	0	0	0	100.245	0	0	0	205.556	460.007	0	0	0	0	0	0	0	0	0	0	0	397.143	0	0	0	0	0	0	234.494	0	0	0	0	0	0	0	0	0	0	0
HMF000124	HMF000124A	587.281	0	0	0	340.407	0	0	136.028	0	0	0	0	0	0	0	0	68.0138	781.659	0	0	0	0	0	0	0	0	0	0	0	169.034	0	0	0	0	0	0	380.577	0	0	0	0	0	0	0	0	0	0	0
HMF001568	HMF001568A	727.245	346.933	777.148	0	421.534	0	0	922.823	0	0	0	0	195.165	0	0	0	315.939	777.351	0	0	0	0	0	0	0	0	0	0	0	230.956	0	0	0	0	0	0	495.905	0	0	0	0	0	0	0	0	0	0	0
HMF001192	HMF001192A	450.171	113.415	279.572	0	260.934	0	0	750.75	0	0	0	0	70.2091	0	0	0	151.555	278.018	0	0	0	0	0	0	0	0	0	0	0	337.235	0	0	0	0	0	0	311.14	0	0	0	0	0	0	0	0	0	0	0
HMF001854	HMF001854A	741.056	270.791	201.262	0	429.54	0	0	1516.83	0	0	0	0	50.5431	0	0	0	542.581	826.362	0	0	0	0	0	0	0	0	0	0	0	784.394	0	0	0	0	0	0	1760.64	0	0	0	0	0	0	0	0	0	0	0
HMF001818	HMF001818A	561.997	173.474	0	0	325.751	0	0	212.244	0	0	0	0	0	0	0	0	0	0	0	0	0	0	0	0	0	0	0	0	0	194.35	0	0	0	0	0	0	237.097	0	0	0	0	0	0	0	0	0	0	0
HMF004339	HMF004339A	0	0	382.03	0	0	0	0	3457.28	0	0	0	0	95.9394	0	0	0	323.979	1282.42	0	0	0	0	0	0	0	0	0	0	0	1971.38	0	0	0	0	0	0	281.482	0	0	0	0	0	0	0	0	0	0	0
HMF004111	HMF004111A	323.583	0	76.4504	0	187.559	0	0	0	0	0	0	0	19.199	0	0	0	50.1021	304.661	0	0	0	0	0	0	0	0	0	0	0	125.002	0	0	0	0	0	0	229.255	0	0	0	0	0	0	0	0	0	0	0
HMF001044	HMF001044B	191.675	1084.28	822.966	0	111.101	0	0	2464.81	0	0	0	0	206.672	0	0	0	941.411	755.936	0	0	0	0	0	0	0	0	0	0	0	690.268	0	0	0	0	0	0	733.88	0	0	0	0	0	0	0	0	0	0	0
HMF001009	HMF001009A	560.564	369.371	324.15	0	324.921	0	0	1368.93	0	0	0	0	81.4039	0	0	0	383.945	1581.01	0	0	0	0	0	0	0	0	0	0	0	363.34	0	0	0	0	0	0	664.365	0	0	0	0	0	0	0	0	0	0	0
HMF001553	HMF001553A	645.265	0	141.352	0	374.016	0	0	454.469	0	0	0	0	35.4978	0	0	0	73.0577	361.258	0	0	0	0	0	0	0	0	0	0	0	182.896	0	0	0	0	0	0	221.188	0	0	0	0	0	0	0	0	0	0	0
HMF002018	HMF002018A	964.159	1189.06	0	0	558.858	0	0	1724.19	0	0	0	0	0	0	0	0	236.614	1660.79	0	0	0	0	0	0	0	0	0	0	0	468.237	0	0	0	0	0	0	558.09	0	0	0	0	0	0	0	0	0	0	0
HMF000416	HMF000416A	869.49	0	204.462	0	503.984	0	0	693.982	0	0	0	0	51.3467	0	0	0	135.898	852.863	0	0	0	0	0	0	0	0	0	0	0	412.192	0	0	0	0	0	0	291.782	0	0	0	0	0	0	0	0	0	0	0
HMF003480	HMF003480A	506.342	175.121	0	0	293.492	0	0	218.775	0	0	0	0	0	0	0	0	0	189.672	0	0	0	0	0	0	0	0	0	0	0	274.975	0	0	0	0	0	0	0	0	0	0	0	0	0	0	0	0	0	0
HMF000894	HMF000894A	225.87	0	93.8552	0	130.922	0	0	350.268	0	0	0	0	23.5699	0	0	0	38.6399	107.891	0	0	0	0	0	0	0	0	0	0	0	79.7889	0	0	0	0	0	0	172.625	0	0	0	0	0	0	0	0	0	0	0
HMF002083	HMF002083A	774.109	0	142.498	0	448.698	0	0	357.072	0	0	0	0	35.7857	0	0	0	175.262	660.759	0	0	0	0	0	0	0	0	0	0	0	122.381	0	0	0	0	0	0	596.295	0	0	0	0	0	0	0	0	0	0	0
HMF003120	HMF003120A	1451.86	236.696	0	0	841.543	0	0	390.323	0	0	0	0	0	0	0	0	168.64	1357.12	0	0	0	0	0	0	0	0	0	0	0	480.398	0	0	0	0	0	0	342.284	0	0	0	0	0	0	0	0	0	0	0
HMF002230	HMF002230A	530.326	0	0	0	307.394	0	0	302.887	0	0	0	0	0	0	0	0	0	157.984	0	0	0	0	0	0	0	0	0	0	0	102.136	0	0	0	0	0	0	248.549	0	0	0	0	0	0	0	0	0	0	0
HMF003179	HMF003179A	744.491	316.448	948.385	0	431.531	0	0	1007.02	0	0	0	0	238.168	0	0	0	149.949	752.755	0	0	0	0	0	0	0	0	0	0	0	520.058	0	0	0	0	0	0	567.199	0	0	0	0	0	0	0	0	0	0	0
HMF001402	HMF001402A	619.239	0	0	0	358.931	0	0	291.886	0	0	0	0	0	0	0	0	143.923	1372.06	0	0	0	0	0	0	0	0	0	0	0	380.259	0	0	0	0	0	0	392.379	0	0	0	0	0	0	0	0	0	0	0
HMF002176	HMF002176A	1026.35	341.186	270.7	0	594.907	0	0	869.749	0	0	0	0	67.981	0	0	0	0	397.8	0	0	0	0	0	0	0	0	0	0	0	170.343	0	0	0	0	0	0	654.316	0	0	0	0	0	0	0	0	0	0	0
HMF001929	HMF001929A	924.995	191.496	608.247	0	536.157	0	0	1447.19	0	0	0	0	152.749	0	0	0	257.821	639.815	0	0	0	0	0	0	0	0	0	0	0	822.833	0	0	0	0	0	0	873.699	0	0	0	0	0	0	0	0	0	0	0
HMF000661	HMF000661A	462.692	178.19	133.975	0	268.191	0	0	821.488	0	0	0	0	33.6451	0	0	0	144.465	628.197	0	0	0	0	0	0	0	0	0	0	0	473.664	0	0	0	0	0	0	148.492	0	0	0	0	0	0	0	0	0	0	0
HMF001291	HMF001291A	523.742	0	2194.21	0	303.578	0	0	15780.5	0	0	0	0	551.033	0	0	0	3091.46	9001.6	0	0	0	0	0	0	0	0	0	0	0	1387.86	0	0	0	0	0	0	0	0	0	0	0	0	0	0	0	0	0	0
HMF000099	HMF000099A	627.976	0	204.531	0	363.995	0	0	378.324	0	0	0	0	51.364	0	0	0	113.899	133.969	0	0	0	0	0	0	0	0	0	0	0	357.25	0	0	0	0	0	0	483.692	0	0	0	0	0	0	0	0	0	0	0
HMF001712	HMF001712A	416.137	161.961	163.413	0	241.206	0	0	530.373	0	0	0	0	41.038	0	0	0	48.4884	270.435	0	0	0	0	0	0	0	0	0	0	0	109.974	0	0	0	0	0	0	104.975	0	0	0	0	0	0	0	0	0	0	0
HMF002452	HMF002452A	774.559	528.235	136.325	0	448.959	0	0	389.78	0	0	0	0	34.2353	0	0	0	166.045	390.282	0	0	0	0	0	0	0	0	0	0	0	383.259	0	0	0	0	0	0	250.322	0	0	0	0	0	0	0	0	0	0	0
HMF004176	HMF004176A	851.856	0	4539.18	0	493.763	0	0	8574.44	0	0	0	0	1139.93	0	0	0	1492.19	2862.82	0	0	0	0	0	0	0	0	0	0	0	5857.19	0	0	0	0	0	0	6804.63	0	0	0	0	0	0	0	0	0	0	0
HMF004237	HMF004237A	754.68	0	219.143	0	437.437	0	0	450.433	0	0	0	0	55.0335	0	0	0	157.677	122.526	0	0	0	0	0	0	0	0	0	0	0	457.966	0	0	0	0	0	0	579.989	0	0	0	0	0	0	0	0	0	0	0
HMF001343	HMF001343B	638.888	528.226	524.233	0	370.32	0	0	1927.95	0	0	0	0	131.651	0	0	0	4684.17	0	0	0	0	0	0	0	0	0	0	0	0	460.878	0	0	0	0	0	0	1633.93	0	0	0	0	0	0	0	0	0	0	0
HMF001362	HMF001362B	661.494	668.086	1513.16	0	383.423	0	0	2117.86	0	0	0	0	380.001	0	0	0	350.307	1395.22	0	0	0	0	0	0	0	0	0	0	0	2790.45	0	0	0	0	0	0	0	0	0	0	0	0	0	0	0	0	0	0
HMF002827	HMF002827A	249.555	79.6475	94.6849	0	144.65	0	0	213.738	0	0	0	0	23.7782	0	0	0	51.418	441.086	0	0	0	0	0	0	0	0	0	0	0	148.709	0	0	0	0	0	0	151.734	0	0	0	0	0	0	0	0	0	0	0
HMF000534	HMF000534A	223.622	0	62.5175	0	129.619	0	0	150.38	0	0	0	0	15.7001	0	0	0	0	0	0	0	0	0	0	0	0	0	0	0	0	172.583	0	0	0	0	0	0	87.3009	0	0	0	0	0	0	0	0	0	0	0
HMF002522	HMF002522A	995.21	517.692	1001.7	0	576.855	0	0	811.518	0	0	0	0	251.557	0	0	0	180.892	566.663	0	0	0	0	0	0	0	0	0	0	0	736.562	0	0	0	0	0	0	1090.35	0	0	0	0	0	0	0	0	0	0	0
HMF003295	HMF003295A	1046.05	0	446.508	0	606.323	0	0	1455.47	0	0	0	0	112.132	0	0	0	260.531	700.429	0	0	0	0	0	0	0	0	0	0	0	284.079	0	0	0	0	0	0	971.482	0	0	0	0	0	0	0	0	0	0	0
HMF001878	HMF001878A	455.936	0	0	0	264.275	0	0	301.297	0	0	0	0	0	0	0	0	58.5577	133.131	0	0	0	0	0	0	0	0	0	0	0	106.605	0	0	0	0	0	0	86.5854	0	0	0	0	0	0	0	0	0	0	0
HMF002304	HMF002304A	593.543	203.8	502.253	0	344.037	0	0	1658.87	0	0	0	0	126.131	0	0	0	0	802.712	0	0	0	0	0	0	0	0	0	0	0	472.536	0	0	0	0	0	0	320.186	0	0	0	0	0	0	0	0	0	0	0
HMF003466	HMF003466A	541.466	627.567	3268.22	0	313.851	0	0	2829.82	0	0	0	0	820.749	0	0	0	1220.52	1313.33	0	0	0	0	0	0	0	0	0	0	0	0	0	0	0	0	0	0	2118.48	0	0	0	0	0	0	0	0	0	0	0
HMF000928	HMF000928A	908.441	0	363.545	0	526.561	0	0	842.708	0	0	0	0	91.2972	0	0	0	206.928	466.338	0	0	0	0	0	0	0	0	0	0	0	311.892	0	0	0	0	0	0	609.289	0	0	0	0	0	0	0	0	0	0	0
HMF002979	HMF002979A	419.814	0	480.513	0	243.338	0	0	1948.48	0	0	0	0	120.671	0	0	0	110.942	303.84	0	0	0	0	0	0	0	0	0	0	0	434.772	0	0	0	0	0	0	666.65	0	0	0	0	0	0	0	0	0	0	0
HMF001377	HMF001377A	427.15	239.552	728.778	0	247.59	0	0	3074.75	0	0	0	0	183.018	0	0	0	1492.71	1180.79	0	0	0	0	0	0	0	0	0	0	0	801.003	0	0	0	0	0	0	1257.65	0	0	0	0	0	0	0	0	0	0	0
HMF002872	HMF002872A	719.657	0	761.508	0	417.136	0	0	2934.76	0	0	0	0	191.238	0	0	0	633.164	213.555	0	0	0	0	0	0	0	0	0	0	0	414.107	0	0	0	0	0	0	1458.88	0	0	0	0	0	0	0	0	0	0	0
HMF002726	HMF002726A	1018.34	861.501	292.355	0	590.262	0	0	1365.76	0	0	0	0	73.4192	0	0	0	406.416	813.333	0	0	0	0	0	0	0	0	0	0	0	605.108	0	0	0	0	0	0	0	0	0	0	0	0	0	0	0	0	0	0
HMF001826	HMF001826A	730.627	312.074	0	0	423.495	0	0	639.175	0	0	0	0	0	0	0	0	187.345	2873.28	0	0	0	0	0	0	0	0	0	0	0	0	0	0	0	0	0	0	0	0	0	0	0	0	0	0	0	0	0	0
HMF002417	HMF002417A	365.906	417.137	260.737	0	212.091	0	0	1394.79	0	0	0	0	65.479	0	0	0	173.849	337.706	0	0	0	0	0	0	0	0	0	0	0	650.434	0	0	0	0	0	0	0	0	0	0	0	0	0	0	0	0	0	0
HMF001915	HMF001915A	0	54875.5	0	0	0	0	0	0	0	0	0	0	0	0	0	0	0	0	0	0	0	0	0	0	0	0	0	0	0	153808	0	0	0	0	0	0	0	0	0	0	0	0	0	0	0	0	0	0
HMF000951	HMF000951A	1381.91	0	0	0	800.998	0	0	2653.21	0	0	0	0	0	0	0	0	263.67	0	0	0	0	0	0	0	0	0	0	0	0	0	0	0	0	0	0	0	3359.66	0	0	0	0	0	0	0	0	0	0	0
HMF000345	HMF000345A	566.61	0	138.794	0	328.425	0	0	654.904	0	0	0	0	34.8553	0	0	0	159.757	674.75	0	0	0	0	0	0	0	0	0	0	0	180.595	0	0	0	0	0	0	988.31	0	0	0	0	0	0	0	0	0	0	0
HMF002571	HMF002571A	479.235	353.773	226.45	0	277.78	0	0	376.759	0	0	0	0	56.8685	0	0	0	0	193.876	0	0	0	0	0	0	0	0	0	0	0	290.314	0	0	0	0	0	0	0	0	0	0	0	0	0	0	0	0	0	0
HMF000013	HMF000013A	490.368	368.311	0	0	284.233	0	0	199.897	0	0	0	0	0	0	0	0	70.4638	191.901	0	0	0	0	0	0	0	0	0	0	0	132.432	0	0	0	0	0	0	206.394	0	0	0	0	0	0	0	0	0	0	0
HMF003896	HMF003896A	438.383	157.11	395.919	0	254.101	0	0	0	0	0	0	0	99.4272	0	0	0	76.5534	494.345	0	0	0	0	0	0	0	0	0	0	0	81.0566	0	0	0	0	0	0	152.106	0	0	0	0	0	0	0	0	0	0	0
HMF004056	HMF004056A	694.685	0	0	0	402.662	0	0	1321.62	0	0	0	0	0	0	0	0	10996.5	0	0	0	0	0	0	0	0	0	0	0	0	0	0	0	0	0	0	0	0	0	0	0	0	0	0	0	0	0	0	0
HMF000977	HMF000977B	3572.8	0	11990.8	0	2070.91	0	0	8103.84	0	0	0	0	3011.26	0	0	0	6000.44	1624.76	0	0	0	0	0	0	0	0	0	0	0	0	0	0	0	0	0	0	9003.16	0	0	0	0	0	0	0	0	0	0	0
HMF000373	HMF000373A	2819.34	0	0	0	1634.18	0	0	3316.4	0	0	0	0	0	0	0	0	631.789	3206.43	0	0	0	0	0	0	0	0	0	0	0	907.698	0	0	0	0	0	0	707.264	0	0	0	0	0	0	0	0	0	0	0
HMF000368	HMF000368B	673.289	0	305.45	0	390.26	0	0	619.446	0	0	0	0	76.7078	0	0	0	54.9508	112.399	0	0	0	0	0	0	0	0	0	0	0	212.81	0	0	0	0	0	0	288.242	0	0	0	0	0	0	0	0	0	0	0
HMF001732	HMF001732A	1669.43	0	1013.02	0	967.654	0	0	4194.68	0	0	0	0	254.401	0	0	0	578.835	0	0	0	0	0	0	0	0	0	0	0	0	881.033	0	0	0	0	0	0	4790.55	0	0	0	0	0	0	0	0	0	0	0
HMF003673	HMF003673A	0	606.421	1250.71	0	0	0	0	2354.69	0	0	0	0	314.09	0	0	0	268.965	1551.8	0	0	0	0	0	0	0	0	0	0	0	1019.37	0	0	0	0	0	0	0	0	0	0	0	0	0	0	0	0	0	0
HMF000110	HMF000110A	1310.07	835.345	1570.78	0	759.356	0	0	1573	0	0	0	0	394.471	0	0	0	387.269	1389.08	0	0	0	0	0	0	0	0	0	0	0	849.3	0	0	0	0	0	0	998.327	0	0	0	0	0	0	0	0	0	0	0
HMF001166	HMF001166A	702.542	143.616	142.483	0	407.216	0	0	709.542	0	0	0	0	35.7817	0	0	0	0	146.127	0	0	0	0	0	0	0	0	0	0	0	537.304	0	0	0	0	0	0	498.136	0	0	0	0	0	0	0	0	0	0	0
HMF001511	HMF001511A	850.871	0	2150.56	0	493.192	0	0	5617.35	0	0	0	0	540.07	0	0	0	671.281	1534.14	0	0	0	0	0	0	0	0	0	0	0	1971.83	0	0	0	0	0	0	2889.71	0	0	0	0	0	0	0	0	0	0	0
HMF001199	HMF001199A	1077.49	0	127.362	0	624.547	0	0	261.89	0	0	0	0	31.9844	0	0	0	274.96	259.377	0	0	0	0	0	0	0	0	0	0	0	408.167	0	0	0	0	0	0	607.224	0	0	0	0	0	0	0	0	0	0	0
HMF001045	HMF001045B	967.78	0	1094.06	0	560.956	0	0	281.359	0	0	0	0	274.753	0	0	0	176.912	0	0	0	0	0	0	0	0	0	0	0	0	409.795	0	0	0	0	0	0	1049.48	0	0	0	0	0	0	0	0	0	0	0
HMF000185	HMF000185A	697.259	0	0	0	404.153	0	0	584.645	0	0	0	0	0	0	0	0	0	205.617	0	0	0	0	0	0	0	0	0	0	0	261.604	0	0	0	0	0	0	143.684	0	0	0	0	0	0	0	0	0	0	0
HMF000263	HMF000263A	343.118	105	49.1555	0	198.882	0	0	127	0	0	0	0	12.3445	0	0	0	0	83	0	0	0	0	0	0	0	0	0	0	0	228	0	0	0	0	0	0	69	0	0	0	0	0	0	0	0	0	0	0
HMF002149	HMF002149A	1034.18	243.073	420.081	0	599.446	0	0	173.196	0	0	0	0	105.495	0	0	0	78.3623	551.032	0	0	0	0	0	0	0	0	0	0	0	319.439	0	0	0	0	0	0	175.691	0	0	0	0	0	0	0	0	0	0	0
HMF000305	HMF000305A	676.026	215.868	1668	0	391.846	0	0	2275.33	0	0	0	0	418.886	0	0	0	736.841	374.902	0	0	0	0	0	0	0	0	0	0	0	554.874	0	0	0	0	0	0	538.423	0	0	0	0	0	0	0	0	0	0	0
HMF003201	HMF003201A	435.846	0	0	0	252.63	0	0	0	0	0	0	0	0	0	0	0	97.1377	401.068	0	0	0	0	0	0	0	0	0	0	0	106.651	0	0	0	0	0	0	0	0	0	0	0	0	0	0	0	0	0	0
HMF003674	HMF003674A	357.474	6095.02	2216.73	0	207.203	0	0	0	0	0	0	0	556.688	0	0	0	0	456.739	0	0	0	0	0	0	0	0	0	0	0	228.37	0	0	0	0	0	0	1137.35	0	0	0	0	0	0	0	0	0	0	0
HMF001068	HMF001068A	441.366	317.362	406.255	0	255.83	0	0	1202.48	0	0	0	0	102.023	0	0	0	309.365	802.65	0	0	0	0	0	0	0	0	0	0	0	563.754	0	0	0	0	0	0	186.919	0	0	0	0	0	0	0	0	0	0	0
HMF001999	HMF001999A	0	14601.1	709.606	0	0	0	0	0	0	0	0	0	178.204	0	0	0	306.107	0	0	0	0	0	0	0	0	0	0	0	0	0	0	0	0	0	0	0	0	0	0	0	0	0	0	0	0	0	0	0
HMF002166	HMF002166A	0	114310	0	0	0	0	0	0	0	0	0	0	0	0	0	0	0	0	0	0	0	0	0	0	0	0	0	0	0	240540	0	0	0	0	0	0	0	0	0	0	0	0	0	0	0	0	0	0
HMF001918	HMF001918A	869.036	6721.97	430.264	0	503.721	0	0	0	0	0	0	0	108.052	0	0	0	0	862.405	0	0	0	0	0	0	0	0	0	0	0	0	0	0	0	0	0	0	0	0	0	0	0	0	0	0	0	0	0	0
HMF001044	HMF001044A	264.133	914.914	922.974	0	153.1	0	0	3072.53	0	0	0	0	231.787	0	0	0	1532.52	740.026	0	0	0	0	0	0	0	0	0	0	0	759.514	0	0	0	0	0	0	777.502	0	0	0	0	0	0	0	0	0	0	0
HMF000715	HMF000715A	445.005	309.535	591.376	0	257.939	0	0	1986.52	0	0	0	0	148.513	0	0	0	185.721	582.126	0	0	0	0	0	0	0	0	0	0	0	473.789	0	0	0	0	0	0	347.478	0	0	0	0	0	0	0	0	0	0	0
HMF001647	HMF001647A	532.14	319.673	506.603	0	308.445	0	0	0	0	0	0	0	127.223	0	0	0	208.766	535.465	0	0	0	0	0	0	0	0	0	0	0	346.773	0	0	0	0	0	0	656.911	0	0	0	0	0	0	0	0	0	0	0
HMF001362	HMF001362A	1418.51	0	2083.72	0	822.212	0	0	1823.46	0	0	0	0	523.286	0	0	0	695.102	1343.73	0	0	0	0	0	0	0	0	0	0	0	3154.7	0	0	0	0	0	0	1004.93	0	0	0	0	0	0	0	0	0	0	0
HMF001343	HMF001343A	567.206	618.938	516.806	0	328.771	0	0	2659.78	0	0	0	0	129.786	0	0	0	6546.87	0	0	0	0	0	0	0	0	0	0	0	0	462.57	0	0	0	0	0	0	1653.18	0	0	0	0	0	0	0	0	0	0	0
HMF001082	HMF001082A	778.434	0	320.026	0	451.205	0	0	303.541	0	0	0	0	80.3682	0	0	0	174.236	487.762	0	0	0	0	0	0	0	0	0	0	0	307.035	0	0	0	0	0	0	631.544	0	0	0	0	0	0	0	0	0	0	0
HMF002708	HMF002708A	490.48	0	334.866	0	284.298	0	0	1247.36	0	0	0	0	84.0951	0	0	0	238.547	475.591	0	0	0	0	0	0	0	0	0	0	0	449.03	0	0	0	0	0	0	245.563	0	0	0	0	0	0	0	0	0	0	0
HMF000056	HMF000056A	201.586	0	1301.74	0	116.845	0	0	4187.1	0	0	0	0	326.907	0	0	0	1951.58	1871.1	0	0	0	0	0	0	0	0	0	0	0	962.792	0	0	0	0	0	0	2788.4	0	0	0	0	0	0	0	0	0	0	0
HMF000977	HMF000977A	4386.05	0	15622	0	2542.29	0	0	10650.9	0	0	0	0	3923.16	0	0	0	7996.08	2183.02	0	0	0	0	0	0	0	0	0	0	0	0	0	0	0	0	0	0	11414.5	0	0	0	0	0	0	0	0	0	0	0
HMF001045	HMF001045A	1026.81	0	1046.16	0	595.171	0	0	211.563	0	0	0	0	262.723	0	0	0	165.049	211.062	0	0	0	0	0	0	0	0	0	0	0	459.136	0	0	0	0	0	0	1045.31	0	0	0	0	0	0	0	0	0	0	0
HMF000305	HMF000305B	525.832	236.534	1522.44	0	304.789	0	0	1707.25	0	0	0	0	382.332	0	0	0	1018.15	304.544	0	0	0	0	0	0	0	0	0	0	0	437.063	0	0	0	0	0	0	447.065	0	0	0	0	0	0	0	0	0	0	0
HMF002764	HMF002764A	818.329	567.922	1210.47	0	0	0	0	667.584	0	0	0	0	846.875	0	0	0	355.577	570.426	0	0	0	0	0	0	0	0	0	0	0	874.42	0	0	0	0	0	666.582	841.867	0	894.953	0	0	0	0	0	0	0	0	0
HMF001423	HMF001423C	300.682	286.697	4338.91	0	0	0	0	4551.19	0	0	0	0	523.946	0	0	0	314.168	1303.12	0	0	0	0	0	0	0	0	0	0	0	574.892	0	0	0	0	0	1337.58	808.645	0	784.17	0	0	0	0	0	0	0	0	0
HMF003422	HMF003422A	702.097	363.274	458.084	0	0	0	0	366.767	0	0	0	0	235.03	0	0	0	0	763.474	0	0	0	0	0	0	0	0	0	0	0	490.021	0	0	0	0	0	324.352	174.152	0	327.346	0	0	0	0	0	0	0	0	0
HMF001916	HMF001916C	0	1160.75	2479.83	0	0	0	0	2330.49	0	0	0	0	1855	0	0	0	316.659	699.248	0	0	0	0	0	0	0	0	0	0	0	1299.1	0	0	0	0	0	963.963	628.824	0	1689.18	0	0	0	0	0	0	0	0	0
HMF002324	HMF002324A	503.829	1886.6	1494.96	0	0	0	0	5478.01	0	0	0	0	753.239	0	0	0	358.089	998.142	0	0	0	0	0	0	0	0	0	0	0	1988.77	0	0	0	0	0	1271.09	413.18	0	960.08	0	0	0	0	0	0	0	0	0
HMF003684	HMF003684A	270.082	215.065	733.723	0	0	0	0	1243.38	0	0	0	0	265.581	0	0	0	3862.68	221.067	0	0	0	0	0	0	0	0	0	0	0	508.155	0	0	0	0	0	0	581.177	0	0	0	0	0	0	0	0	0	0	0
HMF001401	HMF001401A	413.163	526.619	109.44	0	0	0	0	0	0	0	0	0	94.3798	0	0	0	0	237.456	0	0	0	0	0	0	0	0	0	0	0	429.227	0	0	0	0	0	85.8455	0	0	133.035	0	0	0	0	0	0	0	0	0
HMF001390	HMF001390A	720.428	2786.29	331.737	0	0	0	0	0	0	0	0	0	2122.81	0	0	0	0	808.858	0	0	0	0	0	0	0	0	0	0	0	587.533	0	0	0	0	0	398.184	286.273	0	550.563	0	0	0	0	0	0	0	0	0
HMF002735	HMF002735A	477.85	3226.99	860.73	0	0	0	0	468.353	0	0	0	0	7235.73	0	0	0	320.4	324.898	0	0	0	0	0	0	0	0	0	0	0	598.812	0	0	0	0	0	0	269.915	0	441.862	0	0	0	0	0	0	0	0	0
HMF000987	HMF000987A	1371.67	0	583.795	0	0	0	0	2596.14	0	0	0	0	144.701	0	0	0	174.639	758.434	0	0	0	0	0	0	0	0	0	0	0	3500.27	0	0	0	0	0	0	232.52	0	575.312	0	0	0	0	0	0	0	0	0
HMF003586	HMF003586A	950.073	4538.35	1711.13	0	0	0	0	2333.68	0	0	0	0	4044.31	0	0	0	320.525	2141.66	0	0	0	0	0	0	0	0	0	0	0	681.552	0	0	0	0	0	1204.59	366.528	0	1299.6	0	0	0	0	0	0	0	0	0
HMF001774	HMF001774A	450.678	509.898	714.158	0	0	0	0	905.37	0	0	0	0	349.3	0	0	0	117.939	335.75	0	0	0	0	0	0	0	0	0	0	0	1349.52	0	0	0	0	0	415.045	490.325	0	1078.01	0	0	0	0	0	0	0	0	0
HMF003726	HMF003726A	417.507	130.815	89.7163	0	0	0	0	165.399	0	0	0	0	59.1426	0	0	0	0	496.698	0	0	0	0	0	0	0	0	0	0	0	288.195	0	0	0	0	0	204.493	108.762	0	305.236	0	0	0	0	0	0	0	0	0
HMF000273	HMF000273A	1040.42	221.09	620.752	0	0	0	0	484.196	0	0	0	0	177.072	0	0	0	119.548	334.135	0	0	0	0	0	0	0	0	0	0	0	650.764	0	0	0	0	0	330.134	367.149	0	586.738	0	0	0	0	0	0	0	0	0
HMF003399	HMF003399A	434.95	503.943	338.461	0	0	0	0	317.964	0	0	0	0	525.44	0	0	0	0	410.953	0	0	0	0	0	0	0	0	0	0	0	852.403	0	0	0	0	0	212.476	244.472	0	480.945	0	0	0	0	0	0	0	0	0
HMF000922	HMF000922A	0	44411.3	0	0	0	0	0	0	0	0	0	0	35845.3	0	0	0	0	1434.83	0	0	0	0	0	0	0	0	0	0	0	0	0	0	0	0	0	0	0	0	0	0	0	0	0	0	0	0	0	0
HMF002560	HMF002560A	546.475	316.695	378.636	0	0	0	0	519.5	0	0	0	0	0	0	0	0	89.414	356.657	0	0	0	0	0	0	0	0	0	0	0	699.328	0	0	0	0	0	224.284	391.124	0	1092.95	0	0	0	0	0	0	0	0	0
HMF002270	HMF002270A	715.442	402.436	0	0	0	0	0	0	0	0	0	0	198.455	0	0	0	1002.32	5291.96	0	0	0	0	0	0	0	0	0	0	0	0	0	0	0	0	0	1909.19	1848.9	0	3957.04	0	0	0	0	0	0	0	0	0
HMF000769	HMF000769A	430.851	172.34	557.601	0	0	0	0	0	0	0	0	0	252.499	0	0	0	106.21	466.922	0	0	0	0	0	0	0	0	0	0	0	334.661	0	0	0	0	0	164.325	257.509	0	239.974	0	0	0	0	0	0	0	0	0
HMF000710	HMF000710A	888.176	806.701	0	0	0	0	0	135.791	0	0	0	0	85.4982	0	0	0	0	206.202	0	0	0	0	0	0	0	0	0	0	0	661.354	0	0	0	0	0	143.335	129.756	0	274.6	0	0	0	0	0	0	0	0	0
HMF002358	HMF002358A	497.675	348.021	356.558	0	0	0	0	0	0	0	0	0	176.773	0	0	0	330.444	1212.8	0	0	0	0	0	0	0	0	0	0	0	0	0	0	0	0	0	547.895	584.555	0	1014.43	0	0	0	0	0	0	0	0	0
HMF001585	HMF001585A	1249.72	724.21	486.477	0	0	0	0	777.262	0	0	0	0	248.243	0	0	0	505.495	2386.84	0	0	0	0	0	0	0	0	0	0	0	1160.64	0	0	0	0	0	1107.59	215.211	0	830.314	0	0	0	0	0	0	0	0	0
HMF001764	HMF001764A	658.668	257.284	103.711	0	0	0	0	215.401	0	0	0	0	75.2906	0	0	0	0	238.836	0	0	0	0	0	0	0	0	0	0	0	863.598	0	0	0	0	0	0	286.204	0	576.895	0	0	0	0	0	0	0	0	0
HMF000761	HMF000761A	497.84	465.481	1496.51	0	0	0	0	2821.26	0	0	0	0	520.741	0	0	0	245.933	340.523	0	0	0	0	0	0	0	0	0	0	0	855.29	0	0	0	0	0	570.027	748.752	0	1004.64	0	0	0	0	0	0	0	0	0
HMF000577	HMF000577A	521.041	923.301	1399.43	0	0	0	0	2153.54	0	0	0	0	1039.59	0	0	0	355.845	1005.65	0	0	0	0	0	0	0	0	0	0	0	1336.54	0	0	0	0	0	987.184	569.452	0	850.435	0	0	0	0	0	0	0	0	0
HMF001736	HMF001736A	508.367	418.802	269.695	0	0	0	0	308.223	0	0	0	0	162.117	0	0	0	72.052	510.869	0	0	0	0	0	0	0	0	0	0	0	901.151	0	0	0	0	0	340.246	314.227	0	348.252	0	0	0	0	0	0	0	0	0
HMF000411	HMF000411B	667.804	5732.82	1508.06	0	0	0	0	3912.35	0	0	0	0	8470.51	0	0	0	2076.89	704.793	0	0	0	0	0	0	0	0	0	0	0	1388.09	0	0	0	0	0	525.346	574.331	0	0	0	0	0	0	0	0	0	0	0
HMF000331	HMF000331A	661.828	1394.46	0	0	0	0	0	0	0	0	0	0	151.146	0	0	0	0	554.871	0	0	0	0	0	0	0	0	0	0	0	808.455	0	0	0	0	0	404.73	404.73	0	924.451	0	0	0	0	0	0	0	0	0
HMF003314	HMF003314A	1021.45	1080.5	738.685	0	0	0	0	1685.06	0	0	0	0	1272.18	0	0	0	251.233	444.412	0	0	0	0	0	0	0	0	0	0	0	950.882	0	0	0	0	0	288.768	275.756	0	619.074	0	0	0	0	0	0	0	0	0
HMF003113	HMF003113A	1127.06	423.335	703.726	0	0	0	0	704.226	0	0	0	0	255.401	0	0	0	1494.92	251.902	0	0	0	0	0	0	0	0	0	0	0	992.114	0	0	0	0	0	406.342	445.327	0	903.648	0	0	0	0	0	0	0	0	0
HMF001031	HMF001031A	544.155	1589.45	300.585	0	0	0	0	636.681	0	0	0	0	1226.35	0	0	0	0	1524.43	0	0	0	0	0	0	0	0	0	0	0	382.609	0	0	0	0	0	389.611	167.047	0	219.562	0	0	0	0	0	0	0	0	0
HMF000632	HMF000632A	711.944	21497.5	0	0	0	0	0	0	0	0	0	0	23384.5	0	0	0	0	718.954	0	0	0	0	0	0	0	0	0	0	0	0	0	0	0	0	0	0	0	0	0	0	0	0	0	0	0	0	0	0
HMF002080	HMF002080A	493.825	3735.74	1030.22	0	0	0	0	433.224	0	0	0	0	6954.12	0	0	0	0	312.022	0	0	0	0	0	0	0	0	0	0	0	573.959	0	0	0	0	0	0	390.653	0	379.635	0	0	0	0	0	0	0	0	0
HMF001244	HMF001244A	1169.63	637.981	1472.57	0	0	0	0	1768.49	0	0	0	0	339.053	0	0	0	1202.73	1146.06	0	0	0	0	0	0	0	0	0	0	0	1703.29	0	0	0	0	0	656.538	717.728	0	781.928	0	0	0	0	0	0	0	0	0
HMF001540	HMF001540A	1116.59	20922.1	498.764	0	0	0	0	0	0	0	0	0	4808.05	0	0	0	0	1030.05	0	0	0	0	0	0	0	0	0	0	0	0	0	0	0	0	0	0	0	0	568.801	0	0	0	0	0	0	0	0	0
HMF001851	HMF001851A	348.194	1003.62	3504.92	0	0	0	0	3225.16	0	0	0	0	2080.67	0	0	0	437.115	0	0	0	0	0	0	0	0	0	0	0	0	685.397	0	0	0	0	0	502.058	1338.82	0	404.144	0	0	0	0	0	0	0	0	0
HMF002935	HMF002935A	567.816	44.337	0	0	0	0	0	0	0	0	0	0	0	0	0	0	0	259.472	0	0	0	0	0	0	0	0	0	0	0	400.04	0	0	0	0	0	0	134.019	0	228.235	0	0	0	0	0	0	0	0	0
HMF003168	HMF003168A	480.785	205.766	136.513	0	0	0	0	207.759	0	0	0	0	118.577	0	0	0	231.673	230.179	0	0	0	0	0	0	0	0	0	0	0	499.219	0	0	0	0	0	176.371	187.332	0	328.827	0	0	0	0	0	0	0	0	0
HMF001428	HMF001428A	368.563	252.672	84.5557	0	0	0	0	197.462	0	0	0	0	0	0	0	0	35.8118	160.158	0	0	0	0	0	0	0	0	0	0	0	654.063	0	0	0	0	0	82.0688	259.636	0	284.008	0	0	0	0	0	0	0	0	0
HMF002642	HMF002642A	0	96227	0	0	0	0	0	0	0	0	0	0	71104.3	0	0	0	0	2226.54	0	0	0	0	0	0	0	0	0	0	0	0	0	0	0	0	0	0	0	0	0	0	0	0	0	0	0	0	0	0
HMF001163	HMF001163A	0	15145.7	570.838	0	0	0	0	1176.73	0	0	0	0	18760	0	0	0	0	1109.63	0	0	0	0	0	0	0	0	0	0	0	0	0	0	0	0	0	660.47	644.446	0	1617.38	0	0	0	0	0	0	0	0	0
HMF001654	HMF001654A	953.852	104.484	1092.83	0	0	0	0	728.887	0	0	0	0	282.456	0	0	0	154.976	476.426	0	0	0	0	0	0	0	0	0	0	0	928.856	0	0	0	0	0	556.913	320.95	0	834.37	0	0	0	0	0	0	0	0	0
HMF000021	HMF000021A	232.218	259.863	2206.57	0	0	0	0	2472.47	0	0	0	0	533.297	0	0	0	184.467	656.945	0	0	0	0	0	0	0	0	0	0	0	861.518	0	0	0	0	0	525.254	553.402	0	0	0	0	0	0	0	0	0	0	0
HMF002896	HMF002896A	0	0	0	0	0	0	0	0	0	0	0	0	0	0	0	0	2645.64	0	0	0	0	0	0	0	0	0	0	0	0	0	0	0	0	0	0	0	0	0	45895.9	0	0	0	0	0	0	0	0	0
HMF002454	HMF002454A	1160.92	2511.74	2375.17	0	0	0	0	924.645	0	0	0	0	3182.17	0	0	0	264.683	2022.26	0	0	0	0	0	0	0	0	0	0	0	733.734	0	0	0	0	0	1125.52	0	0	995.925	0	0	0	0	0	0	0	0	0
HMF003376	HMF003376A	0	852.505	2385.91	0	0	0	0	3407.02	0	0	0	0	961.069	0	0	0	342.703	940.557	0	0	0	0	0	0	0	0	0	0	0	886.525	0	0	0	0	0	1036.61	586.848	0	1258.25	0	0	0	0	0	0	0	0	0
HMF001933	HMF001933A	750.856	135.793	670.978	0	0	0	0	813.261	0	0	0	0	113.827	0	0	0	132.798	685.955	0	0	0	0	0	0	0	0	0	0	0	1044.91	0	0	0	0	0	564.64	375.927	0	946.059	0	0	0	0	0	0	0	0	0
HMF002568	HMF002568A	1150.62	2098.14	595.323	0	0	0	0	252.137	0	0	0	0	2320.76	0	0	0	0	313.67	0	0	0	0	0	0	0	0	0	0	0	658.857	0	0	0	0	0	201.109	282.653	0	352.691	0	0	0	0	0	0	0	0	0
HMF000415	HMF000415A	482.534	101.273	78.933	0	0	0	0	230.345	0	0	0	0	0	0	0	0	0	130.066	0	0	0	0	0	0	0	0	0	0	0	396.651	0	0	0	0	0	86.3795	127.087	0	268.074	0	0	0	0	0	0	0	0	0
HMF002655	HMF002655A	613.232	222.858	0	0	0	0	0	236.817	0	0	0	0	131.621	0	0	0	47.3635	216.875	0	0	0	0	0	0	0	0	0	0	0	555.898	0	0	0	0	0	0	151.065	0	273.711	0	0	0	0	0	0	0	0	0
HMF000624	HMF000624A	0	4354.1	2259.86	0	0	0	0	4665.39	0	0	0	0	4130.11	0	0	0	409.568	901.45	0	0	0	0	0	0	0	0	0	0	0	1815.87	0	0	0	0	0	880.497	813.649	0	532.289	0	0	0	0	0	0	0	0	0
HMF002579	HMF002579A	464.706	481.231	1491.77	0	0	0	0	1252.9	0	0	0	0	617.938	0	0	0	116.176	470.715	0	0	0	0	0	0	0	0	0	0	0	804.221	0	0	0	0	0	0	407.619	0	0	0	0	0	0	0	0	0	0	0
HMF000701	HMF000701A	1325.84	13490.6	873.881	0	0	0	0	618.623	0	0	0	0	15043.2	0	0	0	0	790.296	0	0	0	0	0	0	0	0	0	0	0	0	0	0	0	0	0	0	515.019	0	874.381	0	0	0	0	0	0	0	0	0
HMF002846	HMF002846A	406.591	821.212	496.442	0	0	0	0	549.65	0	0	0	0	1765.41	0	0	0	0	949.213	0	0	0	0	0	0	0	0	0	0	0	692.71	0	0	0	0	0	226.888	139.044	0	0	0	0	0	0	0	0	0	0	0
HMF000907	HMF000907A	401.05	252.273	97.5257	0	0	0	0	232.37	0	0	0	0	48.7628	0	0	0	48.2653	205.501	0	0	0	0	0	0	0	0	0	0	0	767.268	0	0	0	0	0	0	224.906	0	319.944	0	0	0	0	0	0	0	0	0
HMF001327	HMF001327A	0	7202.26	6121.27	0	0	0	0	0	0	0	0	0	66269.5	0	0	0	0	0	0	0	0	0	0	0	0	0	0	0	0	0	0	0	0	0	0	0	1244.06	0	1522.69	0	0	0	0	0	0	0	0	0
HMF000727	HMF000727A	537.892	170.989	397.312	0	0	0	0	244.768	0	0	0	0	145.565	0	0	0	89.7318	389.835	0	0	0	0	0	0	0	0	0	0	0	575.779	0	0	0	0	0	210.371	181.458	0	234.3	0	0	0	0	0	0	0	0	0
HMF003231	HMF003231A	247.928	539.754	2865.88	0	0	0	0	2478.28	0	0	0	0	623.561	0	0	0	285.341	1780.39	0	0	0	0	0	0	0	0	0	0	0	1368.34	0	0	0	0	0	1140.37	695.894	0	754.259	0	0	0	0	0	0	0	0	0
HMF001447	HMF001447A	489.311	4539.24	759.706	0	0	0	0	908.648	0	0	0	0	7696.52	0	0	0	0	0	0	0	0	0	0	0	0	0	0	0	0	839.675	0	0	0	0	0	0	464.82	0	606.265	0	0	0	0	0	0	0	0	0
HMF000719	HMF000719A	349.733	962.388	1716.73	0	0	0	0	1963.19	0	0	0	0	1416.39	0	0	0	1003.3	698.467	0	0	0	0	0	0	0	0	0	0	0	891.544	0	0	0	0	0	979.85	372.183	0	356.218	0	0	0	0	0	0	0	0	0
HMF002195	HMF002195A	543.751	868.199	1410.45	0	0	0	0	1405.94	0	0	0	0	1057.46	0	0	0	916.266	193.768	0	0	0	0	0	0	0	0	0	0	0	1182.63	0	0	0	0	0	0	734.515	0	0	0	0	0	0	0	0	0	0	0
HMF001138	HMF001138A	344.698	4091.85	686.394	0	0	0	0	931.535	0	0	0	0	8223.72	0	0	0	0	671.385	0	0	0	0	0	0	0	0	0	0	0	0	0	0	0	0	0	429.747	0	0	829.976	0	0	0	0	0	0	0	0	0
HMF003528	HMF003528A	884.841	1673.59	416.896	0	0	0	0	1885.79	0	0	0	0	1405.84	0	0	0	363.846	846.305	0	0	0	0	0	0	0	0	0	0	0	552.025	0	0	0	0	0	663.131	420.9	0	1402.83	0	0	0	0	0	0	0	0	0
HMF000514	HMF000514A	683.756	230.077	308.761	0	0	0	0	670.31	0	0	0	0	191.731	0	0	0	78.6843	720.609	0	0	0	0	0	0	0	0	0	0	0	691.724	0	0	0	0	0	288.841	178.285	0	443.222	0	0	0	0	0	0	0	0	0
HMF001459	HMF001459A	1019.35	217.535	269.783	0	0	0	0	375.285	0	0	0	0	0	0	0	0	62.2963	196.937	0	0	0	0	0	0	0	0	0	0	0	638.537	0	0	0	0	0	219.544	0	0	356.697	0	0	0	0	0	0	0	0	0
HMF004170	HMF004170A	1006.5	594.064	773.187	0	0	0	0	1419.43	0	0	0	0	327.137	0	0	0	190.663	226.788	0	0	0	0	0	0	0	0	0	0	0	1403.88	0	0	0	0	0	346.705	1308.05	0	2331.6	0	0	0	0	0	0	0	0	0
HMF003977	HMF003977A	668.15	4346.49	0	0	0	0	0	435.051	0	0	0	0	502.368	0	0	0	0	840.965	0	0	0	0	0	0	0	0	0	0	0	370.748	0	0	0	0	0	205.971	0	0	251.687	0	0	0	0	0	0	0	0	0
HMF004039	HMF004039A	528.75	521.753	3415.38	0	0	0	0	10927.8	0	0	0	0	878.584	0	0	0	4526.36	2142.99	0	0	0	0	0	0	0	0	0	0	0	4184.52	0	0	0	0	0	3051.06	801.621	0	721.159	0	0	0	0	0	0	0	0	0
HMF003956	HMF003956A	330.312	265.251	0	0	0	0	0	757.215	0	0	0	0	49.5468	0	0	0	0	0	0	0	0	0	0	0	0	0	0	0	0	477.951	0	0	0	0	0	387.366	0	0	272.257	0	0	0	0	0	0	0	0	0
HMF001298	HMF001298A	608.044	908.046	182.916	0	0	0	0	287.439	0	0	0	0	647.24	0	0	0	64.322	118.091	0	0	0	0	0	0	0	0	0	0	0	578.395	0	0	0	0	0	153.77	202.514	0	444.224	0	0	0	0	0	0	0	0	0
HMF001443	HMF001443A	884.284	6057.07	0	0	0	0	0	465.967	0	0	0	0	4177.15	0	0	0	0	669.608	0	0	0	0	0	0	0	0	0	0	0	0	0	0	0	0	0	0	238.752	0	503.084	0	0	0	0	0	0	0	0	0
HMF000997	HMF000997A	398.207	358.337	256.667	0	0	0	0	386.246	0	0	0	0	507.851	0	0	0	64.7896	226.265	0	0	0	0	0	0	0	0	0	0	0	399.204	0	0	0	0	0	172.939	193.372	0	270.123	0	0	0	0	0	0	0	0	0
HMF003072	HMF003072A	0	26213.6	737.579	0	0	0	0	0	0	0	0	0	21819.1	0	0	0	0	997.431	0	0	0	0	0	0	0	0	0	0	0	0	0	0	0	0	0	0	0	0	0	0	0	0	0	0	0	0	0	0
HMF003062	HMF003062B	1395.45	266.3	273.794	0	0	0	0	213.839	0	0	0	0	0	0	0	0	80.4396	641.018	0	0	0	0	0	0	0	0	0	0	0	721.958	0	0	0	0	0	229.827	194.854	0	581.563	0	0	0	0	0	0	0	0	0
HMF000085	HMF000085A	512.066	134.781	181.879	0	0	0	0	0	0	0	0	0	0	0	0	0	90.6888	448.935	0	0	0	0	0	0	0	0	0	0	0	445.427	0	0	0	0	0	327.181	294.112	0	807.682	0	0	0	0	0	0	0	0	0
HMF002765	HMF002765B	0	1996.51	2090.7	0	0	0	0	5072.2	0	0	0	0	2935.4	0	0	0	566.639	925.36	0	0	0	0	0	0	0	0	0	0	0	1851.72	0	0	0	0	0	991.493	744.496	0	882.273	0	0	0	0	0	0	0	0	0
HMF003771	HMF003771A	314.172	4788.49	572.901	0	0	0	0	0	0	0	0	0	2666.71	0	0	0	245.743	274.713	0	0	0	0	0	0	0	0	0	0	0	508.968	0	0	0	0	0	0	221.768	0	0	0	0	0	0	0	0	0	0	0
HMF003077	HMF003077A	526.584	306.34	134.149	0	0	0	0	107.119	0	0	0	0	0	0	0	0	0	185.205	0	0	0	0	0	0	0	0	0	0	0	423.469	0	0	0	0	0	88.5982	127.642	0	305.839	0	0	0	0	0	0	0	0	0
HMF002350	HMF002350B	0	1377.66	2302.6	0	0	0	0	5073.44	0	0	0	0	2160.88	0	0	0	373.584	1084.2	0	0	0	0	0	0	0	0	0	0	0	2025.67	0	0	0	0	0	1060.66	1023.6	0	1021.6	0	0	0	0	0	0	0	0	0
HMF002775	HMF002775A	0	1160.54	6507.33	0	0	0	0	4285.62	0	0	0	0	4770.51	0	0	0	2191.25	1260.92	0	0	0	0	0	0	0	0	0	0	0	2894.37	0	0	0	0	0	1363.29	2740.56	0	2878.39	0	0	0	0	0	0	0	0	0
HMF002042	HMF002042A	606.449	1507.63	1538.1	0	0	0	0	877.202	0	0	0	0	4355.54	0	0	0	317.711	1483.15	0	0	0	0	0	0	0	0	0	0	0	0	0	0	0	0	0	961.126	808.765	0	1089.01	0	0	0	0	0	0	0	0	0
HMF000295	HMF000295A	610.532	5913.31	215.511	0	0	0	0	466.524	0	0	0	0	0	0	0	0	0	0	0	0	0	0	0	0	0	0	0	0	0	1105.56	0	0	0	0	0	209.511	336.017	0	549.528	0	0	0	0	0	0	0	0	0
HMF001656	HMF001656A	0	80657.7	0	0	0	0	0	0	0	0	0	0	35567.9	0	0	0	0	0	0	0	0	0	0	0	0	0	0	0	0	0	0	0	0	0	0	0	0	0	0	0	0	0	0	0	0	0	0	0
HMF003753	HMF003753A	510.53	3737.22	0	0	0	0	0	697.541	0	0	0	0	180.011	0	0	0	0	1673.6	0	0	0	0	0	0	0	0	0	0	0	336.02	0	0	0	0	0	598.035	0	0	732.543	0	0	0	0	0	0	0	0	0
HMF003090	HMF003090A	553.213	0	201.671	0	0	0	0	1023.44	0	0	0	0	96.0578	0	0	0	435.026	1508.76	0	0	0	0	0	0	0	0	0	0	0	881.117	0	0	0	0	0	245.928	219.776	0	0	0	0	0	0	0	0	0	0	0
HMF001418	HMF001418A	1114.74	1305.12	712.429	0	0	0	0	0	0	0	0	0	364.231	0	0	0	0	808.121	0	0	0	0	0	0	0	0	0	0	0	860.726	0	0	0	0	0	238.478	359.722	0	530.063	0	0	0	0	0	0	0	0	0
HMF001473	HMF001473A	988.482	327.491	440.16	0	0	0	0	585.878	0	0	0	0	227.341	0	0	0	0	1062.09	0	0	0	0	0	0	0	0	0	0	0	488.733	0	0	0	0	0	533.3	0	0	826.239	0	0	0	0	0	0	0	0	0
HMF001940	HMF001940A	363.809	2441.22	379.301	0	0	0	0	594.188	0	0	0	0	1978.96	0	0	0	0	331.826	0	0	0	0	0	0	0	0	0	0	0	400.29	0	0	0	0	0	284.851	257.365	0	494.241	0	0	0	0	0	0	0	0	0
HMF000195	HMF000195B	384.737	271.727	1506.3	0	0	0	0	2199.93	0	0	0	0	552.997	0	0	0	204.925	483.684	0	0	0	0	0	0	0	0	0	0	0	1042.21	0	0	0	0	0	515.829	394.783	0	746.873	0	0	0	0	0	0	0	0	0
HMF002985	HMF002985A	1081.67	441.252	2190.79	0	0	0	0	815.618	0	0	0	0	863.038	0	0	0	237.098	806.134	0	0	0	0	0	0	0	0	0	0	0	645.406	0	0	0	0	0	675.356	823.605	0	2634.04	0	0	0	0	0	0	0	0	0
HMF002355	HMF002355A	7211.84	0	1564.12	0	0	0	0	3321.31	0	0	0	0	0	0	0	0	1270.5	998.393	0	0	0	0	0	0	0	0	0	0	0	0	0	0	0	0	0	15990.8	4306.69	0	1129.44	0	0	0	0	0	0	0	0	0
HMF002086	HMF002086A	906.974	2132.79	327.352	0	0	0	0	548.089	0	0	0	0	550.591	0	0	0	119.628	1281.88	0	0	0	0	0	0	0	0	0	0	0	617.163	0	0	0	0	0	698.25	0	0	648.697	0	0	0	0	0	0	0	0	0
HMF002307	HMF002307A	774.251	5445.27	222.072	0	0	0	0	343.612	0	0	0	0	4134.34	0	0	0	0	256.583	0	0	0	0	0	0	0	0	0	0	0	481.156	0	0	0	0	0	0	280.091	0	0	0	0	0	0	0	0	0	0	0
HMF000314	HMF000314A	1887.14	2175.56	593.288	0	0	0	0	310.366	0	0	0	0	1062.83	0	0	0	0	970.517	0	0	0	0	0	0	0	0	0	0	0	892.177	0	0	0	0	0	524.429	441.598	0	845.772	0	0	0	0	0	0	0	0	0
HMF003456	HMF003456A	1879.09	992.489	830.154	0	0	0	0	1007.97	0	0	0	0	488.003	0	0	0	0	2668.78	0	0	0	0	0	0	0	0	0	0	0	0	0	0	0	0	0	1763.2	552.937	0	1290.19	0	0	0	0	0	0	0	0	0
HMF001820	HMF001820A	337.6	385.686	139.248	0	0	0	0	212.879	0	0	0	0	106.69	0	0	0	53.0944	230.41	0	0	0	0	0	0	0	0	0	0	0	489.871	0	0	0	0	0	176.314	348.119	0	332.09	0	0	0	0	0	0	0	0	0
HMF000718	HMF000718A	950.531	330.032	409.159	0	0	0	0	487.285	0	0	0	0	143.732	0	0	0	185.298	893.94	0	0	0	0	0	0	0	0	0	0	0	974.069	0	0	0	0	0	310.5	450.225	0	763.229	0	0	0	0	0	0	0	0	0
HMF000713	HMF000713A	1771.21	902.559	971.872	0	0	0	0	550.511	0	0	0	0	632.29	0	0	0	0	1490.97	0	0	0	0	0	0	0	0	0	0	0	730.026	0	0	0	0	0	853.692	430.336	0	1191.78	0	0	0	0	0	0	0	0	0
HMF003392	HMF003392A	883.622	502.422	1017.37	0	0	0	0	779.43	0	0	0	0	853.065	0	0	0	179.83	636.167	0	0	0	0	0	0	0	0	0	0	0	845.051	0	0	0	0	0	374.688	546.002	0	1011.36	0	0	0	0	0	0	0	0	0
HMF002099	HMF002099A	678.95	20063.1	0	0	0	0	0	0	0	0	0	0	18568.5	0	0	0	0	1162.63	0	0	0	0	0	0	0	0	0	0	0	0	0	0	0	0	0	0	0	0	0	0	0	0	0	0	0	0	0	0
HMF001969	HMF001969A	476.756	2281.83	469.26	0	0	0	0	523.232	0	0	0	0	981.997	0	0	0	413.289	1102.44	0	0	0	0	0	0	0	0	0	0	0	694.645	0	0	0	0	0	493.747	385.303	0	971.503	0	0	0	0	0	0	0	0	0
HMF000962	HMF000962A	0	30620.2	0	0	0	0	0	1002.22	0	0	0	0	17449.3	0	0	0	0	1164.26	0	0	0	0	0	0	0	0	0	0	0	0	0	0	0	0	0	0	0	0	0	0	0	0	0	0	0	0	0	0
HMF000374	HMF000374A	527.846	177.785	0	0	0	0	0	239.384	0	0	0	0	0	0	0	0	0	187.3	0	0	0	0	0	0	0	0	0	0	0	581.432	0	0	0	0	0	0	238.883	0	301.483	0	0	0	0	0	0	0	0	0
HMF002272	HMF002272A	1126.57	870.554	1628.6	0	0	0	0	3252.7	0	0	0	0	1263.58	0	0	0	831.051	0	0	0	0	0	0	0	0	0	0	0	0	1324.58	0	0	0	0	0	18141.1	9756.6	0	2292.64	0	0	0	0	0	0	0	0	0
HMF002813	HMF002813A	1020.62	2303.3	1301.25	0	0	0	0	475.42	0	0	0	0	573.817	0	0	0	498.011	1013.09	0	0	0	0	0	0	0	0	0	0	0	713.381	0	0	0	0	0	839.892	314.269	0	1842.94	0	0	0	0	0	0	0	0	0
HMF001641	HMF001641A	876.732	0	693.415	0	0	0	0	433.385	0	0	0	0	150.439	0	0	0	84.6843	907.617	0	0	0	0	0	0	0	0	0	0	0	443.846	0	0	0	0	0	503.125	261.027	0	578.344	0	0	0	0	0	0	0	0	0
HMF002796	HMF002796A	1089.16	440.97	681.226	0	0	0	0	374.9	0	0	0	0	149.159	0	0	0	118.126	425.954	0	0	0	0	0	0	0	0	0	0	0	960.023	0	0	0	0	0	483.015	288.307	0	1087.16	0	0	0	0	0	0	0	0	0
HMF002743	HMF002743A	326.524	260.821	1903.39	0	0	0	0	3709.23	0	0	0	0	686.894	0	0	0	153.307	322.044	0	0	0	0	0	0	0	0	0	0	0	529.107	0	0	0	0	0	715.266	396.208	0	617.209	0	0	0	0	0	0	0	0	0
HMF002025	HMF002025A	185.978	502.44	2108.25	0	0	0	0	3870.54	0	0	0	0	557.933	0	0	0	244.971	1097.87	0	0	0	0	0	0	0	0	0	0	0	1630.8	0	0	0	0	0	910.891	573.931	0	859.397	0	0	0	0	0	0	0	0	0
HMF003518	HMF003518A	0	722.047	8057.1	0	0	0	0	11203	0	0	0	0	2931.72	0	0	0	1087.82	1006.26	0	0	0	0	0	0	0	0	0	0	0	4072.58	0	0	0	0	0	1530.16	2339.77	0	698.029	0	0	0	0	0	0	0	0	0
HMF000668	HMF000668A	1026.27	280.663	136.836	0	0	0	0	184.778	0	0	0	0	0	0	0	0	0	542.348	0	0	0	0	0	0	0	0	0	0	0	567.818	0	0	0	0	0	222.233	172.792	0	505.393	0	0	0	0	0	0	0	0	0
HMF000785	HMF000785A	1347.03	1380.57	625.212	0	0	0	0	0	0	0	0	0	1137.8	0	0	0	0	347.896	0	0	0	0	0	0	0	0	0	0	0	573.152	0	0	0	0	0	351.901	401.958	0	992.63	0	0	0	0	0	0	0	0	0
HMF003712	HMF003712A	331.436	162.214	357.471	0	0	0	0	642.846	0	0	0	0	87.1147	0	0	0	0	341.95	0	0	0	0	0	0	0	0	0	0	0	909.197	0	0	0	0	0	307.405	330.435	0	640.844	0	0	0	0	0	0	0	0	0
HMF000625	HMF000625A	418.302	225.624	508.152	0	0	0	0	201.164	0	0	0	0	127.787	0	0	0	96.3393	529.117	0	0	0	0	0	0	0	0	0	0	0	367.387	0	0	0	0	0	327.454	362.895	0	432.778	0	0	0	0	0	0	0	0	0
HMF000988	HMF000988A	1327.83	578.362	380.738	0	0	0	0	0	0	0	0	0	0	0	0	0	0	1670.55	0	0	0	0	0	0	0	0	0	0	0	603.378	0	0	0	0	0	961.102	236.148	0	560.851	0	0	0	0	0	0	0	0	0
HMF002359	HMF002359A	678.146	0	148.849	0	0	0	0	149.858	0	0	0	0	53.4848	0	0	0	0	219.994	0	0	0	0	0	0	0	0	0	0	0	565.627	0	0	0	0	0	107.474	237.654	0	403.659	0	0	0	0	0	0	0	0	0
HMF002196	HMF002196A	279.13	281.631	256.619	0	0	0	0	494.23	0	0	0	0	98.0456	0	0	0	200.593	604.781	0	0	0	0	0	0	0	0	0	0	0	565.763	0	0	0	0	0	464.216	312.645	0	740.345	0	0	0	0	0	0	0	0	0
HMF003701	HMF003701A	492.101	261.788	973.71	0	0	0	0	1236.5	0	0	0	0	378.693	0	0	0	151.377	2457.51	0	0	0	0	0	0	0	0	0	0	0	0	0	0	0	0	0	1118.09	209.33	0	732.905	0	0	0	0	0	0	0	0	0
HMF003519	HMF003519A	734.261	192.937	415.365	0	0	0	0	572.813	0	0	0	0	120.961	0	0	0	88.971	407.867	0	0	0	0	0	0	0	0	0	0	0	808.237	0	0	0	0	0	233.424	537.825	0	492.34	0	0	0	0	0	0	0	0	0
HMF003236	HMF003236A	534.575	3297.55	346.372	0	0	0	0	336.862	0	0	0	0	1476.09	0	0	0	0	529.569	0	0	0	0	0	0	0	0	0	0	0	281.803	0	0	0	0	0	166.679	350.877	0	484.521	0	0	0	0	0	0	0	0	0
HMF000734	HMF000734A	560.184	306.732	0	0	0	0	0	393.872	0	0	0	0	189.218	0	0	0	0	326.152	0	0	0	0	0	0	0	0	0	0	0	795.212	0	0	0	0	0	420.263	156.852	0	704.089	0	0	0	0	0	0	0	0	0
HMF004042	HMF004042A	624.812	142.957	308.907	0	0	0	0	281.915	0	0	0	0	78.9763	0	0	0	0	348.395	0	0	0	0	0	0	0	0	0	0	0	725.782	0	0	0	0	0	132.46	147.456	0	485.354	0	0	0	0	0	0	0	0	0
HMF004157	HMF004157A	0	205.626	2267.9	0	0	0	0	2855.69	0	0	0	0	648.975	0	0	0	660.51	327.497	0	0	0	0	0	0	0	0	0	0	0	340.536	0	0	0	0	0	676.559	1708.2	0	2851.18	0	0	0	0	0	0	0	0	0
HMF003992	HMF003992A	756.297	333.513	548.165	0	0	0	0	333.513	0	0	0	0	0	0	0	0	92.2802	1280.89	0	0	0	0	0	0	0	0	0	0	0	757.3	0	0	0	0	0	547.663	168.01	0	373.635	0	0	0	0	0	0	0	0	0
HMF000817	HMF000817A	1884.2	3646.51	935.105	0	0	0	0	0	0	0	0	0	3581.07	0	0	0	0	1082.46	0	0	0	0	0	0	0	0	0	0	0	383.133	0	0	0	0	0	786.747	299.214	0	1223.33	0	0	0	0	0	0	0	0	0
HMF002608	HMF002608A	490.264	6373.93	604.325	0	0	0	0	585.315	0	0	0	0	4520.93	0	0	0	0	618.333	0	0	0	0	0	0	0	0	0	0	0	525.783	0	0	0	0	0	313.168	249.634	0	481.259	0	0	0	0	0	0	0	0	0
HMF002360	HMF002360A	355.314	231.53	191.939	0	0	0	0	114.262	0	0	0	0	113.259	0	0	0	73.1675	196.45	0	0	0	0	0	0	0	0	0	0	0	574.816	0	0	0	0	0	0	212.487	0	271.121	0	0	0	0	0	0	0	0	0
HMF002573	HMF002573B	502.065	18279.4	0	0	0	0	0	0	0	0	0	0	10025.3	0	0	0	0	564.573	0	0	0	0	0	0	0	0	0	0	0	593.577	0	0	0	0	0	0	0	0	0	0	0	0	0	0	0	0	0	0
HMF000309	HMF000309A	1485.21	299.154	2141.34	0	0	0	0	464.569	0	0	0	0	578.701	0	0	0	385.13	1485.72	0	0	0	0	0	0	0	0	0	0	0	713.949	0	0	0	0	0	602.331	1021.15	0	1038.74	0	0	0	0	0	0	0	0	0
HMF000515	HMF000515A	789.664	317.761	362.158	0	0	0	0	222.982	0	0	0	0	163.62	0	0	0	63.8516	241.439	0	0	0	0	0	0	0	0	0	0	0	488.365	0	0	0	0	0	148.654	264.385	0	378.121	0	0	0	0	0	0	0	0	0
HMF003368	HMF003368A	1020.24	173.466	737.481	0	0	0	0	626.182	0	0	0	0	247.164	0	0	0	185.498	1381.71	0	0	0	0	0	0	0	0	0	0	0	564.516	0	0	0	0	0	634.705	279.751	0	292.285	0	0	0	0	0	0	0	0	0
HMF000889	HMF000889B	667.849	18605.3	615.861	0	0	0	0	0	0	0	0	0	20385.4	0	0	0	0	1195.23	0	0	0	0	0	0	0	0	0	0	0	0	0	0	0	0	0	958.284	0	0	1123.25	0	0	0	0	0	0	0	0	0
HMF002267	HMF002267A	500.012	77.9697	275.661	0	0	0	0	144.37	0	0	0	0	71.4303	0	0	0	52.8182	261.073	0	0	0	0	0	0	0	0	0	0	0	330.994	0	0	0	0	0	0	276.667	0	536.733	0	0	0	0	0	0	0	0	0
HMF000857	HMF000857A	218.799	761.281	185.176	0	0	0	0	338.236	0	0	0	0	622.775	0	0	0	61.2237	505.346	0	0	0	0	0	0	0	0	0	0	0	503.841	0	0	0	0	0	308.627	111.909	0	488.786	0	0	0	0	0	0	0	0	0
HMF003670	HMF003670A	585.884	60.3336	101.719	0	0	0	0	0	0	0	0	0	49.3638	0	0	0	0	269.756	0	0	0	0	0	0	0	0	0	0	0	396.905	0	0	0	0	0	161.056	107.204	0	195.461	0	0	0	0	0	0	0	0	0
HMF000192	HMF000192A	1150.96	432.051	772.165	0	0	0	0	0	0	0	0	0	196.935	0	0	0	224.566	568.197	0	0	0	0	0	0	0	0	0	0	0	807.834	0	0	0	0	0	524.489	471.739	0	2456.66	0	0	0	0	0	0	0	0	0
HMF001478	HMF001478A	1141.55	442.406	498.457	0	0	0	0	613.563	0	0	0	0	190.174	0	0	0	0	2350.66	0	0	0	0	0	0	0	0	0	0	0	708.65	0	0	0	0	0	733.673	132.121	0	0	0	0	0	0	0	0	0	0	0
HMF001730	HMF001730A	384.723	110.564	159.593	0	0	0	0	163.595	0	0	0	0	46.0267	0	0	0	70.0407	213.124	0	0	0	0	0	0	0	0	0	0	0	686.399	0	0	0	0	0	0	228.132	0	438.255	0	0	0	0	0	0	0	0	0
HMF001725	HMF001725A	1132.05	343.712	142.381	0	0	0	0	396.668	0	0	0	0	154.87	0	0	0	0	500.581	0	0	0	0	0	0	0	0	0	0	0	424.145	0	0	0	0	0	220.815	114.904	0	691.921	0	0	0	0	0	0	0	0	0
HMF002756	HMF002756A	715.695	352.088	0	0	0	0	0	165.777	0	0	0	0	0	0	0	0	0	155.259	0	0	0	0	0	0	0	0	0	0	0	659.101	0	0	0	0	0	170.284	190.318	0	255.927	0	0	0	0	0	0	0	0	0
HMF003783	HMF003783A	1020.55	401.2	646.434	0	0	0	0	988.959	0	0	0	0	483.447	0	0	0	732.692	320.459	0	0	0	0	0	0	0	0	0	0	0	728.179	0	0	0	0	0	370.107	383.648	0	441.321	0	0	0	0	0	0	0	0	0
HMF002244	HMF002244A	475.184	124.31	764.906	0	0	0	0	1302.24	0	0	0	0	170.926	0	0	0	109.272	247.617	0	0	0	0	0	0	0	0	0	0	0	394.984	0	0	0	0	0	406.011	253.131	0	568.416	0	0	0	0	0	0	0	0	0
HMF001271	HMF001271A	425.483	175.873	254.094	0	0	0	0	235.161	0	0	0	0	125.552	0	0	0	72.2424	444.415	0	0	0	0	0	0	0	0	0	0	0	651.676	0	0	0	0	0	220.713	140.499	0	479.291	0	0	0	0	0	0	0	0	0
HMF003754	HMF003754A	434.209	169.361	419.634	0	0	0	0	424.157	0	0	0	0	327.667	0	0	0	0	225.648	0	0	0	0	0	0	0	0	0	0	0	562.36	0	0	0	0	0	146.244	289.472	0	189.966	0	0	0	0	0	0	0	0	0
HMF003449	HMF003449A	1424.68	420.725	769.169	0	0	0	0	645.045	0	0	0	0	222.326	0	0	0	803.066	2562.73	0	0	0	0	0	0	0	0	0	0	0	818.021	0	0	0	0	0	1094.68	493.006	0	1305.54	0	0	0	0	0	0	0	0	0
HMF003001	HMF003001A	3428.78	0	0	0	0	0	0	1751.62	0	0	0	0	97.4511	0	0	0	0	0	0	0	0	0	0	0	0	0	0	0	0	392.303	0	0	0	0	0	0	303.847	0	754.621	0	0	0	0	0	0	0	0	0
HMF003374	HMF003374A	989.906	34939.8	0	0	0	0	0	0	0	0	0	0	18234	0	0	0	0	0	0	0	0	0	0	0	0	0	0	0	0	0	0	0	0	0	0	0	0	0	0	0	0	0	0	0	0	0	0	0
HMF000941	HMF000941A	1028.41	172.404	1407.8	0	0	0	0	507.689	0	0	0	0	296.695	0	0	0	157.87	1225.37	0	0	0	0	0	0	0	0	0	0	0	470.101	0	0	0	0	0	539.263	932.184	0	519.216	0	0	0	0	0	0	0	0	0
HMF002073	HMF002073A	898.567	193.089	216.219	0	0	0	0	0	0	0	0	0	0	0	0	0	61.3459	451.043	0	0	0	0	0	0	0	0	0	0	0	669.777	0	0	0	0	0	209.682	168.953	0	551.108	0	0	0	0	0	0	0	0	0
HMF003005	HMF003005A	0	0	2375.91	0	0	0	0	16183.7	0	0	0	0	1817.11	0	0	0	0	14212.9	0	0	0	0	0	0	0	0	0	0	0	0	0	0	0	0	0	3475.49	0	0	0	0	0	0	0	0	0	0	0	0
HMF002657	HMF002657A	0	19385.2	1594.51	0	0	0	0	0	0	0	0	0	37670.8	0	0	0	0	0	0	0	0	0	0	0	0	0	0	0	0	0	0	0	0	0	0	0	0	0	0	0	0	0	0	0	0	0	0	0
HMF003362	HMF003362A	452.639	0	524.082	0	0	0	0	567.048	0	0	0	0	139.889	0	0	0	2025.89	909.275	0	0	0	0	0	0	0	0	0	0	0	245.804	0	0	0	0	0	255.796	261.791	0	0	0	0	0	0	0	0	0	0	0
HMF002432	HMF002432A	2220.12	1704.78	716.167	0	0	0	0	0	0	0	0	0	0	0	0	0	0	1422.82	0	0	0	0	0	0	0	0	0	0	0	433.707	0	0	0	0	0	954.555	482.286	0	1058.22	0	0	0	0	0	0	0	0	0
HMF002179	HMF002179A	966.164	236.908	702.71	0	0	0	0	428.739	0	0	0	0	0	0	0	0	169.792	930.603	0	0	0	0	0	0	0	0	0	0	0	1223.61	0	0	0	0	0	597.529	923.09	0	1267.68	0	0	0	0	0	0	0	0	0
HMF001533	HMF001533A	1351.24	536.991	1418.8	0	0	0	0	1514.39	0	0	0	0	543.497	0	0	0	196.179	887.312	0	0	0	0	0	0	0	0	0	0	0	840.269	0	0	0	0	0	463.424	296.271	0	695.636	0	0	0	0	0	0	0	0	0
HMF002744	HMF002744A	558.152	306.309	216.365	0	0	0	0	145.909	0	0	0	0	129.919	0	0	0	59.9626	240.35	0	0	0	0	0	0	0	0	0	0	0	604.623	0	0	0	0	0	123.923	273.329	0	545.16	0	0	0	0	0	0	0	0	0
HMF000558	HMF000558A	297.296	1249.85	873.339	0	0	0	0	1019.73	0	0	0	0	1952.73	0	0	0	162.435	378.012	0	0	0	0	0	0	0	0	0	0	0	946.034	0	0	0	0	0	227.108	812.677	0	1787.79	0	0	0	0	0	0	0	0	0
HMF003509	HMF003509A	910.865	10828.3	1763.17	0	0	0	0	1594.01	0	0	0	0	11313.7	0	0	0	0	1980.88	0	0	0	0	0	0	0	0	0	0	0	1237.68	0	0	0	0	0	1225.16	0	0	1311.25	0	0	0	0	0	0	0	0	0
HMF002461	HMF002461A	492.492	447.857	3102.4	0	0	0	0	1956.93	0	0	0	0	1509.57	0	0	0	278.845	492.994	0	0	0	0	0	0	0	0	0	0	0	907.249	0	0	0	0	0	279.848	992.508	0	429.301	0	0	0	0	0	0	0	0	0
HMF001061	HMF001061A	1324.64	2650.28	723.665	0	0	0	0	364.576	0	0	0	0	3045.78	0	0	0	0	1095.72	0	0	0	0	0	0	0	0	0	0	0	348.117	0	0	0	0	0	577.037	532.151	0	894.233	0	0	0	0	0	0	0	0	0
HMF003252	HMF003252A	729.362	8258.43	1132.11	0	0	0	0	1020.41	0	0	0	0	9920.53	0	0	0	0	833.056	0	0	0	0	0	0	0	0	0	0	0	678.267	0	0	0	0	0	604.129	625.168	0	611.142	0	0	0	0	0	0	0	0	0
HMF001902	HMF001902B	884.462	77.1678	0	0	0	0	0	303.725	0	0	0	0	0	0	0	0	0	497.139	0	0	0	0	0	0	0	0	0	0	0	566.887	0	0	0	0	0	0	147.41	0	302.241	0	0	0	0	0	0	0	0	0
HMF000818	HMF000818A	600.638	2776.45	746.793	0	0	0	0	500.031	0	0	0	0	2409.06	0	0	0	0	386.911	0	0	0	0	0	0	0	0	0	0	0	523.556	0	0	0	0	0	416.943	299.318	0	1108.18	0	0	0	0	0	0	0	0	0
HMF000144	HMF000144A	1000.71	904.739	537.845	0	0	0	0	294.415	0	0	0	0	435.874	0	0	0	151.956	466.866	0	0	0	0	0	0	0	0	0	0	0	636.817	0	0	0	0	0	559.839	738.787	0	1217.15	0	0	0	0	0	0	0	0	0
HMF003446	HMF003446A	841.529	2333.58	2037.57	0	0	0	0	1122.54	0	0	0	0	3033.6	0	0	0	299.01	835.528	0	0	0	0	0	0	0	0	0	0	0	1299.04	0	0	0	0	0	861.029	802.027	0	1280.54	0	0	0	0	0	0	0	0	0
HMF003498	HMF003498A	412.106	349.166	5759.49	0	0	0	0	5752	0	0	0	0	1778.3	0	0	0	566.458	745.786	0	0	0	0	0	0	0	0	0	0	0	1900.18	0	0	0	0	0	1019.52	1757.32	0	861.676	0	0	0	0	0	0	0	0	0
HMF000077	HMF000077A	760.916	189.479	290.968	0	0	0	0	297.967	0	0	0	0	157.483	0	0	0	105.988	1094.38	0	0	0	0	0	0	0	0	0	0	0	575.437	0	0	0	0	0	452.45	247.973	0	365.96	0	0	0	0	0	0	0	0	0
HMF000119	HMF000119A	1068.85	399.499	788.445	0	0	0	0	377.891	0	0	0	0	616.585	0	0	0	93.9702	262.313	0	0	0	0	0	0	0	0	0	0	0	778.897	0	0	0	0	0	245.227	705.53	0	0	0	0	0	0	0	0	0	0	0
HMF002311	HMF002311A	390.417	162.757	1017.98	0	0	0	0	3663.53	0	0	0	0	217.675	0	0	0	226.662	515.231	0	0	0	0	0	0	0	0	0	0	0	1178.24	0	0	0	0	0	852.728	447.332	0	1044.44	0	0	0	0	0	0	0	0	0
HMF002554	HMF002554A	689.303	176.345	0	0	0	0	0	187.398	0	0	0	0	0	0	0	0	49.7383	329.077	0	0	0	0	0	0	0	0	0	0	0	618.966	0	0	0	0	0	169.814	145.698	0	287.879	0	0	0	0	0	0	0	0	0
HMF001190	HMF001190A	1349.42	1074.05	315.779	0	0	0	0	966.293	0	0	0	0	286.845	0	0	0	0	905.931	0	0	0	0	0	0	0	0	0	0	0	1000.71	0	0	0	0	0	593.644	181.585	0	488.884	0	0	0	0	0	0	0	0	0
HMF002405	HMF002405A	514.995	1394.63	0	0	0	0	0	357.15	0	0	0	0	744.769	0	0	0	0	228.276	0	0	0	0	0	0	0	0	0	0	0	530.979	0	0	0	0	0	202.301	314.691	0	742.771	0	0	0	0	0	0	0	0	0
HMF001341	HMF001341A	888.531	518.81	182.609	0	0	0	0	0	0	0	0	0	87.5523	0	0	0	75.0449	259.655	0	0	0	0	0	0	0	0	0	0	0	556.833	0	0	0	0	0	0	214.628	0	365.719	0	0	0	0	0	0	0	0	0
HMF001125	HMF001125A	875.23	1604.75	239.516	0	0	0	0	191.114	0	0	0	0	1296.88	0	0	0	0	627.232	0	0	0	0	0	0	0	0	0	0	0	311.37	0	0	0	0	0	472.045	530.427	0	928.622	0	0	0	0	0	0	0	0	0
HMF002862	HMF002862A	648.087	698.288	123.995	0	0	0	0	160.139	0	0	0	0	166.163	0	0	0	57.7305	382.025	0	0	0	0	0	0	0	0	0	0	0	614.453	0	0	0	0	0	160.139	207.328	0	413.651	0	0	0	0	0	0	0	0	0
HMF002747	HMF002747A	1278.85	120.985	154.481	0	0	0	0	328.96	0	0	0	0	0	0	0	0	61.9925	377.454	0	0	0	0	0	0	0	0	0	0	0	842.898	0	0	0	0	0	0	337.959	0	483.942	0	0	0	0	0	0	0	0	0
HMF001391	HMF001391A	1281.23	741.951	1291.77	0	0	0	0	1825.53	0	0	0	0	812.183	0	0	0	204.174	1711.15	0	0	0	0	0	0	0	0	0	0	0	907.497	0	0	0	0	0	1541.09	389.286	0	1253.14	0	0	0	0	0	0	0	0	0
HMF002995	HMF002995A	625.539	1224.53	546.408	0	0	0	0	958.592	0	0	0	0	723.702	0	0	0	0	1380.79	0	0	0	0	0	0	0	0	0	0	0	813.351	0	0	0	0	0	587.977	217.862	0	650.08	0	0	0	0	0	0	0	0	0
HMF001671	HMF001671A	993.095	467.722	565.478	0	0	0	0	805.605	0	0	0	0	0	0	0	0	4305.25	0	0	0	0	0	0	0	0	0	0	0	0	1770.63	0	0	0	0	0	278.728	698.826	0	934.442	0	0	0	0	0	0	0	0	0
HMF002414	HMF002414A	745.681	0	2335.2	0	0	0	0	2703.78	0	0	0	0	323.512	0	0	0	1117.77	255.404	0	0	0	0	0	0	0	0	0	0	0	1217.93	0	0	0	0	0	323.011	1097.74	0	772.723	0	0	0	0	0	0	0	0	0
HMF003450	HMF003450A	744.08	402.043	0	0	0	0	0	244.526	0	0	0	0	0	0	0	0	80.0086	1238.63	0	0	0	0	0	0	0	0	0	0	0	801.086	0	0	0	0	0	403.543	216.023	0	363.539	0	0	0	0	0	0	0	0	0
HMF000275	HMF000275A	1568.45	324.766	580.188	0	0	0	0	436.014	0	0	0	0	168.619	0	0	0	210.524	1061.6	0	0	0	0	0	0	0	0	0	0	0	338.734	0	0	0	0	0	507.852	190.07	0	584.179	0	0	0	0	0	0	0	0	0
HMF002494	HMF002494A	1423.86	24209	0	0	0	0	0	0	0	0	0	0	10524.2	0	0	0	0	628.216	0	0	0	0	0	0	0	0	0	0	0	0	0	0	0	0	0	0	0	0	0	0	0	0	0	0	0	0	0	0
HMF003382	HMF003382A	341.951	139.183	152.201	0	0	0	0	233.808	0	0	0	0	58.0765	0	0	0	71.0937	433.571	0	0	0	0	0	0	0	0	0	0	0	476.127	0	0	0	0	0	295.89	320.422	0	513.677	0	0	0	0	0	0	0	0	0
HMF003545	HMF003545A	486.144	0	94.5279	0	0	0	0	527.656	0	0	0	0	78.0231	0	0	0	76.5226	362.607	0	0	0	0	0	0	0	0	0	0	0	803.237	0	0	0	0	0	245.573	190.056	0	464.137	0	0	0	0	0	0	0	0	0
HMF004121	HMF004121A	939.832	241.987	301.228	0	0	0	0	324.322	0	0	0	0	84.3439	0	0	0	171.7	259.558	0	0	0	0	0	0	0	0	0	0	0	944.351	0	0	0	0	0	160.153	480.459	0	629.065	0	0	0	0	0	0	0	0	0
HMF004071	HMF004071A	504.132	166.548	2117.26	0	0	0	0	2747.55	0	0	0	0	408.891	0	0	0	669.683	729.022	0	0	0	0	0	0	0	0	0	0	0	1277.04	0	0	0	0	0	919.505	385.953	0	395.427	0	0	0	0	0	0	0	0	0
HMF003871	HMF003871A	765.17	107.799	0	0	0	0	0	369.236	0	0	0	0	0	0	0	0	0	365.206	0	0	0	0	0	0	0	0	0	0	0	561.662	0	0	0	0	0	0	223.657	0	370.747	0	0	0	0	0	0	0	0	0
HMF003861	HMF003861A	1220.37	864.761	166.55	0	0	0	0	0	0	0	0	0	198.56	0	0	0	0	512.155	0	0	0	0	0	0	0	0	0	0	0	424.128	0	0	0	0	0	353.607	124.538	0	910.275	0	0	0	0	0	0	0	0	0
HMF004280	HMF004280A	0	0	3712.49	0	0	0	0	23330.6	0	0	0	0	1448.83	0	0	0	0	16135.9	0	0	0	0	0	0	0	0	0	0	0	2038.85	0	0	0	0	0	5124.35	3168.93	0	0	0	0	0	0	0	0	0	0	0
HMF004098	HMF004098A	755.186	183.302	506.954	0	0	0	0	387.582	0	0	0	0	180.306	0	0	0	117.374	520.439	0	0	0	0	0	0	0	0	0	0	0	615.836	0	0	0	0	0	200.784	237.244	0	470.992	0	0	0	0	0	0	0	0	0
HMF002063	HMF002063A	749.447	4368.78	1236.09	0	0	0	0	433.18	0	0	0	0	10115	0	0	0	262.806	966.786	0	0	0	0	0	0	0	0	0	0	0	734.958	0	0	0	0	0	674.002	462.658	0	995.265	0	0	0	0	0	0	0	0	0
HMF001546	HMF001546A	480.715	544.309	648.965	0	0	0	0	287.928	0	0	0	0	165.746	0	0	0	132.197	1704.53	0	0	0	0	0	0	0	0	0	0	0	668.995	0	0	0	0	0	804.196	0	0	278.414	0	0	0	0	0	0	0	0	0
HMF002290	HMF002290A	762	1680.5	134.5	0	0	0	0	212.5	0	0	0	0	649.5	0	0	0	0	586	0	0	0	0	0	0	0	0	0	0	0	619	0	0	0	0	0	135.5	147	0	414.5	0	0	0	0	0	0	0	0	0
HMF000806	HMF000806A	595.578	480.58	277.702	0	0	0	0	199.865	0	0	0	0	352.526	0	0	0	65.7847	288.248	0	0	0	0	0	0	0	0	0	0	0	389.185	0	0	0	0	0	232.506	228.991	0	470.034	0	0	0	0	0	0	0	0	0
HMF002199	HMF002199A	526.479	223.841	0	0	0	0	0	122.962	0	0	0	0	0	0	0	0	0	165.121	0	0	0	0	0	0	0	0	0	0	0	962.618	0	0	0	0	0	184.694	269.011	0	419.577	0	0	0	0	0	0	0	0	0
HMF001323	HMF001323A	686.956	61.5857	0	0	0	0	0	221.308	0	0	0	0	0	0	0	0	0	204.284	0	0	0	0	0	0	0	0	0	0	0	472.157	0	0	0	0	0	0	196.273	0	177.747	0	0	0	0	0	0	0	0	0
HMF003241	HMF003241A	316.657	107.544	1392.6	0	0	0	0	1906.91	0	0	0	0	420.218	0	0	0	201.645	290.767	0	0	0	0	0	0	0	0	0	0	0	707.998	0	0	0	0	0	330.1	501.872	0	427.687	0	0	0	0	0	0	0	0	0
HMF000196	HMF000196A	502.79	5708.29	437.752	0	0	0	0	1041.1	0	0	0	0	8635.48	0	0	0	0	455.263	0	0	0	0	0	0	0	0	0	0	0	0	0	0	0	0	0	472.773	1236.21	0	420.743	0	0	0	0	0	0	0	0	0
HMF002932	HMF002932A	632.071	276.031	494.055	0	0	0	0	547.061	0	0	0	0	0	0	0	0	102.011	308.535	0	0	0	0	0	0	0	0	0	0	0	878.099	0	0	0	0	0	261.029	234.526	0	649.073	0	0	0	0	0	0	0	0	0
HMF000323	HMF000323C	869.738	3742.33	780.11	0	0	0	0	464.161	0	0	0	0	6082.16	0	0	0	0	1287.33	0	0	0	0	0	0	0	0	0	0	0	314.447	0	0	0	0	0	616.878	489.196	0	1003.43	0	0	0	0	0	0	0	0	0
HMF003507	HMF003507A	487.905	861.332	0	0	0	0	0	557.891	0	0	0	0	495.403	0	0	0	0	770.849	0	0	0	0	0	0	0	0	0	0	0	772.849	0	0	0	0	0	441.414	152.97	0	474.407	0	0	0	0	0	0	0	0	0
HMF000492	HMF000492A	779.868	5103.09	813.319	0	0	0	0	581.156	0	0	0	0	9707.41	0	0	0	0	326.027	0	0	0	0	0	0	0	0	0	0	0	0	0	0	0	0	0	445.354	515.252	0	943.131	0	0	0	0	0	0	0	0	0
HMF001466	HMF001466A	822.411	549.108	1379.53	0	0	0	0	1091.21	0	0	0	0	604.67	0	0	0	242.268	1071.69	0	0	0	0	0	0	0	0	0	0	0	978.584	0	0	0	0	0	483.536	803.89	0	1454.11	0	0	0	0	0	0	0	0	0
HMF003206	HMF003206A	595.328	217.31	196.084	0	0	0	0	0	0	0	0	0	75.3004	0	0	0	0	325.46	0	0	0	0	0	0	0	0	0	0	0	523.06	0	0	0	0	0	0	264.31	0	270.879	0	0	0	0	0	0	0	0	0
HMF002501	HMF002501A	1078.79	675.565	176.694	0	0	0	0	0	0	0	0	0	177.701	0	0	0	371.51	451.048	0	0	0	0	0	0	0	0	0	0	0	725.905	0	0	0	0	0	323.687	201.361	0	726.912	0	0	0	0	0	0	0	0	0
HMF003096	HMF003096A	534.904	815.091	787.122	0	0	0	0	1407.43	0	0	0	0	1145.72	0	0	0	3864.19	480.464	0	0	0	0	0	0	0	0	0	0	0	991.894	0	0	0	0	0	0	577.356	0	0	0	0	0	0	0	0	0	0	0
HMF000982	HMF000982A	1451.63	377.903	835.786	0	0	0	0	1184.7	0	0	0	0	380.403	0	0	0	402.897	473.879	0	0	0	0	0	0	0	0	0	0	0	1238.68	0	0	0	0	0	293.425	944.258	0	2171.44	0	0	0	0	0	0	0	0	0
HMF002135	HMF002135A	1559.89	3982.94	325.312	0	0	0	0	0	0	0	0	0	1926.81	0	0	0	0	830.071	0	0	0	0	0	0	0	0	0	0	0	981.449	0	0	0	0	0	386.966	696.738	0	1454.13	0	0	0	0	0	0	0	0	0
HMF002759	HMF002759A	1837.66	184.916	188.414	0	0	0	0	384.825	0	0	0	0	0	0	0	0	0	538.255	0	0	0	0	0	0	0	0	0	0	0	1023.03	0	0	0	0	0	331.349	157.928	0	726.169	0	0	0	0	0	0	0	0	0
HMF002578	HMF002578A	1067.14	855.619	399.99	0	0	0	0	412.521	0	0	0	0	270.169	0	0	0	90.2234	758.879	0	0	0	0	0	0	0	0	0	0	0	767.901	0	0	0	0	0	385.956	146.362	0	701.236	0	0	0	0	0	0	0	0	0
HMF002692	HMF002692A	593.452	767.937	715.442	0	0	0	0	2531.29	0	0	0	0	895.927	0	0	0	2230.32	967.421	0	0	0	0	0	0	0	0	0	0	0	919.925	0	0	0	0	0	890.927	431.465	0	1326.89	0	0	0	0	0	0	0	0	0
HMF000781	HMF000781A	408.594	258.876	300.436	0	0	0	0	208.803	0	0	0	0	83.1207	0	0	0	81.1178	349.508	0	0	0	0	0	0	0	0	0	0	0	634.422	0	0	0	0	0	184.268	441.141	0	491.714	0	0	0	0	0	0	0	0	0
HMF001384	HMF001384A	905.5	256.5	773	0	0	0	0	1068.5	0	0	0	0	173.5	0	0	0	356.5	618	0	0	0	0	0	0	0	0	0	0	0	819	0	0	0	0	0	556.5	473	0	385	0	0	0	0	0	0	0	0	0
HMF002093	HMF002093A	845.391	419.694	554.756	0	0	0	0	596.776	0	0	0	0	219.101	0	0	0	292.135	705.826	0	0	0	0	0	0	0	0	0	0	0	1467.68	0	0	0	0	0	507.735	388.68	0	1575.23	0	0	0	0	0	0	0	0	0
HMF003181	HMF003181A	508.293	239.373	691.579	0	0	0	0	399.623	0	0	0	0	167.762	0	0	0	542.346	613.958	0	0	0	0	0	0	0	0	0	0	0	1422.22	0	0	0	0	0	406.133	662.033	0	757.682	0	0	0	0	0	0	0	0	0
HMF000901	HMF000901A	941.723	1576.55	273.856	0	0	0	0	1206.57	0	0	0	0	751.476	0	0	0	0	1471.91	0	0	0	0	0	0	0	0	0	0	0	936.716	0	0	0	0	0	561.229	390.507	0	635.826	0	0	0	0	0	0	0	0	0
HMF003802	HMF003802A	0	25050.2	0	0	0	0	0	0	0	0	0	0	44754.8	0	0	0	0	1161.57	0	0	0	0	0	0	0	0	0	0	0	0	0	0	0	0	0	0	0	0	0	0	0	0	0	0	0	0	0	0
HMF001684	HMF001684A	634	189	1050	0	0	0	0	3102	0	0	0	0	458.5	0	0	0	171.5	243.5	0	0	0	0	0	0	0	0	0	0	0	1312	0	0	0	0	0	516	728	0	943.5	0	0	0	0	0	0	0	0	0
HMF001405	HMF001405A	1199.69	238.341	535.52	0	0	0	0	0	0	0	0	0	234.851	0	0	0	78.2837	273.744	0	0	0	0	0	0	0	0	0	0	0	691.09	0	0	0	0	0	0	302.664	0	632.253	0	0	0	0	0	0	0	0	0
HMF003666	HMF003666A	1286.05	254.313	853.372	0	0	0	0	849.874	0	0	0	0	256.311	0	0	0	287.289	1034.24	0	0	0	0	0	0	0	0	0	0	0	889.845	0	0	0	0	0	583.57	463.659	0	712.475	0	0	0	0	0	0	0	0	0
HMF001066	HMF001066A	532.4	0	607.598	0	0	0	0	764.511	0	0	0	0	0	0	0	0	0	386.517	0	0	0	0	0	0	0	0	0	0	0	624.643	0	0	0	0	0	310.818	165.936	0	417.097	0	0	0	0	0	0	0	0	0
HMF001191	HMF001191A	767.277	383.136	0	0	0	0	0	199.351	0	0	0	0	0	0	0	0	0	488.085	0	0	0	0	0	0	0	0	0	0	0	517.209	0	0	0	0	0	218.433	192.824	0	355.518	0	0	0	0	0	0	0	0	0
HMF003429	HMF003429A	1843.58	861.779	362.59	0	0	0	0	707.101	0	0	0	0	153.674	0	0	0	605.656	1235.42	0	0	0	0	0	0	0	0	0	0	0	1482.5	0	0	0	0	0	584.061	517.77	0	1223.87	0	0	0	0	0	0	0	0	0
HMF001708	HMF001708A	0	31728	0	0	0	0	0	0	0	0	0	0	27253.9	0	0	0	0	0	0	0	0	0	0	0	0	0	0	0	0	0	0	0	0	0	0	0	0	0	0	0	0	0	0	0	0	0	0	0
HMF001575	HMF001575A	237.857	480.221	1777.17	0	0	0	0	4516.78	0	0	0	0	845.269	0	0	0	1664.5	728.594	0	0	0	0	0	0	0	0	0	0	0	1504.76	0	0	0	0	0	1022.54	433.15	0	444.167	0	0	0	0	0	0	0	0	0
HMF004386	HMF004386A	445.993	2511.09	319.712	0	0	0	0	218.486	0	0	0	0	1957.36	0	0	0	0	723.611	0	0	0	0	0	0	0	0	0	0	0	419.935	0	0	0	0	0	206.961	136.303	0	212.473	0	0	0	0	0	0	0	0	0
HMF003921	HMF003921A	591.666	162.633	558.74	0	0	0	0	590.668	0	0	0	0	97.7795	0	0	0	112.746	394.111	0	0	0	0	0	0	0	0	0	0	0	762.78	0	0	0	0	0	222.997	149.662	0	0	0	0	0	0	0	0	0	0	0
HMF000807	HMF000807A	874.201	1943.67	236.825	0	0	0	0	246.839	0	0	0	0	665.414	0	0	0	95.6314	545.249	0	0	0	0	0	0	0	0	0	0	0	580.798	0	0	0	0	0	246.839	361.997	0	752.534	0	0	0	0	0	0	0	0	0
HMF000372	HMF000372B	0	34109.8	0	0	0	0	0	0	0	0	0	0	14905.9	0	0	0	0	1291.36	0	0	0	0	0	0	0	0	0	0	0	0	0	0	0	0	0	0	0	0	0	0	0	0	0	0	0	0	0	0
HMF001930	HMF001930A	319.173	440.359	995.918	0	0	0	0	2947.86	0	0	0	0	477.263	0	0	0	132.157	434.374	0	0	0	0	0	0	0	0	0	0	0	1109.12	0	0	0	0	0	606.927	305.708	0	718.138	0	0	0	0	0	0	0	0	0
HMF002386	HMF002386A	1053.54	373.901	1647.47	0	0	0	0	0	0	0	0	0	587.917	0	0	0	1315.17	378.913	0	0	0	0	0	0	0	0	0	0	0	753.315	0	0	0	0	0	518.249	797.421	0	1212.42	0	0	0	0	0	0	0	0	0
HMF001454	HMF001454A	490.083	306.678	307.68	0	0	0	0	119.263	0	0	0	0	246.044	0	0	0	0	214.474	0	0	0	0	0	0	0	0	0	0	0	616.863	0	0	0	0	0	147.325	247.046	0	214.474	0	0	0	0	0	0	0	0	0
HMF000758	HMF000758A	0	316.212	1989.34	0	0	0	0	6114.11	0	0	0	0	569.883	0	0	0	793.533	5900.47	0	0	0	0	0	0	0	0	0	0	0	2367.59	0	0	0	0	0	1985.83	2153.45	0	0	0	0	0	0	0	0	0	0	0
HMF002484	HMF002484A	759.035	367.533	1099.6	0	0	0	0	1677.87	0	0	0	0	384.012	0	0	0	158.299	781.506	0	0	0	0	0	0	0	0	0	0	0	774.016	0	0	0	0	0	639.187	536.318	0	686.627	0	0	0	0	0	0	0	0	0
HMF001615	HMF001615A	582.035	441.285	130.232	0	0	0	0	160.285	0	0	0	0	0	0	0	0	79.1408	321.572	0	0	0	0	0	0	0	0	0	0	0	564.003	0	0	0	0	0	109.194	274.989	0	414.237	0	0	0	0	0	0	0	0	0
HMF002725	HMF002725A	716.713	315.916	460.062	0	0	0	0	247.108	0	0	0	0	277.243	0	0	0	140.63	691.098	0	0	0	0	0	0	0	0	0	0	0	886.976	0	0	0	0	0	338.015	543.938	0	624.299	0	0	0	0	0	0	0	0	0
HMF002342	HMF002342A	934.601	482.503	0	0	0	0	0	208.852	0	0	0	0	369.354	0	0	0	68.7866	422.689	0	0	0	0	0	0	0	0	0	0	0	430.664	0	0	0	0	0	224.304	140.065	0	485.494	0	0	0	0	0	0	0	0	0
HMF003745	HMF003745A	1345.05	618.944	0	0	0	0	0	456.195	0	0	0	0	121.685	0	0	0	120.183	612.934	0	0	0	0	0	0	0	0	0	0	0	1002.03	0	0	0	0	0	424.147	293.948	0	1113.2	0	0	0	0	0	0	0	0	0
HMF001392	HMF001392A	0	0	1230.28	0	0	0	0	14616.5	0	0	0	0	1236.78	0	0	0	0	13282.2	0	0	0	0	0	0	0	0	0	0	0	0	0	0	0	0	0	3730.82	0	0	0	0	0	0	0	0	0	0	0	0
HMF001729	HMF001729A	706.713	344.104	151.546	0	0	0	0	196.059	0	0	0	0	0	0	0	0	87.5263	359.108	0	0	0	0	0	0	0	0	0	0	0	737.722	0	0	0	0	0	252.076	156.047	0	323.097	0	0	0	0	0	0	0	0	0
HMF002119	HMF002119A	919.36	153.897	261.022	0	0	0	0	0	0	0	0	0	0	0	0	0	52.305	223.805	0	0	0	0	0	0	0	0	0	0	0	367.141	0	0	0	0	0	0	110.645	0	280.636	0	0	0	0	0	0	0	0	0
HMF001966	HMF001966A	288.712	303.223	1171.36	0	0	0	0	2158.59	0	0	0	0	388.285	0	0	0	142.605	274.201	0	0	0	0	0	0	0	0	0	0	0	899.661	0	0	0	0	0	385.283	238.675	0	557.409	0	0	0	0	0	0	0	0	0
HMF002125	HMF002125A	977.524	503.755	274.866	0	0	0	0	443.784	0	0	0	0	99.4515	0	0	0	0	613.701	0	0	0	0	0	0	0	0	0	0	0	437.287	0	0	0	0	0	279.364	129.437	0	286.86	0	0	0	0	0	0	0	0	0
HMF004381	HMF004381A	1166.16	0	611.659	0	0	0	0	1368.21	0	0	0	0	167.956	0	0	0	1168.67	359.475	0	0	0	0	0	0	0	0	0	0	0	789.141	0	0	0	0	0	219.596	184.501	0	309.339	0	0	0	0	0	0	0	0	0
HMF004094	HMF004094A	248.209	73.4139	80.9052	0	0	0	0	91.8923	0	0	0	0	34.959	0	0	0	0	180.788	0	0	0	0	0	0	0	0	0	0	0	423.504	0	0	0	0	0	0	182.786	0	315.63	0	0	0	0	0	0	0	0	0
HMF001455	HMF001455A	274.289	728.769	2720.37	0	0	0	0	3597.29	0	0	0	0	2348.98	0	0	0	2369	702.241	0	0	0	0	0	0	0	0	0	0	0	949.502	0	0	0	0	0	727.768	1345.92	0	1299.87	0	0	0	0	0	0	0	0	0
HMF001160	HMF001160A	343.141	9988.61	501.206	0	0	0	0	0	0	0	0	0	8630.05	0	0	0	0	0	0	0	0	0	0	0	0	0	0	0	0	582.24	0	0	0	0	0	0	433.678	0	781.822	0	0	0	0	0	0	0	0	0
HMF000371	HMF000371A	349.21	152.246	0	0	0	0	0	414.53	0	0	0	0	137.674	0	0	0	103.507	190.935	0	0	0	0	0	0	0	0	0	0	0	1921.41	0	0	0	0	0	0	2586.16	0	0	0	0	0	0	0	0	0	0	0
HMF002680	HMF002680A	410.827	537.892	317.412	0	0	0	0	282.255	0	0	0	0	252.121	0	0	0	58.2591	210.938	0	0	0	0	0	0	0	0	0	0	0	612.725	0	0	0	0	0	199.387	207.422	0	620.761	0	0	0	0	0	0	0	0	0
HMF002625	HMF002625A	175.178	706.235	2577.98	0	0	0	0	2784.78	0	0	0	0	801.102	0	0	0	331.283	224.871	0	0	0	0	0	0	0	0	0	0	0	970.257	0	0	0	0	0	492.407	654.033	0	998.868	0	0	0	0	0	0	0	0	0
HMF003850	HMF003850A	1535.7	1359.33	662.879	0	0	0	0	716.992	0	0	0	0	1587.3	0	0	0	124.76	1994.15	0	0	0	0	0	0	0	0	0	0	0	570.688	0	0	0	0	0	742.545	217.453	0	339.206	0	0	0	0	0	0	0	0	0
HMF001293	HMF001293A	737.828	831.679	170.729	0	0	0	0	576.584	0	0	0	0	405.855	0	0	0	0	308.011	0	0	0	0	0	0	0	0	0	0	0	630.998	0	0	0	0	0	313.502	241.616	0	746.814	0	0	0	0	0	0	0	0	0
HMF000656	HMF000656A	713.785	1110.44	839.335	0	0	0	0	1041.92	0	0	0	0	713.284	0	0	0	326.13	965.885	0	0	0	0	0	0	0	0	0	0	0	555.722	0	0	0	0	0	573.228	533.213	0	1408.06	0	0	0	0	0	0	0	0	0
HMF002529	HMF002529A	320.977	246.598	77.374	0	0	0	0	117.309	0	0	0	0	62.3984	0	0	0	0	150.754	0	0	0	0	0	0	0	0	0	0	0	579.556	0	0	0	0	0	125.795	175.714	0	270.559	0	0	0	0	0	0	0	0	0
HMF002397	HMF002397A	746.182	885.623	259.889	0	0	0	0	814.653	0	0	0	0	0	0	0	0	133.443	615.738	0	0	0	0	0	0	0	0	0	0	0	1179.5	0	0	0	0	0	0	360.846	0	675.712	0	0	0	0	0	0	0	0	0
HMF001962	HMF001962A	343.891	1221.39	173.697	0	0	0	0	555.13	0	0	0	0	1246.42	0	0	0	0	744.846	0	0	0	0	0	0	0	0	0	0	0	1317	0	0	0	0	0	626.211	185.711	0	571.649	0	0	0	0	0	0	0	0	0
HMF000476	HMF000476A	655.849	2351.13	332.939	0	0	0	0	454.281	0	0	0	0	1721.35	0	0	0	206.582	965.722	0	0	0	0	0	0	0	0	0	0	0	430.714	0	0	0	0	0	540.022	197.055	0	658.356	0	0	0	0	0	0	0	0	0
HMF000145	HMF000145A	467.82	74.5289	172.726	0	0	0	0	282.001	0	0	0	0	61.9395	0	0	0	0	141.504	0	0	0	0	0	0	0	0	0	0	0	654.646	0	0	0	0	0	0	230.133	0	399.837	0	0	0	0	0	0	0	0	0
HMF001718	HMF001718A	1020.07	0	1773.98	0	0	0	0	1380.99	0	0	0	0	322.815	0	0	0	686.232	307.276	0	0	0	0	0	0	0	0	0	0	0	3043.68	0	0	0	0	0	0	622.571	0	549.387	0	0	0	0	0	0	0	0	0
HMF003703	HMF003703A	631.817	789.897	261.459	0	0	0	0	980.596	0	0	0	0	245.902	0	0	0	129.475	252.928	0	0	0	0	0	0	0	0	0	0	0	918.368	0	0	0	0	0	644.865	197.725	0	263.968	0	0	0	0	0	0	0	0	0
HMF000693	HMF000693B	0	596.813	543.195	0	0	0	0	2892.87	0	0	0	0	600.321	0	0	0	18287.2	0	0	0	0	0	0	0	0	0	0	0	0	0	0	0	0	0	0	0	1103.43	0	0	0	0	0	0	0	0	0	0	0
HMF000919	HMF000919A	635.824	439.378	685.81	0	0	0	0	363.399	0	0	0	0	321.911	0	0	0	138.962	825.271	0	0	0	0	0	0	0	0	0	0	0	458.373	0	0	0	0	0	556.346	321.411	0	669.315	0	0	0	0	0	0	0	0	0
HMF001094	HMF001094A	0	49911.8	0	0	0	0	0	0	0	0	0	0	0	0	0	0	0	0	0	0	0	0	0	0	0	0	0	0	0	1236.73	0	0	0	0	0	0	0	0	0	0	0	0	0	0	0	0	0	0
HMF001689	HMF001689A	353.528	425.236	115.837	0	0	0	0	99.2886	0	0	0	0	333.971	0	0	0	0	94.7755	0	0	0	0	0	0	0	0	0	0	0	339.988	0	0	0	0	0	65.1895	52.6531	0	164.478	0	0	0	0	0	0	0	0	0
HMF000579	HMF000579B	2764.31	37220.7	3731.92	0	0	0	0	1566.18	0	0	0	0	33618.8	0	0	0	5140.08	0	0	0	0	0	0	0	0	0	0	0	0	0	0	0	0	0	0	0	2155.24	0	1524.67	0	0	0	0	0	0	0	0	0
HMF001204	HMF001204A	777.196	1526.37	325.291	0	0	0	0	1044.43	0	0	0	0	1994.79	0	0	0	0	204.183	0	0	0	0	0	0	0	0	0	0	0	958.358	0	0	0	0	0	203.682	170.152	0	567.007	0	0	0	0	0	0	0	0	0
HMF000950	HMF000950A	929.922	831.507	322.359	0	0	0	0	346.461	0	0	0	0	469.982	0	0	0	0	682.378	0	0	0	0	0	0	0	0	0	0	0	627.145	0	0	0	0	0	295.747	203.86	0	683.382	0	0	0	0	0	0	0	0	0
HMF001780	HMF001780A	840.575	251.574	0	0	0	0	0	347.411	0	0	0	0	88.8494	0	0	0	71.8781	907.961	0	0	0	0	0	0	0	0	0	0	0	553.562	0	0	0	0	0	254.568	290.508	0	783.671	0	0	0	0	0	0	0	0	0
HMF002312	HMF002312A	778.827	9041.2	382.397	0	0	0	0	0	0	0	0	0	5747.48	0	0	0	0	351.825	0	0	0	0	0	0	0	0	0	0	0	351.825	0	0	0	0	0	0	288.677	0	417.479	0	0	0	0	0	0	0	0	0
HMF000397	HMF000397A	800.45	1296.42	632.461	0	0	0	0	1099.93	0	0	0	0	1268.42	0	0	0	0	1270.42	0	0	0	0	0	0	0	0	0	0	0	340.979	0	0	0	0	0	513.468	233.985	0	486.97	0	0	0	0	0	0	0	0	0
HMF000403	HMF000403A	1269.46	752.289	531.644	0	0	0	0	0	0	0	0	0	188.197	0	0	0	170.725	496.701	0	0	0	0	0	0	0	0	0	0	0	1044.32	0	0	0	0	0	458.762	516.169	0	921.018	0	0	0	0	0	0	0	0	0
HMF002965	HMF002965A	1095.04	409.641	554.015	0	0	0	0	0	0	0	0	0	161.858	0	0	0	158.861	333.708	0	0	0	0	0	0	0	0	0	0	0	473.585	0	0	0	0	0	256.775	300.237	0	726.863	0	0	0	0	0	0	0	0	0
HMF001905	HMF001905A	0	494.924	3926.4	0	0	0	0	6714.97	0	0	0	0	921.859	0	0	0	501.923	1449.28	0	0	0	0	0	0	0	0	0	0	0	1730.23	0	0	0	0	0	1350.79	1462.78	0	755.884	0	0	0	0	0	0	0	0	0
HMF001516	HMF001516A	220	150	156	0	0	0	0	0	0	0	0	0	0	0	0	0	93	97.5	0	0	0	0	0	0	0	0	0	0	0	570	0	0	0	0	0	0	158.5	0	332.5	0	0	0	0	0	0	0	0	0
HMF001019	HMF001019A	645.08	567.269	412.651	0	0	0	0	668.173	0	0	0	0	284.137	0	0	0	150.1	909.137	0	0	0	0	0	0	0	0	0	0	0	975.402	0	0	0	0	0	780.12	173.193	0	934.739	0	0	0	0	0	0	0	0	0
HMF001569	HMF001569A	511.528	314.324	0	0	0	0	0	283.793	0	0	0	0	112.116	0	0	0	0	282.291	0	0	0	0	0	0	0	0	0	0	0	531.549	0	0	0	0	0	243.251	157.162	0	342.353	0	0	0	0	0	0	0	0	0
HMF002596	HMF002596A	1572.72	971.592	2388.54	0	0	0	0	1314.1	0	0	0	0	1562.74	0	0	0	217.685	2754.01	0	0	0	0	0	0	0	0	0	0	0	399.92	0	0	0	0	0	1260.17	1084.43	0	1656.1	0	0	0	0	0	0	0	0	0
HMF000887	HMF000887A	561.381	174.618	929.63	0	0	0	0	1618.1	0	0	0	0	237.161	0	0	0	144.098	642.936	0	0	0	0	0	0	0	0	0	0	0	710.482	0	0	0	0	0	521.854	453.808	0	641.935	0	0	0	0	0	0	0	0	0
HMF002600	HMF002600A	344.957	0	5076.37	0	0	0	0	2238.22	0	0	0	0	891.39	0	0	0	279.965	239.97	0	0	0	0	0	0	0	0	0	0	0	827.898	0	0	0	0	0	507.437	1341.33	0	0	0	0	0	0	0	0	0	0	0
HMF003599	HMF003599A	1119.68	173.682	254.267	0	0	0	0	260.273	0	0	0	0	137.144	0	0	0	79.083	372.892	0	0	0	0	0	0	0	0	0	0	0	362.881	0	0	0	0	0	241.253	198.709	0	609.14	0	0	0	0	0	0	0	0	0
HMF001280	HMF001280A	531.933	309.961	1114.36	0	0	0	0	2648.16	0	0	0	0	475.44	0	0	0	379.452	0	0	0	0	0	0	0	0	0	0	0	0	958.879	0	0	0	0	0	381.952	521.934	0	411.448	0	0	0	0	0	0	0	0	0
HMF000395	HMF000395A	558.008	293.794	471.273	0	0	0	0	259.2	0	0	0	0	119.322	0	0	0	0	578.563	0	0	0	0	0	0	0	0	0	0	0	829.742	0	0	0	0	0	300.311	189.011	0	782.615	0	0	0	0	0	0	0	0	0
HMF000937	HMF000937A	563.67	1088.83	2227.67	0	0	0	0	4792.94	0	0	0	0	1023.31	0	0	0	1471.94	1173.35	0	0	0	0	0	0	0	0	0	0	0	1392.92	0	0	0	0	0	1186.86	699.71	0	1001.8	0	0	0	0	0	0	0	0	0
HMF000545	HMF000545A	869.49	1304.74	387.664	0	0	0	0	280.981	0	0	0	0	330.566	0	0	0	0	323.554	0	0	0	0	0	0	0	0	0	0	0	917.071	0	0	0	0	0	0	461.29	0	478.82	0	0	0	0	0	0	0	0	0
HMF001351	HMF001351A	0	78656.7	0	0	0	0	0	0	0	0	0	0	58720.7	0	0	0	0	0	0	0	0	0	0	0	0	0	0	0	0	0	0	0	0	0	0	0	0	0	0	0	0	0	0	0	0	0	0	0
HMF001982	HMF001982A	301.878	1492.9	397.34	0	0	0	0	636.243	0	0	0	0	1514.39	0	0	0	0	409.335	0	0	0	0	0	0	0	0	0	0	0	531.785	0	0	0	0	0	268.392	228.908	0	348.859	0	0	0	0	0	0	0	0	0
HMF000733	HMF000733A	394.927	79.2865	203.234	0	0	0	0	280.514	0	0	0	0	88.3191	0	0	0	0	227.823	0	0	0	0	0	0	0	0	0	0	0	448.119	0	0	0	0	0	96.3481	118.428	0	238.863	0	0	0	0	0	0	0	0	0
HMF003003	HMF003003A	359.873	851.517	180.685	0	0	0	0	350.889	0	0	0	0	247.569	0	0	0	935.87	402.299	0	0	0	0	0	0	0	0	0	0	0	502.125	0	0	0	0	0	0	246.071	0	0	0	0	0	0	0	0	0	0	0
HMF001711	HMF001711A	184.973	206.97	1325.31	0	0	0	0	1597.77	0	0	0	0	460.433	0	0	0	183.473	542.421	0	0	0	0	0	0	0	0	0	0	0	779.386	0	0	0	0	0	441.935	431.937	0	680.4	0	0	0	0	0	0	0	0	0
HMF002147	HMF002147A	436.357	48.7634	0	0	0	0	0	161.372	0	0	0	0	0	0	0	0	0	209.632	0	0	0	0	0	0	0	0	0	0	0	352.906	0	0	0	0	0	0	161.372	0	211.14	0	0	0	0	0	0	0	0	0
HMF002562	HMF002562A	499.757	0	371.807	0	0	0	0	566.993	0	0	0	0	93.3281	0	0	0	600.109	1752.16	0	0	0	0	0	0	0	0	0	0	0	0	0	0	0	0	0	1130.47	692.434	0	596.597	0	0	0	0	0	0	0	0	0
HMF003370	HMF003370A	349.035	322.532	3621.36	0	0	0	0	4016.9	0	0	0	0	638.564	0	0	0	514.051	894.589	0	0	0	0	0	0	0	0	0	0	0	1358.64	0	0	0	0	0	1152.62	867.587	0	1268.13	0	0	0	0	0	0	0	0	0
HMF000735	HMF000735A	1193.86	645.939	421.243	0	0	0	0	0	0	0	0	0	0	0	0	0	254.857	621.811	0	0	0	0	0	0	0	0	0	0	0	1028.48	0	0	0	0	0	729.384	0	0	2459.6	0	0	0	0	0	0	0	0	0
HMF003581	HMF003581A	1038.69	474.815	3490.32	0	0	0	0	5621.73	0	0	0	0	841.058	0	0	0	548.364	0	0	0	0	0	0	0	0	0	0	0	0	1386.42	0	0	0	0	0	860.071	2554.69	0	2616.24	0	0	0	0	0	0	0	0	0
HMF000133	HMF000133A	836.725	258.678	1213.8	0	0	0	0	749.67	0	0	0	0	484.524	0	0	0	697.436	593.965	0	0	0	0	0	0	0	0	0	0	0	527.306	0	0	0	0	0	659.132	503.925	0	1694.84	0	0	0	0	0	0	0	0	0
HMF001263	HMF001263A	814.255	1106.17	3270.02	0	0	0	0	1751.97	0	0	0	0	1328.1	0	0	0	1814.95	1256.12	0	0	0	0	0	0	0	0	0	0	0	868.739	0	0	0	0	0	1175.65	1467.56	0	1769.47	0	0	0	0	0	0	0	0	0
HMF001970	HMF001970A	604.262	352.486	0	0	0	0	0	0	0	0	0	0	0	0	0	0	79.2721	186.464	0	0	0	0	0	0	0	0	0	0	0	576.343	0	0	0	0	0	267.232	209.896	0	534.962	0	0	0	0	0	0	0	0	0
HMF000502	HMF000502A	1051.36	400.28	956.56	0	0	0	0	930.476	0	0	0	0	302.467	0	0	0	155.497	817.615	0	0	0	0	0	0	0	0	0	0	0	404.293	0	0	0	0	0	426.364	455.958	0	977.125	0	0	0	0	0	0	0	0	0
HMF004010	HMF004010A	517.657	9183.15	0	0	0	0	0	0	0	0	0	0	6144.29	0	0	0	0	1026.8	0	0	0	0	0	0	0	0	0	0	0	394.5	0	0	0	0	0	0	321.908	0	522.663	0	0	0	0	0	0	0	0	0
HMF004030	HMF004030A	608.365	254.896	203.618	0	0	0	0	305.676	0	0	0	0	0	0	0	0	0	784.104	0	0	0	0	0	0	0	0	0	0	0	618.82	0	0	0	0	0	374.877	312.148	0	251.909	0	0	0	0	0	0	0	0	0
HMF001982	HMF001982B	0	9484.44	885.635	0	0	0	0	1054.16	0	0	0	0	11973.8	0	0	0	0	1076.66	0	0	0	0	0	0	0	0	0	0	0	0	0	0	0	0	0	471.572	0	0	0	0	0	0	0	0	0	0	0	0
HMF003849	HMF003849A	1071.93	739.954	1948.38	0	0	0	0	6486.1	0	0	0	0	1237.42	0	0	0	291.982	326.48	0	0	0	0	0	0	0	0	0	0	0	1514.41	0	0	0	0	0	958.441	663.959	0	897.944	0	0	0	0	0	0	0	0	0
HMF004335	HMF004335A	471.769	848.983	1271.72	0	0	0	0	1309.75	0	0	0	0	781.945	0	0	0	0	0	0	0	0	0	0	0	0	0	0	0	0	1359.77	0	0	0	0	0	0	1317.75	0	0	0	0	0	0	0	0	0	0	0
HMF004276	HMF004276A	697.553	351.8	281.239	0	0	0	0	275.695	0	0	0	0	281.743	0	0	0	58.4654	488.892	0	0	0	0	0	0	0	0	0	0	0	413.794	0	0	0	0	0	233.358	207.653	0	352.809	0	0	0	0	0	0	0	0	0
HMF004163	HMF004163A	614.287	68.9761	261.41	0	0	0	0	0	0	0	0	0	0	0	0	0	78.9727	101.465	0	0	0	0	0	0	0	0	0	0	0	994.156	0	0	0	0	0	0	190.434	0	343.381	0	0	0	0	0	0	0	0	0
HMF002081	HMF002081A	1311.87	279.259	627.458	0	0	0	0	912.213	0	0	0	0	351.197	0	0	0	141.878	620.964	0	0	0	0	0	0	0	0	0	0	0	725.874	0	0	0	0	0	485.581	490.077	0	1005.63	0	0	0	0	0	0	0	0	0
HMF000251	HMF000251A	500.854	3698.62	453.821	0	0	0	0	417.295	0	0	0	0	3881.24	0	0	0	0	1165.32	0	0	0	0	0	0	0	0	0	0	0	399.282	0	0	0	0	0	314.723	438.31	0	692.49	0	0	0	0	0	0	0	0	0
HMF003531	HMF003531A	320.791	2551.36	0	0	0	0	0	0	0	0	0	0	1186.88	0	0	0	0	215.524	0	0	0	0	0	0	0	0	0	0	0	406.102	0	0	0	0	0	0	327.276	0	320.791	0	0	0	0	0	0	0	0	0
HMF002559	HMF002559A	451.707	1103.56	0	0	0	0	0	1799.84	0	0	0	0	568.003	0	0	0	393.809	437.732	0	0	0	0	0	0	0	0	0	0	0	2256.04	0	0	0	0	0	362.863	498.625	0	867.477	0	0	0	0	0	0	0	0	0
HMF002391	HMF002391A	209.147	998.317	810.633	0	0	0	0	1454.05	0	0	0	0	1666.19	0	0	0	128.284	157.235	0	0	0	0	0	0	0	0	0	0	0	624.946	0	0	0	0	0	415.3	421.789	0	529.108	0	0	0	0	0	0	0	0	0
HMF000228	HMF000228A	650.039	251.435	842.107	0	0	0	0	408.582	0	0	0	0	253.43	0	0	0	195.062	595.661	0	0	0	0	0	0	0	0	0	0	0	1035.17	0	0	0	0	0	250.437	596.659	0	705.415	0	0	0	0	0	0	0	0	0
HMF000408	HMF000408A	729.835	18719.8	0	0	0	0	0	0	0	0	0	0	8934.98	0	0	0	0	725.836	0	0	0	0	0	0	0	0	0	0	0	0	0	0	0	0	0	0	0	0	495.388	0	0	0	0	0	0	0	0	0
HMF001607	HMF001607A	659.064	1064.3	388.743	0	0	0	0	664.561	0	0	0	0	347.27	0	0	0	101.933	519.157	0	0	0	0	0	0	0	0	0	0	0	1170.73	0	0	0	0	0	243.339	605.6	0	1042.31	0	0	0	0	0	0	0	0	0
HMF001219	HMF001219A	863.578	418.233	315.307	0	0	0	0	217.401	0	0	0	0	288.696	0	0	0	0	337.9	0	0	0	0	0	0	0	0	0	0	0	348.444	0	0	0	0	0	202.338	239.994	0	336.394	0	0	0	0	0	0	0	0	0
HMF001721	HMF001721A	410.376	194.678	274.251	0	0	0	0	923.846	0	0	0	0	260.739	0	0	0	0	396.363	0	0	0	0	0	0	0	0	0	0	0	0	0	0	0	0	0	497.455	154.141	0	1626.99	0	0	0	0	0	0	0	0	0
HMF001157	HMF001157A	991.759	2790.86	571.301	0	0	0	0	1041.37	0	0	0	0	1951.45	0	0	0	0	1018.82	0	0	0	0	0	0	0	0	0	0	0	561.279	0	0	0	0	0	263.099	0	0	636.45	0	0	0	0	0	0	0	0	0
HMF000381	HMF000381A	763.448	416.244	248.145	0	0	0	0	535.814	0	0	0	0	200.618	0	0	0	459.269	767.95	0	0	0	0	0	0	0	0	0	0	0	1247.73	0	0	0	0	0	430.252	183.107	0	717.421	0	0	0	0	0	0	0	0	0
HMF001860	HMF001860A	579.907	679.822	280.665	0	0	0	0	273.134	0	0	0	0	94.3918	0	0	0	0	543.757	0	0	0	0	0	0	0	0	0	0	0	586.936	0	0	0	0	0	308.28	138.575	0	434.303	0	0	0	0	0	0	0	0	0
HMF002201	HMF002201A	678.2	1232.55	133.842	0	0	0	0	0	0	0	0	0	138.337	0	0	0	0	178.29	0	0	0	0	0	0	0	0	0	0	0	407.519	0	0	0	0	0	117.362	151.321	0	228.231	0	0	0	0	0	0	0	0	0
HMF001430	HMF001430A	830.373	1102.32	2030.36	0	0	0	0	2465.58	0	0	0	0	2183.11	0	0	0	417.691	391.147	0	0	0	0	0	0	0	0	0	0	0	1808.99	0	0	0	0	0	0	1092.31	0	1179.95	0	0	0	0	0	0	0	0	0
HMF002589	HMF002589A	1186.21	3712.1	2639.36	0	0	0	0	0	0	0	0	0	6418.94	0	0	0	370.91	842.296	0	0	0	0	0	0	0	0	0	0	0	561.364	0	0	0	0	0	707.828	646.343	0	1214.71	0	0	0	0	0	0	0	0	0
HMF003264	HMF003264A	828.703	122.734	140.695	0	0	0	0	326.792	0	0	0	0	107.766	0	0	0	58.3734	503.908	0	0	0	0	0	0	0	0	0	0	0	776.317	0	0	0	0	0	282.887	176.617	0	365.208	0	0	0	0	0	0	0	0	0
HMF003417	HMF003417A	495.427	235.416	400.056	0	0	0	0	473.843	0	0	0	0	0	0	0	0	1599.22	273.564	0	0	0	0	0	0	0	0	0	0	0	1137.42	0	0	0	0	0	0	770.999	0	193.754	0	0	0	0	0	0	0	0	0
HMF002003	HMF002003A	606.263	5023.68	979.425	0	0	0	0	0	0	0	0	0	8733.79	0	0	0	0	1417.62	0	0	0	0	0	0	0	0	0	0	0	0	0	0	0	0	0	863.375	427.186	0	1100.98	0	0	0	0	0	0	0	0	0
HMF002329	HMF002329A	471.346	11032.9	705.269	0	0	0	0	817.732	0	0	0	0	10869.9	0	0	0	1140.13	1680.45	0	0	0	0	0	0	0	0	0	0	0	545.821	0	0	0	0	0	668.281	0	0	729.261	0	0	0	0	0	0	0	0	0
HMF001145	HMF001145A	416.463	0	3292.97	0	0	0	0	0	0	0	0	0	1957.58	0	0	0	3343.77	859.08	0	0	0	0	0	0	0	0	0	0	0	0	0	0	0	0	0	748.426	557.799	0	1747.33	0	0	0	0	0	0	0	0	0
HMF003227	HMF003227A	895.117	1659.2	509.559	0	0	0	0	0	0	0	0	0	567.795	0	0	0	218.383	349.914	0	0	0	0	0	0	0	0	0	0	0	762.08	0	0	0	0	0	188.763	254.027	0	477.429	0	0	0	0	0	0	0	0	0
HMF003562	HMF003562A	708.667	1150.65	243.214	0	0	0	0	371.064	0	0	0	0	376.557	0	0	0	0	1067.74	0	0	0	0	0	0	0	0	0	0	0	755.112	0	0	0	0	0	270.182	313.132	0	196.769	0	0	0	0	0	0	0	0	0
HMF000239	HMF000239A	1831.86	13308.4	527.891	0	0	0	0	904.67	0	0	0	0	5339.95	0	0	0	0	736.045	0	0	0	0	0	0	0	0	0	0	0	1105.82	0	0	0	0	0	800.593	533.395	0	1119.83	0	0	0	0	0	0	0	0	0
HMF000184	HMF000184A	1441.4	228.747	202.775	0	0	0	0	336.627	0	0	0	0	0	0	0	0	0	317.149	0	0	0	0	0	0	0	0	0	0	0	614.819	0	0	0	0	0	0	274.696	0	559.88	0	0	0	0	0	0	0	0	0
HMF003049	HMF003049A	577.147	137.297	179.235	0	0	0	0	117.327	0	0	0	0	0	0	0	0	0	644.048	0	0	0	0	0	0	0	0	0	0	0	567.162	0	0	0	0	0	358.47	200.703	0	221.672	0	0	0	0	0	0	0	0	0
HMF003473	HMF003473A	658.257	1212.05	3279.29	0	0	0	0	3338.77	0	0	0	0	1559.42	0	0	0	416.346	757.221	0	0	0	0	0	0	0	0	0	0	0	2685.01	0	0	0	0	0	617.772	1127.58	0	604.277	0	0	0	0	0	0	0	0	0
HMF002122	HMF002122A	0	0	4753.61	0	0	0	0	7075.16	0	0	0	0	633.514	0	0	0	4211.6	0	0	0	0	0	0	0	0	0	0	0	0	1353.53	0	0	0	0	0	913.021	1946.54	0	547.513	0	0	0	0	0	0	0	0	0
HMF000255	HMF000255A	665.16	219.218	220.219	0	0	0	0	0	0	0	0	0	111.11	0	0	0	60.5601	889.883	0	0	0	0	0	0	0	0	0	0	0	181.68	0	0	0	0	0	346.344	218.217	0	505.001	0	0	0	0	0	0	0	0	0
HMF000731	HMF000731A	293.64	250.119	3210.53	0	0	0	0	4844.31	0	0	0	0	760.362	0	0	0	271.129	507.742	0	0	0	0	0	0	0	0	0	0	0	1472.7	0	0	0	0	0	821.391	1045.5	0	0	0	0	0	0	0	0	0	0	0
HMF000354	HMF000354A	715.036	184.123	216.557	0	0	0	0	297.391	0	0	0	0	65.3662	0	0	0	184.123	397.187	0	0	0	0	0	0	0	0	0	0	0	508.958	0	0	0	0	0	147.698	242.005	0	705.556	0	0	0	0	0	0	0	0	0
HMF003303	HMF003303A	990.734	702.94	481.829	0	0	0	0	626.729	0	0	0	0	576.591	0	0	0	274.758	508.904	0	0	0	0	0	0	0	0	0	0	0	1192.79	0	0	0	0	0	652.801	570.073	0	1032.85	0	0	0	0	0	0	0	0	0
HMF003800	HMF003800A	1095.22	4828.57	664.528	0	0	0	0	1087.73	0	0	0	0	3302.66	0	0	0	0	803.929	0	0	0	0	0	0	0	0	0	0	0	573.093	0	0	0	0	0	609.567	0	0	307.282	0	0	0	0	0	0	0	0	0
HMF002721	HMF002721A	379.63	90.5309	771.764	0	0	0	0	519.678	0	0	0	0	277.095	0	0	0	157.054	420.144	0	0	0	0	0	0	0	0	0	0	0	606.207	0	0	0	0	0	330.613	252.086	0	586.2	0	0	0	0	0	0	0	0	0
HMF002368	HMF002368A	474.912	18314.6	0	0	0	0	0	0	0	0	0	0	17368.8	0	0	0	0	0	0	0	0	0	0	0	0	0	0	0	0	0	0	0	0	0	0	0	0	0	0	0	0	0	0	0	0	0	0	0
HMF004062	HMF004062A	1320.31	89.2506	171.521	0	0	0	0	226.866	0	0	0	0	0	0	0	0	62.3258	302.654	0	0	0	0	0	0	0	0	0	0	0	611.292	0	0	0	0	0	0	194.457	0	449.743	0	0	0	0	0	0	0	0	0
HMF003720	HMF003720A	491.069	1626.54	289.129	0	0	0	0	0	0	0	0	0	1471.2	0	0	0	0	855.862	0	0	0	0	0	0	0	0	0	0	0	622.855	0	0	0	0	0	466.515	127.277	0	574.249	0	0	0	0	0	0	0	0	0
HMF003460	HMF003460A	701.057	363.991	181.497	0	0	0	0	136.123	0	0	0	0	203.436	0	0	0	99.7236	655.184	0	0	0	0	0	0	0	0	0	0	0	652.192	0	0	0	0	0	163.547	236.345	0	394.905	0	0	0	0	0	0	0	0	0
HMF000583	HMF000583A	922.529	1265.28	542.192	0	0	0	0	0	0	0	0	0	622.87	0	0	0	129.284	405.391	0	0	0	0	0	0	0	0	0	0	0	1094.41	0	0	0	0	0	249.549	570.254	0	1212.67	0	0	0	0	0	0	0	0	0
HMF002831	HMF002831A	636.388	426.255	418.269	0	0	0	0	325.93	0	0	0	0	364.363	0	0	0	112.803	690.793	0	0	0	0	0	0	0	0	0	0	0	529.075	0	0	0	0	0	528.077	205.641	0	339.407	0	0	0	0	0	0	0	0	0
HMF001535	HMF001535A	595.636	3835.38	298.068	0	0	0	0	433.099	0	0	0	0	2322.53	0	0	0	0	721.165	0	0	0	0	0	0	0	0	0	0	0	1111.25	0	0	0	0	0	365.083	382.087	0	771.676	0	0	0	0	0	0	0	0	0
HMF002364	HMF002364A	1193.05	344.793	713.038	0	0	0	0	285.914	0	0	0	0	563.844	0	0	0	160.671	656.654	0	0	0	0	0	0	0	0	0	0	0	834.289	0	0	0	0	0	247.493	703.058	0	393.194	0	0	0	0	0	0	0	0	0
HMF001698	HMF001698A	547.397	28077.2	935.824	0	0	0	0	1001.81	0	0	0	0	9611.7	0	0	0	0	966.819	0	0	0	0	0	0	0	0	0	0	0	0	0	0	0	0	0	0	0	0	0	0	0	0	0	0	0	0	0	0
HMF002878	HMF002878A	530.252	360.512	622.383	0	0	0	0	524.244	0	0	0	0	0	0	0	0	175.249	1416.01	0	0	0	0	0	0	0	0	0	0	0	989.404	0	0	0	0	0	769.091	317.45	0	584.83	0	0	0	0	0	0	0	0	0
HMF000984	HMF000984B	0	14928.3	0	0	0	0	0	0	0	0	0	0	19190.3	0	0	0	0	1677.88	0	0	0	0	0	0	0	0	0	0	0	0	0	0	0	0	0	0	0	0	0	0	0	0	0	0	0	0	0	0
HMF001172	HMF001172A	957.553	8256.7	1380.46	0	0	0	0	1502.72	0	0	0	0	6351.62	0	0	0	485.04	1151.47	0	0	0	0	0	0	0	0	0	0	0	534.646	0	0	0	0	0	468.505	544.668	0	753.616	0	0	0	0	0	0	0	0	0
HMF003034	HMF003034A	632.027	194.47	145.852	0	0	0	0	161.39	0	0	0	0	93.2252	0	0	0	0	296.215	0	0	0	0	0	0	0	0	0	0	0	758.332	0	0	0	0	0	340.823	99.7409	0	536.797	0	0	0	0	0	0	0	0	0
HMF001690	HMF001690A	422.463	443.961	793.431	0	0	0	0	493.457	0	0	0	0	371.468	0	0	0	146.987	1081.91	0	0	0	0	0	0	0	0	0	0	0	605.947	0	0	0	0	0	338.971	246.979	0	808.43	0	0	0	0	0	0	0	0	0
HMF002569	HMF002569A	1070.99	1046.48	733.334	0	0	0	0	681.31	0	0	0	0	468.713	0	0	0	229.605	506.23	0	0	0	0	0	0	0	0	0	0	0	1396.64	0	0	0	0	0	300.137	523.738	0	731.833	0	0	0	0	0	0	0	0	0
HMF001041	HMF001041A	1070.45	2375.77	4095.88	0	0	0	0	3047.42	0	0	0	0	1422.26	0	0	0	1031.47	5224.3	0	0	0	0	0	0	0	0	0	0	0	2401.76	0	0	0	0	0	1078.44	483.25	0	0	0	0	0	0	0	0	0	0	0
HMF001148	HMF001148A	1887.37	7369.86	1106.3	0	0	0	0	938.682	0	0	0	0	10361	0	0	0	0	799.081	0	0	0	0	0	0	0	0	0	0	0	0	0	0	0	0	0	0	464.338	0	504.867	0	0	0	0	0	0	0	0	0
HMF004078	HMF004078A	998.236	1356.25	244.822	0	0	0	0	250.806	0	0	0	0	487.65	0	0	0	92.7432	1020.67	0	0	0	0	0	0	0	0	0	0	0	421.832	0	0	0	0	0	258.784	118.173	0	0	0	0	0	0	0	0	0	0	0
HMF003720	HMF003720B	552.938	7294.69	657.927	0	0	0	0	0	0	0	0	0	10180.9	0	0	0	0	1412.34	0	0	0	0	0	0	0	0	0	0	0	445.45	0	0	0	0	0	513.443	0	0	1000.89	0	0	0	0	0	0	0	0	0
HMF001461	HMF001461B	865.55	23397.4	989.629	0	0	0	0	985.126	0	0	0	0	19391.3	0	0	0	0	1333.35	0	0	0	0	0	0	0	0	0	0	0	0	0	0	0	0	0	0	0	0	0	0	0	0	0	0	0	0	0	0
HMF000014	HMF000014A	1264.18	223.091	922.308	0	0	0	0	958.741	0	0	0	0	166.195	0	0	0	602.894	1347.53	0	0	0	0	0	0	0	0	0	0	0	567.958	0	0	0	0	0	826.983	443.187	0	851.937	0	0	0	0	0	0	0	0	0
HMF002327	HMF002327A	329.379	222.58	2472.84	0	0	0	0	4033.89	0	0	0	0	523.512	0	0	0	338.861	971.168	0	0	0	0	0	0	0	0	0	0	0	1113.4	0	0	0	0	0	1060	693.691	0	698.682	0	0	0	0	0	0	0	0	0
HMF000366	HMF000366A	471.926	4050.16	559.005	0	0	0	0	0	0	0	0	0	6503.37	0	0	0	0	249.225	0	0	0	0	0	0	0	0	0	0	0	975.881	0	0	0	0	0	0	238.215	0	441.399	0	0	0	0	0	0	0	0	0
HMF001225	HMF001225A	727.343	106.416	164.142	0	0	0	0	866.387	0	0	0	0	184.22	0	0	0	164.644	464.315	0	0	0	0	0	0	0	0	0	0	0	432.691	0	0	0	0	0	170.667	273.067	0	795.108	0	0	0	0	0	0	0	0	0
HMF003025	HMF003025A	665.292	9279.58	892.892	0	0	0	0	0	0	0	0	0	8565.76	0	0	0	447.196	1810.8	0	0	0	0	0	0	0	0	0	0	0	0	0	0	0	0	0	478.71	331.646	0	965.924	0	0	0	0	0	0	0	0	0
HMF000851	HMF000851A	539.338	684.429	773.986	0	0	0	0	516.324	0	0	0	0	1533.46	0	0	0	164.603	346.718	0	0	0	0	0	0	0	0	0	0	0	526.831	0	0	0	0	0	171.608	452.284	0	666.418	0	0	0	0	0	0	0	0	0
HMF002599	HMF002599A	0	1435.25	3018.29	0	0	0	0	10004.7	0	0	0	0	1896.64	0	0	0	1099.61	0	0	0	0	0	0	0	0	0	0	0	0	1174.25	0	0	0	0	0	1715.79	681.807	0	1323.04	0	0	0	0	0	0	0	0	0
HMF000651	HMF000651A	871.082	1613.73	1486.79	0	0	0	0	1387.33	0	0	0	0	1555.75	0	0	0	271.37	1112.97	0	0	0	0	0	0	0	0	0	0	0	829.602	0	0	0	0	0	823.605	350.832	0	1150.95	0	0	0	0	0	0	0	0	0
HMF002540	HMF002540A	583.377	0	660.427	0	0	0	0	727.47	0	0	0	0	306.198	0	0	0	1475.95	224.145	0	0	0	0	0	0	0	0	0	0	0	602.389	0	0	0	0	0	0	355.73	0	291.688	0	0	0	0	0	0	0	0	0
HMF002280	HMF002280A	778.803	604.287	388.649	0	0	0	0	371.097	0	0	0	0	325.463	0	0	0	0	1201.05	0	0	0	0	0	0	0	0	0	0	0	442.81	0	0	0	0	0	377.617	188.558	0	332.483	0	0	0	0	0	0	0	0	0
HMF000086	HMF000086A	0	197.635	3570.91	0	0	0	0	5965.49	0	0	0	0	349.854	0	0	0	437.193	0	0	0	0	0	0	0	0	0	0	0	0	1118.44	0	0	0	0	0	860.911	1503.72	0	0	0	0	0	0	0	0	0	0	0
HMF001076	HMF001076A	828.824	360.141	1077.92	0	0	0	0	693.771	0	0	0	0	415.162	0	0	0	203.079	973.881	0	0	0	0	0	0	0	0	0	0	0	697.773	0	0	0	0	0	580.727	455.178	0	1380.54	0	0	0	0	0	0	0	0	0
HMF000828	HMF000828A	722.334	601.362	0	0	0	0	0	367.416	0	0	0	0	244.444	0	0	0	0	531.878	0	0	0	0	0	0	0	0	0	0	0	732.832	0	0	0	0	0	254.942	143.467	0	610.86	0	0	0	0	0	0	0	0	0
HMF001597	HMF001597A	0	57294.7	0	0	0	0	0	0	0	0	0	0	24997.1	0	0	0	0	2403.49	0	0	0	0	0	0	0	0	0	0	0	0	0	0	0	0	0	0	0	0	0	0	0	0	0	0	0	0	0	0
HMF002809	HMF002809A	701.979	1224.72	1053.47	0	0	0	0	1732.48	0	0	0	0	694.989	0	0	0	667.03	1785.4	0	0	0	0	0	0	0	0	0	0	0	1049.97	0	0	0	0	0	988.063	408.406	0	1041.49	0	0	0	0	0	0	0	0	0
HMF000497	HMF000497A	0	521.005	4650.97	0	0	0	0	6312.17	0	0	0	0	1559.51	0	0	0	3826.38	0	0	0	0	0	0	0	0	0	0	0	0	1655.19	0	0	0	0	0	1207.33	1646.17	0	0	0	0	0	0	0	0	0	0	0
HMF003645	HMF003645A	473.653	173.008	214.889	0	0	0	0	181.484	0	0	0	0	0	0	0	0	0	642.672	0	0	0	0	0	0	0	0	0	0	0	521.018	0	0	0	0	0	257.268	257.767	0	362.469	0	0	0	0	0	0	0	0	0
HMF002801	HMF002801A	700.332	9307.41	384.682	0	0	0	0	0	0	0	0	0	12814.1	0	0	0	0	778.369	0	0	0	0	0	0	0	0	0	0	0	0	0	0	0	0	0	0	0	0	587.278	0	0	0	0	0	0	0	0	0
HMF003283	HMF003283A	685.086	10339.8	0	0	0	0	0	0	0	0	0	0	4297.68	0	0	0	0	771.66	0	0	0	0	0	0	0	0	0	0	0	787.674	0	0	0	0	0	0	250.714	0	398.341	0	0	0	0	0	0	0	0	0
HMF003363	HMF003363A	565.396	127.252	156.195	0	0	0	0	290.932	0	0	0	0	0	0	0	0	74.8539	692.149	0	0	0	0	0	0	0	0	0	0	0	641.248	0	0	0	0	0	358.301	279.454	0	372.772	0	0	0	0	0	0	0	0	0
HMF002652	HMF002652A	654.896	1686.73	2681.57	0	0	0	0	1103.82	0	0	0	0	1569.75	0	0	0	1322.79	1352.78	0	0	0	0	0	0	0	0	0	0	0	1025.84	0	0	0	0	0	401.436	603.904	0	0	0	0	0	0	0	0	0	0	0
HMF001269	HMF001269A	565.33	0	476.147	0	0	0	0	477.658	0	0	0	0	66.5094	0	0	0	105.81	835.399	0	0	0	0	0	0	0	0	0	0	0	536.106	0	0	0	0	0	442.388	0	0	0	0	0	0	0	0	0	0	0	0
HMF004136	HMF004136A	568.258	142.315	94.2086	0	0	0	0	229.508	0	0	0	0	0	0	0	0	0	485.074	0	0	0	0	0	0	0	0	0	0	0	529.172	0	0	0	0	0	217.983	168.373	0	222.994	0	0	0	0	0	0	0	0	0
HMF004215	HMF004215A	639.519	5302.51	1356.48	0	0	0	0	4212.33	0	0	0	0	6834.86	0	0	0	1319.01	1810.14	0	0	0	0	0	0	0	0	0	0	0	5297.02	0	0	0	0	0	0	772.919	0	0	0	0	0	0	0	0	0	0	0
HMF002075	HMF002075A	883.117	20314.2	1046.82	0	0	0	0	1419.29	0	0	0	0	13356.4	0	0	0	0	2336.45	0	0	0	0	0	0	0	0	0	0	0	0	0	0	0	0	0	1177.49	0	0	2313.93	0	0	0	0	0	0	0	0	0
HMF003099	HMF003099A	913.821	125.907	290.284	0	0	0	0	156.884	0	0	0	0	0	0	0	0	102.924	290.784	0	0	0	0	0	0	0	0	0	0	0	593.06	0	0	0	0	0	222.335	240.322	0	421.687	0	0	0	0	0	0	0	0	0
HMF000171	HMF000171A	1928.27	8564.08	1982.83	0	0	0	0	2475.91	0	0	0	0	7238.52	0	0	0	1017.2	1470.73	0	0	0	0	0	0	0	0	0	0	0	1562.84	0	0	0	0	0	885.042	0	0	973.646	0	0	0	0	0	0	0	0	0
HMF003443	HMF003443A	732.738	3933.65	650.599	0	0	0	0	532.9	0	0	0	0	3357.17	0	0	0	284.481	945.597	0	0	0	0	0	0	0	0	0	0	0	0	0	0	0	0	0	617.042	0	0	646.091	0	0	0	0	0	0	0	0	0
HMF002363	HMF002363A	1152.97	209.449	352.573	0	0	0	0	0	0	0	0	0	72.3099	0	0	0	88.2679	348.584	0	0	0	0	0	0	0	0	0	0	0	436.852	0	0	0	0	0	150.604	266.799	0	824.832	0	0	0	0	0	0	0	0	0
HMF002151	HMF002151A	610.811	2500.32	0	0	0	0	0	213.283	0	0	0	0	1013.85	0	0	0	0	200.767	0	0	0	0	0	0	0	0	0	0	0	357.975	0	0	0	0	0	0	108.144	0	0	0	0	0	0	0	0	0	0	0
HMF002473	HMF002473A	647.5	753.5	0	0	0	0	0	173	0	0	0	0	0	0	0	0	0	1838	0	0	0	0	0	0	0	0	0	0	0	745	0	0	0	0	0	435.5	0	0	0	0	0	0	0	0	0	0	0	0
HMF002524	HMF002524A	581.379	349.627	178.31	0	0	0	0	137.853	0	0	0	0	120.871	0	0	0	0	1112.31	0	0	0	0	0	0	0	0	0	0	0	248.235	0	0	0	0	0	234.25	113.379	0	176.312	0	0	0	0	0	0	0	0	0
HMF001559	HMF001559A	1444.19	387.783	275.346	0	0	0	0	625.651	0	0	0	0	0	0	0	0	221.876	2785.44	0	0	0	0	0	0	0	0	0	0	0	288.339	0	0	0	0	0	651.636	156.413	0	261.354	0	0	0	0	0	0	0	0	0
HMF000629	HMF000629A	0	1991.29	1151.86	0	0	0	0	2582.2	0	0	0	0	1695.84	0	0	0	198.131	1489.23	0	0	0	0	0	0	0	0	0	0	0	655.78	0	0	0	0	0	883.356	207.614	0	787.036	0	0	0	0	0	0	0	0	0
HMF001349	HMF001349A	566.659	206.376	615.629	0	0	0	0	1413.65	0	0	0	0	214.871	0	0	0	121.427	387.267	0	0	0	0	0	0	0	0	0	0	0	434.238	0	0	0	0	0	575.153	249.849	0	1023.88	0	0	0	0	0	0	0	0	0
HMF001425	HMF001425A	965.677	172.496	1063.89	0	0	0	0	4845.34	0	0	0	0	273.7	0	0	0	274.697	251.266	0	0	0	0	0	0	0	0	0	0	0	526.461	0	0	0	0	0	990.604	221.851	0	1190.02	0	0	0	0	0	0	0	0	0
HMF004315	HMF004315A	571.942	178.763	0	0	0	0	0	262.119	0	0	0	0	153.154	0	0	0	0	245.548	0	0	0	0	0	0	0	0	0	0	0	324.385	0	0	0	0	0	158.678	77.3302	0	371.587	0	0	0	0	0	0	0	0	0
HMF004286	HMF004286A	652.152	915.213	1262.29	0	0	0	0	1159.27	0	0	0	0	728.169	0	0	0	351.582	579.135	0	0	0	0	0	0	0	0	0	0	0	634.147	0	0	0	0	0	494.615	858.199	0	973.226	0	0	0	0	0	0	0	0	0
HMF004004	HMF004004A	1170.59	4184.62	581.795	0	0	0	0	0	0	0	0	0	6117.1	0	0	0	0	653.331	0	0	0	0	0	0	0	0	0	0	0	0	0	0	0	0	0	0	238.121	0	0	0	0	0	0	0	0	0	0	0
HMF001868	HMF001868A	786.647	5844.59	442.082	0	0	0	0	0	0	0	0	0	6388.69	0	0	0	0	1258.73	0	0	0	0	0	0	0	0	0	0	0	508.095	0	0	0	0	0	0	276.051	0	0	0	0	0	0	0	0	0	0	0
HMF000612	HMF000612A	552.899	619.327	9966.18	0	0	0	0	9221.98	0	0	0	0	3493.21	0	0	0	671.77	1082.82	0	0	0	0	0	0	0	0	0	0	0	2066.76	0	0	0	0	0	2810.95	2560.72	0	1479.39	0	0	0	0	0	0	0	0	0
HMF001502	HMF001502A	995.935	203.975	811.41	0	0	0	0	1932.52	0	0	0	0	253.846	0	0	0	254.345	2025.28	0	0	0	0	0	0	0	0	0	0	0	0	0	0	0	0	0	1313.12	277.785	0	956.536	0	0	0	0	0	0	0	0	0
HMF001275	HMF001275A	1093.25	4147.33	773.027	0	0	0	0	0	0	0	0	0	7973.44	0	0	0	0	373.255	0	0	0	0	0	0	0	0	0	0	0	750.512	0	0	0	0	0	0	386.764	0	798.044	0	0	0	0	0	0	0	0	0
HMF003174	HMF003174A	165.607	470.882	88.2903	0	0	0	0	116.224	0	0	0	0	387.081	0	0	0	61.8531	131.188	0	0	0	0	0	0	0	0	0	0	0	216.486	0	0	0	0	0	59.8579	108.742	0	0	0	0	0	0	0	0	0	0	0
HMF002448	HMF002448A	457.253	56.8422	104.63	0	0	0	0	153.424	0	0	0	0	0	0	0	0	0	213.284	0	0	0	0	0	0	0	0	0	0	0	239.442	0	0	0	0	0	91.5512	78.4724	0	173.042	0	0	0	0	0	0	0	0	0
HMF000087	HMF000087A	1357.71	3866.03	2368.74	0	0	0	0	1548.81	0	0	0	0	9161.81	0	0	0	293.154	859.951	0	0	0	0	0	0	0	0	0	0	0	1012.53	0	0	0	0	0	470.247	465.244	0	506.766	0	0	0	0	0	0	0	0	0
HMF001468	HMF001468A	854.839	2962.87	293.13	0	0	0	0	0	0	0	0	0	1798.37	0	0	0	0	865.862	0	0	0	0	0	0	0	0	0	0	0	369.294	0	0	0	0	0	289.122	0	0	237.511	0	0	0	0	0	0	0	0	0
HMF001801	HMF001801A	509.415	147.541	270.16	0	0	0	0	221.81	0	0	0	0	78.2565	0	0	0	0	227.791	0	0	0	0	0	0	0	0	0	0	0	358.385	0	0	0	0	0	131.591	72.2751	0	195.891	0	0	0	0	0	0	0	0	0
HMF003427	HMF003427A	1038.88	387.447	393.971	0	0	0	0	831.606	0	0	0	0	283.057	0	0	0	2418.53	453.193	0	0	0	0	0	0	0	0	0	0	0	675.021	0	0	0	0	0	495.35	401.5	0	921.442	0	0	0	0	0	0	0	0	0
HMF002233	HMF002233A	485.901	6907.3	219.908	0	0	0	0	0	0	0	0	0	2295.75	0	0	0	0	302.06	0	0	0	0	0	0	0	0	0	0	0	397.236	0	0	0	0	0	217.403	0	0	250.464	0	0	0	0	0	0	0	0	0
HMF002463	HMF002463A	581.513	938.328	505.446	0	0	0	0	847.247	0	0	0	0	342.302	0	0	0	96.0848	1498.32	0	0	0	0	0	0	0	0	0	0	0	752.164	0	0	0	0	0	649.073	0	0	516.456	0	0	0	0	0	0	0	0	0
HMF002873	HMF002873A	724.905	101.759	159.691	0	0	0	0	0	0	0	0	0	47.3531	0	0	0	0	268.502	0	0	0	0	0	0	0	0	0	0	0	355.652	0	0	0	0	0	0	203.014	0	554.132	0	0	0	0	0	0	0	0	0
HMF002521	HMF002521A	344.373	228.584	100.317	0	0	0	0	0	0	0	0	0	149.228	0	0	0	46.9146	234.074	0	0	0	0	0	0	0	0	0	0	0	354.355	0	0	0	0	0	0	159.709	0	165.199	0	0	0	0	0	0	0	0	0
HMF002412	HMF002412A	571.672	78.7302	271.293	0	0	0	0	144.422	0	0	0	0	63.1848	0	0	0	67.6979	447.308	0	0	0	0	0	0	0	0	0	0	0	638.868	0	0	0	0	0	183.537	171	0	440.287	0	0	0	0	0	0	0	0	0
HMF002258	HMF002258A	410.756	1428.39	146.591	0	0	0	0	135.084	0	0	0	0	902.062	0	0	0	0	0	0	0	0	0	0	0	0	0	0	0	0	421.763	0	0	0	0	0	0	190.118	0	245.653	0	0	0	0	0	0	0	0	0
HMF000435	HMF000435A	342.948	495.925	2986.55	0	0	0	0	6881.45	0	0	0	0	1734.74	0	0	0	355.946	470.928	0	0	0	0	0	0	0	0	0	0	0	1173.32	0	0	0	0	0	865.868	862.369	0	0	0	0	0	0	0	0	0	0	0
HMF003730	HMF003730A	578.696	863.808	182.93	0	0	0	0	262.681	0	0	0	0	107.166	0	0	0	0	321.498	0	0	0	0	0	0	0	0	0	0	0	660.442	0	0	0	0	0	196.388	170.967	0	308.538	0	0	0	0	0	0	0	0	0
HMF003291	HMF003291A	519.533	0	2003.06	0	0	0	0	978.504	0	0	0	0	208.214	0	0	0	251.258	507.521	0	0	0	0	0	0	0	0	0	0	0	375.385	0	0	0	0	0	336.345	704.723	0	845.868	0	0	0	0	0	0	0	0	0
HMF003414	HMF003414A	739.735	308.14	498.798	0	0	0	0	333.03	0	0	0	0	460.468	0	0	0	77.6572	215.051	0	0	0	0	0	0	0	0	0	0	0	528.667	0	0	0	0	0	0	197.628	0	162.782	0	0	0	0	0	0	0	0	0
HMF001174	HMF001174A	1712.85	22942.2	1125.23	0	0	0	0	0	0	0	0	0	10070.1	0	0	0	0	598.623	0	0	0	0	0	0	0	0	0	0	0	0	0	0	0	0	0	0	0	0	928.69	0	0	0	0	0	0	0	0	0
HMF001161	HMF001161A	632.543	116.141	0	0	0	0	0	116.141	0	0	0	0	0	0	0	0	0	203.371	0	0	0	0	0	0	0	0	0	0	0	323.499	0	0	0	0	0	109.661	75.7656	0	302.564	0	0	0	0	0	0	0	0	0
HMF001836	HMF001836A	675.384	261.761	0	0	0	0	0	0	0	0	0	0	0	0	0	0	0	195.322	0	0	0	0	0	0	0	0	0	0	0	361.67	0	0	0	0	0	103.905	165.849	0	325.203	0	0	0	0	0	0	0	0	0
HMF003337	HMF003337A	648.384	437.247	4017.58	0	0	0	0	7791.59	0	0	0	0	793.135	0	0	0	463.203	748.212	0	0	0	0	0	0	0	0	0	0	0	2523.16	0	0	0	0	0	1712.05	973.824	0	1386.61	0	0	0	0	0	0	0	0	0
HMF000452	HMF000452A	671.236	99.4608	835.171	0	0	0	0	388.847	0	0	0	0	108.957	0	0	0	123.951	558.28	0	0	0	0	0	0	0	0	0	0	0	745.207	0	0	0	0	0	379.85	753.203	0	415.836	0	0	0	0	0	0	0	0	0
HMF003691	HMF003691A	686.81	219.46	581.07	0	0	0	0	1329.73	0	0	0	0	174.072	0	0	0	223.949	801.528	0	0	0	0	0	0	0	0	0	0	0	1157.15	0	0	0	0	0	363.107	300.76	0	869.361	0	0	0	0	0	0	0	0	0
HMF003331	HMF003331A	1548.75	1679.47	1353.66	0	0	0	0	1619.6	0	0	0	0	1883.54	0	0	0	232.512	3042.61	0	0	0	0	0	0	0	0	0	0	0	803.312	0	0	0	0	0	1287.3	0	0	1522.3	0	0	0	0	0	0	0	0	0
HMF003665	HMF003665A	830.178	1766.81	502.305	0	0	0	0	879.659	0	0	0	0	943.634	0	0	0	0	1558.9	0	0	0	0	0	0	0	0	0	0	0	569.779	0	0	0	0	0	515.8	0	0	0	0	0	0	0	0	0	0	0	0
HMF001775	HMF001775A	644.217	18233	0	0	0	0	0	0	0	0	0	0	25049	0	0	0	0	1119.51	0	0	0	0	0	0	0	0	0	0	0	0	0	0	0	0	0	0	0	0	0	0	0	0	0	0	0	0	0	0
HMF003064	HMF003064A	420.741	660.302	0	0	0	0	0	252.143	0	0	0	0	217.417	0	0	0	0	0	0	0	0	0	0	0	0	0	0	0	0	636.145	0	0	0	0	0	0	223.959	0	398.094	0	0	0	0	0	0	0	0	0
HMF003563	HMF003563A	717.179	5612.23	887.459	0	0	0	0	642.556	0	0	0	0	2389.93	0	0	0	444.731	982.616	0	0	0	0	0	0	0	0	0	0	0	587.466	0	0	0	0	0	537.384	497.818	0	689.634	0	0	0	0	0	0	0	0	0
HMF002221	HMF002221A	1190.9	247.045	221.643	0	0	0	0	432.827	0	0	0	0	0	0	0	0	99.6149	468.688	0	0	0	0	0	0	0	0	0	0	0	628.072	0	0	0	0	0	363.096	309.802	0	515.507	0	0	0	0	0	0	0	0	0
HMF000390	HMF000390A	486.951	420.89	255.236	0	0	0	0	318.295	0	0	0	0	141.631	0	0	0	147.136	558.017	0	0	0	0	0	0	0	0	0	0	0	563.021	0	0	0	0	0	465.931	247.729	0	716.163	0	0	0	0	0	0	0	0	0
HMF001802	HMF001802A	634.713	174.471	302.817	0	0	0	0	184.999	0	0	0	0	217.086	0	0	0	96.7611	697.883	0	0	0	0	0	0	0	0	0	0	0	340.419	0	0	0	0	0	449.212	344.429	0	1004.21	0	0	0	0	0	0	0	0	0
HMF000101	HMF000101A	629.088	114.198	196.34	0	0	0	0	336.582	0	0	0	0	0	0	0	0	73.1265	419.225	0	0	0	0	0	0	0	0	0	0	0	658.139	0	0	0	0	0	226.392	200.347	0	282.489	0	0	0	0	0	0	0	0	0
HMF001945	HMF001945B	859.716	233.33	4571.97	0	0	0	0	3016.27	0	0	0	0	573.311	0	0	0	777.6	586.83	0	0	0	0	0	0	0	0	0	0	0	1128.1	0	0	0	0	0	882.748	1520.15	0	1760.99	0	0	0	0	0	0	0	0	0
HMF000867	HMF000867A	1138.86	0	648.85	0	0	0	0	1121.88	0	0	0	0	172.327	0	0	0	121.378	2084.91	0	0	0	0	0	0	0	0	0	0	0	398.101	0	0	0	0	0	676.323	0	0	385.114	0	0	0	0	0	0	0	0	0
HMF001036	HMF001036B	428.77	145.261	312.061	0	0	0	0	319.073	0	0	0	0	170.306	0	0	0	91.1638	946.701	0	0	0	0	0	0	0	0	0	0	0	415.246	0	0	0	0	0	390.201	322.079	0	912.139	0	0	0	0	0	0	0	0	0
HMF000035	HMF000035A	380.212	152.085	98.2006	0	0	0	0	197.408	0	0	0	0	49.3521	0	0	0	0	152.085	0	0	0	0	0	0	0	0	0	0	0	725.173	0	0	0	0	0	0	109.28	0	482.442	0	0	0	0	0	0	0	0	0
HMF002058	HMF002058A	902.928	2851.51	864.868	0	0	0	0	1381.69	0	0	0	0	1400.72	0	0	0	1325.1	351.055	0	0	0	0	0	0	0	0	0	0	0	1632.58	0	0	0	0	0	349.052	958.015	0	628.494	0	0	0	0	0	0	0	0	0
HMF003213	HMF003213A	891.667	949.548	873.704	0	0	0	0	1298.83	0	0	0	0	1957.98	0	0	0	220.547	304.873	0	0	0	0	0	0	0	0	0	0	0	625.215	0	0	0	0	0	0	721.517	0	1288.35	0	0	0	0	0	0	0	0	0
HMF000360	HMF000360A	1288.3	357.167	518.516	0	0	0	0	255.262	0	0	0	0	331.191	0	0	0	128.88	346.177	0	0	0	0	0	0	0	0	0	0	0	1140.94	0	0	0	0	0	381.144	605.935	0	1076.5	0	0	0	0	0	0	0	0	0
HMF000708	HMF000708A	1219	5855.69	1484.82	0	0	0	0	418.013	0	0	0	0	3117.33	0	0	0	0	410.004	0	0	0	0	0	0	0	0	0	0	0	1853.78	0	0	0	0	0	323.898	1724.12	0	492.104	0	0	0	0	0	0	0	0	0
HMF003055	HMF003055A	896.377	205.66	571.836	0	0	0	0	561.302	0	0	0	0	0	0	0	0	11068.5	0	0	0	0	0	0	0	0	0	0	0	0	829.663	0	0	0	0	0	0	816.12	0	0	0	0	0	0	0	0	0	0	0
HMF003315	HMF003315A	969.639	270.782	503.735	0	0	0	0	245.894	0	0	0	0	199.602	0	0	0	0	1122.45	0	0	0	0	0	0	0	0	0	0	0	495.273	0	0	0	0	0	520.658	322.052	0	958.191	0	0	0	0	0	0	0	0	0
HMF001252	HMF001252A	1309.63	7290.52	970.969	0	0	0	0	2092.51	0	0	0	0	5664.24	0	0	0	0	2459.69	0	0	0	0	0	0	0	0	0	0	0	1149.56	0	0	0	0	0	992.48	0	0	1262.11	0	0	0	0	0	0	0	0	0
HMF002044	HMF002044A	743.441	672.091	341.285	0	0	0	0	243.988	0	0	0	0	177.129	0	0	0	74.8431	324.819	0	0	0	0	0	0	0	0	0	0	0	502.946	0	0	0	0	0	0	433.591	0	673.588	0	0	0	0	0	0	0	0	0
HMF004012	HMF004012A	1516.61	1847.92	261.846	0	0	0	0	394.269	0	0	0	0	848.002	0	0	0	0	281.835	0	0	0	0	0	0	0	0	0	0	0	660.612	0	0	0	0	0	5606.21	3540.42	0	0	0	0	0	0	0	0	0	0	0
HMF004135	HMF004135A	910.717	230.928	392.878	0	0	0	0	211.434	0	0	0	0	386.38	0	0	0	143.455	1083.66	0	0	0	0	0	0	0	0	0	0	0	613.309	0	0	0	0	0	405.874	166.448	0	275.914	0	0	0	0	0	0	0	0	0
HMF003008	HMF003008A	1979.31	22628.3	0	0	0	0	0	0	0	0	0	0	10806.9	0	0	0	0	0	0	0	0	0	0	0	0	0	0	0	0	5296.67	0	0	0	0	0	42482.4	0	0	0	0	0	0	0	0	0	0	0	0
HMF003391	HMF003391A	560.211	116.879	285.647	0	0	0	0	295.219	0	0	0	0	82.1173	0	0	0	46.3484	407.06	0	0	0	0	0	0	0	0	0	0	0	410.083	0	0	0	0	0	176.326	244.841	0	235.269	0	0	0	0	0	0	0	0	0
HMF003804	HMF003804A	823.773	545.195	479.912	0	0	0	0	337.383	0	0	0	0	104.654	0	0	0	126.581	271.103	0	0	0	0	0	0	0	0	0	0	0	1267.31	0	0	0	0	0	350.839	237.713	0	440.542	0	0	0	0	0	0	0	0	0
HMF002268	HMF002268A	1156.26	325.261	227.23	0	0	0	0	554.502	0	0	0	0	310.179	0	0	0	764.64	356.932	0	0	0	0	0	0	0	0	0	0	0	511.771	0	0	0	0	0	242.312	318.223	0	404.691	0	0	0	0	0	0	0	0	0
HMF001042	HMF001042A	385.8	298.845	138.428	0	0	0	0	240.375	0	0	0	0	66.9653	0	0	0	48.4749	662.656	0	0	0	0	0	0	0	0	0	0	0	443.27	0	0	0	0	0	202.895	150.922	0	254.368	0	0	0	0	0	0	0	0	0
HMF000903	HMF000903A	685.653	1509.84	912.704	0	0	0	0	995.722	0	0	0	0	950.712	0	0	0	2784.62	3345.25	0	0	0	0	0	0	0	0	0	0	0	0	0	0	0	0	0	1163.26	0	0	900.701	0	0	0	0	0	0	0	0	0
HMF002241	HMF002241B	547.202	1245.19	265.114	0	0	0	0	308.55	0	0	0	0	798.336	0	0	0	0	2304.14	0	0	0	0	0	0	0	0	0	0	0	341.003	0	0	0	0	0	523.737	267.61	0	0	0	0	0	0	0	0	0	0	0
HMF000989	HMF000989A	405.678	1246.08	478.8	0	0	0	0	1212.03	0	0	0	0	812.859	0	0	0	1381.31	276.963	0	0	0	0	0	0	0	0	0	0	0	867.45	0	0	0	0	0	384.142	255.427	0	456.263	0	0	0	0	0	0	0	0	0
HMF000179	HMF000179B	425.909	0	2045.96	0	0	0	0	2127.54	0	0	0	0	0	0	0	0	189.682	567.045	0	0	0	0	0	0	0	0	0	0	0	1032.49	0	0	0	0	0	581.058	478.459	0	0	0	0	0	0	0	0	0	0	0
HMF003676	HMF003676A	284.565	376.085	6309.43	0	0	0	0	1250.28	0	0	0	0	2919.66	0	0	0	4207.45	0	0	0	0	0	0	0	0	0	0	0	0	0	0	0	0	0	0	517.617	506.615	0	1178.27	0	0	0	0	0	0	0	0	0
HMF000797	HMF000797A	411.311	0	0	0	0	0	0	0	0	0	0	0	62.047	0	0	0	58.5443	371.281	0	0	0	0	0	0	0	0	0	0	0	630.978	0	0	0	0	0	133.101	336.755	0	469.856	0	0	0	0	0	0	0	0	0
HMF004023	HMF004023A	768.929	2556.43	432.241	0	0	0	0	705.393	0	0	0	0	1854.03	0	0	0	0	695.388	0	0	0	0	0	0	0	0	0	0	0	1530.35	0	0	0	0	0	429.74	0	0	596.333	0	0	0	0	0	0	0	0	0
HMF003325	HMF003325A	1107.91	207.546	218.074	0	0	0	0	383.007	0	0	0	0	119.314	0	0	0	81.2136	440.158	0	0	0	0	0	0	0	0	0	0	0	410.079	0	0	0	0	0	199.023	263.192	0	372.48	0	0	0	0	0	0	0	0	0
HMF000054	HMF000054B	1058.8	497.964	5016.07	0	0	0	0	4746.13	0	0	0	0	1034.85	0	0	0	631.686	1128.65	0	0	0	0	0	0	0	0	0	0	0	1837.18	0	0	0	0	0	1340.71	1590.19	0	2035.77	0	0	0	0	0	0	0	0	0
HMF001427	HMF001427A	1071.62	405.534	873.84	0	0	0	0	1091.05	0	0	0	0	275.006	0	0	0	159.922	729.861	0	0	0	0	0	0	0	0	0	0	0	930.635	0	0	0	0	0	301.908	403.541	0	947.075	0	0	0	0	0	0	0	0	0
HMF002197	HMF002197A	690.015	143.296	1038.02	0	0	0	0	2015.62	0	0	0	0	338.517	0	0	0	143.795	255.136	0	0	0	0	0	0	0	0	0	0	0	1038.52	0	0	0	0	0	506.278	438.375	0	751.428	0	0	0	0	0	0	0	0	0
HMF000179	HMF000179A	441.689	0	2275.4	0	0	0	0	2383.82	0	0	0	0	141.401	0	0	0	217.847	677.024	0	0	0	0	0	0	0	0	0	0	0	1058.76	0	0	0	0	0	528.628	530.627	0	0	0	0	0	0	0	0	0	0	0
HMF004101	HMF004101A	1761.91	134.799	398.385	0	0	0	0	273.608	0	0	0	0	153.34	0	0	0	164.365	1037.8	0	0	0	0	0	0	0	0	0	0	0	358.296	0	0	0	0	0	246.547	253.062	0	396.881	0	0	0	0	0	0	0	0	0
HMF003851	HMF003851A	527.52	7740.63	0	0	0	0	0	0	0	0	0	0	3536.49	0	0	0	0	342.338	0	0	0	0	0	0	0	0	0	0	0	645.637	0	0	0	0	0	0	236.733	0	340.336	0	0	0	0	0	0	0	0	0
HMF001779	HMF001779A	658.993	5053.77	998.973	0	0	0	0	747.358	0	0	0	0	3725.8	0	0	0	1064.37	1156.23	0	0	0	0	0	0	0	0	0	0	0	957.037	0	0	0	0	0	700.429	411.371	0	1533.66	0	0	0	0	0	0	0	0	0
HMF002824	HMF002824B	1812.82	390.786	5258.34	0	0	0	0	3128.79	0	0	0	0	1266.93	0	0	0	4666.41	0	0	0	0	0	0	0	0	0	0	0	0	1906.39	0	0	0	0	0	0	2411.26	0	805.589	0	0	0	0	0	0	0	0	0
HMF001223	HMF001223C	1317.06	25819.7	2425.62	0	0	0	0	3840.18	0	0	0	0	31528.5	0	0	0	0	2857.14	0	0	0	0	0	0	0	0	0	0	0	1362.57	0	0	0	0	0	1002.05	0	0	1971.59	0	0	0	0	0	0	0	0	0
HMF000417	HMF000417A	1311.23	6115.88	1232.59	0	0	0	0	591.003	0	0	0	0	5923.05	0	0	0	0	1528.09	0	0	0	0	0	0	0	0	0	0	0	963.635	0	0	0	0	0	498.346	345.086	0	503.354	0	0	0	0	0	0	0	0	0
HMF001924	HMF001924A	796.545	11456	510.169	0	0	0	0	966.768	0	0	0	0	12719.7	0	0	0	0	1115.96	0	0	0	0	0	0	0	0	0	0	0	812.065	0	0	0	0	0	0	0	0	0	0	0	0	0	0	0	0	0	0
HMF002917	HMF002917A	203.771	447.996	2330.88	0	0	0	0	3104.51	0	0	0	0	933.449	0	0	0	335.622	782.619	0	0	0	0	0	0	0	0	0	0	0	1208.64	0	0	0	0	0	812.086	783.119	0	1052.32	0	0	0	0	0	0	0	0	0
HMF002481	HMF002481A	793.571	581.752	270.045	0	0	0	0	184.213	0	0	0	0	177.186	0	0	0	0	630.44	0	0	0	0	0	0	0	0	0	0	0	623.413	0	0	0	0	0	278.578	212.322	0	346.34	0	0	0	0	0	0	0	0	0
HMF000793	HMF000793A	301.608	238.295	2507.09	0	0	0	0	3598.36	0	0	0	0	592.747	0	0	0	690.458	396.827	0	0	0	0	0	0	0	0	0	0	0	615.181	0	0	0	0	0	873.916	633.627	0	1050.89	0	0	0	0	0	0	0	0	0
HMF000992	HMF000992A	767.743	222.796	541.435	0	0	0	0	354.768	0	0	0	0	77.7779	0	0	0	83.2976	366.309	0	0	0	0	0	0	0	0	0	0	0	821.937	0	0	0	0	0	244.373	164.588	0	272.975	0	0	0	0	0	0	0	0	0
HMF002539	HMF002539A	811.806	397.875	255.383	0	0	0	0	156.039	0	0	0	0	229.293	0	0	0	84.2914	641.718	0	0	0	0	0	0	0	0	0	0	0	295.02	0	0	0	0	0	358.238	230.798	0	589.538	0	0	0	0	0	0	0	0	0
HMF003792	HMF003792A	1285.09	256.318	511.636	0	0	0	0	681.016	0	0	0	0	417.703	0	0	0	129.908	898.861	0	0	0	0	0	0	0	0	0	0	0	279.301	0	0	0	0	0	736.476	538.117	0	1296.58	0	0	0	0	0	0	0	0	0
HMF002526	HMF002526A	342.555	10089.6	0	0	0	0	0	0	0	0	0	0	6441.03	0	0	0	0	944.651	0	0	0	0	0	0	0	0	0	0	0	0	0	0	0	0	0	0	0	0	0	0	0	0	0	0	0	0	0	0
HMF001727	HMF001727A	1057.98	2425.6	818.871	0	0	0	0	977.443	0	0	0	0	1660.75	0	0	0	283.128	1514.69	0	0	0	0	0	0	0	0	0	0	0	747.839	0	0	0	0	0	648.794	285.129	0	617.78	0	0	0	0	0	0	0	0	0
HMF001491	HMF001491A	1138.44	420.163	753.292	0	0	0	0	393.153	0	0	0	0	359.64	0	0	0	205.08	627.744	0	0	0	0	0	0	0	0	0	0	0	422.164	0	0	0	0	0	257.1	301.617	0	276.607	0	0	0	0	0	0	0	0	0
HMF003154	HMF003154A	963.686	1318.2	627.145	0	0	0	0	1041.08	0	0	0	0	1079.53	0	0	0	142.306	495.325	0	0	0	0	0	0	0	0	0	0	0	739.991	0	0	0	0	0	247.662	561.734	0	0	0	0	0	0	0	0	0	0	0
HMF002495	HMF002495A	490.823	10186.8	555.3	0	0	0	0	0	0	0	0	0	17177.3	0	0	0	0	1657.4	0	0	0	0	0	0	0	0	0	0	0	0	0	0	0	0	0	0	0	0	0	0	0	0	0	0	0	0	0	0
HMF002325	HMF002325A	746.857	2334.86	0	0	0	0	0	255.937	0	0	0	0	1030.23	0	0	0	0	211.036	0	0	0	0	0	0	0	0	0	0	0	663.541	0	0	0	0	0	156.157	200.559	0	385.652	0	0	0	0	0	0	0	0	0
HMF003092	HMF003092A	531.241	96.8172	252.327	0	0	0	0	318.544	0	0	0	0	0	0	0	0	63.7087	372.22	0	0	0	0	0	0	0	0	0	0	0	420.879	0	0	0	0	0	164.539	253.33	0	235.772	0	0	0	0	0	0	0	0	0
HMF000953	HMF000953A	506.562	6926.69	0	0	0	0	0	0	0	0	0	0	6228.42	0	0	0	0	590.155	0	0	0	0	0	0	0	0	0	0	0	571.635	0	0	0	0	0	369.911	230.256	0	430.478	0	0	0	0	0	0	0	0	0
HMF002535	HMF002535A	714.708	375.134	0	0	0	0	0	271.96	0	0	0	0	0	0	0	0	0	522.383	0	0	0	0	0	0	0	0	0	0	0	789.835	0	0	0	0	0	210.856	226.383	0	391.662	0	0	0	0	0	0	0	0	0
HMF003511	HMF003511A	764.221	6277.71	224.918	0	0	0	0	401.853	0	0	0	0	1300.03	0	0	0	0	453.335	0	0	0	0	0	0	0	0	0	0	0	818.201	0	0	0	0	0	0	229.416	0	299.891	0	0	0	0	0	0	0	0	0
HMF003105	HMF003105A	567.372	165.609	79.0518	0	0	0	0	0	0	0	0	0	0	0	0	0	0	262.672	0	0	0	0	0	0	0	0	0	0	0	435.285	0	0	0	0	0	180.118	132.587	0	357.735	0	0	0	0	0	0	0	0	0
HMF002952	HMF002952A	664.404	199.821	3052.76	0	0	0	0	3514.85	0	0	0	0	494.556	0	0	0	309.722	774.805	0	0	0	0	0	0	0	0	0	0	0	1310.82	0	0	0	0	0	696.375	876.713	0	0	0	0	0	0	0	0	0	0	0
HMF001064	HMF001064A	626.778	175.619	104.968	0	0	0	0	214.477	0	0	0	0	0	0	0	0	52.4839	262.419	0	0	0	0	0	0	0	0	0	0	0	477.906	0	0	0	0	0	116.07	169.563	0	311.371	0	0	0	0	0	0	0	0	0
HMF003447	HMF003447A	1268.95	1743.49	2416.25	0	0	0	0	13064.9	0	0	0	0	1855.61	0	0	0	902.528	1884.15	0	0	0	0	0	0	0	0	0	0	0	3820.35	0	0	0	0	0	2365.7	1123.78	0	1592.31	0	0	0	0	0	0	0	0	0
HMF001504	HMF001504A	468.203	479.207	1230.53	0	0	0	0	1166	0	0	0	0	418.181	0	0	0	254.61	1105.98	0	0	0	0	0	0	0	0	0	0	0	516.223	0	0	0	0	0	660.786	345.65	0	1444.62	0	0	0	0	0	0	0	0	0
HMF001947	HMF001947A	2157.5	716.006	807.379	0	0	0	0	1056.53	0	0	0	0	533.26	0	0	0	324.549	3039.78	0	0	0	0	0	0	0	0	0	0	0	1185.85	0	0	0	0	0	1323.16	628.627	0	1191.35	0	0	0	0	0	0	0	0	0
HMF001055	HMF001055A	648.184	6653.52	0	0	0	0	0	781.324	0	0	0	0	7142.53	0	0	0	614.148	853.901	0	0	0	0	0	0	0	0	0	0	0	1012.07	0	0	0	0	0	0	616.651	0	521.05	0	0	0	0	0	0	0	0	0
HMF004244	HMF004244A	453.648	577.324	304.435	0	0	0	0	173.748	0	0	0	0	130.186	0	0	0	79.113	311.445	0	0	0	0	0	0	0	0	0	0	0	623.891	0	0	0	0	0	192.275	111.659	0	193.276	0	0	0	0	0	0	0	0	0
HMF003817	HMF003817A	941.31	239.46	334.643	0	0	0	0	533.526	0	0	0	0	185.356	0	0	0	0	837.61	0	0	0	0	0	0	0	0	0	0	0	723.391	0	0	0	0	0	345.665	224.432	0	1022.97	0	0	0	0	0	0	0	0	0
HMF003938	HMF003938A	551.885	0	284.925	0	0	0	0	539.411	0	0	0	0	0	0	0	0	93.8106	625.736	0	0	0	0	0	0	0	0	0	0	0	663.161	0	0	0	0	0	328.836	317.359	0	666.654	0	0	0	0	0	0	0	0	0
HMF004104	HMF004104A	680.128	344.578	1206.78	0	0	0	0	1423.45	0	0	0	0	463.952	0	0	0	178.559	437.369	0	0	0	0	0	0	0	0	0	0	0	1474.11	0	0	0	0	0	228.214	758.875	0	473.983	0	0	0	0	0	0	0	0	0
HMF002988	HMF002988A	1245.2	1291.45	1038.09	0	0	0	0	0	0	0	0	0	888.783	0	0	0	189.52	2140.02	0	0	0	0	0	0	0	0	0	0	0	0	0	0	0	0	0	1173.82	354.91	0	1587.04	0	0	0	0	0	0	0	0	0
HMF001496	HMF001496A	908.317	589.855	1025.99	0	0	0	0	793.15	0	0	0	0	239.347	0	0	0	413.6	1051.52	0	0	0	0	0	0	0	0	0	0	0	1361.97	0	0	0	0	0	507.736	617.395	0	1114.12	0	0	0	0	0	0	0	0	0
HMF000150	HMF000150A	394.861	6774.7	213.195	0	0	0	0	0	0	0	0	0	3629.32	0	0	0	0	368.337	0	0	0	0	0	0	0	0	0	0	0	275.252	0	0	0	0	0	0	281.257	0	454.416	0	0	0	0	0	0	0	0	0
HMF000235	HMF000235A	359.786	0	1580.76	0	0	0	0	3902.61	0	0	0	0	312.749	0	0	0	286.228	290.231	0	0	0	0	0	0	0	0	0	0	0	859.684	0	0	0	0	0	811.146	416.832	0	462.368	0	0	0	0	0	0	0	0	0
HMF002638	HMF002638A	951.351	253.427	400.595	0	0	0	0	458.963	0	0	0	0	276.376	0	0	0	0	1231.22	0	0	0	0	0	0	0	0	0	0	0	736.336	0	0	0	0	0	463.952	370.164	0	988.267	0	0	0	0	0	0	0	0	0
HMF001128	HMF001128A	864.5	209	1031	0	0	0	0	1382.5	0	0	0	0	494	0	0	0	125.5	789.5	0	0	0	0	0	0	0	0	0	0	0	919.5	0	0	0	0	0	589.5	242.5	0	1032.5	0	0	0	0	0	0	0	0	0
HMF003459	HMF003459A	603.248	128.053	626.257	0	0	0	0	617.254	0	0	0	0	186.577	0	0	0	160.066	326.634	0	0	0	0	0	0	0	0	0	0	0	800.829	0	0	0	0	0	328.135	442.682	0	649.267	0	0	0	0	0	0	0	0	0
HMF000766	HMF000766A	1077.54	307.012	1498.56	0	0	0	0	1508.56	0	0	0	0	412.016	0	0	0	3719.65	807.532	0	0	0	0	0	0	0	0	0	0	0	618.025	0	0	0	0	0	602.524	1029.54	0	912.037	0	0	0	0	0	0	0	0	0
HMF000130	HMF000130A	1135.1	214.056	712.013	0	0	0	0	1550.15	0	0	0	0	368.317	0	0	0	0	851.702	0	0	0	0	0	0	0	0	0	0	0	1755.16	0	0	0	0	0	360.78	247.722	0	0	0	0	0	0	0	0	0	0	0
HMF000768	HMF000768A	996.465	303.25	2519.23	0	0	0	0	1570.39	0	0	0	0	535.826	0	0	0	1955.34	306.759	0	0	0	0	0	0	0	0	0	0	0	413.022	0	0	0	0	0	440.59	1079.67	0	1399.46	0	0	0	0	0	0	0	0	0
HMF002114	HMF002114A	392.641	2514.2	2045.63	0	0	0	0	4969.46	0	0	0	0	3496.8	0	0	0	282.742	807.762	0	0	0	0	0	0	0	0	0	0	0	1046.54	0	0	0	0	0	1103.49	391.642	0	1004.08	0	0	0	0	0	0	0	0	0
HMF000657	HMF000657A	404.03	795.559	858.564	0	0	0	0	1110.08	0	0	0	0	828.062	0	0	0	186.014	424.032	0	0	0	0	0	0	0	0	0	0	0	857.564	0	0	0	0	0	320.024	459.034	0	474.035	0	0	0	0	0	0	0	0	0
HMF000620	HMF000620A	277.263	392.58	473.302	0	0	0	0	836.802	0	0	0	0	497.368	0	0	0	2747.56	0	0	0	0	0	0	0	0	0	0	0	0	597.143	0	0	0	0	0	0	304.839	0	0	0	0	0	0	0	0	0	0	0
HMF000100	HMF000100A	1291.11	254.218	627.038	0	0	0	0	313.769	0	0	0	0	248.713	0	0	0	86.0739	333.286	0	0	0	0	0	0	0	0	0	0	0	558.98	0	0	0	0	0	0	348.799	0	485.417	0	0	0	0	0	0	0	0	0
HMF000221	HMF000221A	1407.18	316.317	978.432	0	0	0	0	273.841	0	0	0	0	253.853	0	0	0	97.9432	839.513	0	0	0	0	0	0	0	0	0	0	0	700.594	0	0	0	0	0	313.818	394.771	0	457.734	0	0	0	0	0	0	0	0	0
HMF003104	HMF003104A	898.917	184.599	131.928	0	0	0	0	360.169	0	0	0	0	73.7393	0	0	0	0	201.153	0	0	0	0	0	0	0	0	0	0	0	655.627	0	0	0	0	0	0	186.606	0	543.263	0	0	0	0	0	0	0	0	0
HMF001103	HMF001103A	0	4140.5	663.66	0	0	0	0	0	0	0	0	0	4731.14	0	0	0	441.606	9191.22	0	0	0	0	0	0	0	0	0	0	0	0	0	0	0	0	0	1070.26	0	0	0	0	0	0	0	0	0	0	0	0
HMF000266	HMF000266A	939.925	713.962	142.792	0	0	0	0	355.227	0	0	0	0	115.236	0	0	0	137.782	229.47	0	0	0	0	0	0	0	0	0	0	0	1122.8	0	0	0	0	0	280.575	264.542	0	580.689	0	0	0	0	0	0	0	0	0
HMF000193	HMF000193A	436.904	634.907	1474.3	0	0	0	0	1800.98	0	0	0	0	727.674	0	0	0	218.452	515.706	0	0	0	0	0	0	0	0	0	0	0	959.094	0	0	0	0	0	576.055	437.901	0	787.025	0	0	0	0	0	0	0	0	0
HMF000959	HMF000959A	1563.68	1401.01	0	0	0	0	0	0	0	0	0	0	0	0	0	0	154.166	768.327	0	0	0	0	0	0	0	0	0	0	0	1969.12	0	0	0	0	0	729.786	576.621	0	1497.61	0	0	0	0	0	0	0	0	0
HMF002887	HMF002887A	1060.28	1816.83	410.301	0	0	0	0	430.316	0	0	0	0	522.383	0	0	0	108.079	415.305	0	0	0	0	0	0	0	0	0	0	0	759.057	0	0	0	0	0	358.763	353.76	0	578.925	0	0	0	0	0	0	0	0	0
HMF000116	HMF000116A	738.751	1934.04	0	0	0	0	0	0	0	0	0	0	0	0	0	0	0	569.423	0	0	0	0	0	0	0	0	0	0	0	587.405	0	0	0	0	0	330.665	200.297	0	362.133	0	0	0	0	0	0	0	0	0
HMF000915	HMF000915A	868.411	383.004	222.875	0	0	0	0	115.955	0	0	0	0	213.84	0	0	0	0	579.275	0	0	0	0	0	0	0	0	0	0	0	407.099	0	0	0	0	0	196.773	163.643	0	247.974	0	0	0	0	0	0	0	0	0
HMF000370	HMF000370A	355.527	644.05	4775.37	0	0	0	0	5372.91	0	0	0	0	2208.17	0	0	0	1814.64	0	0	0	0	0	0	0	0	0	0	0	0	1186.59	0	0	0	0	0	810.562	1125.09	0	976.075	0	0	0	0	0	0	0	0	0
HMF001340	HMF001340A	771.32	233.248	1368.95	0	0	0	0	1720.33	0	0	0	0	344.866	0	0	0	224.238	453.482	0	0	0	0	0	0	0	0	0	0	0	1684.29	0	0	0	0	0	468.998	442.47	0	757.805	0	0	0	0	0	0	0	0	0
HMF001339	HMF001339A	671.08	0	1261.53	0	0	0	0	1176.89	0	0	0	0	0	0	0	0	201.324	597.462	0	0	0	0	0	0	0	0	0	0	0	643.536	0	0	0	0	0	464.748	393.133	0	958.543	0	0	0	0	0	0	0	0	0
HMF001931	HMF001931A	1006.42	503.956	103.286	0	0	0	0	217.549	0	0	0	0	0	0	0	0	59.377	504.455	0	0	0	0	0	0	0	0	0	0	0	885.166	0	0	0	0	0	187.112	142.205	0	252.477	0	0	0	0	0	0	0	0	0
HMF000935	HMF000935A	369.326	137.681	211.546	0	0	0	0	469.823	0	0	0	0	65.3229	0	0	0	121.099	1006.48	0	0	0	0	0	0	0	0	0	0	0	397.465	0	0	0	0	0	424.599	181.899	0	356.764	0	0	0	0	0	0	0	0	0
HMF002951	HMF002951A	0	17239.9	1150.56	0	0	0	0	0	0	0	0	0	20054.9	0	0	0	0	2150.98	0	0	0	0	0	0	0	0	0	0	0	0	0	0	0	0	0	727.669	0	0	1194.1	0	0	0	0	0	0	0	0	0
HMF000773	HMF000773A	1266.96	770.426	160.819	0	0	0	0	0	0	0	0	0	0	0	0	0	0	792.538	0	0	0	0	0	0	0	0	0	0	0	791.533	0	0	0	0	0	384.962	0	0	353.803	0	0	0	0	0	0	0	0	0
HMF000908	HMF000908A	764.816	517.875	307.426	0	0	0	0	314.924	0	0	0	0	0	0	0	0	106.974	520.375	0	0	0	0	0	0	0	0	0	0	0	709.829	0	0	0	0	0	241.442	196.453	0	435.395	0	0	0	0	0	0	0	0	0
HMF003780	HMF003780A	494.521	165.672	218.567	0	0	0	0	384.239	0	0	0	0	0	0	0	0	144.214	408.192	0	0	0	0	0	0	0	0	0	0	0	886.245	0	0	0	0	0	423.661	323.859	0	532.446	0	0	0	0	0	0	0	0	0
HMF001536	HMF001536A	0	1666.44	2694.36	0	0	0	0	3314.41	0	0	0	0	1620.51	0	0	0	363.941	594.088	0	0	0	0	0	0	0	0	0	0	0	1088.83	0	0	0	0	0	811.254	776.807	0	874.157	0	0	0	0	0	0	0	0	0
HMF000170	HMF000170A	0	936.231	2762.66	0	0	0	0	6254.38	0	0	0	0	1296.01	0	0	0	409.82	1538.7	0	0	0	0	0	0	0	0	0	0	0	1913.99	0	0	0	0	0	1468.65	999.28	0	760.093	0	0	0	0	0	0	0	0	0
HMF003626	HMF003626A	781.372	4952.02	637.987	0	0	0	0	497.1	0	0	0	0	5618.48	0	0	0	0	1180.05	0	0	0	0	0	0	0	0	0	0	0	319.243	0	0	0	0	0	274.779	619.002	0	590.525	0	0	0	0	0	0	0	0	0
HMF003296	HMF003296A	929.595	92.2575	297.831	0	0	0	0	442.234	0	0	0	0	85.2379	0	0	0	92.2575	266.745	0	0	0	0	0	0	0	0	0	0	0	870.43	0	0	0	0	0	143.4	520.453	0	558.559	0	0	0	0	0	0	0	0	0
HMF000965	HMF000965A	519.522	385.258	355.199	0	0	0	0	1385.73	0	0	0	0	178.852	0	0	0	122.24	543.068	0	0	0	0	0	0	0	0	0	0	0	1254.97	0	0	0	0	0	773.522	284.059	0	1313.58	0	0	0	0	0	0	0	0	0
HMF003738	HMF003738A	548.331	14591.3	764.962	0	0	0	0	0	0	0	0	0	20576.4	0	0	0	0	0	0	0	0	0	0	0	0	0	0	0	0	0	0	0	0	0	0	0	0	0	0	0	0	0	0	0	0	0	0	0
HMF001580	HMF001580A	1010.5	334.5	986	0	0	0	0	543.5	0	0	0	0	552.5	0	0	0	317	840	0	0	0	0	0	0	0	0	0	0	0	616.5	0	0	0	0	0	493.5	1150	0	953	0	0	0	0	0	0	0	0	0
HMF003102	HMF003102A	463.579	145.839	0	0	0	0	0	329.267	0	0	0	0	0	0	0	0	0	350.315	0	0	0	0	0	0	0	0	0	0	0	851.983	0	0	0	0	0	228.031	198.963	0	303.206	0	0	0	0	0	0	0	0	0
HMF003389	HMF003389A	1713.22	1028.13	569.074	0	0	0	0	575.074	0	0	0	0	784.101	0	0	0	132.017	612.079	0	0	0	0	0	0	0	0	0	0	0	825.107	0	0	0	0	0	379.549	345.045	0	763.599	0	0	0	0	0	0	0	0	0
HMF002252	HMF002252A	589.124	338.709	1605.25	0	0	0	0	2345.02	0	0	0	0	516.294	0	0	0	160.625	553.707	0	0	0	0	0	0	0	0	0	0	0	904.887	0	0	0	0	0	795.143	354.173	0	614.066	0	0	0	0	0	0	0	0	0
HMF000848	HMF000848A	530.702	0	3053.16	0	0	0	0	2741.05	0	0	0	0	362.638	0	0	0	218.083	601.729	0	0	0	0	0	0	0	0	0	0	0	730.278	0	0	0	0	0	757.789	732.279	0	693.264	0	0	0	0	0	0	0	0	0
HMF003625	HMF003625A	629.34	21437.1	0	0	0	0	0	0	0	0	0	0	5933.42	0	0	0	0	0	0	0	0	0	0	0	0	0	0	0	0	592.291	0	0	0	0	0	0	0	0	566.256	0	0	0	0	0	0	0	0	0
HMF001971	HMF001971A	0	0	1730.93	0	0	0	0	0	0	0	0	0	2034.6	0	0	0	63179.5	0	0	0	0	0	0	0	0	0	0	0	0	0	0	0	0	0	0	0	0	0	0	0	0	0	0	0	0	0	0	0
HMF002424	HMF002424A	463.865	430.91	141.806	0	0	0	0	0	0	0	0	0	0	0	0	0	0	355.513	0	0	0	0	0	0	0	0	0	0	0	433.906	0	0	0	0	0	294.597	163.776	0	431.41	0	0	0	0	0	0	0	0	0
HMF003448	HMF003448A	1315.68	4257.43	902.151	0	0	0	0	655.336	0	0	0	0	4451.18	0	0	0	0	253.323	0	0	0	0	0	0	0	0	0	0	0	952.215	0	0	0	0	0	289.369	487.122	0	771.485	0	0	0	0	0	0	0	0	0
HMF002435	HMF002435A	681.126	226.71	1154.48	0	0	0	0	946.202	0	0	0	0	321.878	0	0	0	109.618	428.507	0	0	0	0	0	0	0	0	0	0	0	731.451	0	0	0	0	0	486.803	282.017	0	513.211	0	0	0	0	0	0	0	0	0
HMF000082	HMF000082A	642.121	1930.36	686.63	0	0	0	0	533.601	0	0	0	0	1068.7	0	0	0	271.551	1653.81	0	0	0	0	0	0	0	0	0	0	0	523.599	0	0	0	0	0	958.181	1013.19	0	1307.25	0	0	0	0	0	0	0	0	0
HMF003238	HMF003238A	3541.1	637.597	712.226	0	0	0	0	1694.42	0	0	0	0	297.011	0	0	0	275.975	2638.04	0	0	0	0	0	0	0	0	0	0	0	721.742	0	0	0	0	0	1182.03	446.268	0	1215.59	0	0	0	0	0	0	0	0	0
HMF003306	HMF003306A	869.08	601.055	373.034	0	0	0	0	185.517	0	0	0	0	173.516	0	0	0	92.5085	1331.62	0	0	0	0	0	0	0	0	0	0	0	853.579	0	0	0	0	0	536.549	113.01	0	303.528	0	0	0	0	0	0	0	0	0
HMF000504	HMF000504A	513.729	2463.5	877.245	0	0	0	0	887.26	0	0	0	0	2207.63	0	0	0	161.73	564.301	0	0	0	0	0	0	0	0	0	0	0	884.255	0	0	0	0	0	423.601	402.071	0	1180.68	0	0	0	0	0	0	0	0	0
HMF003453	HMF003453A	977.716	4269.18	0	0	0	0	0	497.628	0	0	0	0	992.249	0	0	0	0	388.881	0	0	0	0	0	0	0	0	0	0	0	1084.96	0	0	0	0	0	0	232.026	0	436.489	0	0	0	0	0	0	0	0	0
HMF003981	HMF003981A	489.586	8182.29	1440.72	0	0	0	0	831.995	0	0	0	0	12458.9	0	0	0	0	2147.07	0	0	0	0	0	0	0	0	0	0	0	662.292	0	0	0	0	0	500.599	732.877	0	464.055	0	0	0	0	0	0	0	0	0
HMF003997	HMF003997A	821.596	139.942	147.466	0	0	0	0	361.141	0	0	0	0	0	0	0	0	64.2029	404.779	0	0	0	0	0	0	0	0	0	0	0	616.448	0	0	0	0	0	324.525	162.012	0	256.31	0	0	0	0	0	0	0	0	0
HMF004127	HMF004127A	884.23	295.411	0	0	0	0	0	194.771	0	0	0	0	0	0	0	0	0	705.982	0	0	0	0	0	0	0	0	0	0	0	712.491	0	0	0	0	0	323.45	124.673	0	234.827	0	0	0	0	0	0	0	0	0
HMF003071	HMF003071A	944.638	349.083	633.782	0	0	0	0	1188.09	0	0	0	0	247.98	0	0	0	101.606	298.28	0	0	0	0	0	0	0	0	0	0	0	938.099	0	0	0	0	0	229.872	285.705	0	479.864	0	0	0	0	0	0	0	0	0
HMF000802	HMF000802A	696.918	749.525	630.282	0	0	0	0	828.686	0	0	0	0	410.836	0	0	0	0	1789.64	0	0	0	0	0	0	0	0	0	0	0	1448.95	0	0	0	0	0	609.239	499.015	0	611.243	0	0	0	0	0	0	0	0	0
HMF003614	HMF003614A	509.423	142.176	194.927	0	0	0	0	0	0	0	0	0	54.258	0	0	0	49.2341	1060.04	0	0	0	0	0	0	0	0	0	0	0	375.285	0	0	0	0	0	291.888	0	0	198.444	0	0	0	0	0	0	0	0	0
HMF003401	HMF003401A	304.147	1022.49	3719.8	0	0	0	0	5032.43	0	0	0	0	1565.26	0	0	0	578.279	1236.6	0	0	0	0	0	0	0	0	0	0	0	1688.31	0	0	0	0	0	1878.91	439.212	0	1182.57	0	0	0	0	0	0	0	0	0
HMF001713	HMF001713A	474.874	704.829	1439.09	0	0	0	0	3957.62	0	0	0	0	848.489	0	0	0	426.489	0	0	0	0	0	0	0	0	0	0	0	0	852.479	0	0	0	0	0	879.416	476.87	0	746.231	0	0	0	0	0	0	0	0	0
HMF002904	HMF002904A	398.671	724.178	192.119	0	0	0	0	271.256	0	0	0	0	0	0	0	0	55.2466	336.954	0	0	0	0	0	0	0	0	0	0	0	713.726	0	0	0	0	0	131.895	260.804	0	479.799	0	0	0	0	0	0	0	0	0
HMF001017	HMF001017A	597.387	407.874	0	0	0	0	0	303.916	0	0	0	0	0	0	0	0	149.72	210.403	0	0	0	0	0	0	0	0	0	0	0	533.718	0	0	0	0	0	236.269	105.948	0	322.32	0	0	0	0	0	0	0	0	0
HMF001084	HMF001084A	1938	1902.01	1743.55	0	0	0	0	1308.66	0	0	0	0	2478.86	0	0	0	239.938	1873.52	0	0	0	0	0	0	0	0	0	0	0	575.852	0	0	0	0	0	1365.65	0	0	1883.51	0	0	0	0	0	0	0	0	0
HMF000968	HMF000968A	871.241	91.4979	0	0	0	0	0	166.405	0	0	0	0	0	0	0	0	0	119.148	0	0	0	0	0	0	0	0	0	0	0	527.369	0	0	0	0	0	161.881	162.886	0	388.614	0	0	0	0	0	0	0	0	0
HMF001033	HMF001033A	617.801	359.338	1361.57	0	0	0	0	1357.05	0	0	0	0	0	0	0	0	402.499	1038.87	0	0	0	0	0	0	0	0	0	0	0	918.421	0	0	0	0	0	889.312	527.465	0	934.481	0	0	0	0	0	0	0	0	0
HMF000964	HMF000964A	28480.6	0	4519.4	0	0	0	0	10100.1	0	0	0	0	0	0	0	0	46749.2	0	0	0	0	0	0	0	0	0	0	0	0	0	0	0	0	0	0	61448.1	104418	0	0	0	0	0	0	0	0	0	0	0
HMF000637	HMF000637A	504.177	1713.1	0	0	0	0	0	194.568	0	0	0	0	1184.92	0	0	0	0	571.701	0	0	0	0	0	0	0	0	0	0	0	548.692	0	0	0	0	0	190.567	192.067	0	421.648	0	0	0	0	0	0	0	0	0
HMF003287	HMF003287A	464.051	390.464	1981.85	0	0	0	0	3188.29	0	0	0	0	553.157	0	0	0	259.308	1037.23	0	0	0	0	0	0	0	0	0	0	0	1282.52	0	0	0	0	0	834.492	609.224	0	761.405	0	0	0	0	0	0	0	0	0
HMF001521	HMF001521A	626.989	1227.96	937.732	0	0	0	0	626.989	0	0	0	0	850.664	0	0	0	0	540.422	0	0	0	0	0	0	0	0	0	0	0	522.908	0	0	0	0	0	474.871	312.244	0	847.161	0	0	0	0	0	0	0	0	0
HMF002611	HMF002611A	493.357	691.303	1292.68	0	0	0	0	1441.39	0	0	0	0	1078.65	0	0	0	115.05	317.015	0	0	0	0	0	0	0	0	0	0	0	630.513	0	0	0	0	0	270.794	575.249	0	0	0	0	0	0	0	0	0	0	0
HMF001619	HMF001619A	0	322.4	1134.93	0	0	0	0	2689.18	0	0	0	0	0	0	0	0	9803.57	0	0	0	0	0	0	0	0	0	0	0	0	1190.67	0	0	0	0	0	584.036	1143.47	0	0	0	0	0	0	0	0	0	0	0
HMF000218	HMF000218A	1861.02	584.694	1042.95	0	0	0	0	887.535	0	0	0	0	547.713	0	0	0	0	1664.63	0	0	0	0	0	0	0	0	0	0	0	979.487	0	0	0	0	0	429.775	288.849	0	0	0	0	0	0	0	0	0	0	0
HMF000567	HMF000567A	1111.41	142.63	619.738	0	0	0	0	2049.56	0	0	0	0	334.478	0	0	0	218.465	463.046	0	0	0	0	0	0	0	0	0	0	0	2485.48	0	0	0	0	0	226.501	160.208	0	0	0	0	0	0	0	0	0	0	0
HMF002980	HMF002980B	1041.63	258.4	215.249	0	0	0	0	499.238	0	0	0	0	0	0	0	0	156.545	3491.16	0	0	0	0	0	0	0	0	0	0	0	1146.49	0	0	0	0	0	959.34	185.646	0	329.146	0	0	0	0	0	0	0	0	0
HMF002181	HMF002181A	822.591	272.696	290.209	0	0	0	0	423.304	0	0	0	0	164.118	0	0	0	93.0669	452.325	0	0	0	0	0	0	0	0	0	0	0	629.953	0	0	0	0	0	0	318.229	0	655.471	0	0	0	0	0	0	0	0	0
HMF003837	HMF003837A	283.834	3386.49	3057.6	0	0	0	0	3962.17	0	0	0	0	4354.13	0	0	0	1228.45	625.237	0	0	0	0	0	0	0	0	0	0	0	1781.1	0	0	0	0	0	568.169	945.614	0	602.21	0	0	0	0	0	0	0	0	0
HMF004129	HMF004129A	584.232	185.892	139.795	0	0	0	0	326.188	0	0	0	0	0	0	0	0	110.232	314.163	0	0	0	0	0	0	0	0	0	0	0	709.496	0	0	0	0	0	398.841	197.917	0	534.127	0	0	0	0	0	0	0	0	0
HMF002701	HMF002701A	2060.54	346.25	188.592	0	0	0	0	464.494	0	0	0	0	115.25	0	0	0	0	1181.44	0	0	0	0	0	0	0	0	0	0	0	686.014	0	0	0	0	0	492.434	375.188	0	485.948	0	0	0	0	0	0	0	0	0
HMF000261	HMF000261A	0	38982.6	1323.06	0	0	0	0	0	0	0	0	0	46150.2	0	0	0	0	0	0	0	0	0	0	0	0	0	0	0	0	0	0	0	0	0	0	0	0	0	0	0	0	0	0	0	0	0	0	0
HMF004227	HMF004227A	1084.09	3037.54	3354.36	0	0	0	0	2949.96	0	0	0	0	3703.21	0	0	0	777.779	1906.41	0	0	0	0	0	0	0	0	0	0	0	1588.59	0	0	0	0	0	1175.18	793.795	0	1587.09	0	0	0	0	0	0	0	0	0
HMF001841	HMF001841A	501.635	0	438.175	0	0	0	0	296.65	0	0	0	0	69.5036	0	0	0	60.438	243.263	0	0	0	0	0	0	0	0	0	0	0	470.409	0	0	0	0	0	87.635	223.117	0	212.54	0	0	0	0	0	0	0	0	0
HMF000025	HMF000025A	578.336	1620.24	714.062	0	0	0	0	1265.45	0	0	0	0	2104.26	0	0	0	1276.93	899.689	0	0	0	0	0	0	0	0	0	0	0	533.925	0	0	0	0	0	389.715	465.064	0	334.327	0	0	0	0	0	0	0	0	0
HMF001330	HMF001330A	360.164	2340.06	610.778	0	0	0	0	460.71	0	0	0	0	1315.1	0	0	0	130.559	464.711	0	0	0	0	0	0	0	0	0	0	0	611.278	0	0	0	0	0	193.588	474.716	0	733.334	0	0	0	0	0	0	0	0	0
HMF003319	HMF003319A	601.909	1465.34	770.104	0	0	0	0	0	0	0	0	0	816.021	0	0	0	221.598	467.652	0	0	0	0	0	0	0	0	0	0	0	717.699	0	0	0	0	0	263.023	403.269	0	981.72	0	0	0	0	0	0	0	0	0
HMF003568	HMF003568A	694.231	242.127	244.639	0	0	0	0	523.436	0	0	0	0	282.816	0	0	0	0	493.296	0	0	0	0	0	0	0	0	0	0	0	471.193	0	0	0	0	0	271.263	173.809	0	311.45	0	0	0	0	0	0	0	0	0
HMF003513	HMF003513A	658.425	3216.69	149.37	0	0	0	0	0	0	0	0	0	791.309	0	0	0	0	308.73	0	0	0	0	0	0	0	0	0	0	0	562.009	0	0	0	0	0	0	125.89	0	267.267	0	0	0	0	0	0	0	0	0
HMF003678	HMF003678A	725.714	1614.7	0	0	0	0	0	167.28	0	0	0	0	0	0	0	0	0	829.387	0	0	0	0	0	0	0	0	0	0	0	1125.88	0	0	0	0	0	495.829	135.727	0	218.365	0	0	0	0	0	0	0	0	0
HMF000737	HMF000737A	543.972	576.207	156.14	0	0	0	0	0	0	0	0	0	0	0	0	0	0	265.438	0	0	0	0	0	0	0	0	0	0	0	728.822	0	0	0	0	0	236.728	0	0	419.563	0	0	0	0	0	0	0	0	0
HMF001745	HMF001745A	0	316.95	5433.21	0	0	0	0	5122.77	0	0	0	0	810.651	0	0	0	526.247	670.452	0	0	0	0	0	0	0	0	0	0	0	550.782	0	0	0	0	0	1393.98	1137.11	0	2618.72	0	0	0	0	0	0	0	0	0
HMF002285	HMF002285A	848.402	343.676	745.048	0	0	0	0	892.553	0	0	0	0	301.531	0	0	0	141.484	2694.72	0	0	0	0	0	0	0	0	0	0	0	604.066	0	0	0	0	0	897.068	223.765	0	639.688	0	0	0	0	0	0	0	0	0
HMF001471	HMF001471A	555.086	4098.52	421.825	0	0	0	0	701.873	0	0	0	0	937.834	0	0	0	212.916	1137.22	0	0	0	0	0	0	0	0	0	0	0	1188.83	0	0	0	0	0	552.08	243.977	0	430.843	0	0	0	0	0	0	0	0	0
HMF001228	HMF001228A	489.917	2157.73	455.493	0	0	0	0	1403.4	0	0	0	0	4059.53	0	0	0	0	783.269	0	0	0	0	0	0	0	0	0	0	0	775.786	0	0	0	0	0	390.637	637.092	0	709.432	0	0	0	0	0	0	0	0	0
HMF001778	HMF001778A	327.035	752.381	2197.95	0	0	0	0	3971.06	0	0	0	0	1039.29	0	0	0	377.695	624.476	0	0	0	0	0	0	0	0	0	0	0	1482.19	0	0	0	0	0	703.727	411.301	0	754.889	0	0	0	0	0	0	0	0	0
HMF003796	HMF003796A	279.937	0	4798.84	0	0	0	0	6925.56	0	0	0	0	969.049	0	0	0	697.596	0	0	0	0	0	0	0	0	0	0	0	0	1884.71	0	0	0	0	0	1061.86	1581.32	0	821.846	0	0	0	0	0	0	0	0	0
HMF002470	HMF002470A	1521.99	885.321	1575.13	0	0	0	0	1725.52	0	0	0	0	2595.81	0	0	0	1748.08	1663.86	0	0	0	0	0	0	0	0	0	0	0	0	0	0	0	0	0	905.374	423.611	0	684.294	0	0	0	0	0	0	0	0	0
HMF003573	HMF003573A	617.742	585.387	1670.04	0	0	0	0	2245.48	0	0	0	0	638.151	0	0	0	4962.35	353.92	0	0	0	0	0	0	0	0	0	0	0	1781.55	0	0	0	0	0	606.294	877.085	0	1119	0	0	0	0	0	0	0	0	0
HMF000143	HMF000143A	505.491	99.9927	487.402	0	0	0	0	550.211	0	0	0	0	191.443	0	0	0	110.545	355.25	0	0	0	0	0	0	0	0	0	0	0	494.436	0	0	0	0	0	337.664	247.721	0	475.845	0	0	0	0	0	0	0	0	0
HMF002615	HMF002615A	4808.26	884.996	3313.11	0	0	0	0	1829.46	0	0	0	0	2118.29	0	0	0	1040.41	603.157	0	0	0	0	0	0	0	0	0	0	0	1612.08	0	0	0	0	0	17552	4939.69	0	2575.53	0	0	0	0	0	0	0	0	0
HMF000598	HMF000598A	600.456	806.112	425.323	0	0	0	0	1043.79	0	0	0	0	371.282	0	0	0	204.155	760.577	0	0	0	0	0	0	0	0	0	0	0	805.611	0	0	0	0	0	484.868	283.715	0	802.109	0	0	0	0	0	0	0	0	0
HMF002037	HMF002037A	450.197	407.369	670.315	0	0	0	0	559.26	0	0	0	0	281.373	0	0	0	83.6649	373.006	0	0	0	0	0	0	0	0	0	0	0	269.421	0	0	0	0	0	417.329	0	0	526.89	0	0	0	0	0	0	0	0	0
HMF002915	HMF002915A	1028.32	10360.2	391.431	0	0	0	0	0	0	0	0	0	2026.64	0	0	0	311.945	909.339	0	0	0	0	0	0	0	0	0	0	0	447.921	0	0	0	0	0	591.395	0	0	513.909	0	0	0	0	0	0	0	0	0
HMF004131	HMF004131A	1950.53	6118.11	1530.03	0	0	0	0	0	0	0	0	0	12764.2	0	0	0	0	3005.55	0	0	0	0	0	0	0	0	0	0	0	0	0	0	0	0	0	743.513	721.013	0	1363.52	0	0	0	0	0	0	0	0	0
HMF002761	HMF002761A	578.747	144.687	696.21	0	0	0	0	0	0	0	0	0	199.133	0	0	0	140.654	1034.48	0	0	0	0	0	0	0	0	0	0	0	378.605	0	0	0	0	0	485.986	485.482	0	834.343	0	0	0	0	0	0	0	0	0
HMF001794	HMF001794A	955.344	205.181	182.161	0	0	0	0	1439.27	0	0	0	0	176.156	0	0	0	99.588	1012.89	0	0	0	0	0	0	0	0	0	0	0	554.49	0	0	0	0	0	404.858	330.792	0	866.265	0	0	0	0	0	0	0	0	0
HMF001900	HMF001900A	843.38	447.436	1182.83	0	0	0	0	930.868	0	0	0	0	685.403	0	0	0	197.972	448.436	0	0	0	0	0	0	0	0	0	0	0	1146.84	0	0	0	0	0	229.967	405.442	0	519.426	0	0	0	0	0	0	0	0	0
HMF002822	HMF002822A	0	44349.9	0	0	0	0	0	0	0	0	0	0	42756.5	0	0	0	0	1507.82	0	0	0	0	0	0	0	0	0	0	0	0	0	0	0	0	0	0	0	0	0	0	0	0	0	0	0	0	0	0
HMF001628	HMF001628A	737.309	11791.9	561.616	0	0	0	0	0	0	0	0	0	21014.6	0	0	0	0	0	0	0	0	0	0	0	0	0	0	0	0	528.58	0	0	0	0	0	0	0	0	0	0	0	0	0	0	0	0	0	0
HMF002265	HMF002265A	827.912	218.4	252.039	0	0	0	0	425.252	0	0	0	0	286.681	0	0	0	74.3062	223.923	0	0	0	0	0	0	0	0	0	0	0	479.476	0	0	0	0	0	0	238.483	0	561.815	0	0	0	0	0	0	0	0	0
HMF002088	HMF002088A	790.413	259.636	1074.56	0	0	0	0	1180.62	0	0	0	0	379.698	0	0	0	191.1	1449.26	0	0	0	0	0	0	0	0	0	0	0	315.165	0	0	0	0	0	866.953	270.141	0	881.46	0	0	0	0	0	0	0	0	0
HMF004081	HMF004081A	963.91	12250.9	0	0	0	0	0	343.968	0	0	0	0	4935.54	0	0	0	0	708.434	0	0	0	0	0	0	0	0	0	0	0	707.934	0	0	0	0	0	0	346.468	0	818.423	0	0	0	0	0	0	0	0	0
HMF004287	HMF004287A	585.346	2178.29	0	0	0	0	0	228.635	0	0	0	0	1062.13	0	0	0	0	586.847	0	0	0	0	0	0	0	0	0	0	0	187.611	0	0	0	0	0	324.692	155.092	0	470.778	0	0	0	0	0	0	0	0	0
HMF003810	HMF003810A	534.141	1965.02	654.673	0	0	0	0	860.727	0	0	0	0	3139.83	0	0	0	0	470.624	0	0	0	0	0	0	0	0	0	0	0	851.224	0	0	0	0	0	0	401.606	0	322.085	0	0	0	0	0	0	0	0	0
HMF000045	HMF000045A	759.214	100.302	97.3224	0	0	0	0	150.949	0	0	0	0	0	0	0	0	0	188.19	0	0	0	0	0	0	0	0	0	0	0	695.657	0	0	0	0	0	196.631	134.067	0	351.552	0	0	0	0	0	0	0	0	0
HMF002841	HMF002841A	1302.61	497.689	1145.74	0	0	0	0	1718.11	0	0	0	0	474.634	0	0	0	161.386	1974.22	0	0	0	0	0	0	0	0	0	0	0	909.674	0	0	0	0	0	799.411	0	0	1111.66	0	0	0	0	0	0	0	0	0
HMF002225	HMF002225A	601.767	13413.8	320.376	0	0	0	0	662.243	0	0	0	0	4156.39	0	0	0	415.339	400.345	0	0	0	0	0	0	0	0	0	0	0	874.161	0	0	0	0	0	380.852	0	0	414.339	0	0	0	0	0	0	0	0	0
HMF003975	HMF003975A	2128.92	953.57	1258.27	0	0	0	0	2761.31	0	0	0	0	417.593	0	0	0	428.082	4586.52	0	0	0	0	0	0	0	0	0	0	0	1529.01	0	0	0	0	0	2166.89	0	0	1956.59	0	0	0	0	0	0	0	0	0
HMF001669	HMF001669A	1750.62	832.433	192.563	0	0	0	0	731.638	0	0	0	0	251.234	0	0	0	109.821	849.984	0	0	0	0	0	0	0	0	0	0	0	1114.26	0	0	0	0	0	469.873	159.967	0	723.615	0	0	0	0	0	0	0	0	0
HMF003935	HMF003935A	602.427	323.302	130.526	0	0	0	0	288.663	0	0	0	0	0	0	0	0	0	839.883	0	0	0	0	0	0	0	0	0	0	0	771.608	0	0	0	0	0	347.901	252.015	0	419.691	0	0	0	0	0	0	0	0	0
HMF001130	HMF001130A	866.12	8098.77	393.1	0	0	0	0	369.125	0	0	0	0	5821.08	0	0	0	0	516.475	0	0	0	0	0	0	0	0	0	0	0	554.436	0	0	0	0	0	0	280.215	0	536.954	0	0	0	0	0	0	0	0	0
HMF001092	HMF001092B	419.122	3042.76	6328.79	0	0	0	0	4448.99	0	0	0	0	6248.36	0	0	0	1288.34	1046.06	0	0	0	0	0	0	0	0	0	0	0	2707.06	0	0	0	0	0	1335.8	901.687	0	1610.05	0	0	0	0	0	0	0	0	0
HMF004174	HMF004174A	310.054	493.494	1808.48	0	0	0	0	2295.5	0	0	0	0	993.967	0	0	0	180.948	358.406	0	0	0	0	0	0	0	0	0	0	0	783.11	0	0	0	0	0	281.142	692.387	0	0	0	0	0	0	0	0	0	0	0
HMF003882	HMF003882A	478.631	0	170.478	0	0	0	0	205.766	0	0	0	0	0	0	0	0	0	254.475	0	0	0	0	0	0	0	0	0	0	0	337.477	0	0	0	0	0	206.761	170.478	0	312.129	0	0	0	0	0	0	0	0	0
HMF001352	HMF001352A	420.357	129.919	840.713	0	0	0	0	0	0	0	0	0	479.046	0	0	0	84.7736	584.888	0	0	0	0	0	0	0	0	0	0	0	441.425	0	0	0	0	0	420.858	218.204	0	872.817	0	0	0	0	0	0	0	0	0
HMF003808	HMF003808A	430.439	1301.34	0	0	0	0	0	293.641	0	0	0	0	164.359	0	0	0	0	195.928	0	0	0	0	0	0	0	0	0	0	0	520.636	0	0	0	0	0	135.796	83.6826	0	229	0	0	0	0	0	0	0	0	0
HMF001334	HMF001334A	721.891	472.756	2553.38	0	0	0	0	2227.71	0	0	0	0	1059.07	0	0	0	789.928	663.359	0	0	0	0	0	0	0	0	0	0	0	1789.97	0	0	0	0	0	752.407	436.736	0	542.794	0	0	0	0	0	0	0	0	0
HMF001880	HMF001880A	6367.78	684.228	0	0	0	0	0	1545.15	0	0	0	0	435.464	0	0	0	2415.07	0	0	0	0	0	0	0	0	0	0	0	0	0	0	0	0	0	0	15657.2	2960.65	0	2477.14	0	0	0	0	0	0	0	0	0
HMF000411	HMF000411A	741.452	4425.65	1420.74	0	0	0	0	3198.92	0	0	0	0	5742.12	0	0	0	683.8	822.666	0	0	0	0	0	0	0	0	0	0	0	1317.47	0	0	0	0	0	540.423	464.723	0	0	0	0	0	0	0	0	0	0	0
HMF001423	HMF001423A	290.17	0	6396.78	0	0	0	0	6726.54	0	0	0	0	1239.36	0	0	0	611.914	1077.99	0	0	0	0	0	0	0	0	0	0	0	1396.73	0	0	0	0	0	1591.18	1075.48	0	0	0	0	0	0	0	0	0	0	0
HMF002765	HMF002765A	0	1282.47	2346.36	0	0	0	0	5282.06	0	0	0	0	1636.77	0	0	0	554.405	1091.84	0	0	0	0	0	0	0	0	0	0	0	1823.4	0	0	0	0	0	1103.32	607.799	0	876.269	0	0	0	0	0	0	0	0	0
HMF002350	HMF002350A	0	1908.55	3060.67	0	0	0	0	6018.05	0	0	0	0	3259.26	0	0	0	451.566	1449	0	0	0	0	0	0	0	0	0	0	0	2311.22	0	0	0	0	0	1281.85	1157.11	0	1481.93	0	0	0	0	0	0	0	0	0
HMF000323	HMF000323A	1233.62	4374.47	1080.98	0	0	0	0	539.49	0	0	0	0	6985.84	0	0	0	0	2168.97	0	0	0	0	0	0	0	0	0	0	0	0	0	0	0	0	0	975.385	571.519	0	1338.21	0	0	0	0	0	0	0	0	0
HMF000372	HMF000372A	0	39843.6	1307.92	0	0	0	0	2015.88	0	0	0	0	19336.8	0	0	0	0	1383.42	0	0	0	0	0	0	0	0	0	0	0	0	0	0	0	0	0	0	0	0	0	0	0	0	0	0	0	0	0	0
HMF000579	HMF000579A	3141.52	35041.7	4000.52	0	0	0	0	1729.01	0	0	0	0	31726.2	0	0	0	4810.53	0	0	0	0	0	0	0	0	0	0	0	0	1470.51	0	0	0	0	0	0	2219.51	0	1306.51	0	0	0	0	0	0	0	0	0
HMF000693	HMF000693A	0	1237.88	690.654	0	0	0	0	3351.82	0	0	0	0	698.15	0	0	0	15303.3	0	0	0	0	0	0	0	0	0	0	0	0	381.808	0	0	0	0	0	0	1172.91	0	0	0	0	0	0	0	0	0	0	0
HMF000984	HMF000984A	0	16901.4	0	0	0	0	0	916.709	0	0	0	0	21310.4	0	0	0	0	2393.05	0	0	0	0	0	0	0	0	0	0	0	0	0	0	0	0	0	0	0	0	0	0	0	0	0	0	0	0	0	0
HMF001698	HMF001698B	0	81875.8	0	0	0	0	0	0	0	0	0	0	29123.6	0	0	0	0	0	0	0	0	0	0	0	0	0	0	0	0	0	0	0	0	0	0	0	0	0	0	0	0	0	0	0	0	0	0	0
HMF001461	HMF001461A	835.232	31485.8	1105.31	0	0	0	0	953.765	0	0	0	0	23389	0	0	0	0	1287.86	0	0	0	0	0	0	0	0	0	0	0	0	0	0	0	0	0	0	0	0	0	0	0	0	0	0	0	0	0	0
HMF003025	HMF003025B	647.625	9357.52	1739.18	0	0	0	0	591.57	0	0	0	0	9071.25	0	0	0	1625.57	2054.98	0	0	0	0	0	0	0	0	0	0	0	0	0	0	0	0	0	725.199	471.955	0	1195.15	0	0	0	0	0	0	0	0	0
HMF001945	HMF001945A	752.913	277.968	5149.41	0	0	0	0	2912.66	0	0	0	0	815.906	0	0	0	800.908	0	0	0	0	0	0	0	0	0	0	0	0	874.399	0	0	0	0	0	1244.36	1226.36	0	3047.15	0	0	0	0	0	0	0	0	0
HMF002241	HMF002241A	567.731	1416.33	272.89	0	0	0	0	425.548	0	0	0	0	807.694	0	0	0	0	2682.5	0	0	0	0	0	0	0	0	0	0	0	457.976	0	0	0	0	0	735.356	272.391	0	345.228	0	0	0	0	0	0	0	0	0
HMF000054	HMF000054A	1000.64	506.817	4850.25	0	0	0	0	4813.77	0	0	0	0	1005.64	0	0	0	916.17	1077.11	0	0	0	0	0	0	0	0	0	0	0	1925.31	0	0	0	0	0	1316.03	1580.93	0	1832.34	0	0	0	0	0	0	0	0	0
HMF001223	HMF001223A	1055.16	23983.7	2142.83	0	0	0	0	3545.05	0	0	0	0	29384.1	0	0	0	0	2516.39	0	0	0	0	0	0	0	0	0	0	0	1236.19	0	0	0	0	0	995.155	0	0	1903.8	0	0	0	0	0	0	0	0	0
HMF002824	HMF002824A	1663.39	411.348	5151.1	0	0	0	0	3061.37	0	0	0	0	1276.03	0	0	0	4604.3	0	0	0	0	0	0	0	0	0	0	0	0	1629.4	0	0	0	0	0	0	2247.17	0	1270.53	0	0	0	0	0	0	0	0	0
HMF001223	HMF001223B	1216.45	25114.8	2455.37	0	0	0	0	3464	0	0	0	0	30622	0	0	0	0	2919.97	0	0	0	0	0	0	0	0	0	0	0	1418.27	0	0	0	0	0	1078.07	0	0	1839.41	0	0	0	0	0	0	0	0	0
HMF001924	HMF001924B	821.885	11303.3	0	0	0	0	0	1174.05	0	0	0	0	12372.3	0	0	0	400.688	1046.49	0	0	0	0	0	0	0	0	0	0	0	878.912	0	0	0	0	0	0	0	0	0	0	0	0	0	0	0	0	0	0
HMF002027	HMF002027A	11292.5	0	0	0	0	0	0	0	0	0	0	0	0	0	0	0	1244	2542	0	0	0	0	0	0	0	0	0	0	0	0	0	0	0	0	0	0	0	0	0	1046	0	0	0	0	0	0	0	0
HMF001965	HMF001965A	2564.79	0	0	921.21	0	0	0	0	0	0	0	0	0	0	0	0	16135.3	2730.41	0	0	0	0	0	0	0	0	0	0	0	0	0	0	0	0	0	1031.96	0	0	0	4440.43	0	0	0	0	0	0	0	0
HMF000957	HMF000957A	5958.82	0	0	1562.56	0	0	0	0	0	0	0	0	0	0	0	0	2243.37	1767.5	0	0	0	0	0	0	0	0	0	0	0	0	0	0	0	0	0	0	0	0	0	830.266	0	0	0	0	0	0	0	0
HMF002994	HMF002994A	6790.54	0	0	0	0	0	0	0	0	0	0	0	0	0	0	0	3550.91	863.967	0	0	0	0	0	0	0	0	0	0	0	0	0	0	0	0	0	0	0	0	0	885.088	0	0	0	0	0	0	0	0
HMF002776	HMF002776A	3219.68	0	0	2961.03	0	0	0	0	0	0	0	0	0	0	0	0	4263.29	2689.4	0	0	0	0	0	0	0	0	0	0	0	0	0	0	0	0	0	2668.92	0	0	0	5086.68	0	0	0	0	0	0	0	0
HMF002800	HMF002800A	4429.98	0	0	1227.41	0	0	0	0	0	0	0	0	0	0	0	0	2544.35	3365.13	0	0	0	0	0	0	0	0	0	0	0	0	0	0	0	0	0	450.151	0	0	0	7161.9	0	0	0	0	0	0	0	0
HMF002273	HMF002273A	4605.45	0	0	0	0	0	0	0	0	0	0	0	0	0	0	0	999.025	1109.86	0	0	0	0	0	0	0	0	0	0	0	0	0	0	0	0	0	461.397	0	0	0	3362.68	0	0	0	0	0	0	0	0
HMF000882	HMF000882A	6325.98	0	0	0	0	0	0	0	0	0	0	0	0	0	0	0	2442.88	3465.54	0	0	0	0	0	0	0	0	0	0	0	0	0	0	0	0	0	1495.23	0	0	0	5302.32	0	0	0	0	0	0	0	0
HMF003298	HMF003298A	3982.86	0	0	1957.91	0	0	0	0	0	0	0	0	0	0	0	0	2731.77	3159.47	0	0	0	0	0	0	0	0	0	0	0	0	0	0	0	0	0	903.421	0	0	0	8296.37	0	0	0	0	0	0	0	0
HMF001060	HMF001060A	5041.81	0	0	768.81	0	0	0	0	0	0	0	0	0	0	0	0	588.12	423.947	0	0	0	0	0	0	0	0	0	0	0	0	0	0	0	0	0	379.4	0	0	0	3232.91	0	0	0	0	0	0	0	0
HMF000272	HMF000272A	0	0	0	2710.75	0	0	0	0	0	0	0	0	0	0	0	0	5680.26	3127.17	0	0	0	0	0	0	0	0	0	0	0	0	0	0	0	0	0	3529.08	0	0	0	9155.29	0	0	0	0	0	0	0	0
HMF001438	HMF001438A	3146.53	0	0	473.66	0	0	0	0	0	0	0	0	0	0	0	0	135.475	2875.58	0	0	0	0	0	0	0	0	0	0	0	0	0	0	0	0	0	251.381	0	0	0	392.375	0	0	0	0	0	0	0	0
HMF002107	HMF002107B	3029.11	0	0	1509.56	0	0	0	0	0	0	0	0	0	0	0	0	3491.36	2819.45	0	0	0	0	0	0	0	0	0	0	0	0	0	0	0	0	0	2467.52	0	0	0	7970.63	0	0	0	0	0	0	0	0
HMF003717	HMF003717A	4619.18	0	0	1304.15	0	0	0	0	0	0	0	0	0	0	0	0	4179.97	1006.69	0	0	0	0	0	0	0	0	0	0	0	0	0	0	0	0	0	2009.88	0	0	0	7413.14	0	0	0	0	0	0	0	0
HMF002369	HMF002369A	1306.33	0	0	1509.72	0	0	0	0	0	0	0	0	0	0	0	0	5985.91	0	0	0	0	0	0	0	0	0	0	0	0	0	0	0	0	0	0	3712.59	0	0	0	19791.8	0	0	0	0	0	0	0	0
HMF002302	HMF002302A	6021.43	0	0	1226.75	0	0	0	0	0	0	0	0	0	0	0	0	2590.35	1022.2	0	0	0	0	0	0	0	0	0	0	0	0	0	0	0	0	0	1135.5	0	0	0	1608.76	0	0	0	0	0	0	0	0
HMF001840	HMF001840A	1270.38	0	0	1915.07	0	0	0	0	0	0	0	0	0	0	0	0	13161.9	3397	0	0	0	0	0	0	0	0	0	0	0	0	0	0	0	0	0	1348.4	0	0	0	898.266	0	0	0	0	0	0	0	0
HMF001838	HMF001838A	9165.64	0	0	5283.66	0	0	0	0	0	0	0	0	0	0	0	0	7876.98	4198.02	0	0	0	0	0	0	0	0	0	0	0	0	0	0	0	0	0	2658.83	0	0	0	6748.34	0	0	0	0	0	0	0	0
HMF002627	HMF002627A	1300.5	0	0	927.641	0	0	0	0	0	0	0	0	0	0	0	0	0	8511.64	0	0	0	0	0	0	0	0	0	0	0	0	0	0	0	0	0	450.54	0	0	0	0	0	0	0	0	0	0	0	0
HMF001704	HMF001704A	8980.7	0	0	0	0	0	0	0	0	0	0	0	0	0	0	0	1337.04	1550.92	0	0	0	0	0	0	0	0	0	0	0	0	0	0	0	0	0	0	0	0	0	1663.39	0	0	0	0	0	0	0	0
HMF000814	HMF000814A	2336.93	0	0	1371.69	0	0	0	0	0	0	0	0	0	0	0	0	8003.1	3068.13	0	0	0	0	0	0	0	0	0	0	0	0	0	0	0	0	0	444.032	0	0	0	1776.13	0	0	0	0	0	0	0	0
HMF000020	HMF000020B	3491.56	0	0	1676.49	0	0	0	0	0	0	0	0	0	0	0	0	5622.32	9400.56	0	0	0	0	0	0	0	0	0	0	0	0	0	0	0	0	0	1564.42	0	0	0	8699.64	0	0	0	0	0	0	0	0
HMF000349	HMF000349A	5983.74	0	0	0	0	0	0	0	0	0	0	0	0	0	0	0	0	3499.63	0	0	0	0	0	0	0	0	0	0	0	0	0	0	0	0	0	579.942	0	0	0	1505.05	0	0	0	0	0	0	0	0
HMF001287	HMF001287A	5855.3	0	0	547.136	0	0	0	0	0	0	0	0	0	0	0	0	221.257	1086.76	0	0	0	0	0	0	0	0	0	0	0	0	0	0	0	0	0	0	0	0	0	1199.89	0	0	0	0	0	0	0	0
HMF001658	HMF001658A	3830.55	0	0	891.023	0	0	0	0	0	0	0	0	0	0	0	0	305.522	6301.27	0	0	0	0	0	0	0	0	0	0	0	0	0	0	0	0	0	1068.83	0	0	0	1270.67	0	0	0	0	0	0	0	0
HMF003234	HMF003234A	4099.85	0	0	579.468	0	0	0	0	0	0	0	0	0	0	0	0	2077.47	1670.79	0	0	0	0	0	0	0	0	0	0	0	0	0	0	0	0	0	911.523	0	0	0	7114.89	0	0	0	0	0	0	0	0
HMF001303	HMF001303A	3616.01	0	0	0	0	0	0	0	0	0	0	0	0	0	0	0	977.842	1777.17	0	0	0	0	0	0	0	0	0	0	0	0	0	0	0	0	0	503.965	0	0	0	4653.53	0	0	0	0	0	0	0	0
HMF001927	HMF001927A	5243.26	0	0	1415.06	0	0	0	0	0	582.641	0	0	0	0	0	0	3772.65	3653.52	0	0	0	0	0	0	0	0	0	0	0	0	0	0	0	0	0	1869.05	0	0	0	6765.44	0	0	0	0	0	0	0	0
HMF000167	HMF000167A	3413.14	0	0	0	0	0	0	0	0	0	0	0	0	0	0	0	22176.4	1229.83	0	0	0	0	0	0	0	0	0	0	0	0	0	0	0	0	0	894.014	0	0	0	0	0	0	0	0	0	0	0	0
HMF003543	HMF003543A	7148.11	0	0	841.101	0	0	0	0	0	0	0	0	0	0	0	0	2209.58	1368.48	0	0	0	0	0	0	0	0	0	0	0	0	0	0	0	0	0	0	0	0	0	1851.82	0	0	0	0	0	0	0	0
HMF003777	HMF003777A	2508.12	0	0	0	0	0	0	0	0	0	0	0	0	0	0	0	6601.94	2171.97	0	0	0	0	0	0	0	0	0	0	0	0	0	0	0	0	0	1154.01	0	0	0	3161.91	0	0	0	0	0	0	0	0
HMF002620	HMF002620A	5642.59	0	0	811.608	0	0	0	0	0	0	0	0	0	0	0	0	589.622	2218.36	0	0	0	0	0	0	0	0	0	0	0	0	0	0	0	0	0	499.22	0	0	0	1034.6	0	0	0	0	0	0	0	0
HMF002811	HMF002811A	5620.47	0	0	1504.92	0	0	0	0	0	0	0	0	0	0	0	0	2827.48	1251.6	0	0	0	0	0	0	0	0	0	0	0	0	0	0	0	0	0	1196.14	0	0	0	2959.38	0	0	0	0	0	0	0	0
HMF001583	HMF001583A	5373.61	0	0	528.806	0	0	0	0	0	0	0	0	0	0	0	0	1384.3	1869.58	0	0	0	0	0	0	0	0	0	0	0	0	0	0	0	0	0	0	0	0	0	913.029	0	0	0	0	0	0	0	0
HMF002865	HMF002865A	6756.75	0	0	263.975	0	0	0	0	0	0	0	0	0	0	0	0	950.309	723.039	0	0	0	0	0	0	0	0	0	0	0	0	0	0	0	0	0	446.997	0	0	0	1688.43	0	0	0	0	0	0	0	0
HMF003669	HMF003669A	2574.43	0	0	439.073	0	0	0	0	0	0	0	0	0	0	0	0	18129	1979.83	0	0	0	0	0	0	0	0	0	0	0	0	0	0	0	0	0	515.086	0	0	0	0	0	0	0	0	0	0	0	0
HMF000606	HMF000606A	4585.26	0	0	0	0	0	0	0	0	0	0	0	0	0	0	0	149.737	1521.41	0	0	0	0	0	0	0	0	0	0	0	0	0	0	0	0	0	241.382	0	0	0	883.899	0	0	0	0	0	0	0	0
HMF003653	HMF003653A	7274.36	0	0	0	0	0	0	0	0	0	0	0	0	0	0	0	588.069	1346.66	0	0	0	0	0	0	0	0	0	0	0	0	0	0	0	0	0	0	0	0	0	3004.35	0	0	0	0	0	0	0	0
HMF003137	HMF003137A	5247.85	0	0	532.848	0	0	0	0	0	0	0	0	0	0	0	0	163.76	364.58	0	0	0	0	0	0	0	0	0	0	0	0	0	0	0	0	0	232.37	0	0	0	1196.9	0	0	0	0	0	0	0	0
HMF002144	HMF002144A	34093.7	0	0	4675.28	0	0	0	0	0	1601.75	0	0	0	0	0	0	2570.1	4125.86	0	0	0	0	0	0	0	0	0	0	0	0	0	0	0	0	0	50265.2	0	0	0	3029.03	0	0	0	0	0	0	0	0
HMF003067	HMF003067A	8735.31	0	0	1295.29	0	0	0	0	0	519.513	0	0	0	0	0	0	4335.43	998.564	0	0	0	0	0	0	0	0	0	0	0	0	0	0	0	0	0	993.568	0	0	0	4450.33	0	0	0	0	0	0	0	0
HMF000008	HMF000008B	5536.94	0	0	0	0	0	0	0	0	0	0	0	0	0	0	0	6342.7	3007.25	0	0	0	0	0	0	0	0	0	0	0	0	0	0	0	0	0	659.897	0	0	0	0	0	0	0	0	0	0	0	0
HMF003786	HMF003786A	2302.75	0	0	1307.79	0	0	0	0	0	0	0	0	0	0	0	0	5763.88	2173.32	0	0	0	0	0	0	0	0	0	0	0	0	0	0	0	0	0	940.991	0	0	0	2200.31	0	0	0	0	0	0	0	0
HMF003334	HMF003334A	7544.11	0	0	0	0	0	0	0	0	0	0	0	0	0	0	0	321.947	615.22	0	0	0	0	0	0	0	0	0	0	0	0	0	0	0	0	0	0	0	0	0	426.076	0	0	0	0	0	0	0	0
HMF003169	HMF003169A	5218.29	0	0	0	0	0	0	0	0	0	0	0	0	0	0	0	338.954	1277.33	0	0	0	0	0	0	0	0	0	0	0	0	0	0	0	0	0	0	0	0	0	500.432	0	0	0	0	0	0	0	0
HMF003048	HMF003048A	6366.19	0	0	2352.54	0	0	0	0	0	0	0	0	0	0	0	0	2792.26	1877.22	0	0	0	0	0	0	0	0	0	0	0	0	0	0	0	0	0	0	0	0	0	3423.01	0	0	0	0	0	0	0	0
HMF002128	HMF002128A	3488.26	0	0	927.537	0	0	0	0	0	0	0	0	0	0	0	0	4529.24	1943.03	0	0	0	0	0	0	0	0	0	0	0	0	0	0	0	0	0	1316.84	0	0	0	8818.1	0	0	0	0	0	0	0	0
HMF002246	HMF002246A	3446.87	0	0	0	0	0	0	0	0	0	0	0	0	0	0	0	0	0	0	0	0	0	0	0	0	0	0	0	0	0	0	0	0	0	0	372.134	0	0	0	11690.4	0	0	0	0	0	0	0	0
HMF001548	HMF001548A	4304.17	0	0	311.308	0	0	0	0	0	0	0	0	0	0	0	0	341.386	3970.8	0	0	0	0	0	0	0	0	0	0	0	0	0	0	0	0	0	921.892	0	0	0	1871.86	0	0	0	0	0	0	0	0
HMF001724	HMF001724A	4566.13	0	0	1082.24	0	0	0	0	0	0	0	0	0	0	0	0	9180.8	618.925	0	0	0	0	0	0	0	0	0	0	0	0	0	0	0	0	0	567.389	0	0	0	5123.51	0	0	0	0	0	0	0	0
HMF002787	HMF002787A	8112.04	0	0	2194.24	0	0	0	0	0	0	0	0	0	0	0	0	2362.61	1854.01	0	0	0	0	0	0	0	0	0	0	0	0	0	0	0	0	0	0	0	0	0	2418.23	0	0	0	0	0	0	0	0
HMF000756	HMF000756A	6546.92	0	0	1023.94	0	0	0	0	0	370.891	0	0	0	0	0	0	1400.81	924.735	0	0	0	0	0	0	0	0	0	0	0	0	0	0	0	0	0	821.045	0	0	0	8473.66	0	0	0	0	0	0	0	0
HMF001856	HMF001856A	10128.9	0	0	1653.11	0	0	0	0	0	0	0	0	0	0	0	0	2141.74	1910.44	0	0	0	0	0	0	0	0	0	0	0	0	0	0	0	0	0	1407.3	0	0	0	3219.61	0	0	0	0	0	0	0	0
HMF002716	HMF002716A	748.544	0	0	3715.68	0	0	0	0	0	0	0	0	0	0	0	0	0	2646.19	0	0	0	0	0	0	0	0	0	0	0	0	0	0	0	0	0	1334.36	0	0	0	5100.11	0	0	0	0	0	0	0	0
HMF001297	HMF001297A	4287.99	0	0	687.438	0	0	0	0	0	0	0	0	0	0	0	0	4538.29	1068.13	0	0	0	0	0	0	0	0	0	0	0	0	0	0	0	0	0	946.725	0	0	0	0	0	0	0	0	0	0	0	0
HMF002492	HMF002492A	3501.79	0	0	1096.34	0	0	0	0	0	0	0	0	0	0	0	0	6058.92	1967.91	0	0	0	0	0	0	0	0	0	0	0	0	0	0	0	0	0	1995.44	0	0	0	4967.59	0	0	0	0	0	0	0	0
HMF001832	HMF001832B	3352.73	0	0	2124.22	0	0	0	0	0	0	0	0	0	0	0	0	12109.7	2561.29	0	0	0	0	0	0	0	0	0	0	0	0	0	0	0	0	0	1254.58	0	0	0	4497.05	0	0	0	0	0	0	0	0
HMF001951	HMF001951A	7214.7	0	0	609.172	0	0	0	0	0	0	0	0	0	0	0	0	4886.36	2502.6	0	0	0	0	0	0	0	0	0	0	0	0	0	0	0	0	0	839.859	0	0	0	5808.61	0	0	0	0	0	0	0	0
HMF003805	HMF003805A	6037.49	0	0	1141.17	0	0	0	0	0	0	0	0	0	0	0	0	547.72	3064.72	0	0	0	0	0	0	0	0	0	0	0	0	0	0	0	0	0	0	0	0	0	2328.06	0	0	0	0	0	0	0	0
HMF003289	HMF003289A	6379.22	0	0	1817.7	0	0	0	0	0	0	0	0	0	0	0	0	3652.92	5772.49	0	0	0	0	0	0	0	0	0	0	0	0	0	0	0	0	0	1297.07	0	0	0	4203.59	0	0	0	0	0	0	0	0
HMF003177	HMF003177A	5331.49	0	0	0	0	0	0	0	0	0	0	0	0	0	0	0	438.899	639.037	0	0	0	0	0	0	0	0	0	0	0	0	0	0	0	0	0	292.432	0	0	0	0	0	0	0	0	0	0	0	0
HMF000231	HMF000231A	7391.13	0	0	420.139	0	0	0	0	0	0	0	0	0	0	0	0	433.205	3360.11	0	0	0	0	0	0	0	0	0	0	0	0	0	0	0	0	0	0	0	0	0	1260.92	0	0	0	0	0	0	0	0
HMF003365	HMF003365A	4606.08	0	0	0	0	0	0	0	0	0	0	0	0	0	0	0	0	0	0	0	0	0	0	0	0	0	0	0	0	0	0	0	0	0	0	355.625	0	0	0	1471.66	0	0	0	0	0	0	0	0
HMF002606	HMF002606A	4549.44	0	0	2976.43	0	0	0	0	0	0	0	0	0	0	0	0	1302.34	7743.01	0	0	0	0	0	0	0	0	0	0	0	0	0	0	0	0	0	834.04	0	0	0	1624.05	0	0	0	0	0	0	0	0
HMF002555	HMF002555A	4926.64	0	0	0	0	0	0	0	0	0	0	0	0	0	0	0	790.906	650.745	0	0	0	0	0	0	0	0	0	0	0	0	0	0	0	0	0	0	0	0	0	2128.44	0	0	0	0	0	0	0	0
HMF001871	HMF001871A	1805.56	0	0	2177.6	0	0	0	0	0	0	0	0	0	0	0	0	15688.4	3914.96	0	0	0	0	0	0	0	0	0	0	0	0	0	0	0	0	0	3282.19	0	0	0	5008.02	0	0	0	0	0	0	0	0
HMF000355	HMF000355A	9279.76	0	0	614.046	0	0	0	0	0	823.733	0	0	0	0	0	0	1198.57	3910.98	0	0	0	0	0	0	0	0	0	0	0	0	0	0	0	0	0	1140.51	0	0	0	451.402	0	0	0	0	0	0	0	0
HMF001142	HMF001142A	6385.11	0	0	254.721	0	0	0	0	0	0	0	0	0	0	0	0	2344.24	1223.37	0	0	0	0	0	0	0	0	0	0	0	0	0	0	0	0	0	0	0	0	0	1676.04	0	0	0	0	0	0	0	0
HMF002777	HMF002777A	5195.05	0	0	0	0	0	0	0	0	0	0	0	0	0	0	0	282.639	525.258	0	0	0	0	0	0	0	0	0	0	0	0	0	0	0	0	0	404.198	0	0	0	590.289	0	0	0	0	0	0	0	0
HMF001107	HMF001107B	52628.4	0	0	5538.43	0	0	0	0	0	7591.15	0	0	0	0	0	0	0	7676.68	0	0	0	0	0	0	0	0	0	0	0	0	0	0	0	0	0	66295.7	0	0	0	6399.74	0	0	0	0	0	0	0	0
HMF002612	HMF002612A	3839.47	0	0	4908.44	0	0	0	0	0	0	0	0	0	0	0	0	10796.3	2997.21	0	0	0	0	0	0	0	0	0	0	0	0	0	0	0	0	0	1631.98	0	0	0	9564.65	0	0	0	0	0	0	0	0
HMF003627	HMF003627A	2550.8	0	0	1795.75	0	0	0	0	0	0	0	0	0	0	0	0	8519.91	4717.05	0	0	0	0	0	0	0	0	0	0	0	0	0	0	0	0	0	1449.35	0	0	0	4737.13	0	0	0	0	0	0	0	0
HMF002194	HMF002194A	4426.4	0	0	512.588	0	0	0	0	0	0	0	0	0	0	0	0	3007.38	2298.38	0	0	0	0	0	0	0	0	0	0	0	0	0	0	0	0	0	2047.85	0	0	0	1868.47	0	0	0	0	0	0	0	0
HMF003204	HMF003204A	6955.3	0	0	0	0	0	0	0	0	285.559	0	0	0	0	0	0	4419.4	0	0	0	0	0	0	0	0	0	0	0	0	0	0	0	0	0	0	1699.3	0	0	0	0	0	0	0	0	0	0	0	0
HMF001444	HMF001444A	5163.09	0	0	1875.26	0	0	0	0	0	0	0	0	0	0	0	0	5558.75	3533.93	0	0	0	0	0	0	0	0	0	0	0	0	0	0	0	0	0	1131.96	0	0	0	9397.81	0	0	0	0	0	0	0	0
HMF002429	HMF002429A	6992.16	0	0	1952.32	0	0	0	0	0	0	0	0	0	0	0	0	9437.57	4853.81	0	0	0	0	0	0	0	0	0	0	0	0	0	0	0	0	0	853.142	0	0	0	0	0	0	0	0	0	0	0	0
HMF002679	HMF002679A	5740.55	0	0	2013.5	0	0	0	0	0	0	0	0	0	0	0	0	2600.87	0	0	0	0	0	0	0	0	0	0	0	0	0	0	0	0	0	0	1547.8	0	0	0	8044.98	0	0	0	0	0	0	0	0
HMF000037	HMF000037A	3566.72	0	0	1173.19	0	0	0	0	0	0	0	0	0	0	0	0	6407.36	2425.65	0	0	0	0	0	0	0	0	0	0	0	0	0	0	0	0	0	1185.73	0	0	0	1639.85	0	0	0	0	0	0	0	0
HMF000852	HMF000852A	3757.65	0	0	392.852	0	0	0	0	0	0	0	0	0	0	0	0	1016.7	923.001	0	0	0	0	0	0	0	0	0	0	0	0	0	0	0	0	0	303.157	0	0	0	2171.71	0	0	0	0	0	0	0	0
HMF002281	HMF002281A	5366.91	0	0	2409.32	0	0	0	0	0	0	0	0	0	0	0	0	899.312	1977.89	0	0	0	0	0	0	0	0	0	0	0	0	0	0	0	0	0	1424.12	0	0	0	8353.46	0	0	0	0	0	0	0	0
HMF002532	HMF002532A	2012.88	0	0	987.912	0	0	0	0	0	0	0	0	0	0	0	0	27623	0	0	0	0	0	0	0	0	0	0	0	0	0	0	0	0	0	0	1060.52	0	0	0	1612.3	0	0	0	0	0	0	0	0
HMF000753	HMF000753A	8220.07	0	0	0	0	0	0	0	0	0	0	0	0	0	0	0	2520.4	2022.12	0	0	0	0	0	0	0	0	0	0	0	0	0	0	0	0	0	344.692	0	0	0	3884.16	0	0	0	0	0	0	0	0
HMF000760	HMF000760A	9271.18	0	0	0	0	0	0	0	0	0	0	0	0	0	0	0	2329.07	4924.84	0	0	0	0	0	0	0	0	0	0	0	0	0	0	0	0	0	0	0	0	0	3021.38	0	0	0	0	0	0	0	0
HMF000036	HMF000036A	6498.58	0	0	516.864	0	0	0	0	0	0	0	0	0	0	0	0	1918.85	3554.5	0	0	0	0	0	0	0	0	0	0	0	0	0	0	0	0	0	439.31	0	0	0	3983.81	0	0	0	0	0	0	0	0
HMF000869	HMF000869A	6202.11	0	0	0	0	0	0	0	0	0	0	0	0	0	0	0	4790.19	1498.56	0	0	0	0	0	0	0	0	0	0	0	0	0	0	0	0	0	1259.15	0	0	0	2317.97	0	0	0	0	0	0	0	0
HMF001022	HMF001022A	6729.19	0	0	0	0	0	0	0	0	0	0	0	0	0	0	0	1044.38	2204.36	0	0	0	0	0	0	0	0	0	0	0	0	0	0	0	0	0	424.031	0	0	0	1428.55	0	0	0	0	0	0	0	0
HMF000011	HMF000011A	9827.54	0	0	0	0	0	0	0	0	0	0	0	0	0	0	0	301.231	1803.38	0	0	0	0	0	0	0	0	0	0	0	0	0	0	0	0	0	0	0	0	0	1389.07	0	0	0	0	0	0	0	0
HMF000166	HMF000166A	7360.07	0	0	475.937	0	0	0	0	0	0	0	0	0	0	0	0	3061.17	1796.49	0	0	0	0	0	0	0	0	0	0	0	0	0	0	0	0	0	380.151	0	0	0	3723.19	0	0	0	0	0	0	0	0
HMF001205	HMF001205A	5170.59	0	0	1015.26	0	0	0	0	0	0	0	0	0	0	0	0	214.689	2341.51	0	0	0	0	0	0	0	0	0	0	0	0	0	0	0	0	0	285.416	0	0	0	391.255	0	0	0	0	0	0	0	0
HMF000207	HMF000207A	9170.41	0	0	1113.72	0	0	0	0	0	0	0	0	0	0	0	0	2859.84	1065.69	0	0	0	0	0	0	0	0	0	0	0	0	0	0	0	0	0	0	0	0	0	2474.09	0	0	0	0	0	0	0	0
HMF001869	HMF001869A	7208.84	0	0	409.748	0	0	0	0	0	224.506	0	0	0	0	0	0	1059.1	0	0	0	0	0	0	0	0	0	0	0	0	0	0	0	0	0	0	434.413	0	0	0	1250.39	0	0	0	0	0	0	0	0
HMF000348	HMF000348A	4696.74	0	0	1395.86	0	0	0	0	0	0	0	0	0	0	0	0	19736.2	1650.69	0	0	0	0	0	0	0	0	0	0	0	0	0	0	0	0	0	681.406	0	0	0	12110.1	0	0	0	0	0	0	0	0
HMF001026	HMF001026A	3047.61	0	0	1332.01	0	0	0	0	0	0	0	0	0	0	0	0	14881	2628.98	0	0	0	0	0	0	0	0	0	0	0	0	0	0	0	0	0	1191.3	0	0	0	5024.1	0	0	0	0	0	0	0	0
HMF001653	HMF001653A	6833.11	0	0	0	0	0	0	0	0	0	0	0	0	0	0	0	870.042	0	0	0	0	0	0	0	0	0	0	0	0	0	0	0	0	0	0	0	0	0	0	607.076	0	0	0	0	0	0	0	0
HMF000853	HMF000853A	7027.01	0	0	1127.72	0	0	0	0	0	714.188	0	0	0	0	0	0	456.481	0	0	0	0	0	0	0	0	0	0	0	0	0	0	0	0	0	0	1991.73	0	0	0	2045.17	0	0	0	0	0	0	0	0
HMF002005	HMF002005A	6323.75	0	0	0	0	0	0	0	0	0	0	0	0	0	0	0	1502.46	2337.55	0	0	0	0	0	0	0	0	0	0	0	0	0	0	0	0	0	944.232	0	0	0	3303.31	0	0	0	0	0	0	0	0
HMF003188	HMF003188A	7453.43	0	0	550.628	0	0	0	0	0	0	0	0	0	0	0	0	1093.77	2823.46	0	0	0	0	0	0	0	0	0	0	0	0	0	0	0	0	0	760.605	0	0	0	1175.57	0	0	0	0	0	0	0	0
HMF003267	HMF003267A	5810.84	0	0	15588.2	0	0	0	0	0	0	0	0	0	0	0	0	2224.46	885.076	0	0	0	0	0	0	0	0	0	0	0	0	0	0	0	0	0	752.84	0	0	0	3324.92	0	0	0	0	0	0	0	0
HMF000741	HMF000741A	1468.2	0	0	580.393	0	0	0	0	0	0	0	0	0	0	0	0	94.8191	274.975	0	0	0	0	0	0	0	0	0	0	0	0	0	0	0	0	0	1065.47	0	0	0	1234.15	0	0	0	0	0	0	0	0
HMF000595	HMF000595A	6374.51	0	0	862.407	0	0	0	0	0	0	0	0	0	0	0	0	1408.67	3338.08	0	0	0	0	0	0	0	0	0	0	0	0	0	0	0	0	0	419.198	0	0	0	2421.14	0	0	0	0	0	0	0	0
HMF000401	HMF000401A	1339.2	0	0	0	0	0	0	0	0	0	0	0	0	0	0	0	39050.2	1325.2	0	0	0	0	0	0	0	0	0	0	0	0	0	0	0	0	0	2241.49	0	0	0	0	0	0	0	0	0	0	0	0
HMF000614	HMF000614A	7812.09	0	0	974.062	0	0	0	0	0	0	0	0	0	0	0	0	1210.17	933.372	0	0	0	0	0	0	0	0	0	0	0	0	0	0	0	0	0	0	0	0	0	3510.94	0	0	0	0	0	0	0	0
HMF002748	HMF002748A	9875.32	0	0	395.213	0	0	0	0	0	0	0	0	0	0	0	0	1748.15	3935.1	0	0	0	0	0	0	0	0	0	0	0	0	0	0	0	0	0	0	0	0	0	1250.76	0	0	0	0	0	0	0	0
HMF003146	HMF003146A	0	0	0	2141.75	0	0	0	0	0	0	0	0	0	0	0	0	11961.4	2386.07	0	0	0	0	0	0	0	0	0	0	0	0	0	0	0	0	0	3409.88	0	0	0	19717.8	0	0	0	0	0	0	0	0
HMF003533	HMF003533A	4050.82	0	0	953.134	0	0	0	0	0	0	0	0	0	0	0	0	1459.86	2457.24	0	0	0	0	0	0	0	0	0	0	0	0	0	0	0	0	0	891.804	0	0	0	6306.47	0	0	0	0	0	0	0	0
HMF002998	HMF002998A	7063.81	0	0	2216.2	0	0	0	0	0	0	0	0	0	0	0	0	4017.67	1119.6	0	0	0	0	0	0	0	0	0	0	0	0	0	0	0	0	0	1971.56	0	0	0	9541.15	0	0	0	0	0	0	0	0
HMF003061	HMF003061A	6889.68	0	0	1339.6	0	0	0	0	0	0	0	0	0	0	0	0	1170.41	2787.01	0	0	0	0	0	0	0	0	0	0	0	0	0	0	0	0	0	0	0	0	0	2338.82	0	0	0	0	0	0	0	0
HMF003322	HMF003322A	11186.4	0	0	543.202	0	0	0	0	0	0	0	0	0	0	0	0	913.999	1795.52	0	0	0	0	0	0	0	0	0	0	0	0	0	0	0	0	0	572.187	0	0	0	2333.72	0	0	0	0	0	0	0	0
HMF000559	HMF000559A	5437.88	0	0	1187.82	0	0	0	0	0	266.347	0	0	0	0	0	0	1391.7	2431.6	0	0	0	0	0	0	0	0	0	0	0	0	0	0	0	0	0	674.613	0	0	0	1670.04	0	0	0	0	0	0	0	0
HMF003675	HMF003675A	7036.69	0	0	818.15	0	0	0	0	0	0	0	0	0	0	0	0	1766.56	0	0	0	0	0	0	0	0	0	0	0	0	0	0	0	0	0	0	491.992	0	0	0	910.837	0	0	0	0	0	0	0	0
HMF001590	HMF001590A	7975.5	0	0	1109.26	0	0	0	0	0	0	0	0	0	0	0	0	5317.67	542.874	0	0	0	0	0	0	0	0	0	0	0	0	0	0	0	0	0	1329.92	0	0	0	10115.5	0	0	0	0	0	0	0	0
HMF003218	HMF003218A	3943.54	0	0	1447.07	0	0	0	0	0	0	0	0	0	0	0	0	7645.49	3370.32	0	0	0	0	0	0	0	0	0	0	0	0	0	0	0	0	0	612.239	0	0	0	6978.23	0	0	0	0	0	0	0	0
HMF001505	HMF001505A	11537.7	0	0	1545.76	0	0	0	0	0	584.408	0	0	0	0	0	0	2674.58	1435.27	0	0	0	0	0	0	0	0	0	0	0	0	0	0	0	0	0	1346.29	0	0	0	3084.01	0	0	0	0	0	0	0	0
HMF002441	HMF002441B	5376.44	0	0	0	0	0	0	0	0	303.209	0	0	0	0	0	0	5109.87	0	0	0	0	0	0	0	0	0	0	0	0	0	0	0	0	0	0	0	0	0	0	4039.61	0	0	0	0	0	0	0	0
HMF000032	HMF000032A	8470.58	0	0	0	0	0	0	0	0	1332.6	0	0	0	0	0	0	476.498	1639.27	0	0	0	0	0	0	0	0	0	0	0	0	0	0	0	0	0	2263.12	0	0	0	798.16	0	0	0	0	0	0	0	0
HMF001804	HMF001804A	0	0	0	3920.57	0	0	0	0	0	0	0	0	0	0	0	0	62899.7	0	0	0	0	0	0	0	0	0	0	0	0	0	0	0	0	0	0	5793.09	0	0	0	9618.63	0	0	0	0	0	0	0	0
HMF003576	HMF003576A	4217.71	0	0	268.077	0	0	0	0	0	0	0	0	0	0	0	0	504.145	1720.49	0	0	0	0	0	0	0	0	0	0	0	0	0	0	0	0	0	399.115	0	0	0	1374.9	0	0	0	0	0	0	0	0
HMF002719	HMF002719A	3819.06	0	0	575.584	0	0	0	0	0	0	0	0	0	0	0	0	683.599	2063.8	0	0	0	0	0	0	0	0	0	0	0	0	0	0	0	0	0	951.638	0	0	0	2056.3	0	0	0	0	0	0	0	0
HMF001049	HMF001049A	8679.66	0	0	2761.16	0	0	0	0	0	0	0	0	0	0	0	0	967.408	1624.68	0	0	0	0	0	0	0	0	0	0	0	0	0	0	0	0	0	1163.49	0	0	0	5864.97	0	0	0	0	0	0	0	0
HMF003324	HMF003324A	6794.42	0	0	0	0	0	0	0	0	0	0	0	0	0	0	0	932.018	2340.56	0	0	0	0	0	0	0	0	0	0	0	0	0	0	0	0	0	0	0	0	0	4265.16	0	0	0	0	0	0	0	0
HMF002057	HMF002057A	6359.31	0	0	1510.35	0	0	0	0	0	0	0	0	0	0	0	0	1717.61	3627.95	0	0	0	0	0	0	0	0	0	0	0	0	0	0	0	0	0	370.455	0	0	0	2257.77	0	0	0	0	0	0	0	0
HMF001783	HMF001783A	9727.7	0	0	0	0	0	0	0	0	0	0	0	0	0	0	0	6662.29	2880.22	0	0	0	0	0	0	0	0	0	0	0	0	0	0	0	0	0	1393.69	0	0	0	1888.03	0	0	0	0	0	0	0	0
HMF001498	HMF001498A	3410.02	0	0	840.772	0	0	0	0	0	0	0	0	0	0	0	0	15272.7	707.467	0	0	0	0	0	0	0	0	0	0	0	0	0	0	0	0	0	1648.59	0	0	0	1059.45	0	0	0	0	0	0	0	0
HMF001277	HMF001277A	6851.79	0	0	0	0	0	0	0	0	459.332	0	0	0	0	0	0	381.939	888.511	0	0	0	0	0	0	0	0	0	0	0	0	0	0	0	0	0	469.886	0	0	0	1331.76	0	0	0	0	0	0	0	0
HMF002361	HMF002361B	6468.83	0	0	0	0	0	0	0	0	0	0	0	0	0	0	0	4213.33	2244.97	0	0	0	0	0	0	0	0	0	0	0	0	0	0	0	0	0	0	0	0	0	2320.14	0	0	0	0	0	0	0	0
HMF000628	HMF000628C	1344.95	0	0	3490.98	0	0	0	0	0	962.891	0	0	0	0	0	0	38703.4	1922.79	0	0	0	0	0	0	0	0	0	0	0	0	0	0	0	0	0	3552.91	0	0	0	3008.04	0	0	0	0	0	0	0	0
HMF003759	HMF003759A	3559.02	0	0	1779.26	0	0	0	0	0	0	0	0	0	0	0	0	9846.59	1890.62	0	0	0	0	0	0	0	0	0	0	0	0	0	0	0	0	0	1379.26	0	0	0	1987.5	0	0	0	0	0	0	0	0
HMF000630	HMF000630A	4930.11	0	0	1793.45	0	0	0	0	0	0	0	0	0	0	0	0	2860.51	4774.03	0	0	0	0	0	0	0	0	0	0	0	0	0	0	0	0	0	1078.07	0	0	0	11010.8	0	0	0	0	0	0	0	0
HMF003361	HMF003361A	50107.8	0	0	0	0	0	0	0	0	0	0	0	0	0	0	0	3369.91	0	0	0	0	0	0	0	0	0	0	0	0	0	0	0	0	0	0	36849.1	0	0	0	1309.08	0	0	0	0	0	0	0	0
HMF000369	HMF000369A	5791.7	0	0	691.046	0	0	0	0	0	0	0	0	0	0	0	0	1549.48	1094.28	0	0	0	0	0	0	0	0	0	0	0	0	0	0	0	0	0	442.21	0	0	0	4611.47	0	0	0	0	0	0	0	0
HMF002213	HMF002213A	2690.46	0	0	645.63	0	0	0	0	0	0	0	0	0	0	0	0	373.786	813.534	0	0	0	0	0	0	0	0	0	0	0	0	0	0	0	0	0	1135.35	0	0	0	2035.33	0	0	0	0	0	0	0	0
HMF002000	HMF002000A	8271.72	0	0	0	0	0	0	0	0	0	0	0	0	0	0	0	1669.25	2555.42	0	0	0	0	0	0	0	0	0	0	0	0	0	0	0	0	0	0	0	0	0	519.39	0	0	0	0	0	0	0	0
HMF002082	HMF002082A	4894.21	0	0	477.24	0	0	0	0	0	0	0	0	0	0	0	0	1176.13	516.178	0	0	0	0	0	0	0	0	0	0	0	0	0	0	0	0	0	0	0	0	0	1728.25	0	0	0	0	0	0	0	0
HMF000285	HMF000285A	5790.15	0	0	1847.8	0	0	0	0	0	0	0	0	0	0	0	0	10501.8	815.797	0	0	0	0	0	0	0	0	0	0	0	0	0	0	0	0	0	0	0	0	0	2236.18	0	0	0	0	0	0	0	0
HMF001270	HMF001270A	4387.15	0	0	0	0	0	0	0	0	0	0	0	0	0	0	0	2043.26	0	0	0	0	0	0	0	0	0	0	0	0	0	0	0	0	0	0	0	0	0	0	3467.74	0	0	0	0	0	0	0	0
HMF003610	HMF003610A	5756.2	0	0	517.613	0	0	0	0	0	390.209	0	0	0	0	0	0	390.708	3937.56	0	0	0	0	0	0	0	0	0	0	0	0	0	0	0	0	0	588.56	0	0	0	1140.15	0	0	0	0	0	0	0	0
HMF001830	HMF001830A	5754.17	0	0	1775.28	0	0	0	0	0	0	0	0	0	0	0	0	3559.56	1244.5	0	0	0	0	0	0	0	0	0	0	0	0	0	0	0	0	0	1829.26	0	0	0	9001.35	0	0	0	0	0	0	0	0
HMF001408	HMF001408A	8128.66	0	0	257.989	0	0	0	0	0	0	0	0	0	0	0	0	274.05	1268.86	0	0	0	0	0	0	0	0	0	0	0	0	0	0	0	0	0	272.043	0	0	0	364.397	0	0	0	0	0	0	0	0
HMF002750	HMF002750A	2850.02	0	0	531.964	0	0	0	0	0	0	0	0	0	0	0	0	2847.01	1780.57	0	0	0	0	0	0	0	0	0	0	0	0	0	0	0	0	0	637.353	0	0	0	2699.47	0	0	0	0	0	0	0	0
HMF003305	HMF003305A	4151.27	0	0	255.509	0	0	0	0	0	0	0	0	0	0	0	0	1488.47	837.168	0	0	0	0	0	0	0	0	0	0	0	0	0	0	0	0	0	260.519	0	0	0	4549.07	0	0	0	0	0	0	0	0
HMF001238	HMF001238A	6817.24	0	0	1347.33	0	0	0	0	0	0	0	0	0	0	0	0	251.248	1747.73	0	0	0	0	0	0	0	0	0	0	0	0	0	0	0	0	0	1165.15	0	0	0	1821.3	0	0	0	0	0	0	0	0
HMF000512	HMF000512B	62267	0	0	0	0	0	0	0	0	3831.17	0	0	0	0	0	0	3103.57	0	0	0	0	0	0	0	0	0	0	0	0	0	0	0	0	0	0	49246.8	0	0	0	1698.41	0	0	0	0	0	0	0	0
HMF000642	HMF000642A	4994.62	0	0	659.186	0	0	0	0	0	0	0	0	0	0	0	0	1149.45	3211.97	0	0	0	0	0	0	0	0	0	0	0	0	0	0	0	0	0	925.56	0	0	0	1667.21	0	0	0	0	0	0	0	0
HMF002949	HMF002949A	3401.61	0	0	246.573	0	0	0	0	0	0	0	0	0	0	0	0	210.136	1704.05	0	0	0	0	0	0	0	0	0	0	0	0	0	0	0	0	0	554.04	0	0	0	1841.81	0	0	0	0	0	0	0	0
HMF002897	HMF002897A	7140.15	0	0	1458.71	0	0	0	0	0	0	0	0	0	0	0	0	1054.18	2036.18	0	0	0	0	0	0	0	0	0	0	0	0	0	0	0	0	0	1091.27	0	0	0	2559.01	0	0	0	0	0	0	0	0
HMF000527	HMF000527A	6678.39	0	0	532.635	0	0	0	0	0	308.21	0	0	0	0	0	0	739.605	641.356	0	0	0	0	0	0	0	0	0	0	0	0	0	0	0	0	0	688.236	0	0	0	1266.75	0	0	0	0	0	0	0	0
HMF003125	HMF003125A	2388.94	0	0	17404.1	0	0	0	0	0	0	0	0	0	0	0	0	6447.74	2904.36	0	0	0	0	0	0	0	0	0	0	0	0	0	0	0	0	0	1317.57	0	0	0	5771.69	0	0	0	0	0	0	0	0
HMF000566	HMF000566A	6704.16	0	0	0	0	0	0	0	0	0	0	0	0	0	0	0	1584.35	3895.16	0	0	0	0	0	0	0	0	0	0	0	0	0	0	0	0	0	0	0	0	0	999.378	0	0	0	0	0	0	0	0
HMF000752	HMF000752A	4782.89	0	0	1997.37	0	0	0	0	0	0	0	0	0	0	0	0	3111.58	2242.92	0	0	0	0	0	0	0	0	0	0	0	0	0	0	0	0	0	1819.84	0	0	0	4659.36	0	0	0	0	0	0	0	0
HMF003100	HMF003100A	6801.04	0	0	631.386	0	0	0	0	0	0	0	0	0	0	0	0	2606.66	438.115	0	0	0	0	0	0	0	0	0	0	0	0	0	0	0	0	0	418.587	0	0	0	6527.66	0	0	0	0	0	0	0	0
HMF003445	HMF003445A	5089.2	0	0	420.889	0	0	0	0	0	0	0	0	0	0	0	0	3197.95	1961.31	0	0	0	0	0	0	0	0	0	0	0	0	0	0	0	0	0	1326.22	0	0	0	9008.82	0	0	0	0	0	0	0	0
HMF003690	HMF003690A	7431.3	0	0	699.511	0	0	0	0	0	0	0	0	0	0	0	0	2423.8	669.532	0	0	0	0	0	0	0	0	0	0	0	0	0	0	0	0	0	1244.13	0	0	0	1824.72	0	0	0	0	0	0	0	0
HMF002847	HMF002847A	0	0	0	3615.1	0	0	0	0	0	526.461	0	0	0	0	0	0	497.408	16425.5	0	0	0	0	0	0	0	0	0	0	0	0	0	0	0	0	0	1105.52	0	0	0	1071.46	0	0	0	0	0	0	0	0
HMF000845	HMF000845A	9625.81	0	0	0	0	0	0	0	0	878.433	0	0	0	0	0	0	1459.73	1544.12	0	0	0	0	0	0	0	0	0	0	0	0	0	0	0	0	0	3962.69	0	0	0	641.221	0	0	0	0	0	0	0	0
HMF002332	HMF002332A	5410.8	0	0	815.819	0	0	0	0	0	0	0	0	0	0	0	0	1877.08	1775.11	0	0	0	0	0	0	0	0	0	0	0	0	0	0	0	0	0	622.862	0	0	0	4921.91	0	0	0	0	0	0	0	0
HMF001370	HMF001370A	6176.92	0	0	297.261	0	0	0	0	0	0	0	0	0	0	0	0	0	3239.34	0	0	0	0	0	0	0	0	0	0	0	0	0	0	0	0	0	0	0	0	0	0	0	0	0	0	0	0	0	0
HMF002276	HMF002276A	7309.28	0	0	0	0	0	0	0	0	0	0	0	0	0	0	0	5277.08	0	0	0	0	0	0	0	0	0	0	0	0	0	0	0	0	0	0	1069.07	0	0	0	2771.86	0	0	0	0	0	0	0	0
HMF002848	HMF002848A	5716.95	0	0	861.746	0	0	0	0	0	604.524	0	0	0	0	0	0	0	3177.25	0	0	0	0	0	0	0	0	0	0	0	0	0	0	0	0	0	1263.59	0	0	0	386.335	0	0	0	0	0	0	0	0
HMF001085	HMF001085A	5867.17	0	0	0	0	0	0	0	0	0	0	0	0	0	0	0	4821.95	4972.69	0	0	0	0	0	0	0	0	0	0	0	0	0	0	0	0	0	607.501	0	0	0	1849.55	0	0	0	0	0	0	0	0
HMF000049	HMF000049A	7793.86	0	0	0	0	0	0	0	0	0	0	0	0	0	0	0	0	0	0	0	0	0	0	0	0	0	0	0	0	0	0	0	0	0	0	454.438	0	0	0	4632.27	0	0	0	0	0	0	0	0
HMF003208	HMF003208A	4618.02	0	0	1974.15	0	0	0	0	0	0	0	0	0	0	0	0	1343.96	3746.57	0	0	0	0	0	0	0	0	0	0	0	0	0	0	0	0	0	1040.13	0	0	0	3827.16	0	0	0	0	0	0	0	0
HMF000015	HMF000015A	5025.16	0	0	0	0	0	0	0	0	0	0	0	0	0	0	0	1291.09	2280.14	0	0	0	0	0	0	0	0	0	0	0	0	0	0	0	0	0	479.448	0	0	0	2792.26	0	0	0	0	0	0	0	0
HMF001176	HMF001176A	4041.2	0	0	818.44	0	0	0	0	0	0	0	0	0	0	0	0	10047.3	789.942	0	0	0	0	0	0	0	0	0	0	0	0	0	0	0	0	0	1844.36	0	0	0	2656.3	0	0	0	0	0	0	0	0
HMF003440	HMF003440A	3570.99	0	0	1113.3	0	0	0	0	0	0	0	0	0	0	0	0	154.389	0	0	0	0	0	0	0	0	0	0	0	0	0	0	0	0	0	0	334.843	0	0	0	871.695	0	0	0	0	0	0	0	0
HMF001424	HMF001424A	3514.89	0	0	455.56	0	0	0	0	0	0	0	0	0	0	0	0	391.269	0	0	0	0	0	0	0	0	0	0	0	0	0	0	0	0	0	0	768.977	0	0	0	1208.97	0	0	0	0	0	0	0	0
HMF000022	HMF000022A	1694.61	0	0	1892.2	0	0	0	0	0	0	0	0	0	0	0	0	5554.24	3605.87	0	0	0	0	0	0	0	0	0	0	0	0	0	0	0	0	0	1146.46	0	0	0	1218.67	0	0	0	0	0	0	0	0
HMF000169	HMF000169A	3606.74	0	0	2617.86	0	0	0	0	0	0	0	0	0	0	0	0	18543.4	4524.17	0	0	0	0	0	0	0	0	0	0	0	0	0	0	0	0	0	2948.65	0	0	0	11670.2	0	0	0	0	0	0	0	0
HMF001946	HMF001946A	6474.16	0	0	1066.24	0	0	0	0	0	0	0	0	0	0	0	0	11939.8	1308.47	0	0	0	0	0	0	0	0	0	0	0	0	0	0	0	0	0	531.113	0	0	0	921.298	0	0	0	0	0	0	0	0
HMF003349	HMF003349A	5950.01	0	0	2739.49	0	0	0	0	0	0	0	0	0	0	0	0	4757.9	2292.01	0	0	0	0	0	0	0	0	0	0	0	0	0	0	0	0	0	1582.46	0	0	0	4179.14	0	0	0	0	0	0	0	0
HMF002450	HMF002450A	1596.54	0	0	4322.46	0	0	0	0	0	0	0	0	0	0	0	0	9079.06	7515.54	0	0	0	0	0	0	0	0	0	0	0	0	0	0	0	0	0	2388.31	0	0	0	18001.1	0	0	0	0	0	0	0	0
HMF001023	HMF001023A	5858.26	0	0	660.755	0	0	0	0	0	0	0	0	0	0	0	0	429.166	1165.95	0	0	0	0	0	0	0	0	0	0	0	0	0	0	0	0	0	690.767	0	0	0	2851.1	0	0	0	0	0	0	0	0
HMF003873	HMF003873A	6615.41	0	0	1226.32	0	0	0	0	0	0	0	0	0	0	0	0	2010.44	2945.98	0	0	0	0	0	0	0	0	0	0	0	0	0	0	0	0	0	1280.97	0	0	0	3097.89	0	0	0	0	0	0	0	0
HMF000075	HMF000075A	2390.07	0	0	2259.59	0	0	0	0	0	0	0	0	0	0	0	0	9104.36	3640.84	0	0	0	0	0	0	0	0	0	0	0	0	0	0	0	0	0	515.407	0	0	0	918.834	0	0	0	0	0	0	0	0
HMF002810	HMF002810B	3105.36	0	0	2268.76	0	0	0	0	0	0	0	0	0	0	0	0	5003.58	2885.33	0	0	0	0	0	0	0	0	0	0	0	0	0	0	0	0	0	2605.8	0	0	0	10122.2	0	0	0	0	0	0	0	0
HMF001773	HMF001773A	1754.25	0	0	3284.83	0	0	0	0	0	0	0	0	0	0	0	0	13243.4	2768.97	0	0	0	0	0	0	0	0	0	0	0	0	0	0	0	0	0	2152.03	0	0	0	4665.82	0	0	0	0	0	0	0	0
HMF000364	HMF000364A	4723.66	0	0	3251.11	0	0	0	0	0	0	0	0	0	0	0	0	10132.2	3369.91	0	0	0	0	0	0	0	0	0	0	0	0	0	0	0	0	0	945.93	0	0	0	6203.21	0	0	0	0	0	0	0	0
HMF003139	HMF003139A	2565.08	0	0	588.847	0	0	0	0	0	0	0	0	0	0	0	0	189.075	3198.68	0	0	0	0	0	0	0	0	0	0	0	0	0	0	0	0	0	0	0	0	0	1056	0	0	0	0	0	0	0	0
HMF001307	HMF001307B	5845.02	0	0	439.276	0	0	0	0	0	0	0	0	0	0	0	0	235.38	2183.39	0	0	0	0	0	0	0	0	0	0	0	0	0	0	0	0	0	0	0	0	0	1707.13	0	0	0	0	0	0	0	0
HMF002309	HMF002309A	2031.47	0	0	3632.93	0	0	0	0	0	0	0	0	0	0	0	0	5145.98	2961.3	0	0	0	0	0	0	0	0	0	0	0	0	0	0	0	0	0	1490.95	0	0	0	3010.03	0	0	0	0	0	0	0	0
HMF003444	HMF003444A	4188.26	0	0	1620.58	0	0	0	0	0	0	0	0	0	0	0	0	2217.61	910.885	0	0	0	0	0	0	0	0	0	0	0	0	0	0	0	0	0	467.765	0	0	0	1707.6	0	0	0	0	0	0	0	0
HMF002660	HMF002660A	4820.83	0	0	3638.87	0	0	0	0	0	0	0	0	0	0	0	0	459.983	2601.41	0	0	0	0	0	0	0	0	0	0	0	0	0	0	0	0	0	0	0	0	0	1972.43	0	0	0	0	0	0	0	0
HMF003565	HMF003565A	5329	0	0	854	0	0	0	0	0	0	0	0	0	0	0	0	535	3076	0	0	0	0	0	0	0	0	0	0	0	0	0	0	0	0	0	317	0	0	0	933.5	0	0	0	0	0	0	0	0
HMF003515	HMF003515A	12212.3	0	0	1287.67	0	0	0	0	0	914.105	0	0	0	0	0	0	718.548	429.725	0	0	0	0	0	0	0	0	0	0	0	0	0	0	0	0	0	1084.09	0	0	0	1916.96	0	0	0	0	0	0	0	0
HMF002694	HMF002694A	5382.1	0	0	1081.31	0	0	0	0	0	0	0	0	0	0	0	0	6539.33	2048.26	0	0	0	0	0	0	0	0	0	0	0	0	0	0	0	0	0	1726.11	0	0	0	5577.89	0	0	0	0	0	0	0	0
HMF000745	HMF000745A	5701.75	0	0	3150.51	0	0	0	0	0	0	0	0	0	0	0	0	598.261	5355.31	0	0	0	0	0	0	0	0	0	0	0	0	0	0	0	0	0	411.023	0	0	0	2862.14	0	0	0	0	0	0	0	0
HMF003323	HMF003323A	388456	0	0	192262	0	0	0	0	0	0	0	0	0	0	0	0	0	0	0	0	0	0	0	0	0	0	0	0	0	0	0	0	0	0	0	408055	0	0	0	0	0	0	0	0	0	0	0	0
HMF003197	HMF003197A	8822.84	0	0	474.776	0	0	0	0	0	0	0	0	0	0	0	0	723.659	1911.6	0	0	0	0	0	0	0	0	0	0	0	0	0	0	0	0	0	995.53	0	0	0	1862.62	0	0	0	0	0	0	0	0
HMF001942	HMF001942A	7404.55	0	0	2831.74	0	0	0	0	0	0	0	0	0	0	0	0	1553.95	2340.44	0	0	0	0	0	0	0	0	0	0	0	0	0	0	0	0	0	1048.14	0	0	0	6599.55	0	0	0	0	0	0	0	0
HMF002834	HMF002834A	6244.42	0	0	721.183	0	0	0	0	0	0	0	0	0	0	0	0	1906.31	2195.58	0	0	0	0	0	0	0	0	0	0	0	0	0	0	0	0	0	791.75	0	0	0	2796.65	0	0	0	0	0	0	0	0
HMF002204	HMF002204A	6473.19	0	0	1335.21	0	0	0	0	0	221.366	0	0	0	0	0	0	930.537	563.931	0	0	0	0	0	0	0	0	0	0	0	0	0	0	0	0	0	492.814	0	0	0	1942.71	0	0	0	0	0	0	0	0
HMF002957	HMF002957A	2978.18	0	0	4476.77	0	0	0	0	0	0	0	0	0	0	0	0	17862	4978.14	0	0	0	0	0	0	0	0	0	0	0	0	0	0	0	0	0	3403.49	0	0	0	6680.38	0	0	0	0	0	0	0	0
HMF001655	HMF001655A	4234.56	0	0	2040.29	0	0	0	0	0	0	0	0	0	0	0	0	1529.34	3116.18	0	0	0	0	0	0	0	0	0	0	0	0	0	0	0	0	0	481.95	0	0	0	2933.7	0	0	0	0	0	0	0	0
HMF000930	HMF000930A	6970.35	0	0	336.065	0	0	0	0	0	316.061	0	0	0	0	0	0	1593.81	1261.75	0	0	0	0	0	0	0	0	0	0	0	0	0	0	0	0	0	0	0	0	0	1729.84	0	0	0	0	0	0	0	0
HMF002045	HMF002045A	6213.44	0	0	462.144	0	0	0	0	0	341.606	0	0	0	0	0	0	569.177	1115.85	0	0	0	0	0	0	0	0	0	0	0	0	0	0	0	0	0	1038.32	0	0	0	1488.46	0	0	0	0	0	0	0	0
HMF001140	HMF001140A	7322.73	0	0	1499.41	0	0	0	0	0	0	0	0	0	0	0	0	1925.74	963.373	0	0	0	0	0	0	0	0	0	0	0	0	0	0	0	0	0	532.535	0	0	0	1934.26	0	0	0	0	0	0	0	0
HMF003215	HMF003215A	4292.17	0	0	1243.84	0	0	0	0	0	0	0	0	0	0	0	0	1949.53	2840.77	0	0	0	0	0	0	0	0	0	0	0	0	0	0	0	0	0	503.637	0	0	0	3533.96	0	0	0	0	0	0	0	0
HMF004206	HMF004206A	0	0	0	0	0	0	0	0	0	0	0	0	0	0	0	0	33963.9	0	0	0	0	0	0	0	0	0	0	0	0	0	0	0	0	0	0	3209.22	0	0	0	0	0	0	0	0	0	0	0	0
HMF001212	HMF001212A	5964.88	0	0	3451.17	0	0	0	0	0	0	0	0	0	0	0	0	3541.07	2755.44	0	0	0	0	0	0	0	0	0	0	0	0	0	0	0	0	0	2441.79	0	0	0	14294.6	0	0	0	0	0	0	0	0
HMF001027	HMF001027A	3718.29	0	0	2806.71	0	0	0	0	0	0	0	0	0	0	0	0	8923.9	6741.4	0	0	0	0	0	0	0	0	0	0	0	0	0	0	0	0	0	1469.82	0	0	0	4602.88	0	0	0	0	0	0	0	0
HMF002942	HMF002942A	4367.46	0	0	1500.97	0	0	0	0	0	0	0	0	0	0	0	0	5028.23	1519.96	0	0	0	0	0	0	0	0	0	0	0	0	0	0	0	0	0	1573.44	0	0	0	7256.94	0	0	0	0	0	0	0	0
HMF001097	HMF001097B	6249.14	0	0	604.496	0	0	0	0	0	0	0	0	0	0	0	0	515.703	512.192	0	0	0	0	0	0	0	0	0	0	0	0	0	0	0	0	0	252.835	0	0	0	1706.64	0	0	0	0	0	0	0	0
HMF002209	HMF002209A	2919.63	0	0	3838.56	0	0	0	0	0	0	0	0	0	0	0	0	33858.1	4446.33	0	0	0	0	0	0	0	0	0	0	0	0	0	0	0	0	0	3922.23	0	0	0	2991.28	0	0	0	0	0	0	0	0
HMF001520	HMF001520A	1553.18	0	0	501.237	0	0	0	0	0	0	0	0	0	0	0	0	23696.1	0	0	0	0	0	0	0	0	0	0	0	0	0	0	0	0	0	0	1830.04	0	0	0	730.617	0	0	0	0	0	0	0	0
HMF000152	HMF000152A	9842.74	0	0	602.453	0	0	0	0	0	0	0	0	0	0	0	0	2877.94	0	0	0	0	0	0	0	0	0	0	0	0	0	0	0	0	0	0	1813.88	0	0	0	3799.16	0	0	0	0	0	0	0	0
HMF000318	HMF000318A	146088	0	0	6487.94	0	0	0	0	0	5512.03	0	0	0	0	0	0	7051.4	0	0	0	0	0	0	0	0	0	0	0	0	0	0	0	0	0	0	103428	0	0	0	0	0	0	0	0	0	0	0	0
HMF001210	HMF001210A	3527.8	0	0	240.725	0	0	0	0	0	0	0	0	0	0	0	0	576.039	422.896	0	0	0	0	0	0	0	0	0	0	0	0	0	0	0	0	0	223.709	0	0	0	1715.61	0	0	0	0	0	0	0	0
HMF001388	HMF001388A	1756.59	0	0	3381.49	0	0	0	0	0	0	0	0	0	0	0	0	22915.8	656.468	0	0	0	0	0	0	0	0	0	0	0	0	0	0	0	0	0	1147.69	0	0	0	0	0	0	0	0	0	0	0	0
HMF002703	HMF002703A	8432.71	0	0	0	0	0	0	0	0	0	0	0	0	0	0	0	2818.9	480.227	0	0	0	0	0	0	0	0	0	0	0	0	0	0	0	0	0	544.191	0	0	0	3216.67	0	0	0	0	0	0	0	0
HMF002619	HMF002619A	4962.05	0	0	1429.08	0	0	0	0	0	0	0	0	0	0	0	0	1912.44	1376.1	0	0	0	0	0	0	0	0	0	0	0	0	0	0	0	0	0	758.779	0	0	0	1465.07	0	0	0	0	0	0	0	0
HMF003029	HMF003029A	5388.61	0	0	451.473	0	0	0	0	0	0	0	0	0	0	0	0	2601.1	0	0	0	0	0	0	0	0	0	0	0	0	0	0	0	0	0	0	431.93	0	0	0	3114.21	0	0	0	0	0	0	0	0
HMF002549	HMF002549A	0	0	0	5183.12	0	0	0	0	0	1034.02	0	0	0	0	0	0	876.443	34404.4	0	0	0	0	0	0	0	0	0	0	0	0	0	0	0	0	0	0	0	0	0	0	0	0	0	0	0	0	0	0
HMF002696	HMF002696A	12330.2	0	0	0	0	0	0	0	0	0	0	0	0	0	0	0	4851.32	5190.59	0	0	0	0	0	0	0	0	0	0	0	0	0	0	0	0	0	1415.62	0	0	0	7840.68	0	0	0	0	0	0	0	0
HMF003468	HMF003468A	991.524	0	0	1150.71	0	0	0	0	0	0	0	0	0	0	0	0	1761.99	0	0	0	0	0	0	0	0	0	0	0	0	0	0	0	0	0	0	1295.92	0	0	0	2719.08	0	0	0	0	0	0	0	0
HMF003634	HMF003634A	7831.56	0	0	712.957	0	0	0	0	0	0	0	0	0	0	0	0	331.052	3501.47	0	0	0	0	0	0	0	0	0	0	0	0	0	0	0	0	0	0	0	0	0	1100.85	0	0	0	0	0	0	0	0
HMF001767	HMF001767A	5329.95	0	0	0	0	0	0	0	0	0	0	0	0	0	0	0	903.492	589.759	0	0	0	0	0	0	0	0	0	0	0	0	0	0	0	0	0	607.356	0	0	0	1951.28	0	0	0	0	0	0	0	0
HMF001131	HMF001131B	3033.5	0	0	1557.05	0	0	0	0	0	0	0	0	0	0	0	0	14851.6	3574.71	0	0	0	0	0	0	0	0	0	0	0	0	0	0	0	0	0	1417.87	0	0	0	3987.26	0	0	0	0	0	0	0	0
HMF003727	HMF003727A	8442.76	0	0	927.644	0	0	0	0	0	0	0	0	0	0	0	0	687.236	1003.11	0	0	0	0	0	0	0	0	0	0	0	0	0	0	0	0	0	479.816	0	0	0	4091.43	0	0	0	0	0	0	0	0
HMF000813	HMF000813A	3728.87	0	0	0	0	0	0	0	0	0	0	0	0	0	0	0	6533.39	3094.82	0	0	0	0	0	0	0	0	0	0	0	0	0	0	0	0	0	1084.24	0	0	0	4095.11	0	0	0	0	0	0	0	0
HMF001538	HMF001538A	5036.17	0	0	0	0	0	0	0	0	0	0	0	0	0	0	0	3244.4	1014.94	0	0	0	0	0	0	0	0	0	0	0	0	0	0	0	0	0	1903.82	0	0	0	3630.07	0	0	0	0	0	0	0	0
HMF003782	HMF003782A	5790.57	0	0	0	0	0	0	0	0	0	0	0	0	0	0	0	0	1178.07	0	0	0	0	0	0	0	0	0	0	0	0	0	0	0	0	0	0	0	0	0	833.669	0	0	0	0	0	0	0	0
HMF002239	HMF002239A	9330.66	0	0	556.129	0	0	0	0	0	0	0	0	0	0	0	0	6391.98	1008.73	0	0	0	0	0	0	0	0	0	0	0	0	0	0	0	0	0	434.601	0	0	0	1725.9	0	0	0	0	0	0	0	0
HMF000098	HMF000098A	5891.5	0	0	356.516	0	0	0	0	0	0	0	0	0	0	0	0	269.634	3421.35	0	0	0	0	0	0	0	0	0	0	0	0	0	0	0	0	0	551.751	0	0	0	1156.93	0	0	0	0	0	0	0	0
HMF000067	HMF000067A	3310.31	0	0	0	0	0	0	0	0	0	0	0	0	0	0	0	134.256	245.468	0	0	0	0	0	0	0	0	0	0	0	0	0	0	0	0	0	486.427	0	0	0	242.462	0	0	0	0	0	0	0	0
HMF001503	HMF001503A	633.307	0	0	1646.6	0	0	0	0	0	0	0	0	0	0	0	0	25394.3	5120.52	0	0	0	0	0	0	0	0	0	0	0	0	0	0	0	0	0	2140.23	0	0	0	0	0	0	0	0	0	0	0	0
HMF001604	HMF001604A	1630.87	0	0	1804.41	0	0	0	0	0	0	0	0	0	0	0	0	25707.4	3285.25	0	0	0	0	0	0	0	0	0	0	0	0	0	0	0	0	0	2479.07	0	0	0	0	0	0	0	0	0	0	0	0
HMF000398	HMF000398A	5779.94	0	0	5696.49	0	0	0	0	0	0	0	0	0	0	0	0	3185.54	3046.12	0	0	0	0	0	0	0	0	0	0	0	0	0	0	0	0	0	2358.05	0	0	0	8663.16	0	0	0	0	0	0	0	0
HMF001497	HMF001497A	3306.39	0	0	0	0	0	0	0	0	0	0	0	0	0	0	0	0	0	0	0	0	0	0	0	0	0	0	0	0	0	0	0	0	0	0	312.065	0	0	0	941.686	0	0	0	0	0	0	0	0
HMF001723	HMF001723A	1998.08	0	0	0	0	0	0	0	0	0	0	0	0	0	0	0	8166.41	1268.88	0	0	0	0	0	0	0	0	0	0	0	0	0	0	0	0	0	470.343	0	0	0	4098.42	0	0	0	0	0	0	0	0
HMF001104	HMF001104A	5323.28	0	0	1067.75	0	0	0	0	0	750.328	0	0	0	0	0	0	1753.1	798.817	0	0	0	0	0	0	0	0	0	0	0	0	0	0	0	0	0	768.824	0	0	0	2360.96	0	0	0	0	0	0	0	0
HMF001522	HMF001522A	7489.39	0	0	3275.92	0	0	0	0	0	0	0	0	0	0	0	0	14857.8	3241.94	0	0	0	0	0	0	0	0	0	0	0	0	0	0	0	0	0	1954.06	0	0	0	2348.87	0	0	0	0	0	0	0	0
HMF000303	HMF000303A	2238.71	0	0	2165.18	0	0	0	0	0	0	0	0	0	0	0	0	15286.8	2637.33	0	0	0	0	0	0	0	0	0	0	0	0	0	0	0	0	0	1213.88	0	0	0	0	0	0	0	0	0	0	0	0
HMF001429	HMF001429A	1713.75	0	0	2976.31	0	0	0	0	0	0	0	0	0	0	0	0	12862.6	6505.36	0	0	0	0	0	0	0	0	0	0	0	0	0	0	0	0	0	2049.9	0	0	0	1221.04	0	0	0	0	0	0	0	0
HMF001688	HMF001688A	6241.09	0	0	428.831	0	0	0	0	0	0	0	0	0	0	0	0	1557.02	3386.06	0	0	0	0	0	0	0	0	0	0	0	0	0	0	0	0	0	0	0	0	0	0	0	0	0	0	0	0	0	0
HMF001501	HMF001501A	6767.64	0	0	1270.81	0	0	0	0	0	0	0	0	0	0	0	0	2229.68	1258.79	0	0	0	0	0	0	0	0	0	0	0	0	0	0	0	0	0	567.308	0	0	0	11439.8	0	0	0	0	0	0	0	0
HMF000870	HMF000870A	4372.74	0	0	2592.85	0	0	0	0	0	0	0	0	0	0	0	0	4018.17	4196.21	0	0	0	0	0	0	0	0	0	0	0	0	0	0	0	0	0	991.001	0	0	0	2819.04	0	0	0	0	0	0	0	0
HMF003051	HMF003051A	8497.11	0	0	2608.62	0	0	0	0	0	0	0	0	0	0	0	0	1366.94	2137.5	0	0	0	0	0	0	0	0	0	0	0	0	0	0	0	0	0	2517.79	0	0	0	5061.03	0	0	0	0	0	0	0	0
HMF003058	HMF003058A	4744.87	0	0	1771.87	0	0	0	0	0	0	0	0	0	0	0	0	3199.69	2355.13	0	0	0	0	0	0	0	0	0	0	0	0	0	0	0	0	0	545.151	0	0	0	1121.9	0	0	0	0	0	0	0	0
HMF002319	HMF002319A	7032.38	0	0	403.213	0	0	0	0	0	0	0	0	0	0	0	0	1134.82	1781.07	0	0	0	0	0	0	0	0	0	0	0	0	0	0	0	0	0	0	0	0	0	2055.74	0	0	0	0	0	0	0	0
HMF001319	HMF001319A	5157.4	0	0	649.649	0	0	0	0	0	0	0	0	0	0	0	0	5238.98	2821.45	0	0	0	0	0	0	0	0	0	0	0	0	0	0	0	0	0	0	0	0	0	4846.5	0	0	0	0	0	0	0	0
HMF002205	HMF002205A	6324.6	0	0	282.33	0	0	0	0	0	0	0	0	0	0	0	0	427.257	887.61	0	0	0	0	0	0	0	0	0	0	0	0	0	0	0	0	0	0	0	0	0	1495.9	0	0	0	0	0	0	0	0
HMF000644	HMF000644A	25862.5	0	0	0	0	0	0	0	0	0	0	0	0	0	0	0	27802.5	0	0	0	0	0	0	0	0	0	0	0	0	0	0	0	0	0	0	103925	0	0	0	0	0	0	0	0	0	0	0	0
HMF003140	HMF003140A	739.775	0	0	0	0	0	0	0	0	0	0	0	0	0	0	0	13776.9	0	0	0	0	0	0	0	0	0	0	0	0	0	0	0	0	0	0	1166.72	0	0	0	506.53	0	0	0	0	0	0	0	0
HMF002422	HMF002422A	3557.02	0	0	553.604	0	0	0	0	0	326.742	0	0	0	0	0	0	7914.08	1386.77	0	0	0	0	0	0	0	0	0	0	0	0	0	0	0	0	0	1453.02	0	0	0	0	0	0	0	0	0	0	0	0
HMF001016	HMF001016A	3058.77	0	0	1050.12	0	0	0	0	0	0	0	0	0	0	0	0	2410.07	2227.38	0	0	0	0	0	0	0	0	0	0	0	0	0	0	0	0	0	909.471	0	0	0	2983.19	0	0	0	0	0	0	0	0
HMF002967	HMF002967A	3014.9	0	0	1841.91	0	0	0	0	0	0	0	0	0	0	0	0	20120.2	703.493	0	0	0	0	0	0	0	0	0	0	0	0	0	0	0	0	0	4389.31	0	0	0	3628.2	0	0	0	0	0	0	0	0
HMF002301	HMF002301A	4648.76	0	0	2818.24	0	0	0	0	0	0	0	0	0	0	0	0	737.907	2760.28	0	0	0	0	0	0	0	0	0	0	0	0	0	0	0	0	0	0	0	0	0	2007.39	0	0	0	0	0	0	0	0
HMF003483	HMF003483A	6608.96	0	0	0	0	0	0	0	0	0	0	0	0	0	0	0	133.949	1392.96	0	0	0	0	0	0	0	0	0	0	0	0	0	0	0	0	0	0	0	0	0	686.736	0	0	0	0	0	0	0	0
HMF002223	HMF002223A	6135.08	0	0	5284.07	0	0	0	0	0	0	0	0	0	0	0	0	2614.2	2184.94	0	0	0	0	0	0	0	0	0	0	0	0	0	0	0	0	0	3230.02	0	0	0	11094.7	0	0	0	0	0	0	0	0
HMF001508	HMF001508A	6000	0	0	2219.87	0	0	0	0	0	632.529	0	0	0	0	0	0	18235.6	2343.16	0	0	0	0	0	0	0	0	0	0	0	0	0	0	0	0	0	2415.34	0	0	0	6009.53	0	0	0	0	0	0	0	0
HMF003619	HMF003619A	7814.77	0	0	998.345	0	0	0	0	0	0	0	0	0	0	0	0	1340.82	4323.32	0	0	0	0	0	0	0	0	0	0	0	0	0	0	0	0	0	380.083	0	0	0	1109.66	0	0	0	0	0	0	0	0
HMF002616	HMF002616A	3180.66	0	0	390.502	0	0	0	0	0	485.746	0	0	0	0	0	0	1226.15	1185.54	0	0	0	0	0	0	0	0	0	0	0	0	0	0	0	0	0	422.083	0	0	0	6665.6	0	0	0	0	0	0	0	0
HMF002053	HMF002053A	7040.28	0	0	0	0	0	0	0	0	0	0	0	0	0	0	0	0	0	0	0	0	0	0	0	0	0	0	0	0	0	0	0	0	0	0	1703.53	0	0	0	5904.59	0	0	0	0	0	0	0	0
HMF002795	HMF002795A	7556.78	0	0	0	0	0	0	0	0	0	0	0	0	0	0	0	0	0	0	0	0	0	0	0	0	0	0	0	0	0	0	0	0	0	0	1182.15	0	0	0	6254.66	0	0	0	0	0	0	0	0
HMF003263	HMF003263A	8024.17	0	0	275.66	0	0	0	0	0	0	0	0	0	0	0	0	502.793	1017.09	0	0	0	0	0	0	0	0	0	0	0	0	0	0	0	0	0	0	0	0	0	2802.63	0	0	0	0	0	0	0	0
HMF003057	HMF003057A	6793.87	0	0	327.825	0	0	0	0	0	0	0	0	0	0	0	0	183.402	1139.89	0	0	0	0	0	0	0	0	0	0	0	0	0	0	0	0	0	0	0	0	0	579.191	0	0	0	0	0	0	0	0
HMF001213	HMF001213A	4416.12	0	0	1773.69	0	0	0	0	0	0	0	0	0	0	0	0	3511.68	4909.82	0	0	0	0	0	0	0	0	0	0	0	0	0	0	0	0	0	1101.52	0	0	0	3966.17	0	0	0	0	0	0	0	0
HMF001922	HMF001922A	6742.15	0	0	0	0	0	0	0	0	0	0	0	0	0	0	0	8101.78	2593.75	0	0	0	0	0	0	0	0	0	0	0	0	0	0	0	0	0	977.594	0	0	0	2068.2	0	0	0	0	0	0	0	0
HMF002100	HMF002100A	4408.06	0	0	620.854	0	0	0	0	0	0	0	0	0	0	0	0	1040.43	3502.32	0	0	0	0	0	0	0	0	0	0	0	0	0	0	0	0	0	806.109	0	0	0	1253.22	0	0	0	0	0	0	0	0
HMF003661	HMF003661A	6276.57	0	0	0	0	0	0	0	0	0	0	0	0	0	0	0	0	0	0	0	0	0	0	0	0	0	0	0	0	0	0	0	0	0	0	2081.69	0	0	0	4790.29	0	0	0	0	0	0	0	0
HMF001307	HMF001307A	6012.21	0	0	661.844	0	0	0	0	0	0	0	0	0	0	0	0	457.429	2504.59	0	0	0	0	0	0	0	0	0	0	0	0	0	0	0	0	0	383.278	0	0	0	1884.33	0	0	0	0	0	0	0	0
HMF003564	HMF003564A	8183.46	0	0	2950.79	0	0	0	0	0	0	0	0	0	0	0	0	11224.8	4987.02	0	0	0	0	0	0	0	0	0	0	0	0	0	0	0	0	0	2918.77	0	0	0	1900.15	0	0	0	0	0	0	0	0
HMF001652	HMF001652A	10022.8	0	0	964.151	0	0	0	0	0	0	0	0	0	0	0	0	2552.72	1728.17	0	0	0	0	0	0	0	0	0	0	0	0	0	0	0	0	0	1700.65	0	0	0	2754.86	0	0	0	0	0	0	0	0
HMF001544	HMF001544A	4826.93	0	0	1494.79	0	0	0	0	0	0	0	0	0	0	0	0	325.563	1696.33	0	0	0	0	0	0	0	0	0	0	0	0	0	0	0	0	0	307.559	0	0	0	1729.83	0	0	0	0	0	0	0	0
HMF000898	HMF000898A	12009.1	0	0	1743.82	0	0	0	0	0	0	0	0	0	0	0	0	409.868	2517.9	0	0	0	0	0	0	0	0	0	0	0	0	0	0	0	0	0	532.778	0	0	0	1949	0	0	0	0	0	0	0	0
HMF001486	HMF001486A	7847.26	0	0	0	0	0	0	0	0	0	0	0	0	0	0	0	13054.3	556.48	0	0	0	0	0	0	0	0	0	0	0	0	0	0	0	0	0	0	0	0	0	0	0	0	0	0	0	0	0	0
HMF000062	HMF000062A	1846.97	0	0	946.263	0	0	0	0	0	0	0	0	0	0	0	0	577.271	4664.23	0	0	0	0	0	0	0	0	0	0	0	0	0	0	0	0	0	1093.96	0	0	0	1360.32	0	0	0	0	0	0	0	0
HMF000916	HMF000916A	5548.97	0	0	898.847	0	0	0	0	0	0	0	0	0	0	0	0	648.029	393.214	0	0	0	0	0	0	0	0	0	0	0	0	0	0	0	0	0	435.184	0	0	0	1447.95	0	0	0	0	0	0	0	0
HMF003819	HMF003819A	3040.19	0	0	4503.71	0	0	0	0	0	0	0	0	0	0	0	0	5184.15	6873.48	0	0	0	0	0	0	0	0	0	0	0	0	0	0	0	0	0	2770.82	0	0	0	7311.08	0	0	0	0	0	0	0	0
HMF000833	HMF000833A	5889.9	0	0	582.021	0	0	0	0	0	0	0	0	0	0	0	0	737.428	512.841	0	0	0	0	0	0	0	0	0	0	0	0	0	0	0	0	0	458.198	0	0	0	2122.05	0	0	0	0	0	0	0	0
HMF003682	HMF003682A	8281.5	0	0	275.15	0	0	0	0	0	346.188	0	0	0	0	0	0	697.379	0	0	0	0	0	0	0	0	0	0	0	0	0	0	0	0	0	0	1948.06	0	0	0	988.037	0	0	0	0	0	0	0	0
HMF003187	HMF003187A	5252.54	0	0	1169.84	0	0	0	0	0	0	0	0	0	0	0	0	1896.18	6816.84	0	0	0	0	0	0	0	0	0	0	0	0	0	0	0	0	0	947.089	0	0	0	3458.98	0	0	0	0	0	0	0	0
HMF000041	HMF000041A	8019.99	0	0	1157.74	0	0	0	0	0	380.735	0	0	0	0	0	0	1961.29	4428.55	0	0	0	0	0	0	0	0	0	0	0	0	0	0	0	0	0	1651.19	0	0	0	3369.51	0	0	0	0	0	0	0	0
HMF001284	HMF001284A	4906.69	0	0	1145.28	0	0	0	0	0	0	0	0	0	0	0	0	10140.5	1302.82	0	0	0	0	0	0	0	0	0	0	0	0	0	0	0	0	0	476.616	0	0	0	361.588	0	0	0	0	0	0	0	0
HMF001379	HMF001379B	0	0	0	0	0	0	0	0	0	0	0	0	0	0	0	0	61146.9	0	0	0	0	0	0	0	0	0	0	0	0	0	0	0	0	0	0	3247.08	0	0	0	0	0	0	0	0	0	0	0	0
HMF002138	HMF002138A	7054.04	0	0	2281.54	0	0	0	0	0	0	0	0	0	0	0	0	792.167	2690.87	0	0	0	0	0	0	0	0	0	0	0	0	0	0	0	0	0	525.779	0	0	0	4516.6	0	0	0	0	0	0	0	0
HMF002515	HMF002515A	3022.19	0	0	2322.06	0	0	0	0	0	0	0	0	0	0	0	0	4819.15	1449.41	0	0	0	0	0	0	0	0	0	0	0	0	0	0	0	0	0	1132.44	0	0	0	2553.76	0	0	0	0	0	0	0	0
HMF004138	HMF004138A	6292.41	0	0	870.116	0	0	0	0	0	0	0	0	0	0	0	0	2125.39	1634.91	0	0	0	0	0	0	0	0	0	0	0	0	0	0	0	0	0	0	0	0	0	4879.17	0	0	0	0	0	0	0	0
HMF003558	HMF003558A	5506.05	0	0	322.436	0	0	0	0	0	0	0	0	0	0	0	0	578.976	2131.8	0	0	0	0	0	0	0	0	0	0	0	0	0	0	0	0	0	424.549	0	0	0	3103.63	0	0	0	0	0	0	0	0
HMF001005	HMF001005A	895.265	0	0	332.598	0	0	0	0	0	0	0	0	0	0	0	0	12266.6	0	0	0	0	0	0	0	0	0	0	0	0	0	0	0	0	0	0	1474.94	0	0	0	0	0	0	0	0	0	0	0	0
HMF000264	HMF000264A	10266.1	0	0	7644.72	0	0	0	0	0	4953.43	0	0	0	0	0	0	7161.62	0	0	0	0	0	0	0	0	0	0	0	0	0	0	0	0	0	0	60334	0	0	0	4769.08	0	0	0	0	0	0	0	0
HMF001872	HMF001872A	4044.01	0	0	654.596	0	0	0	0	0	0	0	0	0	0	0	0	1358.16	1839.37	0	0	0	0	0	0	0	0	0	0	0	0	0	0	0	0	0	2193.65	0	0	0	13926.9	0	0	0	0	0	0	0	0
HMF001328	HMF001328A	7632.5	0	0	412.419	0	0	0	0	0	0	0	0	0	0	0	0	687.865	3544.3	0	0	0	0	0	0	0	0	0	0	0	0	0	0	0	0	0	449.412	0	0	0	2155.08	0	0	0	0	0	0	0	0
HMF003522	HMF003522A	6417.71	0	0	409.876	0	0	0	0	0	0	0	0	0	0	0	0	4859.38	457.979	0	0	0	0	0	0	0	0	0	0	0	0	0	0	0	0	0	878.878	0	0	0	3453.88	0	0	0	0	0	0	0	0
HMF003713	HMF003713A	4141.83	0	0	1144.32	0	0	0	0	0	0	0	0	0	0	0	0	893.856	2125.66	0	0	0	0	0	0	0	0	0	0	0	0	0	0	0	0	0	359.442	0	0	0	3495.94	0	0	0	0	0	0	0	0
HMF000747	HMF000747A	8109.93	0	0	1223.73	0	0	0	0	0	0	0	0	0	0	0	0	7401.87	2940.66	0	0	0	0	0	0	0	0	0	0	0	0	0	0	0	0	0	1760.4	0	0	0	2236.6	0	0	0	0	0	0	0	0
HMF003729	HMF003729A	8869.6	0	0	448.263	0	0	0	0	0	0	0	0	0	0	0	0	1271.16	2429.14	0	0	0	0	0	0	0	0	0	0	0	0	0	0	0	0	0	543.425	0	0	0	1124.92	0	0	0	0	0	0	0	0
HMF000664	HMF000664A	4916.8	0	0	302.287	0	0	0	0	0	0	0	0	0	0	0	0	3824.96	1999.21	0	0	0	0	0	0	0	0	0	0	0	0	0	0	0	0	0	0	0	0	0	1195.61	0	0	0	0	0	0	0	0
HMF002861	HMF002861A	4600.76	0	0	0	0	0	0	0	0	0	0	0	0	0	0	0	3044.67	754.042	0	0	0	0	0	0	0	0	0	0	0	0	0	0	0	0	0	0	0	0	0	501.528	0	0	0	0	0	0	0	0
HMF002467	HMF002467A	3164.11	0	0	0	0	0	0	0	0	383.559	0	0	0	0	0	0	17077.9	0	0	0	0	0	0	0	0	0	0	0	0	0	0	0	0	0	0	1218.78	0	0	0	1102.61	0	0	0	0	0	0	0	0
HMF001577	HMF001577A	2401.53	0	0	1495.83	0	0	0	0	0	0	0	0	0	0	0	0	1528.84	1859.41	0	0	0	0	0	0	0	0	0	0	0	0	0	0	0	0	0	951.209	0	0	0	7657.19	0	0	0	0	0	0	0	0
HMF001859	HMF001859A	10865.7	0	0	0	0	0	0	0	0	0	0	0	0	0	0	0	6347.01	2363.7	0	0	0	0	0	0	0	0	0	0	0	0	0	0	0	0	0	867.006	0	0	0	2196.11	0	0	0	0	0	0	0	0
HMF003492	HMF003492A	9574.18	0	0	1469.02	0	0	0	0	0	0	0	0	0	0	0	0	765.072	1724.54	0	0	0	0	0	0	0	0	0	0	0	0	0	0	0	0	0	0	0	0	0	2760.17	0	0	0	0	0	0	0	0
HMF000441	HMF000441A	3614.2	0	0	609.286	0	0	0	0	0	0	0	0	0	0	0	0	3783.78	3202	0	0	0	0	0	0	0	0	0	0	0	0	0	0	0	0	0	1605.25	0	0	0	7337.94	0	0	0	0	0	0	0	0
HMF002884	HMF002884A	4529.52	0	0	1111.14	0	0	0	0	0	394.371	0	0	0	0	0	0	1521.5	4960.88	0	0	0	0	0	0	0	0	0	0	0	0	0	0	0	0	0	1201.11	0	0	0	1557.49	0	0	0	0	0	0	0	0
HMF000202	HMF000202A	5528.51	0	0	2390.95	0	0	0	0	0	0	0	0	0	0	0	0	1725.41	2345.41	0	0	0	0	0	0	0	0	0	0	0	0	0	0	0	0	0	1634.33	0	0	0	4166.4	0	0	0	0	0	0	0	0
HMF002864	HMF002864B	6447.88	0	0	546.838	0	0	0	0	0	0	0	0	0	0	0	0	1055.12	2354.11	0	0	0	0	0	0	0	0	0	0	0	0	0	0	0	0	0	782.199	0	0	0	2415.2	0	0	0	0	0	0	0	0
HMF001051	HMF001051A	6673.89	0	0	1478.31	0	0	0	0	0	0	0	0	0	0	0	0	6806.51	2511.22	0	0	0	0	0	0	0	0	0	0	0	0	0	0	0	0	0	1018.9	0	0	0	7564.18	0	0	0	0	0	0	0	0
HMF001762	HMF001762A	4713.42	0	0	1630.06	0	0	0	0	0	0	0	0	0	0	0	0	4133	597.44	0	0	0	0	0	0	0	0	0	0	0	0	0	0	0	0	0	1790.32	0	0	0	3410.87	0	0	0	0	0	0	0	0
HMF000388	HMF000388A	4338.43	0	0	311.923	0	0	0	0	0	0	0	0	0	0	0	0	154.962	2176.96	0	0	0	0	0	0	0	0	0	0	0	0	0	0	0	0	0	205.449	0	0	0	841.792	0	0	0	0	0	0	0	0
HMF003388	HMF003388A	2022.71	0	0	936.302	0	0	0	0	0	0	0	0	0	0	0	0	0	4635.32	0	0	0	0	0	0	0	0	0	0	0	0	0	0	0	0	0	318.794	0	0	0	549.732	0	0	0	0	0	0	0	0
HMF000541	HMF000541A	4786.23	0	0	0	0	0	0	0	0	0	0	0	0	0	0	0	15599.4	4418.91	0	0	0	0	0	0	0	0	0	0	0	0	0	0	0	0	0	1033.61	0	0	0	538.514	0	0	0	0	0	0	0	0
HMF001513	HMF001513A	0	0	0	0	0	0	0	0	0	0	0	0	0	0	0	0	59076	0	0	0	0	0	0	0	0	0	0	0	0	0	0	0	0	0	0	3316	0	0	0	0	0	0	0	0	0	0	0	0
HMF001944	HMF001944A	3390.19	0	0	815.665	0	0	0	0	0	0	0	0	0	0	0	0	1572.82	1316.27	0	0	0	0	0	0	0	0	0	0	0	0	0	0	0	0	0	1001.2	0	0	0	11309.3	0	0	0	0	0	0	0	0
HMF000402	HMF000402A	3458.9	0	0	2257.65	0	0	0	0	0	0	0	0	0	0	0	0	8138.02	2596.8	0	0	0	0	0	0	0	0	0	0	0	0	0	0	0	0	0	1574.86	0	0	0	3575.78	0	0	0	0	0	0	0	0
HMF002284	HMF002284A	4763.87	0	0	873.302	0	0	0	0	0	744.183	0	0	0	0	0	0	2534.33	1973.81	0	0	0	0	0	0	0	0	0	0	0	0	0	0	0	0	0	2342.65	0	0	0	10190.9	0	0	0	0	0	0	0	0
HMF000287	HMF000287A	1459.94	0	0	0	0	0	0	0	0	532.978	0	0	0	0	0	0	5821.76	8688.64	0	0	0	0	0	0	0	0	0	0	0	0	0	0	0	0	0	2141.41	0	0	0	4674.3	0	0	0	0	0	0	0	0
HMF001512	HMF001512A	3710.46	0	0	1119.22	0	0	0	0	0	0	0	0	0	0	0	0	500.808	2033.13	0	0	0	0	0	0	0	0	0	0	0	0	0	0	0	0	0	1346.95	0	0	0	4459.43	0	0	0	0	0	0	0	0
HMF003394	HMF003394A	5824.14	0	0	675.676	0	0	0	0	0	0	0	0	0	0	0	0	7488.03	418.729	0	0	0	0	0	0	0	0	0	0	0	0	0	0	0	0	0	1166.53	0	0	0	3793.1	0	0	0	0	0	0	0	0
HMF001156	HMF001156A	7978.7	0	0	0	0	0	0	0	0	0	0	0	0	0	0	0	1037.55	2198.16	0	0	0	0	0	0	0	0	0	0	0	0	0	0	0	0	0	0	0	0	0	1718.4	0	0	0	0	0	0	0	0
HMF000689	HMF000689A	6521.4	0	0	491.766	0	0	0	0	0	519.253	0	0	0	0	0	0	6867.24	3776.71	0	0	0	0	0	0	0	0	0	0	0	0	0	0	0	0	0	1590.24	0	0	0	1280.39	0	0	0	0	0	0	0	0
HMF000461	HMF000461A	3896.47	0	0	1762.1	0	0	0	0	0	0	0	0	0	0	0	0	0	6285.85	0	0	0	0	0	0	0	0	0	0	0	0	0	0	0	0	0	589.205	0	0	0	2549.71	0	0	0	0	0	0	0	0
HMF000365	HMF000365A	8006.79	0	0	1566.3	0	0	0	0	0	0	0	0	0	0	0	0	3101.63	1170.23	0	0	0	0	0	0	0	0	0	0	0	0	0	0	0	0	0	539.413	0	0	0	7317.04	0	0	0	0	0	0	0	0
HMF002460	HMF002460A	6244.53	0	0	0	0	0	0	0	0	0	0	0	0	0	0	0	341.615	2310.93	0	0	0	0	0	0	0	0	0	0	0	0	0	0	0	0	0	593.808	0	0	0	1315.72	0	0	0	0	0	0	0	0
HMF001875	HMF001875A	1615.03	0	0	1778.09	0	0	0	0	0	0	0	0	0	0	0	0	9667.19	3016.49	0	0	0	0	0	0	0	0	0	0	0	0	0	0	0	0	0	2266.25	0	0	0	13173.8	0	0	0	0	0	0	0	0
HMF001346	HMF001346A	5331.93	0	0	925.166	0	0	0	0	0	0	0	0	0	0	0	0	1661.21	1300.92	0	0	0	0	0	0	0	0	0	0	0	0	0	0	0	0	0	919.677	0	0	0	4238.1	0	0	0	0	0	0	0	0
HMF003606	HMF003606A	3972.46	0	0	910.574	0	0	0	0	0	0	0	0	0	0	0	0	10706.1	1763.71	0	0	0	0	0	0	0	0	0	0	0	0	0	0	0	0	0	888.097	0	0	0	469.523	0	0	0	0	0	0	0	0
HMF000698	HMF000698A	0	0	0	97834.9	0	0	0	0	0	0	0	0	0	0	0	0	0	41933.4	0	0	0	0	0	0	0	0	0	0	0	0	0	0	0	0	0	4168.68	0	0	0	33449	0	0	0	0	0	0	0	0
HMF000089	HMF000089A	2688.1	0	0	2082.03	0	0	0	0	0	0	0	0	0	0	0	0	13088.7	3390.6	0	0	0	0	0	0	0	0	0	0	0	0	0	0	0	0	0	2960.41	0	0	0	7595.13	0	0	0	0	0	0	0	0
HMF000720	HMF000720A	7365.61	0	0	941.123	0	0	0	0	0	0	0	0	0	0	0	0	2132.31	1139.57	0	0	0	0	0	0	0	0	0	0	0	0	0	0	0	0	0	1591.59	0	0	0	4180.93	0	0	0	0	0	0	0	0
HMF003470	HMF003470A	4861.66	0	0	1183.55	0	0	0	0	0	0	0	0	0	0	0	0	1535.42	3534.16	0	0	0	0	0	0	0	0	0	0	0	0	0	0	0	0	0	1688.36	0	0	0	4339.86	0	0	0	0	0	0	0	0
HMF000906	HMF000906A	1567.85	0	0	0	0	0	0	0	0	0	0	0	0	0	0	0	29249.1	0	0	0	0	0	0	0	0	0	0	0	0	0	0	0	0	0	0	1012.87	0	0	0	0	0	0	0	0	0	0	0	0
HMF003360	HMF003360A	4332.12	0	0	486.626	0	0	0	0	0	0	0	0	0	0	0	0	758.696	806.209	0	0	0	0	0	0	0	0	0	0	0	0	0	0	0	0	0	653.669	0	0	0	10048.6	0	0	0	0	0	0	0	0
HMF004209	HMF004209A	7578.44	0	0	2187.96	0	0	0	0	0	0	0	0	0	0	0	0	4972.63	1517.59	0	0	0	0	0	0	0	0	0	0	0	0	0	0	0	0	0	1324.2	0	0	0	4020.19	0	0	0	0	0	0	0	0
HMF004185	HMF004185A	7963.45	0	0	346.911	0	0	0	0	0	0	0	0	0	0	0	0	208.446	371.405	0	0	0	0	0	0	0	0	0	0	0	0	0	0	0	0	0	0	0	0	0	832.786	0	0	0	0	0	0	0	0
HMF003895	HMF003895A	4769.65	0	0	0	0	0	0	0	0	0	0	0	0	0	0	0	2834.28	0	0	0	0	0	0	0	0	0	0	0	0	0	0	0	0	0	0	1247.56	0	0	0	5590.52	0	0	0	0	0	0	0	0
HMF000136	HMF000136A	10050.2	0	0	530.139	0	0	0	0	0	613.004	0	0	0	0	0	0	1155.62	0	0	0	0	0	0	0	0	0	0	0	0	0	0	0	0	0	0	1867.97	0	0	0	3593.66	0	0	0	0	0	0	0	0
HMF001601	HMF001601A	4238.52	0	0	1530.83	0	0	0	0	0	0	0	0	0	0	0	0	606.079	557.169	0	0	0	0	0	0	0	0	0	0	0	0	0	0	0	0	0	0	0	0	0	475.989	0	0	0	0	0	0	0	0
HMF002739	HMF002739A	7729.46	0	0	465.95	0	0	0	0	0	0	0	0	0	0	0	0	1069.53	3403.28	0	0	0	0	0	0	0	0	0	0	0	0	0	0	0	0	0	725.2	0	0	0	3191.58	0	0	0	0	0	0	0	0
HMF001674	HMF001674A	805.513	0	0	284.828	0	0	0	0	0	0	0	0	0	0	0	0	88.9462	0	0	0	0	0	0	0	0	0	0	0	0	0	0	0	0	0	0	702.075	0	0	0	563.659	0	0	0	0	0	0	0	0
HMF000523	HMF000523B	4075.64	0	0	1147.78	0	0	0	0	0	0	0	0	0	0	0	0	686.961	1264.61	0	0	0	0	0	0	0	0	0	0	0	0	0	0	0	0	0	567.119	0	0	0	2814.54	0	0	0	0	0	0	0	0
HMF003344	HMF003344A	5789.79	0	0	0	0	0	0	0	0	0	0	0	0	0	0	0	8061.72	0	0	0	0	0	0	0	0	0	0	0	0	0	0	0	0	0	0	1078.49	0	0	0	0	0	0	0	0	0	0	0	0
HMF002451	HMF002451A	5511.03	0	0	0	0	0	0	0	0	435.305	0	0	0	0	0	0	1091.01	1175.97	0	0	0	0	0	0	0	0	0	0	0	0	0	0	0	0	0	1104	0	0	0	3797.3	0	0	0	0	0	0	0	0
HMF000400	HMF000400A	1168.42	0	0	0	0	0	0	0	0	0	0	0	0	0	0	0	47241.5	0	0	0	0	0	0	0	0	0	0	0	0	0	0	0	0	0	0	3721.34	0	0	0	0	0	0	0	0	0	0	0	0
HMF003014	HMF003014A	5333.23	0	0	721.87	0	0	0	0	0	0	0	0	0	0	0	0	2554.81	5030.58	0	0	0	0	0	0	0	0	0	0	0	0	0	0	0	0	0	471.242	0	0	0	1488.26	0	0	0	0	0	0	0	0
HMF002236	HMF002236A	8860.44	0	0	355.538	0	0	0	0	0	0	0	0	0	0	0	0	226.024	3117.83	0	0	0	0	0	0	0	0	0	0	0	0	0	0	0	0	0	452.048	0	0	0	1196.13	0	0	0	0	0	0	0	0
HMF002804	HMF002804A	10609.7	0	0	952.405	0	0	0	0	0	0	0	0	0	0	0	0	683.509	9017.31	0	0	0	0	0	0	0	0	0	0	0	0	0	0	0	0	0	793.671	0	0	0	1627.9	0	0	0	0	0	0	0	0
HMF000821	HMF000821A	7430.89	0	0	2020.09	0	0	0	0	0	782.78	0	0	0	0	0	0	3057.45	873.987	0	0	0	0	0	0	0	0	0	0	0	0	0	0	0	0	0	2112.8	0	0	0	7377.77	0	0	0	0	0	0	0	0
HMF000286	HMF000286A	3549.01	0	0	2584.75	0	0	0	0	0	0	0	0	0	0	0	0	1472.26	1853.14	0	0	0	0	0	0	0	0	0	0	0	0	0	0	0	0	0	922.552	0	0	0	5813.18	0	0	0	0	0	0	0	0
HMF002059	HMF002059A	6076.56	0	0	554.919	0	0	0	0	0	0	0	0	0	0	0	0	929.54	3205.81	0	0	0	0	0	0	0	0	0	0	0	0	0	0	0	0	0	0	0	0	0	1326.2	0	0	0	0	0	0	0	0
HMF000742	HMF000742A	6872.58	0	0	350.03	0	0	0	0	0	0	0	0	0	0	0	0	499.042	2700.23	0	0	0	0	0	0	0	0	0	0	0	0	0	0	0	0	0	534.545	0	0	0	746.563	0	0	0	0	0	0	0	0
HMF003195	HMF003195A	0	0	0	6896.64	0	0	0	0	0	0	0	0	0	0	0	0	6835.12	3841.69	0	0	0	0	0	0	0	0	0	0	0	0	0	0	0	0	0	5119.09	0	0	0	9511.45	0	0	0	0	0	0	0	0
HMF003725	HMF003725A	5617.21	0	0	0	0	0	0	0	0	0	0	0	0	0	0	0	13178.3	1294.12	0	0	0	0	0	0	0	0	0	0	0	0	0	0	0	0	0	999.481	0	0	0	4278.06	0	0	0	0	0	0	0	0
HMF003539	HMF003539A	8905.12	0	0	1069.2	0	0	0	0	0	0	0	0	0	0	0	0	904.435	2528.51	0	0	0	0	0	0	0	0	0	0	0	0	0	0	0	0	0	844.84	0	0	0	2770.89	0	0	0	0	0	0	0	0
HMF001695	HMF001695A	6141.5	0	0	2604.92	0	0	0	0	0	0	0	0	0	0	0	0	1311.71	4221.18	0	0	0	0	0	0	0	0	0	0	0	0	0	0	0	0	0	1427.23	0	0	0	5716.93	0	0	0	0	0	0	0	0
HMF000552	HMF000552A	5604.56	0	0	1212.03	0	0	0	0	0	0	0	0	0	0	0	0	2029.06	4951.24	0	0	0	0	0	0	0	0	0	0	0	0	0	0	0	0	0	1648.58	0	0	0	7183.55	0	0	0	0	0	0	0	0
HMF003086	HMF003086A	4625.13	0	0	0	0	0	0	0	0	0	0	0	0	0	0	0	5623.56	682.709	0	0	0	0	0	0	0	0	0	0	0	0	0	0	0	0	0	456.48	0	0	0	426.819	0	0	0	0	0	0	0	0
HMF001599	HMF001599A	3482.16	0	0	3703.55	0	0	0	0	0	0	0	0	0	0	0	0	1917.89	6542.56	0	0	0	0	0	0	0	0	0	0	0	0	0	0	0	0	0	2967.75	0	0	0	3382.48	0	0	0	0	0	0	0	0
HMF000042	HMF000042A	3569.21	0	0	540.123	0	0	0	0	0	0	0	0	0	0	0	0	601.524	2613.76	0	0	0	0	0	0	0	0	0	0	0	0	0	0	0	0	0	597.031	0	0	0	2136.03	0	0	0	0	0	0	0	0
HMF002017	HMF002017B	6306.04	0	0	1027.62	0	0	0	0	0	0	0	0	0	0	0	0	5621.62	1201.98	0	0	0	0	0	0	0	0	0	0	0	0	0	0	0	0	0	1100.27	0	0	0	2882.46	0	0	0	0	0	0	0	0
HMF000850	HMF000850A	4122.67	0	0	1426.91	0	0	0	0	0	0	0	0	0	0	0	0	9889.31	1381.89	0	0	0	0	0	0	0	0	0	0	0	0	0	0	0	0	0	1753.5	0	0	0	2324.16	0	0	0	0	0	0	0	0
HMF001342	HMF001342A	7809.67	0	0	2046.24	0	0	0	0	0	0	0	0	0	0	0	0	1631.49	679.58	0	0	0	0	0	0	0	0	0	0	0	0	0	0	0	0	0	689.074	0	0	0	3975.54	0	0	0	0	0	0	0	0
HMF000572	HMF000572A	12150	0	0	0	0	0	0	0	0	0	0	0	0	0	0	0	0	0	0	0	0	0	0	0	0	0	0	0	0	0	0	0	0	0	0	12823.7	0	0	0	21562.6	0	0	0	0	0	0	0	0
HMF001550	HMF001550A	7825.27	0	0	3106.49	0	0	0	0	0	0	0	0	0	0	0	0	8908.13	0	0	0	0	0	0	0	0	0	0	0	0	0	0	0	0	0	0	5350.29	0	0	0	26442.7	0	0	0	0	0	0	0	0
HMF001796	HMF001796B	2950.54	0	0	5747.53	0	0	0	0	0	0	0	0	0	0	0	0	6065.64	5096.8	0	0	0	0	0	0	0	0	0	0	0	0	0	0	0	0	0	2136.75	0	0	0	7291.57	0	0	0	0	0	0	0	0
HMF001998	HMF001998A	3953.93	0	0	889.822	0	0	0	0	0	0	0	0	0	0	0	0	7434.19	992.359	0	0	0	0	0	0	0	0	0	0	0	0	0	0	0	0	0	597.216	0	0	0	1014.87	0	0	0	0	0	0	0	0
HMF000229	HMF000229A	11398.8	0	0	492.12	0	0	0	0	0	0	0	0	0	0	0	0	1270.31	675.164	0	0	0	0	0	0	0	0	0	0	0	0	0	0	0	0	0	578.14	0	0	0	3769.92	0	0	0	0	0	0	0	0
HMF003352	HMF003352A	5928.1	0	0	494.762	0	0	0	0	0	0	0	0	0	0	0	0	556.042	2619.48	0	0	0	0	0	0	0	0	0	0	0	0	0	0	0	0	0	856.415	0	0	0	1357.2	0	0	0	0	0	0	0	0
HMF003404	HMF003404A	5179.5	0	0	0	0	0	0	0	0	0	0	0	0	0	0	0	279.188	489.831	0	0	0	0	0	0	0	0	0	0	0	0	0	0	0	0	0	0	0	0	0	717.484	0	0	0	0	0	0	0	0
HMF001146	HMF001146A	7523.44	0	0	0	0	0	0	0	0	0	0	0	0	0	0	0	226.024	2240.7	0	0	0	0	0	0	0	0	0	0	0	0	0	0	0	0	0	0	0	0	0	298.191	0	0	0	0	0	0	0	0
HMF003262	HMF003262A	6211.02	0	0	722.188	0	0	0	0	0	0	0	0	0	0	0	0	1840.8	2034.25	0	0	0	0	0	0	0	0	0	0	0	0	0	0	0	0	0	1021.89	0	0	0	5713.85	0	0	0	0	0	0	0	0
HMF000799	HMF000799A	6735.97	0	0	778.456	0	0	0	0	0	0	0	0	0	0	0	0	553.258	2656.94	0	0	0	0	0	0	0	0	0	0	0	0	0	0	0	0	0	459.384	0	0	0	3001.47	0	0	0	0	0	0	0	0
HMF000467	HMF000467A	9682.03	0	0	1597.96	0	0	0	0	0	563.749	0	0	0	0	0	0	456.416	845.623	0	0	0	0	0	0	0	0	0	0	0	0	0	0	0	0	0	949.445	0	0	0	1378.78	0	0	0	0	0	0	0	0
HMF000555	HMF000555A	4110.63	0	0	1079.43	0	0	0	0	0	0	0	0	0	0	0	0	911.362	1825.23	0	0	0	0	0	0	0	0	0	0	0	0	0	0	0	0	0	404.161	0	0	0	6772.19	0	0	0	0	0	0	0	0
HMF001968	HMF001968A	6803.95	0	0	3388.26	0	0	0	0	0	0	0	0	0	0	0	0	1848.5	1953.75	0	0	0	0	0	0	0	0	0	0	0	0	0	0	0	0	0	580.588	0	0	0	3557.35	0	0	0	0	0	0	0	0
HMF003285	HMF003285A	8719.66	0	0	0	0	0	0	0	0	0	0	0	0	0	0	0	3612.64	1178.66	0	0	0	0	0	0	0	0	0	0	0	0	0	0	0	0	0	0	0	0	0	2236.04	0	0	0	0	0	0	0	0
HMF002255	HMF002255A	5689.67	0	0	1540.78	0	0	0	0	0	0	0	0	0	0	0	0	695.159	1529.75	0	0	0	0	0	0	0	0	0	0	0	0	0	0	0	0	0	642.495	0	0	0	1708.3	0	0	0	0	0	0	0	0
HMF002283	HMF002283A	5503.22	0	0	0	0	0	0	0	0	244.42	0	0	0	0	0	0	1186.47	1574.43	0	0	0	0	0	0	0	0	0	0	0	0	0	0	0	0	0	324.723	0	0	0	1786.73	0	0	0	0	0	0	0	0
HMF001404	HMF001404A	8734.01	0	0	532.836	0	0	0	0	0	0	0	0	0	0	0	0	4643.43	2618.15	0	0	0	0	0	0	0	0	0	0	0	0	0	0	0	0	0	1692.07	0	0	0	4776.51	0	0	0	0	0	0	0	0
HMF002274	HMF002274A	0	0	0	0	0	0	0	0	0	0	0	0	0	0	0	0	36735.7	0	0	0	0	0	0	0	0	0	0	0	0	0	0	0	0	0	0	4430.23	0	0	0	7693.48	0	0	0	0	0	0	0	0
HMF002976	HMF002976A	4866.61	0	0	1263.73	0	0	0	0	0	0	0	0	0	0	0	0	13581.4	2092.9	0	0	0	0	0	0	0	0	0	0	0	0	0	0	0	0	0	553.944	0	0	0	5180.3	0	0	0	0	0	0	0	0
HMF001105	HMF001105A	3445.87	0	0	718.056	0	0	0	0	0	0	0	0	0	0	0	0	16579.5	0	0	0	0	0	0	0	0	0	0	0	0	0	0	0	0	0	0	924.647	0	0	0	3480.97	0	0	0	0	0	0	0	0
HMF003133	HMF003133A	7538.04	0	0	0	0	0	0	0	0	0	0	0	0	0	0	0	181.949	659.755	0	0	0	0	0	0	0	0	0	0	0	0	0	0	0	0	0	0	0	0	0	601.289	0	0	0	0	0	0	0	0
HMF000533	HMF000533A	4203.74	0	0	0	0	0	0	0	0	0	0	0	0	0	0	0	6720.07	2827.18	0	0	0	0	0	0	0	0	0	0	0	0	0	0	0	0	0	307.346	0	0	0	867.978	0	0	0	0	0	0	0	0
HMF001242	HMF001242A	9227.8	0	0	0	0	0	0	0	0	0	0	0	0	0	0	0	3105.02	1719.49	0	0	0	0	0	0	0	0	0	0	0	0	0	0	0	0	0	0	0	0	0	3094.99	0	0	0	0	0	0	0	0
HMF003696	HMF003696A	2667.83	0	0	0	0	0	0	0	0	0	0	0	0	0	0	0	17965.3	948.862	0	0	0	0	0	0	0	0	0	0	0	0	0	0	0	0	0	1079.55	0	0	0	0	0	0	0	0	0	0	0	0
HMF001184	HMF001184B	1378.05	0	0	2707.59	0	0	0	0	0	0	0	0	0	0	0	0	17649.1	3336.84	0	0	0	0	0	0	0	0	0	0	0	0	0	0	0	0	0	2782.62	0	0	0	3208.79	0	0	0	0	0	0	0	0
HMF000547	HMF000547A	1092.69	0	0	2410.91	0	0	0	0	0	0	0	0	0	0	0	0	27659.2	2060.35	0	0	0	0	0	0	0	0	0	0	0	0	0	0	0	0	0	4470.26	0	0	0	6094.04	0	0	0	0	0	0	0	0
HMF000211	HMF000211A	3862.74	0	0	3214.78	0	0	0	0	0	0	0	0	0	0	0	0	2162.53	3428.93	0	0	0	0	0	0	0	0	0	0	0	0	0	0	0	0	0	719.01	0	0	0	1204.35	0	0	0	0	0	0	0	0
HMF001432	HMF001432B	3781.77	0	0	2918.67	0	0	0	0	0	0	0	0	0	0	0	0	5775.36	3407.94	0	0	0	0	0	0	0	0	0	0	0	0	0	0	0	0	0	2508.35	0	0	0	4439.47	0	0	0	0	0	0	0	0
HMF001255	HMF001255A	6943.2	0	0	1571.57	0	0	0	0	0	0	0	0	0	0	0	0	3043.36	2756.02	0	0	0	0	0	0	0	0	0	0	0	0	0	0	0	0	0	867.524	0	0	0	6507.44	0	0	0	0	0	0	0	0
HMF002741	HMF002741A	9429.37	0	0	2223.89	0	0	0	0	0	0	0	0	0	0	0	0	2418.18	3848.86	0	0	0	0	0	0	0	0	0	0	0	0	0	0	0	0	0	767.67	0	0	0	5232.47	0	0	0	0	0	0	0	0
HMF000587	HMF000587A	6002.18	0	0	1526.63	0	0	0	0	0	0	0	0	0	0	0	0	2391.54	3569	0	0	0	0	0	0	0	0	0	0	0	0	0	0	0	0	0	725.439	0	0	0	4441.43	0	0	0	0	0	0	0	0
HMF001960	HMF001960A	1615.71	0	0	0	0	0	0	0	0	0	0	0	0	0	0	0	29490.2	0	0	0	0	0	0	0	0	0	0	0	0	0	0	0	0	0	0	1457.79	0	0	0	0	0	0	0	0	0	0	0	0
HMF002502	HMF002502A	6076.6	0	0	1608.1	0	0	0	0	0	0	0	0	0	0	0	0	5850.46	2799.6	0	0	0	0	0	0	0	0	0	0	0	0	0	0	0	0	0	0	0	0	0	1301.05	0	0	0	0	0	0	0	0
HMF003151	HMF003151A	6673.01	0	0	952.499	0	0	0	0	0	0	0	0	0	0	0	0	2427.37	3618.49	0	0	0	0	0	0	0	0	0	0	0	0	0	0	0	0	0	716.379	0	0	0	2306.05	0	0	0	0	0	0	0	0
HMF000641	HMF000641B	10446.6	0	0	0	0	0	0	0	0	0	0	0	0	0	0	0	477.213	0	0	0	0	0	0	0	0	0	0	0	0	0	0	0	0	0	0	1513.26	0	0	0	14532.7	0	0	0	0	0	0	0	0
HMF001301	HMF001301A	5886.41	0	0	2604.67	0	0	0	0	0	331.777	0	0	0	0	0	0	2149.79	2286.41	0	0	0	0	0	0	0	0	0	0	0	0	0	0	0	0	0	724.104	0	0	0	3885.74	0	0	0	0	0	0	0	0
HMF000306	HMF000306A	3021.97	0	0	671.995	0	0	0	0	0	0	0	0	0	0	0	0	9709.38	1096.62	0	0	0	0	0	0	0	0	0	0	0	0	0	0	0	0	0	1278.89	0	0	0	2407.56	0	0	0	0	0	0	0	0
HMF002292	HMF002292A	4884.6	0	0	870.621	0	0	0	0	0	0	0	0	0	0	0	0	12207.2	2105.42	0	0	0	0	0	0	0	0	0	0	0	0	0	0	0	0	0	632.177	0	0	0	4082.1	0	0	0	0	0	0	0	0
HMF002766	HMF002766A	0	0	0	5745.83	0	0	0	0	0	0	0	0	0	0	0	0	17643.4	0	0	0	0	0	0	0	0	0	0	0	0	0	0	0	0	0	0	1379.52	0	0	0	6858.05	0	0	0	0	0	0	0	0
HMF002907	HMF002907A	5942.42	0	0	985.643	0	0	0	0	0	0	0	0	0	0	0	0	390.349	2532.01	0	0	0	0	0	0	0	0	0	0	0	0	0	0	0	0	0	588.78	0	0	0	2700.37	0	0	0	0	0	0	0	0
HMF001234	HMF001234A	5232.32	0	0	319.917	0	0	0	0	0	0	0	0	0	0	0	0	278.363	455.093	0	0	0	0	0	0	0	0	0	0	0	0	0	0	0	0	0	0	0	0	0	854.614	0	0	0	0	0	0	0	0
HMF003437	HMF003437A	8820.41	0	0	1496.44	0	0	0	0	0	0	0	0	0	0	0	0	1148.49	3871.01	0	0	0	0	0	0	0	0	0	0	0	0	0	0	0	0	0	0	0	0	0	4008.19	0	0	0	0	0	0	0	0
HMF000859	HMF000859A	3508.63	0	0	0	0	0	0	0	0	0	0	0	0	0	0	0	8308.5	1280.73	0	0	0	0	0	0	0	0	0	0	0	0	0	0	0	0	0	382.069	0	0	0	0	0	0	0	0	0	0	0	0
HMF002224	HMF002224A	6062.35	0	0	1695.54	0	0	0	0	0	409.045	0	0	0	0	0	0	8560.51	1574.32	0	0	0	0	0	0	0	0	0	0	0	0	0	0	0	0	0	1826.24	0	0	0	1072.99	0	0	0	0	0	0	0	0
HMF000436	HMF000436A	7469.24	0	0	293.627	0	0	0	0	0	0	0	0	0	0	0	0	0	1642.21	0	0	0	0	0	0	0	0	0	0	0	0	0	0	0	0	0	0	0	0	0	390.669	0	0	0	0	0	0	0	0
HMF000469	HMF000469A	8012.17	0	0	3316.14	0	0	0	0	0	0	0	0	0	0	0	0	1411.41	3428.21	0	0	0	0	0	0	0	0	0	0	0	0	0	0	0	0	0	2009.8	0	0	0	5074.27	0	0	0	0	0	0	0	0
HMF003221	HMF003221A	5183.84	0	0	1740.26	0	0	0	0	0	0	0	0	0	0	0	0	4035.48	1223.72	0	0	0	0	0	0	0	0	0	0	0	0	0	0	0	0	0	353.841	0	0	0	2757.86	0	0	0	0	0	0	0	0
HMF000234	HMF000234A	10485.6	0	0	0	0	0	0	0	0	0	0	0	0	0	0	0	347.129	1930.78	0	0	0	0	0	0	0	0	0	0	0	0	0	0	0	0	0	0	0	0	0	1197.39	0	0	0	0	0	0	0	0
HMF000096	HMF000096B	0	0	0	2577.78	0	0	0	0	0	0	0	0	0	0	0	0	3483.58	1629.94	0	0	0	0	0	0	0	0	0	0	0	0	0	0	0	0	0	2914.58	0	0	0	25493.1	0	0	0	0	0	0	0	0
HMF003383	HMF003383A	3597.4	0	0	1923.36	0	0	0	0	0	0	0	0	0	0	0	0	3750.41	1387.59	0	0	0	0	0	0	0	0	0	0	0	0	0	0	0	0	0	3082.7	0	0	0	8709.81	0	0	0	0	0	0	0	0
HMF001490	HMF001490A	14519.7	0	0	0	0	0	0	0	0	675888	0	0	0	0	0	0	0	0	0	0	0	0	0	0	0	0	0	0	0	0	0	0	0	0	0	13901.2	0	0	0	0	0	0	0	0	0	0	0	0
HMF000596	HMF000596B	5559.9	0	0	2915.31	0	0	0	0	0	0	0	0	0	0	0	0	3593.34	5092.53	0	0	0	0	0	0	0	0	0	0	0	0	0	0	0	0	0	1698.34	0	0	0	7666.57	0	0	0	0	0	0	0	0
HMF002232	HMF002232B	3339.08	0	0	0	0	0	0	0	0	0	0	0	0	0	0	0	21535.5	6283.26	0	0	0	0	0	0	0	0	0	0	0	0	0	0	0	0	0	2738.24	0	0	0	0	0	0	0	0	0	0	0	0
HMF002148	HMF002148B	5861.72	0	0	2737.2	0	0	0	0	0	0	0	0	0	0	0	0	11041.3	0	0	0	0	0	0	0	0	0	0	0	0	0	0	0	0	0	0	2715.71	0	0	0	3559.31	0	0	0	0	0	0	0	0
HMF001756	HMF001756A	4620.55	0	0	2802.17	0	0	0	0	0	0	0	0	0	0	0	0	1639.15	3060.01	0	0	0	0	0	0	0	0	0	0	0	0	0	0	0	0	0	2422.17	0	0	0	6853.97	0	0	0	0	0	0	0	0
HMF002769	HMF002769A	3726.42	0	0	1090.54	0	0	0	0	0	0	0	0	0	0	0	0	13339.8	1729.77	0	0	0	0	0	0	0	0	0	0	0	0	0	0	0	0	0	645.726	0	0	0	2442.96	0	0	0	0	0	0	0	0
HMF002409	HMF002409A	8561.24	0	0	1295.87	0	0	0	0	0	0	0	0	0	0	0	0	1577.56	2468.16	0	0	0	0	0	0	0	0	0	0	0	0	0	0	0	0	0	942.132	0	0	0	2061.88	0	0	0	0	0	0	0	0
HMF001993	HMF001993A	4900.8	0	0	1193.51	0	0	0	0	0	0	0	0	0	0	0	0	9403.27	1217.56	0	0	0	0	0	0	0	0	0	0	0	0	0	0	0	0	0	1695.56	0	0	0	6089.3	0	0	0	0	0	0	0	0
HMF003371	HMF003371A	5520.89	0	0	317.114	0	0	0	0	0	0	0	0	0	0	0	0	1578.04	0	0	0	0	0	0	0	0	0	0	0	0	0	0	0	0	0	0	764.685	0	0	0	1991.99	0	0	0	0	0	0	0	0
HMF000667	HMF000667A	2431.45	0	0	678.019	0	0	0	0	0	0	0	0	0	0	0	0	8906.46	3844.62	0	0	0	0	0	0	0	0	0	0	0	0	0	0	0	0	0	1064.89	0	0	0	5922.27	0	0	0	0	0	0	0	0
HMF001256	HMF001256A	3360.75	0	0	0	0	0	0	0	0	0	0	0	0	0	0	0	24121.6	0	0	0	0	0	0	0	0	0	0	0	0	0	0	0	0	0	0	0	0	0	0	3193.51	0	0	0	0	0	0	0	0
HMF002688	HMF002688A	977.766	0	0	0	0	0	0	0	0	0	0	0	0	0	0	0	30853.7	0	0	0	0	0	0	0	0	0	0	0	0	0	0	0	0	0	0	1200.94	0	0	0	0	0	0	0	0	0	0	0	0
HMF000112	HMF000112B	3790.72	0	0	0	0	0	0	0	0	0	0	0	0	0	0	0	26360.4	0	0	0	0	0	0	0	0	0	0	0	0	0	0	0	0	0	0	1072.41	0	0	0	10646.1	0	0	0	0	0	0	0	0
HMF002782	HMF002782A	7243.23	0	0	0	0	0	0	0	0	0	0	0	0	0	0	0	1911.46	2574.12	0	0	0	0	0	0	0	0	0	0	0	0	0	0	0	0	0	0	0	0	0	2252.54	0	0	0	0	0	0	0	0
HMF000779	HMF000779A	6172.13	0	0	0	0	0	0	0	0	0	0	0	0	0	0	0	3871.96	363.949	0	0	0	0	0	0	0	0	0	0	0	0	0	0	0	0	0	688.903	0	0	0	2609.13	0	0	0	0	0	0	0	0
HMF003277	HMF003277A	9158.17	0	0	2314.31	0	0	0	0	0	0	0	0	0	0	0	0	2338.32	2090.68	0	0	0	0	0	0	0	0	0	0	0	0	0	0	0	0	0	7485.72	0	0	0	14712.8	0	0	0	0	0	0	0	0
HMF002933	HMF002933A	6478.07	0	0	0	0	0	0	0	0	0	0	0	0	0	0	0	1524.43	969.908	0	0	0	0	0	0	0	0	0	0	0	0	0	0	0	0	0	0	0	0	0	723.177	0	0	0	0	0	0	0	0
HMF000707	HMF000707A	4284.42	0	0	1581.46	0	0	0	0	0	0	0	0	0	0	0	0	9509.65	2771.16	0	0	0	0	0	0	0	0	0	0	0	0	0	0	0	0	0	959.228	0	0	0	3987.24	0	0	0	0	0	0	0	0
HMF002538	HMF002538A	3664.75	0	0	1093.91	0	0	0	0	0	0	0	0	0	0	0	0	5702.17	2387.85	0	0	0	0	0	0	0	0	0	0	0	0	0	0	0	0	0	1275.89	0	0	0	3351.42	0	0	0	0	0	0	0	0
HMF000379	HMF000379A	2053.94	0	0	1470.32	0	0	0	0	0	0	0	0	0	0	0	0	7925.69	3403.02	0	0	0	0	0	0	0	0	0	0	0	0	0	0	0	0	0	1903.65	0	0	0	1763.38	0	0	0	0	0	0	0	0
HMF001499	HMF001499A	4389.51	0	0	2702.12	0	0	0	0	0	0	0	0	0	0	0	0	3056.7	999.73	0	0	0	0	0	0	0	0	0	0	0	0	0	0	0	0	0	608.64	0	0	0	3424.29	0	0	0	0	0	0	0	0
HMF003757	HMF003757A	2606.81	0	0	1212.08	0	0	0	0	0	0	0	0	0	0	0	0	13789.2	1632.45	0	0	0	0	0	0	0	0	0	0	0	0	0	0	0	0	0	659.586	0	0	0	981.872	0	0	0	0	0	0	0	0
HMF001649	HMF001649A	6506.25	0	0	2311.99	0	0	0	0	0	0	0	0	0	0	0	0	520.66	917.9	0	0	0	0	0	0	0	0	0	0	0	0	0	0	0	0	0	1030.83	0	0	0	3175.93	0	0	0	0	0	0	0	0
HMF002111	HMF002111A	5930.49	0	0	410.103	0	0	0	0	0	0	0	0	0	0	0	0	1387.35	1001.75	0	0	0	0	0	0	0	0	0	0	0	0	0	0	0	0	0	577.145	0	0	0	635.16	0	0	0	0	0	0	0	0
HMF000104	HMF000104A	3533.17	0	0	0	0	0	0	0	0	0	0	0	0	0	0	0	10365.8	0	0	0	0	0	0	0	0	0	0	0	0	0	0	0	0	0	0	16282.6	0	0	0	21100.4	0	0	0	0	0	0	0	0
HMF001198	HMF001198A	9108.27	0	0	4076.82	0	0	0	0	0	0	0	0	0	0	0	0	2593.66	1598.06	0	0	0	0	0	0	0	0	0	0	0	0	0	0	0	0	0	2905.87	0	0	0	6826.33	0	0	0	0	0	0	0	0
HMF001302	HMF001302A	4618.5	0	0	483.92	0	0	0	0	0	0	0	0	0	0	0	0	6552.18	0	0	0	0	0	0	0	0	0	0	0	0	0	0	0	0	0	0	989.858	0	0	0	2038.77	0	0	0	0	0	0	0	0
HMF001500	HMF001500A	3812.97	0	0	1435.99	0	0	0	0	0	0	0	0	0	0	0	0	7150.44	3304.94	0	0	0	0	0	0	0	0	0	0	0	0	0	0	0	0	0	1870.45	0	0	0	3311.94	0	0	0	0	0	0	0	0
HMF002656	HMF002656A	6030.3	0	0	1237.59	0	0	0	0	0	0	0	0	0	0	0	0	2872.24	1493.98	0	0	0	0	0	0	0	0	0	0	0	0	0	0	0	0	0	642.487	0	0	0	4268.45	0	0	0	0	0	0	0	0
HMF000023	HMF000023A	4584.47	0	0	1299.43	0	0	0	0	0	0	0	0	0	0	0	0	4124.02	1719.92	0	0	0	0	0	0	0	0	0	0	0	0	0	0	0	0	0	750.095	0	0	0	1805.82	0	0	0	0	0	0	0	0
HMF000468	HMF000468A	2694.88	0	0	0	0	0	0	0	0	0	0	0	0	0	0	0	39685.8	0	0	0	0	0	0	0	0	0	0	0	0	0	0	0	0	0	0	685.35	0	0	0	0	0	0	0	0	0	0	0	0
HMF001121	HMF001121A	0	0	0	2337.62	0	0	0	0	0	569.774	0	0	0	0	0	0	0	8841.25	0	0	0	0	0	0	0	0	0	0	0	0	0	0	0	0	0	347.667	0	0	0	387.686	0	0	0	0	0	0	0	0
HMF003472	HMF003472A	5737.16	0	0	828.528	0	0	0	0	0	0	0	0	0	0	0	0	0	2446.06	0	0	0	0	0	0	0	0	0	0	0	0	0	0	0	0	0	0	0	0	0	811.518	0	0	0	0	0	0	0	0
HMF003235	HMF003235A	3611.11	0	0	343.175	0	0	0	0	0	0	0	0	0	0	0	0	3976.33	2457.34	0	0	0	0	0	0	0	0	0	0	0	0	0	0	0	0	0	552.087	0	0	0	0	0	0	0	0	0	0	0	0
HMF001279	HMF001279A	5286.45	0	0	1607.05	0	0	0	0	0	0	0	0	0	0	0	0	4850.66	3946.07	0	0	0	0	0	0	0	0	0	0	0	0	0	0	0	0	0	2275.48	0	0	0	9645.29	0	0	0	0	0	0	0	0
HMF001010	HMF001010A	5566.49	0	0	0	0	0	0	0	0	0	0	0	0	0	0	0	183.544	862.556	0	0	0	0	0	0	0	0	0	0	0	0	0	0	0	0	0	0	0	0	0	573.7	0	0	0	0	0	0	0	0
HMF002869	HMF002869A	9010.72	0	0	850.597	0	0	0	0	0	0	0	0	0	0	0	0	5030.9	3466.55	0	0	0	0	0	0	0	0	0	0	0	0	0	0	0	0	0	487.201	0	0	0	2372.85	0	0	0	0	0	0	0	0
HMF002480	HMF002480A	7347.93	0	0	1419.32	0	0	0	0	0	0	0	0	0	0	0	0	7493.62	8593.03	0	0	0	0	0	0	0	0	0	0	0	0	0	0	0	0	0	1636.1	0	0	0	0	0	0	0	0	0	0	0	0
HMF002395	HMF002395A	6714.85	0	0	0	0	0	0	0	0	0	0	0	0	0	0	0	877.483	758.782	0	0	0	0	0	0	0	0	0	0	0	0	0	0	0	0	0	1916.24	0	0	0	5571.41	0	0	0	0	0	0	0	0
HMF003030	HMF003030A	944.924	0	0	2697.14	0	0	0	0	0	0	0	0	0	0	0	0	11030.3	4141.05	0	0	0	0	0	0	0	0	0	0	0	0	0	0	0	0	0	2044.5	0	0	0	12906.1	0	0	0	0	0	0	0	0
HMF002990	HMF002990A	6552.05	0	0	625.819	0	0	0	0	0	0	0	0	0	0	0	0	2811.17	2285.64	0	0	0	0	0	0	0	0	0	0	0	0	0	0	0	0	0	545.085	0	0	0	1572.07	0	0	0	0	0	0	0	0
HMF001458	HMF001458B	6488.45	0	0	0	0	0	0	0	0	0	0	0	0	0	0	0	27226.9	2158.31	0	0	0	0	0	0	0	0	0	0	0	0	0	0	0	0	0	2191.84	0	0	0	2195.84	0	0	0	0	0	0	0	0
HMF001099	HMF001099A	52849.6	0	0	0	0	0	0	0	0	0	0	0	0	0	0	0	46462.6	0	0	0	0	0	0	0	0	0	0	0	0	0	0	0	0	0	0	83656.7	0	0	0	2920.42	0	0	0	0	0	0	0	0
HMF001651	HMF001651A	19141.8	0	0	6057.37	0	0	0	0	0	2226.11	0	0	0	0	0	0	8549.75	3573.97	0	0	0	0	0	0	0	0	0	0	0	0	0	0	0	0	0	95827.8	0	0	0	6183.26	0	0	0	0	0	0	0	0
HMF000020	HMF000020A	3126.65	0	0	1768.8	0	0	0	0	0	0	0	0	0	0	0	0	6499.78	9452.45	0	0	0	0	0	0	0	0	0	0	0	0	0	0	0	0	0	1597.82	0	0	0	9098.49	0	0	0	0	0	0	0	0
HMF000872	HMF000872B	22991.5	0	0	0	0	0	0	0	0	4053.44	0	0	0	0	0	0	17215.4	0	0	0	0	0	0	0	0	0	0	0	0	0	0	0	0	0	0	82923.1	0	0	0	0	0	0	0	0	0	0	0	0
HMF002864	HMF002864A	6326.71	0	0	543.702	0	0	0	0	0	0	0	0	0	0	0	0	1648.58	2567.23	0	0	0	0	0	0	0	0	0	0	0	0	0	0	0	0	0	690.986	0	0	0	2342.06	0	0	0	0	0	0	0	0
HMF002724	HMF002724A	29352.6	0	0	0	0	0	0	0	0	3445.01	0	0	0	0	0	0	4491.71	0	0	0	0	0	0	0	0	0	0	0	0	0	0	0	0	0	0	65784.1	0	0	0	2873.68	0	0	0	0	0	0	0	0
HMF003654	HMF003654A	3463.86	0	0	980.935	0	0	0	0	0	0	0	0	0	0	0	0	2996.47	2831.47	0	0	0	0	0	0	0	0	0	0	0	0	0	0	0	0	0	796.884	0	0	0	326.477	0	0	0	0	0	0	0	0
HMF002357	HMF002357A	1180.95	0	0	0	0	0	0	0	0	445.539	0	0	0	0	0	0	15734.1	672.55	0	0	0	0	0	0	0	0	0	0	0	0	0	0	0	0	0	1272.76	0	0	0	2365.9	0	0	0	0	0	0	0	0
HMF002017	HMF002017A	6581.57	0	0	1592.19	0	0	0	0	0	0	0	0	0	0	0	0	3162.86	1528.1	0	0	0	0	0	0	0	0	0	0	0	0	0	0	0	0	0	1182.13	0	0	0	3372.15	0	0	0	0	0	0	0	0
HMF004000	HMF004000A	35549.5	0	0	0	0	0	0	0	0	0	0	0	0	0	0	0	26309.4	3083.37	0	0	0	0	0	0	0	0	0	0	0	0	0	0	0	0	0	84856.9	0	0	0	0	0	0	0	0	0	0	0	0
HMF001832	HMF001832A	6427.49	0	0	1640.96	0	0	0	0	0	0	0	0	0	0	0	0	5715.28	1326.2	0	0	0	0	0	0	0	0	0	0	0	0	0	0	0	0	0	1109.67	0	0	0	4008.16	0	0	0	0	0	0	0	0
HMF001131	HMF001131A	2711.69	0	0	3524.35	0	0	0	0	0	0	0	0	0	0	0	0	16626.3	3914.44	0	0	0	0	0	0	0	0	0	0	0	0	0	0	0	0	0	2466.44	0	0	0	5252.06	0	0	0	0	0	0	0	0
HMF003265	HMF003265A	9842.41	0	0	1971.58	0	0	0	0	0	0	0	0	0	0	0	0	0	0	0	0	0	0	0	0	0	0	0	0	0	0	0	0	0	0	0	1088.72	0	0	0	9176.39	0	0	0	0	0	0	0	0
HMF001107	HMF001107A	55477.9	0	0	5415.77	0	0	0	0	0	7564.28	0	0	0	0	0	0	0	7296.34	0	0	0	0	0	0	0	0	0	0	0	0	0	0	0	0	0	72882.4	0	0	0	8098.15	0	0	0	0	0	0	0	0
HMF001413	HMF001413A	7411.5	0	0	0	0	0	0	0	0	0	0	0	0	0	0	0	748.601	1731.23	0	0	0	0	0	0	0	0	0	0	0	0	0	0	0	0	0	0	0	0	0	1002.63	0	0	0	0	0	0	0	0
HMF001371	HMF001371A	48863.8	0	0	0	0	0	0	0	0	0	0	0	0	0	0	0	21068.9	0	0	0	0	0	0	0	0	0	0	0	0	0	0	0	0	0	0	43154.5	0	0	0	0	0	0	0	0	0	0	0	0
HMF003387	HMF003387A	51747.7	0	0	0	0	0	0	0	0	0	0	0	0	0	0	0	18949	0	0	0	0	0	0	0	0	0	0	0	0	0	0	0	0	0	0	94219.8	0	0	0	10610.8	0	0	0	0	0	0	0	0
HMF002361	HMF002361A	3863.94	0	0	0	0	0	0	0	0	0	0	0	0	0	0	0	14533.3	2079.62	0	0	0	0	0	0	0	0	0	0	0	0	0	0	0	0	0	0	0	0	0	1145.6	0	0	0	0	0	0	0	0
HMF000628	HMF000628A	1921.06	0	0	4432.75	0	0	0	0	0	707.258	0	0	0	0	0	0	22121.7	3476.23	0	0	0	0	0	0	0	0	0	0	0	0	0	0	0	0	0	2883.59	0	0	0	4215.02	0	0	0	0	0	0	0	0
HMF002441	HMF002441A	4482.01	0	0	1244.59	0	0	0	0	0	0	0	0	0	0	0	0	8081.54	811.359	0	0	0	0	0	0	0	0	0	0	0	0	0	0	0	0	0	684.146	0	0	0	5288.36	0	0	0	0	0	0	0	0
HMF000512	HMF000512A	45341	0	0	0	0	0	0	0	0	1899.47	0	0	0	0	0	0	1727.2	1388.67	0	0	0	0	0	0	0	0	0	0	0	0	0	0	0	0	0	34291.2	0	0	0	1438.25	0	0	0	0	0	0	0	0
HMF000628	HMF000628B	1888.38	0	0	4475.89	0	0	0	0	0	629.962	0	0	0	0	0	0	24108.9	3449.51	0	0	0	0	0	0	0	0	0	0	0	0	0	0	0	0	0	3005.98	0	0	0	4572.11	0	0	0	0	0	0	0	0
HMF000523	HMF000523A	3908	0	0	1082	0	0	0	0	0	0	0	0	0	0	0	0	1532	1279.5	0	0	0	0	0	0	0	0	0	0	0	0	0	0	0	0	0	641.5	0	0	0	3341.5	0	0	0	0	0	0	0	0
HMF000112	HMF000112A	3546.48	0	0	0	0	0	0	0	0	0	0	0	0	0	0	0	17640.8	0	0	0	0	0	0	0	0	0	0	0	0	0	0	0	0	0	0	879.864	0	0	0	8093.45	0	0	0	0	0	0	0	0
HMF002628	HMF002628A	25192.3	0	0	5662.2	0	0	0	0	0	1631.25	0	0	0	0	0	0	7941.55	4791.4	0	0	0	0	0	0	0	0	0	0	0	0	0	0	0	0	0	72894	0	0	0	1602.29	0	0	0	0	0	0	0	0
HMF002810	HMF002810A	1388.28	0	0	2561.47	0	0	0	0	0	0	0	0	0	0	0	0	10798.4	3045.79	0	0	0	0	0	0	0	0	0	0	0	0	0	0	0	0	0	2794.61	0	0	0	7972.71	0	0	0	0	0	0	0	0
HMF001249	HMF001249A	5590.1	0	0	0	0	0	0	0	0	0	0	0	0	0	0	0	1300.86	0	0	0	0	0	0	0	0	0	0	0	0	0	0	0	0	0	0	300.737	0	0	0	6508.3	0	0	0	0	0	0	0	0
HMF001550	HMF001550B	8191.29	0	0	3309.04	0	0	0	0	0	0	0	0	0	0	0	0	9135.02	0	0	0	0	0	0	0	0	0	0	0	0	0	0	0	0	0	0	5468.7	0	0	0	27095.8	0	0	0	0	0	0	0	0
HMF002551	HMF002551A	36557.5	0	0	0	0	0	0	0	0	1612.28	0	0	0	0	0	0	17233.6	0	0	0	0	0	0	0	0	0	0	0	0	0	0	0	0	0	0	36007.6	0	0	0	2369.97	0	0	0	0	0	0	0	0
HMF002107	HMF002107A	3441.89	0	0	1096.42	0	0	0	0	0	0	0	0	0	0	0	0	3266.75	2067.24	0	0	0	0	0	0	0	0	0	0	0	0	0	0	0	0	0	1859.06	0	0	0	6049.59	0	0	0	0	0	0	0	0
HMF003369	HMF003369A	4608.85	0	0	0	0	0	0	0	0	0	0	0	0	0	0	0	10617.7	1614.67	0	0	0	0	0	0	0	0	0	0	0	0	0	0	0	0	0	829.603	0	0	0	1462.56	0	0	0	0	0	0	0	0
HMF001097	HMF001097A	6947.31	0	0	565.414	0	0	0	0	0	0	0	0	0	0	0	0	364.123	404.082	0	0	0	0	0	0	0	0	0	0	0	0	0	0	0	0	0	349.638	0	0	0	1991.44	0	0	0	0	0	0	0	0
HMF001379	HMF001379A	0	0	0	0	0	0	0	0	0	0	0	0	0	0	0	0	51938.5	0	0	0	0	0	0	0	0	0	0	0	0	0	0	0	0	0	0	3111.47	0	0	0	0	0	0	0	0	0	0	0	0
HMF001796	HMF001796A	4033.11	0	0	4685.34	0	0	0	0	0	0	0	0	0	0	0	0	4452.4	4341.69	0	0	0	0	0	0	0	0	0	0	0	0	0	0	0	0	0	2330.4	0	0	0	6128.06	0	0	0	0	0	0	0	0
HMF001432	HMF001432A	2680.3	0	0	3908.63	0	0	0	0	0	0	0	0	0	0	0	0	7895.8	3943.15	0	0	0	0	0	0	0	0	0	0	0	0	0	0	0	0	0	2178.96	0	0	0	4530.54	0	0	0	0	0	0	0	0
HMF001184	HMF001184A	922.494	0	0	1949.1	0	0	0	0	0	0	0	0	0	0	0	0	28922.2	2520.72	0	0	0	0	0	0	0	0	0	0	0	0	0	0	0	0	0	3503.27	0	0	0	1905.55	0	0	0	0	0	0	0	0
HMF000641	HMF000641A	10497.9	0	0	3037.82	0	0	0	0	0	0	0	0	0	0	0	0	329.48	0	0	0	0	0	0	0	0	0	0	0	0	0	0	0	0	0	0	1828.39	0	0	0	9246.44	0	0	0	0	0	0	0	0
HMF000596	HMF000596A	2666.78	0	0	2397.3	0	0	0	0	0	0	0	0	0	0	0	0	22586.2	4484.13	0	0	0	0	0	0	0	0	0	0	0	0	0	0	0	0	0	2067.33	0	0	0	2062.33	0	0	0	0	0	0	0	0
HMF000096	HMF000096A	0	0	0	2637.57	0	0	0	0	0	0	0	0	0	0	0	0	3319.11	1676.32	0	0	0	0	0	0	0	0	0	0	0	0	0	0	0	0	0	2910.29	0	0	0	26141.1	0	0	0	0	0	0	0	0
HMF002232	HMF002232A	3102.52	0	0	0	0	0	0	0	0	0	0	0	0	0	0	0	25874.2	5648.23	0	0	0	0	0	0	0	0	0	0	0	0	0	0	0	0	0	2755.01	0	0	0	0	0	0	0	0	0	0	0	0
HMF002148	HMF002148A	6224.71	0	0	2597.05	0	0	0	0	0	0	0	0	0	0	0	0	10666.6	0	0	0	0	0	0	0	0	0	0	0	0	0	0	0	0	0	0	2758.8	0	0	0	3419.33	0	0	0	0	0	0	0	0
HMF004031	HMF004031A	76638.3	0	0	0	0	0	0	0	0	5928.37	0	0	0	0	0	0	40519	0	0	0	0	0	0	0	0	0	0	0	0	0	0	0	0	0	0	92754.2	0	0	0	6615.48	0	0	0	0	0	0	0	0
HMF000498	HMF000498B	12808.8	0	0	0	0	28975.6	0	1914.36	1234.06	0	0	7931.08	0	5234.86	0	0	0	0	0	0	1268.57	0	0	0	1768.3	0	0	0	0	1781.3	0	0	0	0	0	0	0	0	0	0	0	0	0	0	0	0	0	0
HMF000732	HMF000732A	4274.76	2103.02	918.728	0	453.196	0	0	0	0	0	0	0	286.128	0	0	0	2759.85	10191.4	0	0	0	0	0	0	0	0	0	0	0	5981.88	0	0	0	0	0	0	0	0	0	0	0	0	0	0	0	0	0	0
HMF001562	HMF001562A	0	0	55841.5	0	27545.8	0	0	0	0	0	0	0	0	0	0	0	24612.9	0	0	0	0	0	0	0	0	0	0	0	0	0	0	0	0	0	0	0	0	0	0	0	0	0	0	0	0	0	0	0
HMF001892	HMF001892A	2618.64	688.058	1569.84	0	774.383	0	0	0	0	0	0	0	164.413	0	0	0	4888.89	1642.46	0	0	0	0	0	0	0	0	0	0	0	1319.31	0	0	0	0	0	0	0	0	0	0	0	0	0	0	0	0	0	0
HMF000344	HMF000344A	1868.14	2204.98	4058.47	0	2001.99	0	0	0	0	0	0	0	529.283	0	0	0	19119.4	4352.16	0	0	0	0	0	0	0	0	0	0	0	4206.32	0	0	0	0	0	0	0	0	0	0	0	0	0	0	0	0	0	0
HMF002378	HMF002378A	4324.66	1717.61	3517.28	0	1735.03	0	0	0	0	0	0	0	215.38	0	0	0	8334.77	1312.7	0	0	0	0	0	0	0	0	0	0	0	5050.57	0	0	0	0	0	0	0	0	0	0	0	0	0	0	0	0	0	0
HMF001003	HMF001003A	0	9065.17	4354.67	0	2148.1	0	0	0	0	0	0	0	3661.39	0	0	0	0	4569.34	0	0	0	0	0	0	0	0	0	0	0	3911.34	0	0	0	0	0	0	0	0	0	0	0	0	0	0	0	0	0	0
HMF003640	HMF003640A	844.498	3323.39	2404.34	0	1186.03	0	0	0	0	0	0	0	1355.79	0	0	0	0	1412.51	0	0	0	0	0	0	0	0	0	0	0	1312.44	0	0	0	0	0	0	0	0	0	0	0	0	0	0	0	0	0	0
HMF002443	HMF002443B	0	3040.51	8345.32	0	4116.64	0	0	0	0	0	0	0	1141.81	0	0	0	12076.3	1837.8	0	0	0	0	0	0	0	0	0	0	0	2088.87	0	0	0	0	0	0	0	0	0	0	0	0	0	0	0	0	0	0
HMF001397	HMF001397A	2537.29	2896.86	5828.42	0	2875.08	0	0	0	0	0	0	0	993.296	0	0	0	16274.4	4605.53	0	0	0	0	0	0	0	0	0	0	0	2842.12	0	0	0	0	0	0	0	0	0	0	0	0	0	0	0	0	0	0
HMF000481	HMF000481A	713.287	3483.94	4953.49	0	2443.49	0	0	0	0	0	0	0	1148.93	0	0	0	19967.5	682.775	0	0	0	0	0	0	0	0	0	0	0	3829.54	0	0	0	0	0	0	0	0	0	0	0	0	0	0	0	0	0	0
HMF001439	HMF001439A	311.845	568.11	2587.76	0	1276.51	0	0	0	0	0	0	0	62.4638	0	0	0	295.827	836.925	0	0	0	0	0	0	0	0	0	0	0	1749.56	0	0	0	0	0	0	0	0	0	0	0	0	0	0	0	0	0	0
HMF000357	HMF000357A	850.573	770.051	2552.82	0	1259.27	0	0	0	0	0	0	0	295.176	0	0	0	0	530.234	0	0	0	0	0	0	0	0	0	0	0	474.999	0	0	0	0	0	0	0	0	0	0	0	0	0	0	0	0	0	0
HMF003385	HMF003385A	1111.33	4001.99	3353.5	0	1654.24	0	0	0	0	0	0	0	1489.96	0	0	0	2025.73	1929.5	0	0	0	0	0	0	0	0	0	0	0	2865.74	0	0	0	0	0	0	0	0	0	0	0	0	0	0	0	0	0	0
HMF000774	HMF000774A	1331.64	2579.18	5511.45	0	2718.72	0	0	0	0	0	0	0	517.184	0	0	0	31733.5	1547	0	0	0	0	0	0	0	0	0	0	0	5838.36	0	0	0	0	0	0	0	0	0	0	0	0	0	0	0	0	0	0
HMF002948	HMF002948A	3711.39	983.718	2718.98	0	1341.23	0	0	0	0	0	0	0	161.347	0	0	0	7965.78	3009.25	0	0	0	0	0	0	0	0	0	0	0	2550.31	0	0	0	0	0	0	0	0	0	0	0	0	0	0	0	0	0	0
HMF002490	HMF002490A	2543.46	1780.21	3806.03	0	1877.46	0	0	0	0	0	0	0	804.284	0	0	0	0	1578.02	0	0	0	0	0	0	0	0	0	0	0	0	0	0	0	0	0	0	0	0	0	0	0	0	0	0	0	0	0	0
HMF003491	HMF003491A	1663.79	1660.07	0	0	0	0	0	0	0	0	0	0	315.893	0	0	0	60753.5	4559.91	0	0	0	0	0	0	0	0	0	0	0	3910.88	0	0	0	0	0	0	0	0	0	0	0	0	0	0	0	0	0	0
HMF001074	HMF001074A	3232.94	833.714	2451.87	0	1209.47	0	0	0	0	0	0	0	0	0	0	0	10822.2	2996.78	0	0	0	0	0	0	0	0	0	0	0	3393.33	0	0	0	0	0	0	0	0	0	0	0	0	0	0	0	0	0	0
HMF001329	HMF001329A	2806.65	2279.42	6384.11	0	3149.2	0	0	0	0	0	0	0	705.71	0	0	0	17355.3	3549.72	0	0	0	0	0	0	0	0	0	0	0	2919.89	0	0	0	0	0	0	0	0	0	0	0	0	0	0	0	0	0	0
HMF003608	HMF003608A	5865.6	759.02	877.278	0	432.749	0	0	0	0	0	0	0	230.777	0	0	0	0	1970.04	0	0	0	0	0	0	0	0	0	0	0	1010.27	0	0	0	0	0	0	0	0	0	0	0	0	0	0	0	0	0	0
HMF000177	HMF000177A	4717.05	861.322	586.91	0	289.515	0	0	0	0	0	0	0	389.137	0	0	0	8758.23	5297.66	0	0	0	0	0	0	0	0	0	0	0	0	0	0	0	0	0	0	0	0	0	0	0	0	0	0	0	0	0	0
HMF003222	HMF003222A	3026.68	731.362	1523.58	0	751.56	0	0	0	0	0	0	0	83.7719	0	0	0	5771.65	1868.34	0	0	0	0	0	0	0	0	0	0	0	2222.05	0	0	0	0	0	0	0	0	0	0	0	0	0	0	0	0	0	0
HMF001831	HMF001831A	2089.06	1438.9	3566.07	0	1759.09	0	0	0	0	0	0	0	499.484	0	0	0	4720.14	1482.54	0	0	0	0	0	0	0	0	0	0	0	1356.72	0	0	0	0	0	0	0	0	0	0	0	0	0	0	0	0	0	0
HMF002001	HMF002001A	1716.42	3418.86	1647.72	0	812.796	0	0	0	0	0	0	0	1261.46	0	0	0	1381.82	0	0	0	0	0	0	0	0	0	0	0	0	2550.9	0	0	0	0	0	0	0	0	0	0	0	0	0	0	0	0	0	0
HMF000103	HMF000103A	3631.13	1045.11	1538.94	0	759.14	0	0	0	0	0	0	0	155.603	0	0	0	2582.59	1322.55	0	0	0	0	0	0	0	0	0	0	0	2851.93	0	0	0	0	0	0	0	0	0	0	0	0	0	0	0	0	0	0
HMF003681	HMF003681A	6673.4	1010.13	0	0	0	0	0	0	0	0	0	0	276.513	0	0	0	42656.5	1425.19	0	0	0	0	0	0	0	0	0	0	0	1620.29	0	0	0	0	0	0	0	0	0	0	0	0	0	0	0	0	0	0
HMF002117	HMF002117A	2712.54	1012.85	2512.14	0	1239.21	0	0	0	0	0	0	0	321.714	0	0	0	1496.33	2514.09	0	0	0	0	0	0	0	0	0	0	0	1224.13	0	0	0	0	0	0	0	0	0	0	0	0	0	0	0	0	0	0
HMF001257	HMF001257A	3278.6	2277.75	4143.78	0	2044.07	0	0	0	0	0	0	0	317.439	0	0	0	32084.8	6770.61	0	0	0	0	0	0	0	0	0	0	0	6410.96	0	0	0	0	0	0	0	0	0	0	0	0	0	0	0	0	0	0
HMF002054	HMF002054A	2001.79	526.792	1112.31	0	548.687	0	0	0	0	0	0	0	141.198	0	0	0	20873.9	1256.24	0	0	0	0	0	0	0	0	0	0	0	872.081	0	0	0	0	0	0	0	0	0	0	0	0	0	0	0	0	0	0
HMF001527	HMF001527A	3853.16	846.197	2717.16	0	1340.34	0	0	0	0	0	0	0	0	0	0	0	18182.1	2038	0	0	0	0	0	0	0	0	0	0	0	3444.14	0	0	0	0	0	0	0	0	0	0	0	0	0	0	0	0	0	0
HMF000692	HMF000692A	2147.5	1475.62	3613.33	0	1782.41	0	0	0	0	0	0	0	452.271	0	0	0	13042	1585.37	0	0	0	0	0	0	0	0	0	0	0	1931.5	0	0	0	0	0	0	0	0	0	0	0	0	0	0	0	0	0	0
HMF002908	HMF002908B	1173.77	1804.88	3141.12	0	1549.47	0	0	0	0	0	0	0	579.984	0	0	0	39586.6	0	0	0	0	0	0	0	0	0	0	0	0	2121.1	0	0	0	0	0	0	0	0	0	0	0	0	0	0	0	0	0	0
HMF001374	HMF001374A	832.426	1890.04	3758.08	0	1853.81	0	0	0	0	0	0	0	469.95	0	0	0	7725.89	1962.79	0	0	0	0	0	0	0	0	0	0	0	3459	0	0	0	0	0	0	0	0	0	0	0	0	0	0	0	0	0	0
HMF001677	HMF001677A	1549.91	475.579	3824.99	0	1886.82	0	0	0	0	0	0	0	0	0	0	0	13775.4	2528.09	0	0	0	0	0	0	0	0	0	0	0	1935.67	0	0	0	0	0	0	0	0	0	0	0	0	0	0	0	0	0	0
HMF002634	HMF002634B	0	14409.7	3042.3	0	1500.73	0	0	0	0	0	0	0	6510.16	0	0	0	0	0	0	0	0	0	0	0	0	0	0	0	0	0	0	0	0	0	0	0	0	0	0	0	0	0	0	0	0	0	0	0
HMF000811	HMF000811B	0	29867.5	2928.17	0	1444.43	0	0	0	0	0	0	0	13493.9	0	0	0	0	0	0	0	0	0	0	0	0	0	0	0	0	0	0	0	0	0	0	0	0	0	0	0	0	0	0	0	0	0	0	0
HMF003402	HMF003402A	0	2526.16	2399.67	0	1183.72	0	0	0	0	0	0	0	823.369	0	0	0	0	1646.63	0	0	0	0	0	0	0	0	0	0	0	2864.16	0	0	0	0	0	0	0	0	0	0	0	0	0	0	0	0	0	0
HMF001895	HMF001895A	0	8346.81	23094	0	11392	0	0	0	0	0	0	0	3181.1	0	0	0	0	30578.7	0	0	0	0	0	0	0	0	0	0	0	5314.44	0	0	0	0	0	0	0	0	0	0	0	0	0	0	0	0	0	0
HMF001937	HMF001937A	2506.25	1672.65	3055.01	0	1506.99	0	0	0	0	0	0	0	415.279	0	0	0	0	1198.81	0	0	0	0	0	0	0	0	0	0	0	3066.72	0	0	0	0	0	0	0	0	0	0	0	0	0	0	0	0	0	0
HMF001365	HMF001365A	6774.71	1237.99	465.887	0	229.816	0	0	0	0	0	0	0	226.007	0	0	0	33959.7	692.196	0	0	0	0	0	0	0	0	0	0	0	3002.72	0	0	0	0	0	0	0	0	0	0	0	0	0	0	0	0	0	0
HMF002024	HMF002024A	3228.14	2044.83	5258.2	0	2593.8	0	0	0	0	0	0	0	638.587	0	0	0	12990.1	6079.59	0	0	0	0	0	0	0	0	0	0	0	2569.76	0	0	0	0	0	0	0	0	0	0	0	0	0	0	0	0	0	0
HMF000704	HMF000704A	2072.54	1902.53	1256.49	0	619.809	0	0	0	0	0	0	0	557.723	0	0	0	5654.93	1132.89	0	0	0	0	0	0	0	0	0	0	0	2719.09	0	0	0	0	0	0	0	0	0	0	0	0	0	0	0	0	0	0
HMF003226	HMF003226A	1531.19	1680.01	1283.24	0	633.004	0	0	0	0	0	0	0	551.761	0	0	0	12938.5	838.199	0	0	0	0	0	0	0	0	0	0	0	1867.1	0	0	0	0	0	0	0	0	0	0	0	0	0	0	0	0	0	0
HMF000038	HMF000038A	3838.99	1652.08	2445.63	0	1206.39	0	0	0	0	0	0	0	217.653	0	0	0	40518.7	2341.19	0	0	0	0	0	0	0	0	0	0	0	4763.39	0	0	0	0	0	0	0	0	0	0	0	0	0	0	0	0	0	0
HMF002953	HMF002953A	980.707	658.811	444.663	0	219.346	0	0	0	0	0	0	0	137.133	0	0	0	0	179.679	0	0	0	0	0	0	0	0	0	0	0	1446.03	0	0	0	0	0	0	0	0	0	0	0	0	0	0	0	0	0	0
HMF000958	HMF000958A	2176.29	3801.46	6933.21	0	3420.06	0	0	0	0	0	0	0	1556.98	0	0	0	6212.06	1201.33	0	0	0	0	0	0	0	0	0	0	0	1445.78	0	0	0	0	0	0	0	0	0	0	0	0	0	0	0	0	0	0
HMF000824	HMF000824A	1380.88	849.371	1723.42	0	850.139	0	0	0	0	0	0	0	201.657	0	0	0	5044.27	2667.91	0	0	0	0	0	0	0	0	0	0	0	1640.35	0	0	0	0	0	0	0	0	0	0	0	0	0	0	0	0	0	0
HMF003148	HMF003148A	1605.87	930.029	3838.72	0	1893.59	0	0	0	0	0	0	0	240.086	0	0	0	2560.01	635.261	0	0	0	0	0	0	0	0	0	0	0	1622.44	0	0	0	0	0	0	0	0	0	0	0	0	0	0	0	0	0	0
HMF000406	HMF000406A	2604.6	409.197	2657.83	0	1311.07	0	0	0	0	0	0	0	0	0	0	0	22861	1322.8	0	0	0	0	0	0	0	0	0	0	0	1665.49	0	0	0	0	0	0	0	0	0	0	0	0	0	0	0	0	0	0
HMF000334	HMF000334A	7461.76	925.59	1761.81	0	869.077	0	0	0	0	0	0	0	305.834	0	0	0	23167.6	891.292	0	0	0	0	0	0	0	0	0	0	0	1012.05	0	0	0	0	0	0	0	0	0	0	0	0	0	0	0	0	0	0
HMF001078	HMF001078A	1106.94	897.371	3575.74	0	1763.87	0	0	0	0	0	0	0	0	0	0	0	7793.08	4012.58	0	0	0	0	0	0	0	0	0	0	0	3652.42	0	0	0	0	0	0	0	0	0	0	0	0	0	0	0	0	0	0
HMF001609	HMF001609A	3179.12	965.397	1166.95	0	575.643	0	0	0	0	0	0	0	93.3855	0	0	0	6350.74	2709.76	0	0	0	0	0	0	0	0	0	0	0	3088	0	0	0	0	0	0	0	0	0	0	0	0	0	0	0	0	0	0
HMF000993	HMF000993A	3991.8	484.786	888.706	0	438.386	0	0	0	0	0	0	0	110.774	0	0	0	0	467.265	0	0	0	0	0	0	0	0	0	0	0	975.191	0	0	0	0	0	0	0	0	0	0	0	0	0	0	0	0	0	0
HMF001845	HMF001845A	2885.11	1404.9	2767.46	0	1365.15	0	0	0	0	0	0	0	208.367	0	0	0	2768.93	3205.13	0	0	0	0	0	0	0	0	0	0	0	3840.96	0	0	0	0	0	0	0	0	0	0	0	0	0	0	0	0	0	0
HMF003490	HMF003490A	4168.57	864.991	2460.89	0	1213.93	0	0	0	0	0	0	0	0	0	0	0	21492	2267.25	0	0	0	0	0	0	0	0	0	0	0	3520.63	0	0	0	0	0	0	0	0	0	0	0	0	0	0	0	0	0	0
HMF000157	HMF000157A	2044.72	1832	3986.18	0	1966.33	0	0	0	0	0	0	0	327.186	0	0	0	9756.71	1710.94	0	0	0	0	0	0	0	0	0	0	0	4508.92	0	0	0	0	0	0	0	0	0	0	0	0	0	0	0	0	0	0
HMF000924	HMF000924A	931.123	572.754	781.351	0	385.43	0	0	0	0	0	0	0	0	0	0	0	57542.5	1471.98	0	0	0	0	0	0	0	0	0	0	0	2331.19	0	0	0	0	0	0	0	0	0	0	0	0	0	0	0	0	0	0
HMF001315	HMF001315A	1672.71	1086.39	4049.98	0	1997.8	0	0	0	0	0	0	0	216.153	0	0	0	9425.7	2548.83	0	0	0	0	0	0	0	0	0	0	0	2474.44	0	0	0	0	0	0	0	0	0	0	0	0	0	0	0	0	0	0
HMF002192	HMF002192A	0	4780.25	5948.85	0	2934.49	0	0	0	0	0	0	0	1804.5	0	0	0	0	2949.78	0	0	0	0	0	0	0	0	0	0	0	3199.71	0	0	0	0	0	0	0	0	0	0	0	0	0	0	0	0	0	0
HMF003091	HMF003091A	2747.31	889.101	3512.51	0	1732.67	0	0	0	0	0	0	0	0	0	0	0	3778.05	7242.17	0	0	0	0	0	0	0	0	0	0	0	3618.76	0	0	0	0	0	0	0	0	0	0	0	0	0	0	0	0	0	0
HMF003173	HMF003173A	2722.98	309.505	1551.33	0	765.251	0	0	0	0	0	0	0	139.832	0	0	0	17048.8	1357.5	0	0	0	0	0	0	0	0	0	0	0	0	0	0	0	0	0	0	0	0	0	0	0	0	0	0	0	0	0	0
HMF003778	HMF003778A	3562.14	868.033	1997.97	0	985.574	0	0	0	0	0	0	0	302.791	0	0	0	13434.7	557.57	0	0	0	0	0	0	0	0	0	0	0	805.195	0	0	0	0	0	0	0	0	0	0	0	0	0	0	0	0	0	0
HMF000420	HMF000420A	2539.24	2184.51	3427.39	0	1690.68	0	0	0	0	0	0	0	865.836	0	0	0	371.339	805.321	0	0	0	0	0	0	0	0	0	0	0	1091.02	0	0	0	0	0	0	0	0	0	0	0	0	0	0	0	0	0	0
HMF002530	HMF002530A	2477.62	1056.34	4195.79	0	2069.73	0	0	0	0	0	0	0	262.347	0	0	0	47336.2	2687.01	0	0	0	0	0	0	0	0	0	0	0	1936	0	0	0	0	0	0	0	0	0	0	0	0	0	0	0	0	0	0
HMF001975	HMF001975A	1087.54	4373.09	3723.07	0	1836.54	0	0	0	0	0	0	0	1422	0	0	0	22823.4	1772.94	0	0	0	0	0	0	0	0	0	0	0	4988.42	0	0	0	0	0	0	0	0	0	0	0	0	0	0	0	0	0	0
HMF003256	HMF003256A	958.849	603.053	2174.37	0	1072.59	0	0	0	0	0	0	0	109.03	0	0	0	431.056	729.788	0	0	0	0	0	0	0	0	0	0	0	1472.27	0	0	0	0	0	0	0	0	0	0	0	0	0	0	0	0	0	0
HMF002772	HMF002772A	2983.17	484.865	2368.68	0	1168.44	0	0	0	0	0	0	0	117.619	0	0	0	7844.64	2297.75	0	0	0	0	0	0	0	0	0	0	0	913.849	0	0	0	0	0	0	0	0	0	0	0	0	0	0	0	0	0	0
HMF001847	HMF001847A	3145.29	1029.95	3794.6	0	1871.82	0	0	0	0	0	0	0	374.292	0	0	0	17898.2	4575.78	0	0	0	0	0	0	0	0	0	0	0	820.08	0	0	0	0	0	0	0	0	0	0	0	0	0	0	0	0	0	0
HMF000426	HMF000426A	3583.01	508.214	1321.17	0	651.713	0	0	0	0	0	0	0	74.5835	0	0	0	6148.8	2048.93	0	0	0	0	0	0	0	0	0	0	0	1396.59	0	0	0	0	0	0	0	0	0	0	0	0	0	0	0	0	0	0
HMF003095	HMF003095A	2557.53	1711.01	3462.94	0	1708.22	0	0	0	0	0	0	0	379.397	0	0	0	12211.6	1234.19	0	0	0	0	0	0	0	0	0	0	0	3546.08	0	0	0	0	0	0	0	0	0	0	0	0	0	0	0	0	0	0
HMF001115	HMF001115A	4731.68	1069.95	2327.87	0	1148.31	0	0	0	0	0	0	0	201.741	0	0	0	4277.64	2018.42	0	0	0	0	0	0	0	0	0	0	0	2537.38	0	0	0	0	0	0	0	0	0	0	0	0	0	0	0	0	0	0
HMF003214	HMF003214A	2344.76	953.878	1916.6	0	945.432	0	0	0	0	0	0	0	247.698	0	0	0	8614.16	3886.55	0	0	0	0	0	0	0	0	0	0	0	1650.93	0	0	0	0	0	0	0	0	0	0	0	0	0	0	0	0	0	0
HMF001803	HMF001803A	0	3550.77	3830.56	0	1889.56	0	0	0	0	0	0	0	1327.7	0	0	0	0	808.936	0	0	0	0	0	0	0	0	0	0	0	2491.06	0	0	0	0	0	0	0	0	0	0	0	0	0	0	0	0	0	0
HMF001858	HMF001858A	1745.17	1008.3	2680.65	0	1322.33	0	0	0	0	0	0	0	208.449	0	0	0	623.276	1664.57	0	0	0	0	0	0	0	0	0	0	0	2226.03	0	0	0	0	0	0	0	0	0	0	0	0	0	0	0	0	0	0
HMF001984	HMF001984A	4976.09	1181.77	1786.39	0	881.204	0	0	0	0	0	0	0	268.913	0	0	0	8430.12	1755.16	0	0	0	0	0	0	0	0	0	0	0	2387.35	0	0	0	0	0	0	0	0	0	0	0	0	0	0	0	0	0	0
HMF002296	HMF002296A	4554.72	1385.35	1717.77	0	847.352	0	0	0	0	0	0	0	196.185	0	0	0	10216.1	3563.41	0	0	0	0	0	0	0	0	0	0	0	3871.15	0	0	0	0	0	0	0	0	0	0	0	0	0	0	0	0	0	0
HMF001926	HMF001926A	4210.72	1345.34	1980.2	0	976.807	0	0	0	0	0	0	0	146.91	0	0	0	3478.1	1175.7	0	0	0	0	0	0	0	0	0	0	0	4152.22	0	0	0	0	0	0	0	0	0	0	0	0	0	0	0	0	0	0
HMF001670	HMF001670A	3227.57	864.799	2034.11	0	1003.4	0	0	0	0	0	0	0	235.653	0	0	0	9186.04	1677.56	0	0	0	0	0	0	0	0	0	0	0	1396.88	0	0	0	0	0	0	0	0	0	0	0	0	0	0	0	0	0	0
HMF001406	HMF001406A	3048.94	2360.92	1080.3	0	532.899	0	0	0	0	0	0	0	938.704	0	0	0	542.4	829.847	0	0	0	0	0	0	0	0	0	0	0	1152.56	0	0	0	0	0	0	0	0	0	0	0	0	0	0	0	0	0	0
HMF000722	HMF000722A	2490.08	866.403	1342.49	0	662.231	0	0	0	0	0	0	0	115.685	0	0	0	8823.66	1842.27	0	0	0	0	0	0	0	0	0	0	0	2484.19	0	0	0	0	0	0	0	0	0	0	0	0	0	0	0	0	0	0
HMF003286	HMF003286A	4899.23	1008.16	1639.41	0	808.7	0	0	0	0	0	0	0	387.069	0	0	0	29566.9	970.243	0	0	0	0	0	0	0	0	0	0	0	616.278	0	0	0	0	0	0	0	0	0	0	0	0	0	0	0	0	0	0
HMF002105	HMF002105A	2024.51	3596.87	6547.17	0	3229.63	0	0	0	0	0	0	0	853.001	0	0	0	36879	1550.66	0	0	0	0	0	0	0	0	0	0	0	6955.14	0	0	0	0	0	0	0	0	0	0	0	0	0	0	0	0	0	0
HMF003742	HMF003742A	1457.89	1153.76	3747.33	0	1848.51	0	0	0	0	0	0	0	372.22	0	0	0	3968.94	1400.71	0	0	0	0	0	0	0	0	0	0	0	1342.65	0	0	0	0	0	0	0	0	0	0	0	0	0	0	0	0	0	0
HMF003587	HMF003587A	0	22824.9	4008.06	0	1977.12	0	0	0	0	0	0	0	10312.1	0	0	0	0	0	0	0	0	0	0	0	0	0	0	0	0	0	0	0	0	0	0	0	0	0	0	0	0	0	0	0	0	0	0	0
HMF003333	HMF003333A	1390.67	3931.54	17145.5	0	8457.67	0	0	0	0	0	0	0	1544.97	0	0	0	30277.8	2213.28	0	0	0	0	0	0	0	0	0	0	0	2083.44	0	0	0	0	0	0	0	0	0	0	0	0	0	0	0	0	0	0
HMF000605	HMF000605A	0	4434.75	3905.64	0	1926.6	0	0	0	0	0	0	0	1949.31	0	0	0	367.232	454.668	0	0	0	0	0	0	0	0	0	0	0	488.929	0	0	0	0	0	0	0	0	0	0	0	0	0	0	0	0	0	0
HMF002370	HMF002370A	2563.48	3428.76	1681.28	0	829.35	0	0	0	0	0	0	0	1088.54	0	0	0	918.485	0	0	0	0	0	0	0	0	0	0	0	0	4148.98	0	0	0	0	0	0	0	0	0	0	0	0	0	0	0	0	0	0
HMF000863	HMF000863A	31572.1	1906.71	14401.9	0	7104.27	0	0	0	0	0	0	0	0	0	0	0	25219.3	7554.17	0	0	0	0	0	0	0	0	0	0	0	7760.57	0	0	0	0	0	0	0	0	0	0	0	0	0	0	0	0	0	0
HMF002913	HMF002913A	3868.51	1778.11	8877.87	0	4379.33	0	0	0	0	0	0	0	363.894	0	0	0	19959.2	2998.25	0	0	0	0	0	0	0	0	0	0	0	3958.85	0	0	0	0	0	0	0	0	0	0	0	0	0	0	0	0	0	0
HMF002020	HMF002020A	2464.88	386.48	2528.01	0	1247.03	0	0	0	0	0	0	0	0	0	0	0	8394.88	3108.22	0	0	0	0	0	0	0	0	0	0	0	1573.03	0	0	0	0	0	0	0	0	0	0	0	0	0	0	0	0	0	0
HMF003311	HMF003311A	1316.21	516.004	1511.1	0	745.404	0	0	0	0	0	0	0	138.976	0	0	0	987.908	499.217	0	0	0	0	0	0	0	0	0	0	0	848.184	0	0	0	0	0	0	0	0	0	0	0	0	0	0	0	0	0	0
HMF000695	HMF000695A	4027.59	2988.89	1335.52	0	658.795	0	0	0	0	0	0	0	833.558	0	0	0	7361.44	1879.44	0	0	0	0	0	0	0	0	0	0	0	4655.76	0	0	0	0	0	0	0	0	0	0	0	0	0	0	0	0	0	0
HMF000500	HMF000500B	1674.34	3672.35	5037.72	0	2485.04	0	0	0	0	0	0	0	852.479	0	0	0	17722.4	1320.66	0	0	0	0	0	0	0	0	0	0	0	7267.06	0	0	0	0	0	0	0	0	0	0	0	0	0	0	0	0	0	0
HMF001663	HMF001663B	2266.38	17829.9	2093.96	0	1032.92	0	0	0	0	0	0	0	7920.87	0	0	0	8490.67	1913.29	0	0	0	0	0	0	0	0	0	0	0	1211.98	0	0	0	0	0	0	0	0	0	0	0	0	0	0	0	0	0	0
HMF001823	HMF001823A	2197.56	1437.93	2168.61	0	1069.75	0	0	0	0	0	0	0	327.312	0	0	0	16289.3	1212.76	0	0	0	0	0	0	0	0	0	0	0	2903.83	0	0	0	0	0	0	0	0	0	0	0	0	0	0	0	0	0	0
HMF000717	HMF000717A	2092.39	1951.63	4219.96	0	2081.65	0	0	0	0	0	0	0	831.507	0	0	0	5800.84	793.562	0	0	0	0	0	0	0	0	0	0	0	452.458	0	0	0	0	0	0	0	0	0	0	0	0	0	0	0	0	0	0
HMF000084	HMF000084A	4025.23	1033.68	3242.22	0	1599.34	0	0	0	0	0	0	0	216.727	0	0	0	9187.03	5495.03	0	0	0	0	0	0	0	0	0	0	0	2254.74	0	0	0	0	0	0	0	0	0	0	0	0	0	0	0	0	0	0
HMF002437	HMF002437A	3897.85	904.678	2107.23	0	1039.47	0	0	0	0	0	0	0	217.245	0	0	0	3859.81	3720.69	0	0	0	0	0	0	0	0	0	0	0	1725.02	0	0	0	0	0	0	0	0	0	0	0	0	0	0	0	0	0	0
HMF003559	HMF003559A	2600.74	862.311	1891.41	0	933.007	0	0	0	0	0	0	0	238.808	0	0	0	3005.15	3978.25	0	0	0	0	0	0	0	0	0	0	0	1358.32	0	0	0	0	0	0	0	0	0	0	0	0	0	0	0	0	0	0
HMF002528	HMF002528A	1292.68	1638.56	2138.07	0	1054.68	0	0	0	0	0	0	0	196.165	0	0	0	19311.3	3839.59	0	0	0	0	0	0	0	0	0	0	0	4901.92	0	0	0	0	0	0	0	0	0	0	0	0	0	0	0	0	0	0
HMF001862	HMF001862A	3921.38	763.148	2036.12	0	1004.39	0	0	0	0	0	0	0	185.656	0	0	0	8550.97	4319.78	0	0	0	0	0	0	0	0	0	0	0	1433.56	0	0	0	0	0	0	0	0	0	0	0	0	0	0	0	0	0	0
HMF003523	HMF003523A	0	1729.96	3978.98	0	1962.78	0	0	0	0	0	0	0	0	0	0	0	92525.4	0	0	0	0	0	0	0	0	0	0	0	0	7041.17	0	0	0	0	0	0	0	0	0	0	0	0	0	0	0	0	0	0
HMF001532	HMF001532A	2061.1	712.812	1621.5	0	799.862	0	0	0	0	0	0	0	121.595	0	0	0	7927.13	2649.2	0	0	0	0	0	0	0	0	0	0	0	1805.8	0	0	0	0	0	0	0	0	0	0	0	0	0	0	0	0	0	0
HMF000858	HMF000858A	6787.65	1308.31	3040.35	0	1499.76	0	0	0	0	0	0	0	174.312	0	0	0	8731.13	3431.84	0	0	0	0	0	0	0	0	0	0	0	3754.65	0	0	0	0	0	0	0	0	0	0	0	0	0	0	0	0	0	0
HMF000393	HMF000393A	1631.64	1829.09	3984.02	0	1965.27	0	0	0	0	0	0	0	549.242	0	0	0	4869.88	1029.3	0	0	0	0	0	0	0	0	0	0	0	2496.56	0	0	0	0	0	0	0	0	0	0	0	0	0	0	0	0	0	0
HMF001664	HMF001664A	2417.95	542.956	2718.46	0	1340.98	0	0	0	0	0	0	0	123.463	0	0	0	6483.39	1955.17	0	0	0	0	0	0	0	0	0	0	0	1097.64	0	0	0	0	0	0	0	0	0	0	0	0	0	0	0	0	0	0
HMF001300	HMF001300A	3238.75	696.961	1260.82	0	621.945	0	0	0	0	0	0	0	0	0	0	0	35684.9	4483.08	0	0	0	0	0	0	0	0	0	0	0	2836.73	0	0	0	0	0	0	0	0	0	0	0	0	0	0	0	0	0	0
HMF002121	HMF002121A	3136	822.484	1454.2	0	717.337	0	0	0	0	0	0	0	111.231	0	0	0	11386.8	1664.35	0	0	0	0	0	0	0	0	0	0	0	2345.56	0	0	0	0	0	0	0	0	0	0	0	0	0	0	0	0	0	0
HMF002987	HMF002987A	4131.26	597.49	1128.02	0	556.436	0	0	0	0	0	0	0	215.489	0	0	0	3611.54	1285.06	0	0	0	0	0	0	0	0	0	0	0	490.552	0	0	0	0	0	0	0	0	0	0	0	0	0	0	0	0	0	0
HMF002215	HMF002215A	1697.45	2412.44	4044.46	0	1995.08	0	0	0	0	0	0	0	1089.92	0	0	0	11282.3	475.345	0	0	0	0	0	0	0	0	0	0	0	0	0	0	0	0	0	0	0	0	0	0	0	0	0	0	0	0	0	0
HMF001081	HMF001081A	3341.47	1131.2	1659.5	0	818.609	0	0	0	0	0	0	0	163.196	0	0	0	26125.4	4961.72	0	0	0	0	0	0	0	0	0	0	0	3133.91	0	0	0	0	0	0	0	0	0	0	0	0	0	0	0	0	0	0
HMF002408	HMF002408A	716.367	14262.1	356.693	0	175.952	0	0	0	0	0	0	0	6038.75	0	0	0	0	0	0	0	0	0	0	0	0	0	0	0	0	3646.16	0	0	0	0	0	0	0	0	0	0	0	0	0	0	0	0	0	0
HMF002575	HMF002575A	5089.8	255.035	1745.21	0	860.891	0	0	0	0	0	0	0	0	0	0	0	13507.7	1388.99	0	0	0	0	0	0	0	0	0	0	0	1038.03	0	0	0	0	0	0	0	0	0	0	0	0	0	0	0	0	0	0
HMF004252	HMF004252A	2028.5	2762.14	1798.72	0	887.286	0	0	0	0	0	0	0	1002.24	0	0	0	6366.78	2511.14	0	0	0	0	0	0	0	0	0	0	0	2213.19	0	0	0	0	0	0	0	0	0	0	0	0	0	0	0	0	0	0
HMF000433	HMF000433A	1717.56	793.234	384.844	0	189.838	0	0	0	0	0	0	0	160.97	0	0	0	1623.19	378.961	0	0	0	0	0	0	0	0	0	0	0	1778.41	0	0	0	0	0	0	0	0	0	0	0	0	0	0	0	0	0	0
HMF000240	HMF000240A	2145.28	267.914	1109.52	0	547.311	0	0	0	0	0	0	0	0	0	0	0	23003.6	571.441	0	0	0	0	0	0	0	0	0	0	0	1090.45	0	0	0	0	0	0	0	0	0	0	0	0	0	0	0	0	0	0
HMF000182	HMF000182A	5108.21	1788.95	2189.49	0	1080.05	0	0	0	0	0	0	0	415.26	0	0	0	8552.67	5264.14	0	0	0	0	0	0	0	0	0	0	0	3540.22	0	0	0	0	0	0	0	0	0	0	0	0	0	0	0	0	0	0
HMF000281	HMF000281A	2457.14	2146.32	1555.81	0	767.46	0	0	0	0	0	0	0	605.316	0	0	0	4206.96	3197.43	0	0	0	0	0	0	0	0	0	0	0	3282.57	0	0	0	0	0	0	0	0	0	0	0	0	0	0	0	0	0	0
HMF002818	HMF002818B	4055.82	2960.16	4483.15	0	2211.48	0	0	0	0	0	0	0	814.332	0	0	0	21850.3	10584.8	0	0	0	0	0	0	0	0	0	0	0	4712.04	0	0	0	0	0	0	0	0	0	0	0	0	0	0	0	0	0	0
HMF000568	HMF000568A	1577.54	1514.68	1722.42	0	849.646	0	0	0	0	0	0	0	488.589	0	0	0	7592.69	4598.11	0	0	0	0	0	0	0	0	0	0	0	1763.32	0	0	0	0	0	0	0	0	0	0	0	0	0	0	0	0	0	0
HMF002353	HMF002353A	452.157	440.043	1737.54	0	857.104	0	0	0	0	0	0	0	46.1751	0	0	0	510.306	1684.31	0	0	0	0	0	0	0	0	0	0	0	1375.05	0	0	0	0	0	0	0	0	0	0	0	0	0	0	0	0	0	0
HMF000451	HMF000451A	3449.82	3303.47	1664.96	0	821.3	0	0	0	0	0	0	0	1230.43	0	0	0	1501.66	1909.62	0	0	0	0	0	0	0	0	0	0	0	2360.74	0	0	0	0	0	0	0	0	0	0	0	0	0	0	0	0	0	0
HMF003663	HMF003663A	4573.98	1482.49	2058.66	0	1015.51	0	0	0	0	0	0	0	514.063	0	0	0	8416.07	2659.44	0	0	0	0	0	0	0	0	0	0	0	1402.79	0	0	0	0	0	0	0	0	0	0	0	0	0	0	0	0	0	0
HMF000146	HMF000146A	1763.08	809.133	2368.03	0	1168.12	0	0	0	0	0	0	0	285.361	0	0	0	1870.4	981.376	0	0	0	0	0	0	0	0	0	0	0	722.498	0	0	0	0	0	0	0	0	0	0	0	0	0	0	0	0	0	0
HMF001320	HMF001320A	1942.04	1533.6	4325.68	0	2133.8	0	0	0	0	0	0	0	248.276	0	0	0	12027.2	1450.16	0	0	0	0	0	0	0	0	0	0	0	4005.27	0	0	0	0	0	0	0	0	0	0	0	0	0	0	0	0	0	0
HMF002011	HMF002011B	1712.69	1755.89	3911.8	0	1929.64	0	0	0	0	0	0	0	529.714	0	0	0	36482.4	3669.33	0	0	0	0	0	0	0	0	0	0	0	2374.55	0	0	0	0	0	0	0	0	0	0	0	0	0	0	0	0	0	0
HMF000065	HMF000065A	3078.88	625.048	2533.03	0	1249.51	0	0	0	0	0	0	0	86.7491	0	0	0	0	994.43	0	0	0	0	0	0	0	0	0	0	0	1762.52	0	0	0	0	0	0	0	0	0	0	0	0	0	0	0	0	0	0
HMF002443	HMF002443A	0	3725.1	9577.6	0	4724.5	0	0	0	0	0	0	0	1486.07	0	0	0	12222.8	2709.08	0	0	0	0	0	0	0	0	0	0	0	1773.81	0	0	0	0	0	0	0	0	0	0	0	0	0	0	0	0	0	0
HMF002908	HMF002908A	1032.8	1689.98	3009.67	0	1484.63	0	0	0	0	0	0	0	561.092	0	0	0	47308.7	0	0	0	0	0	0	0	0	0	0	0	0	1823.61	0	0	0	0	0	0	0	0	0	0	0	0	0	0	0	0	0	0
HMF002634	HMF002634A	0	32003.5	1994.39	0	983.807	0	0	0	0	0	0	0	14458.9	0	0	0	0	0	0	0	0	0	0	0	0	0	0	0	0	0	0	0	0	0	0	0	0	0	0	0	0	0	0	0	0	0	0	0
HMF000811	HMF000811A	0	30043.7	2670.84	0	1317.49	0	0	0	0	0	0	0	13573.5	0	0	0	0	0	0	0	0	0	0	0	0	0	0	0	0	0	0	0	0	0	0	0	0	0	0	0	0	0	0	0	0	0	0	0
HMF001663	HMF001663A	2402.88	17483.7	1770.73	0	873.479	0	0	0	0	0	0	0	7796.25	0	0	0	8375.84	1828.76	0	0	0	0	0	0	0	0	0	0	0	925.366	0	0	0	0	0	0	0	0	0	0	0	0	0	0	0	0	0	0
HMF000500	HMF000500A	2573.18	1261.71	3043.14	0	1501.14	0	0	0	0	0	0	0	352.802	0	0	0	16976	2726.07	0	0	0	0	0	0	0	0	0	0	0	1956.96	0	0	0	0	0	0	0	0	0	0	0	0	0	0	0	0	0	0
HMF000726	HMF000726A	2178.86	1372.15	6245.98	0	3081.06	0	0	0	0	0	0	0	260.669	0	0	0	12782.6	4048.17	0	0	0	0	0	0	0	0	0	0	0	3236.49	0	0	0	0	0	0	0	0	0	0	0	0	0	0	0	0	0	0
HMF000726	HMF000726B	1602.95	1318.78	6351.46	0	3133.09	0	0	0	0	0	0	0	202.056	0	0	0	11721.3	4579.07	0	0	0	0	0	0	0	0	0	0	0	3547.33	0	0	0	0	0	0	0	0	0	0	0	0	0	0	0	0	0	0
HMF002818	HMF002818A	3640.04	2792.7	4271	0	2106.83	0	0	0	0	0	0	0	801.843	0	0	0	21102.6	10167	0	0	0	0	0	0	0	0	0	0	0	4142.93	0	0	0	0	0	0	0	0	0	0	0	0	0	0	0	0	0	0
HMF002011	HMF002011A	1693.03	1797.23	4140.27	0	2042.34	0	0	0	0	0	0	0	537.289	0	0	0	36809.7	3710.57	0	0	0	0	0	0	0	0	0	0	0	2474.57	0	0	0	0	0	0	0	0	0	0	0	0	0	0	0	0	0	0
HMF000290	HMF000290A	0	2830.63	1280.28	8439.99	13111.2	0	0	4406.67	1344.27	0	0	0	3573.31	0	0	0	0	1400.2	0	0	0	0	0	0	0	0	0	0	0	0	0	0	0	0	0	0	0	0	0	0	0	0	0	0	0	0	0	0
HMF002046	HMF002046A	1177.35	643.182	1364.23	0	0	0	206.088	364.937	209.722	0	0	504.579	547.665	0	0	0	0	0	0	0	0	0	0	0	0	0	0	0	263.191	0	0	0	0	0	0	0	0	0	0	0	0	0	0	0	0	0	0	0
HMF002061	HMF002061A	587.728	0	459.938	0	0	0	0	0	0	0	0	0	49.1094	0	0	253.996	0	0	0	0	0	0	0	0	0	0	0	0	0	226.009	0	0	0	0	0	0	0	0	0	0	0	0	0	0	0	0	0	0
HMF003022	HMF003022A	1008.16	855.115	626.057	293.256	0	0	258.846	1494.01	0	0	0	0	671.252	0	0	0	0	0	0	0	0	0	398.54	0	0	0	0	0	0	0	0	0	0	0	0	0	0	0	0	0	0	0	0	0	0	0	0	0
HMF000316	HMF000316B	428.612	1811.04	3795.63	1001.6	0	600.661	0	2351.83	1050.9	0	393.901	0	1095.68	0	0	2756.3	603.679	0	0	0	0	0	0	0	0	0	0	0	811.948	0	0	0	0	0	0	0	0	0	0	0	0	0	0	0	0	0	0	0
HMF001141	HMF001141A	1350.68	2287.18	740.058	389.317	0	0	433.477	772.544	0	0	0	0	1353.22	0	0	0	0	0	0	0	0	0	154.306	0	0	0	0	0	0	0	0	0	0	0	0	0	0	0	0	0	0	0	0	0	0	0	0	0
HMF003381	HMF003381A	1606.64	3662.7	1086.85	0	1738.35	0	0	1562.91	984.798	0	0	0	2738.23	0	309.666	0	0	922.463	0	0	0	0	0	0	0	0	0	0	0	644.97	0	0	0	0	0	0	0	0	0	0	0	0	0	0	0	0	0	0
HMF000557	HMF000557A	592.593	2166.17	1238.74	2859.36	3264.77	0	519.019	2445.45	453.454	0	0	0	2214.22	0	0	1939.94	0	878.879	1289.79	0	0	0	659.66	0	0	0	0	0	724.225	0	0	0	0	0	0	0	0	0	0	0	0	0	0	0	0	0	0	0
HMF000633	HMF000633A	1939.94	527.953	2241.48	0	990.554	0	475.981	0	551.623	0	0	456.941	983.865	0	0	0	0	906.679	0	0	0	0	0	0	0	0	0	0	0	0	0	0	0	0	0	0	0	0	0	0	0	0	0	0	0	0	0	0
HMF004331	HMF004331A	910.663	15421.6	1439.42	0	0	0	2468.86	2622.23	0	0	0	0	17341.7	0	0	0	0	0	0	0	0	0	0	0	0	0	0	0	0	0	0	0	0	0	0	0	0	0	0	0	0	0	0	0	0	0	0	0
HMF003520	HMF003520A	1216.93	78.4297	0	0	744.323	0	0	959.879	0	0	0	0	0	0	0	0	0	0	0	0	0	0	0	0	0	0	0	0	0	0	0	0	0	0	0	0	0	0	0	0	0	0	0	0	0	0	0	0
HMF000138	HMF000138A	1149.41	472.089	193.222	0	656.956	0	0	237.611	0	0	0	0	87.7333	0	0	0	0	99.2222	0	0	0	0	0	0	0	0	0	0	0	0	0	0	0	0	0	0	0	0	0	0	0	0	0	0	0	0	0	0
HMF001268	HMF001268B	0	7351.12	1657.58	697.662	0	717.293	783.737	2381.92	0	0	0	0	9245.28	0	0	0	402.187	0	0	0	0	0	0	0	0	0	0	0	735.414	0	0	0	0	0	0	0	0	0	0	0	0	0	0	0	0	0	0	0
HMF002066	HMF002066B	371.425	770.101	3528.03	3125.32	0	0	798.866	4935	1514.97	0	0	0	539.474	971.457	0	1072.39	0	0	0	0	0	370.415	2637.32	0	0	0	364.864	0	0	0	0	0	0	0	0	0	0	0	0	0	0	0	0	0	0	0	0	0
HMF002076	HMF002076A	464.494	129.139	0	0	1366.94	0	0	382.825	339.948	119.952	0	0	0	0	0	1135.2	0	0	0	0	190.391	0	0	0	0	0	0	0	0	0	0	0	0	0	0	0	0	0	0	0	0	0	0	0	0	0	0	0
HMF003259	HMF003259A	851.473	1363.17	3342.69	844.394	0	0	0	1611.43	976.868	0	397.421	0	4881.81	0	0	3845.28	0	0	0	0	0	0	0	0	0	0	0	0	905.069	0	0	0	0	0	0	0	0	0	0	0	0	0	0	0	0	0	0	0
HMF001683	HMF001683A	891.538	671.608	283.648	0	0	0	0	208.111	136.171	84.2722	0	0	416.736	0	0	304.716	0	0	0	0	0	0	0	0	0	0	0	0	0	0	0	0	0	0	0	0	0	0	0	0	0	0	0	0	0	0	0	0
HMF004191	HMF004191A	710.892	0	3581.78	0	2407.42	0	0	1359.04	1409.13	0	0	0	824.736	0	544.427	2147.86	0	0	0	0	0	0	0	0	0	0	0	0	0	0	0	0	0	0	0	0	0	0	0	0	0	0	0	0	0	0	0	0
HMF003210	HMF003210A	481.43	101.779	301.029	0	0	0	0	0	88.3161	0	0	0	0	0	0	190.634	0	0	0	0	0	0	0	0	0	0	0	0	0	150.784	0	0	0	0	0	0	0	0	0	0	0	0	0	0	0	0	0	0
HMF000981	HMF000981A	846.279	222.41	224.96	0	912.084	0	0	707.018	0	0	0	0	0	0	0	287.704	0	0	0	0	0	0	0	0	0	0	0	0	0	232.102	0	0	0	0	0	0	0	0	0	0	0	0	0	0	0	0	0	0
HMF003089	HMF003089A	452.977	0	0	0	419.228	0	0	0	115.486	0	0	0	0	0	0	222.006	0	0	0	0	0	0	0	0	0	0	0	0	0	132.887	0	0	0	0	0	0	0	0	0	0	0	0	0	0	0	0	0	0
HMF003009	HMF003009A	335.25	0	169.29	0	0	0	0	0	0	0	0	0	0	0	0	140.427	0	0	0	0	0	0	0	0	0	0	0	0	0	78.8169	0	0	0	0	0	0	0	0	0	0	0	0	0	0	0	0	0	0
HMF003540	HMF003540A	576.526	108.066	186.143	0	553.258	0	0	803.517	243.02	0	0	0	64.6329	0	0	0	0	203.206	0	0	0	0	0	0	0	0	0	0	0	0	0	0	0	0	0	0	0	0	0	0	0	0	0	0	0	0	0	0
HMF001158	HMF001158A	0	0	0	3404.06	0	0	0	2159.09	408.789	0	0	0	0	2420.05	0	0	0	0	0	1424.48	0	533.99	2158.08	0	0	0	0	0	0	0	0	0	0	0	0	0	0	0	0	0	0	0	0	0	0	0	0	0
HMF000748	HMF000748A	2270.25	1903.45	1225.19	0	0	0	0	470.453	0	0	0	693.353	2067.48	0	0	0	0	204.282	0	0	0	0	0	0	0	0	0	0	0	0	0	0	0	0	0	0	0	0	0	0	0	0	0	0	0	0	0	0
HMF003631	HMF003631A	290.43	0	0	0	0	0	0	0	1785.14	0	0	0	0	0	0	2441.61	0	0	0	0	0	0	0	0	0	1058.07	0	507.751	0	0	0	0	0	0	0	0	0	0	0	0	0	0	0	0	0	0	0	0
HMF003716	HMF003716A	756.198	0	261.741	0	0	0	0	0	0	0	0	0	0	0	0	0	0	0	0	0	0	0	0	0	0	0	0	0	0	104.178	0	0	0	0	0	0	0	0	0	0	0	0	0	0	0	0	0	0
HMF002410	HMF002410A	622.984	0	167.002	0	0	0	0	0	0	0	0	0	0	0	0	289.504	0	0	0	0	0	0	0	0	0	0	0	0	0	97.374	0	0	0	0	0	0	0	0	0	0	0	0	0	0	0	0	0	0
HMF000472	HMF000472B	268.883	0	554.109	103.862	439.175	0	0	285.754	134.441	0	0	0	0	0	0	0	0	0	0	0	0	0	0	0	0	0	0	0	0	0	0	0	0	0	0	0	0	0	0	0	0	0	0	0	0	0	0	0
HMF002605	HMF002605A	1850.94	0	283.271	0	443.757	0	0	176.789	212.453	0	0	0	0	0	0	0	0	255.759	0	0	0	0	0	0	0	0	0	0	0	0	0	0	0	0	0	0	0	0	0	0	0	0	0	0	0	0	0	0
HMF000825	HMF000825A	376.76	0	544.837	0	1290.65	0	0	713.427	355.172	0	0	0	0	186.067	0	0	0	1594.42	0	0	0	0	0	0	0	0	0	0	0	0	0	0	0	0	0	0	0	0	0	0	0	0	0	0	0	0	0	0
HMF000490	HMF000490A	733.843	213.249	2505.81	392.235	2273.64	0	0	800.835	457.182	0	0	0	164.667	0	0	0	0	349.79	0	0	0	0	0	0	0	0	0	0	0	0	0	0	0	0	0	0	0	0	0	0	0	0	0	0	0	0	0	0
HMF003694	HMF003694A	412.253	166.039	0	0	1320.56	0	0	0	0	0	0	0	154.142	0	136.556	387.425	0	0	0	0	0	0	0	0	0	0	0	0	311.388	0	0	0	0	0	0	0	0	0	0	0	0	0	0	0	0	0	0	0
HMF003711	HMF003711A	1096.81	380.308	5844.58	0	1031.4	0	0	2043.52	529.896	0	368.139	0	585.675	0	0	0	0	0	0	0	0	0	0	0	0	0	0	0	0	0	0	0	0	0	0	0	0	0	0	0	0	0	0	0	0	0	0	0
HMF000039	HMF000039A	954.463	169.98	446.584	0	557.328	0	0	312.145	244.668	0	0	0	123.107	0	0	451.22	0	611.928	0	0	0	0	0	0	0	0	0	0	0	0	0	0	0	0	0	0	0	0	0	0	0	0	0	0	0	0	0	0
HMF000823	HMF000823A	1247.38	1023.22	13534	0	0	0	869.112	0	3225.77	0	0	0	6452.54	0	0	0	1750.23	0	0	0	0	0	0	0	0	0	0	0	0	0	0	0	0	0	0	0	0	0	0	0	0	0	0	0	0	0	0	0
HMF002031	HMF002031A	739.001	16582.1	3503.6	0	0	0	0	0	1127.34	0	0	0	26867.3	0	0	0	0	0	0	0	0	0	0	0	0	0	0	0	0	0	0	0	0	0	0	0	0	0	0	0	0	0	0	0	0	0	0	0
HMF000040	HMF000040A	2038.97	2662.12	1624.56	0	864.971	0	0	0	616.018	0	0	0	5623.58	0	0	0	0	465.832	0	0	0	0	0	0	0	0	0	0	0	0	0	0	0	0	0	0	0	0	0	0	0	0	0	0	0	0	0	0
HMF002030	HMF002030A	753.861	740.554	436.042	0	0	0	0	678.628	247.704	0	0	0	723.665	0	0	1704.76	0	870.548	0	0	0	0	0	0	0	0	0	0	0	0	0	0	0	0	0	0	0	0	0	0	0	0	0	0	0	0	0	0
HMF001950	HMF001950A	3055.79	249.358	1402.96	0	0	0	0	0	438.809	0	0	0	394.263	0	0	0	0	561.184	0	0	0	0	0	0	0	0	0	0	0	0	0	0	0	0	0	0	0	0	0	0	0	0	0	0	0	0	0	0
HMF001643	HMF001643A	1827.43	508.207	1344.96	2342.19	2524.89	0	0	2019.71	1417.13	0	0	0	928.601	0	0	1536.23	2089.86	740.862	0	0	0	0	0	0	0	0	270.001	0	0	0	0	0	0	0	0	0	0	0	0	0	0	0	0	0	0	0	0	0
HMF000434	HMF000434A	0	0	0	0	4803.03	9513.02	0	5863.22	2963.29	0	0	16310.7	856.499	1767.82	3367.15	0	0	0	0	0	0	0	0	0	0	4547.54	0	1030.01	0	0	0	0	0	0	0	0	0	0	0	0	0	0	0	0	0	0	0	0
HMF001119	HMF001119A	514.186	5103.86	4880.46	0	0	0	0	0	2485.82	0	0	478.218	5305.99	0	0	0	965.555	0	0	0	0	0	0	0	0	0	0	0	0	0	0	0	0	0	0	0	0	0	0	0	0	0	0	0	0	0	0	0
HMF003410	HMF003410A	555.848	2116.63	1224.97	0	1506.15	0	0	844.548	773.376	0	0	0	2073.53	0	0	3197.76	1326.22	397.965	0	0	0	0	0	0	0	0	0	0	0	0	0	0	0	0	0	0	0	0	0	0	0	0	0	0	0	0	0	0
HMF001582	HMF001582A	1025.81	4470.54	1893	0	3499.77	0	0	6473.62	792.127	0	0	0	5699.51	0	0	5204.62	0	0	0	0	0	551.937	0	0	0	0	437.846	0	0	0	0	0	0	0	0	0	0	0	0	0	0	0	0	0	0	0	0	0
HMF001606	HMF001606A	755.037	184.803	0	0	1183.35	0	0	356.843	120.479	178.166	0	0	0	177.145	0	0	0	434.44	0	0	0	0	0	0	0	0	0	0	0	0	0	0	0	0	0	0	0	0	0	0	0	0	0	0	0	0	0	0
HMF003035	HMF003035A	349.385	0	106.955	0	0	0	0	0	58.6879	0	0	0	0	0	0	0	0	0	0	0	0	0	0	0	0	0	0	0	0	0	0	0	0	0	0	0	0	0	0	0	0	0	0	0	0	0	0	0
HMF002843	HMF002843A	500.956	344.091	4007.65	1256.94	5384.52	0	0	3008.27	647.701	0	0	1228.61	893.119	0	0	1830.77	0	1045.94	0	0	0	0	0	0	0	0	299.562	0	0	0	0	0	0	0	0	0	0	0	0	0	0	0	0	0	0	0	0	0
HMF003393	HMF003393A	1256.44	283.114	4182.96	0	0	0	0	0	268.055	0	0	0	586.307	0	207.316	0	0	0	0	0	257.513	329.296	529.082	634.496	0	0	0	0	0	345.861	0	0	0	0	0	0	0	0	0	0	0	0	0	0	0	0	0	0
HMF004069	HMF004069A	0	951.377	4295	3149.83	0	0	451.841	6010.49	1068.35	0	0	0	1165.75	0	0	2751.71	0	0	0	0	0	0	1753.14	0	0	0	0	0	1584.46	0	0	0	0	0	0	0	0	0	0	0	0	0	0	0	0	0	0	0
HMF000316	HMF000316A	478.135	1933.79	4125.62	956.27	0	623.852	0	2318.83	1151.57	0	413.878	0	1124.76	0	0	2874.88	594	0	0	0	0	0	0	0	0	0	0	0	820.166	0	0	0	0	0	0	0	0	0	0	0	0	0	0	0	0	0	0	0
HMF004354	HMF004354A	942.047	979.729	2192.58	0	1582.64	0	251.213	816.944	2564.88	0	0	0	973.7	0	361.746	0	0	0	0	0	0	0	0	0	0	0	233.628	0	0	0	0	0	0	0	0	0	0	0	0	0	0	0	0	0	0	0	0	0
HMF001268	HMF001268A	0	7348.28	2025	913.708	0	704.588	897.66	2960.27	0	0	0	0	9144.6	0	0	0	392.162	0	0	0	0	0	0	0	0	0	0	0	1063.15	0	0	0	0	0	0	0	0	0	0	0	0	0	0	0	0	0	0	0
HMF002513	HMF002513A	785.118	96.9605	245.808	0	628.933	0	0	313.418	0	0	0	0	87.5265	0	0	536.166	0	0	0	0	112.16	0	0	0	0	0	0	0	0	246.332	0	0	0	0	0	0	0	0	0	0	0	0	0	0	0	0	0	0
HMF000472	HMF000472A	313.279	0	574.169	130.18	0	0	0	289.995	133.355	0	0	0	0	0	0	227.022	0	0	0	0	0	0	0	0	0	0	0	0	0	0	0	0	0	0	0	0	0	0	0	0	0	0	0	0	0	0	0	0
HMF001685	HMF001685A	1093.1	129.733	930.936	0	1751.4	0	0	705.423	315.211	0	0	0	156.085	0	0	0	0	0	0	0	0	0	0	0	0	0	0	0	0	294.94	0	0	0	0	0	0	0	0	0	0	0	0	0	0	0	0	0	0
HMF000949	HMF000949A	502.609	264.258	493.801	0	967.393	0	0	217.106	281.358	114.512	0	0	255.968	0	0	0	0	185.499	0	0	0	0	0	0	0	0	0	0	0	0	0	0	0	0	0	0	0	0	0	0	0	0	0	0	0	0	0	0
HMF002394	HMF002394A	0	2815.42	1580.9	0	0	0	0	0	0	0	0	0	378.207	0	0	727.726	176.911	2332.59	0	0	0	207.066	0	0	0	0	0	0	0	0	0	0	0	0	0	0	0	0	0	0	0	0	0	0	0	0	0	0
HMF003724	HMF003724A	501.241	383.94	488.707	1155.45	240.565	0	0	0	0	0	0	0	116.916	0	0	224.963	337.814	318.096	0	0	0	137.019	0	0	0	0	0	0	0	289.076	0	0	0	0	0	276.031	0	0	0	0	0	0	0	0	0	0	0	0
HMF000425	HMF000425A	625.767	212.39	395.838	420.344	190.922	0	0	0	0	0	0	0	94.6983	0	0	182.213	244.909	175.966	0	0	0	0	0	0	0	0	0	0	0	229.422	0	0	0	0	0	517.807	0	0	0	0	0	0	0	0	0	0	0	0
HMF002471	HMF002471A	744.574	627.307	998.854	1750.47	221.533	0	0	0	0	0	0	0	238.961	0	0	459.795	301.221	519.727	0	0	0	182.029	0	0	0	0	0	0	0	266.205	0	0	0	0	0	810.903	0	0	0	0	0	0	0	0	0	0	0	0
HMF001936	HMF001936A	588.511	376.132	534.962	1337.62	125.497	0	0	0	0	0	0	0	127.982	0	0	246.255	242.387	311.627	0	0	0	157.102	0	0	0	0	0	0	0	150.804	0	0	0	0	0	547.614	0	0	0	0	0	0	0	0	0	0	0	0
HMF002469	HMF002469A	246.108	196.822	805.73	562.39	245.195	0	0	0	0	0	0	0	192.759	0	0	370.896	393.974	163.068	0	0	0	168.416	0	0	0	0	0	0	0	294.639	0	0	0	0	0	661.134	0	0	0	0	0	0	0	0	0	0	0	0
HMF001576	HMF001576A	228.984	38.5111	0	0	255.412	0	0	0	0	0	0	0	0	0	0	0	51.1668	31.9066	0	0	0	0	0	0	0	0	0	0	0	306.916	0	0	0	0	0	194.535	0	0	0	0	0	0	0	0	0	0	0	0
HMF000611	HMF000611A	516.63	298.985	814.345	1273.79	265.837	0	0	0	0	0	0	0	194.82	0	0	374.861	295.646	247.71	0	0	0	208.957	0	0	0	0	0	0	0	319.443	0	0	0	0	0	1067.33	0	0	0	0	0	0	0	0	0	0	0	0
HMF001554	HMF001554A	416.067	121.43	319.546	416.567	312.543	0	0	0	0	0	0	0	76.4467	0	0	147.094	107.017	100.606	0	0	0	72.0116	0	0	0	0	0	0	0	375.568	0	0	0	0	0	321.552	0	0	0	0	0	0	0	0	0	0	0	0
HMF002531	HMF002531A	348.65	542.837	816.458	1363.18	267.556	0	0	0	0	0	0	0	195.325	0	0	375.834	376.083	449.743	0	0	0	252.884	0	0	0	0	0	0	0	321.509	0	0	0	0	0	1030.99	0	0	0	0	0	0	0	0	0	0	0	0
HMF000047	HMF000047A	363.037	461.722	705.372	1995.71	110.759	0	0	0	0	0	0	0	168.75	0	0	324.698	320.151	382.539	0	0	0	157.083	0	0	0	0	0	0	0	133.094	0	0	0	0	0	578.964	0	0	0	0	0	0	0	0	0	0	0	0
HMF002486	HMF002486A	920.827	459.579	561.806	2656	0	0	0	0	0	0	0	0	134.404	0	0	258.612	502.406	380.763	0	0	0	235.956	0	0	0	0	0	0	0	0	0	0	0	0	0	769.856	0	0	0	0	0	0	0	0	0	0	0	0
HMF003715	HMF003715A	257.35	226.616	732.314	0	489.887	0	0	0	0	0	0	0	175.195	0	0	337.101	756.999	187.752	0	0	0	245.812	0	0	0	0	0	0	0	588.674	0	0	0	0	0	558.845	0	0	0	0	0	0	0	0	0	0	0	0
HMF003525	HMF003525A	533.067	265.752	513.407	1026.52	241.894	0	0	0	0	0	0	0	122.825	0	0	236.333	179.528	220.177	0	0	0	142.92	0	0	0	0	0	0	0	290.672	0	0	0	0	0	495.456	0	0	0	0	0	0	0	0	0	0	0	0
HMF003976	HMF003976A	170.926	334.554	495.208	1130.51	328.928	0	0	0	0	0	0	0	118.471	0	0	227.955	333.855	277.18	0	0	0	119.948	0	0	0	0	0	0	0	395.257	0	0	0	0	0	773.664	0	0	0	0	0	0	0	0	0	0	0	0
HMF001722	HMF001722A	482.017	759.905	1851.29	1199.29	0	0	0	0	0	0	0	0	442.893	0	0	852.19	448.981	629.585	0	0	0	343.368	0	0	0	0	0	0	0	0	0	0	0	0	0	1331.43	0	0	0	0	0	0	0	0	0	0	0	0
HMF001181	HMF001181A	685.417	215.02	616.695	1336.86	395.956	0	0	0	0	0	0	0	147.535	0	0	283.878	293.75	178.145	0	0	0	192.836	0	0	0	0	0	0	0	475.801	0	0	0	0	0	713.892	0	0	0	0	0	0	0	0	0	0	0	0
HMF000190	HMF000190A	232.279	351.592	542.566	653.378	191.946	0	0	0	0	0	0	0	129.801	0	0	249.756	425.595	291.296	0	0	0	222.788	0	0	0	0	0	0	0	230.652	0	0	0	0	0	820.719	0	0	0	0	0	0	0	0	0	0	0	0
HMF001853	HMF001853A	467.248	614.268	2472.25	1719.23	261.202	0	0	0	0	0	0	0	591.45	0	0	1138.03	775.752	508.924	0	0	0	331.467	0	0	0	0	0	0	0	313.873	0	0	0	0	0	1231.52	0	0	0	0	0	0	0	0	0	0	0	0
HMF003060	HMF003060A	262.42	302.614	681.44	618.811	360.528	0	0	0	0	0	0	0	163.024	0	0	313.682	728.778	250.717	0	0	0	463.359	0	0	0	0	0	0	0	433.229	0	0	0	0	0	1236.62	0	0	0	0	0	0	0	0	0	0	0	0
HMF003166	HMF003166A	610.718	352.112	1101.05	1409.12	0	0	0	0	0	0	0	0	263.41	0	0	506.838	595.664	291.727	0	0	0	269.981	0	0	0	0	0	0	0	0	0	0	0	0	0	544.478	0	0	0	0	0	0	0	0	0	0	0	0
HMF002860	HMF002860A	461.054	305.692	667.763	546.971	352.349	0	0	0	0	0	0	0	159.752	0	0	307.387	271.737	253.267	0	0	0	134.87	0	0	0	0	0	0	0	423.401	0	0	0	0	0	477.538	0	0	0	0	0	0	0	0	0	0	0	0
HMF002903	HMF002903A	398.81	452.95	643.457	2245.38	0	0	0	0	0	0	0	0	153.937	0	0	296.198	301.49	375.271	0	0	0	242.798	0	0	0	0	0	0	0	0	0	0	0	0	0	769.026	0	0	0	0	0	0	0	0	0	0	0	0
HMF002487	HMF002487A	446.005	366.968	1067.9	1378.43	147.061	0	0	0	0	0	0	0	255.478	0	0	491.577	426.549	304.035	0	0	0	273.889	0	0	0	0	0	0	0	176.716	0	0	0	0	0	544.286	0	0	0	0	0	0	0	0	0	0	0	0
HMF002352	HMF002352A	506.185	386.198	411.978	879.215	201.824	0	0	0	0	0	0	0	98.5595	0	0	189.643	205.466	319.967	0	0	0	175.544	0	0	0	0	0	0	0	242.522	0	0	0	0	0	618.892	0	0	0	0	0	0	0	0	0	0	0	0
HMF003170	HMF003170A	215.011	530.246	1015.33	0	124.127	0	0	0	0	0	0	0	242.902	0	0	467.379	94.9463	439.311	0	0	0	0	0	0	0	0	0	0	0	149.157	0	0	0	0	0	271.275	0	0	0	0	0	0	0	0	0	0	0	0
HMF003395	HMF003395A	638.618	419.927	740.942	1223.85	158.628	0	0	0	0	0	0	0	177.259	0	0	341.073	243.473	347.911	0	0	0	176.618	0	0	0	0	0	0	0	190.616	0	0	0	0	0	578.747	0	0	0	0	0	0	0	0	0	0	0	0
HMF000673	HMF000673A	518.593	404.695	736.103	0	297.341	0	0	0	0	0	0	0	176.101	0	0	338.845	285.653	335.292	0	0	0	239.968	0	0	0	0	0	0	0	357.301	0	0	0	0	0	1065.8	0	0	0	0	0	0	0	0	0	0	0	0
HMF001771	HMF001771A	317.233	315.193	415.48	970.743	271.788	0	0	0	0	0	0	0	99.3972	0	0	191.255	206.477	261.139	0	0	0	135.814	0	0	0	0	0	0	0	326.595	0	0	0	0	0	397.919	0	0	0	0	0	0	0	0	0	0	0	0
HMF002139	HMF002139A	419.561	233.826	552.801	532.942	470.744	0	0	0	0	0	0	0	132.249	0	0	254.467	580.892	193.726	0	0	0	301.684	0	0	0	0	0	0	0	565.671	0	0	0	0	0	1007.45	0	0	0	0	0	0	0	0	0	0	0	0
HMF001356	HMF001356A	292.978	288.685	974.786	1181.43	271.376	0	0	0	0	0	0	0	233.203	0	0	448.716	354.579	239.177	0	0	0	277.453	0	0	0	0	0	0	0	326.099	0	0	0	0	0	397.149	0	0	0	0	0	0	0	0	0	0	0	0
HMF002892	HMF002892A	595.045	393.909	569.973	1179.07	388.573	0	0	0	0	0	0	0	136.357	0	0	262.371	531.934	326.356	0	0	0	198.348	0	0	0	0	0	0	0	466.929	0	0	0	0	0	383.674	0	0	0	0	0	0	0	0	0	0	0	0
HMF001709	HMF001709A	200.618	469.864	1207.56	1033.18	0	0	0	0	0	0	0	0	288.892	0	0	555.869	369.639	389.284	0	0	0	292.903	0	0	0	0	0	0	0	0	0	0	0	0	0	847.612	0	0	0	0	0	0	0	0	0	0	0	0
HMF000204	HMF000204A	565.895	197.17	620.139	2146.59	357.61	0	0	0	0	0	0	0	148.359	0	0	285.464	219.931	163.356	0	0	0	345.964	0	0	0	0	0	0	0	429.723	0	0	0	0	0	583.972	0	0	0	0	0	0	0	0	0	0	0	0
HMF000895	HMF000895A	568.754	221.081	483.381	778.401	461.077	0	0	0	0	0	0	0	115.642	0	0	222.511	231.715	183.166	0	0	0	197.609	0	0	0	0	0	0	0	554.054	0	0	0	0	0	829.558	0	0	0	0	0	0	0	0	0	0	0	0
HMF004269	HMF004269A	250.339	160.049	333.122	537.449	0	0	0	0	0	0	0	0	79.6944	0	0	153.344	129.451	132.601	0	0	0	78.5773	0	0	0	0	0	0	0	0	0	0	0	0	0	176.799	0	0	0	0	0	0	0	0	0	0	0	0
HMF001431	HMF001431A	330.695	1277.46	3074.44	2055.11	0	0	0	0	0	0	0	0	735.513	0	0	1415.23	756.802	1058.38	0	0	0	892.177	0	0	0	0	0	0	0	0	0	0	0	0	0	0	0	0	0	0	0	0	0	0	0	0	0	0
HMF002563	HMF002563A	372.427	353.901	573.34	1414.52	310.085	0	0	0	0	0	0	0	137.163	0	0	263.921	507.763	293.209	0	0	0	204.509	0	0	0	0	0	0	0	372.614	0	0	0	0	0	897.233	0	0	0	0	0	0	0	0	0	0	0	0
HMF003947	HMF003947A	785.126	502.13	869.484	2259.86	596.921	0	0	0	0	0	0	0	208.011	0	0	400.243	367.559	416.017	0	0	0	430.069	0	0	0	0	0	0	0	717.291	0	0	0	0	0	810.63	0	0	0	0	0	0	0	0	0	0	0	0
HMF000843	HMF000843A	480.717	399.83	616.963	1916.86	283.847	0	0	0	0	0	0	0	147.599	0	0	284.002	356.532	331.261	0	0	0	387.077	0	0	0	0	0	0	0	341.085	0	0	0	0	0	899.842	0	0	0	0	0	0	0	0	0	0	0	0
HMF002113	HMF002113A	424.752	504.263	881.929	3095.84	231.782	0	0	0	0	0	0	0	210.988	0	0	405.972	356.712	417.784	0	0	0	293.674	0	0	0	0	0	0	0	278.521	0	0	0	0	0	926.55	0	0	0	0	0	0	0	0	0	0	0	0
HMF003621	HMF003621A	388.065	299.089	710.858	2141.6	117.28	0	0	0	0	0	0	0	170.062	0	0	327.224	406.544	247.797	0	0	0	296.667	0	0	0	0	0	0	0	140.93	0	0	0	0	0	909.979	0	0	0	0	0	0	0	0	0	0	0	0
HMF003229	HMF003229A	638.648	411.634	1561.65	1022.74	339.824	0	0	0	0	0	0	0	373.601	0	0	718.863	454.605	341.04	0	0	0	348.081	0	0	0	0	0	0	0	408.349	0	0	0	0	0	857.698	0	0	0	0	0	0	0	0	0	0	0	0
HMF001464	HMF001464A	312.602	391.237	476.925	843.124	141.985	0	0	0	0	0	0	0	114.097	0	0	219.539	463.393	324.141	0	0	0	215.415	0	0	0	0	0	0	0	170.617	0	0	0	0	0	954.338	0	0	0	0	0	0	0	0	0	0	0	0
HMF002068	HMF002068A	439.873	438.612	697.063	1805.13	589.125	0	0	0	0	0	0	0	166.762	0	0	320.874	450.406	363.392	0	0	0	400.249	0	0	0	0	0	0	0	707.923	0	0	0	0	0	1293.54	0	0	0	0	0	0	0	0	0	0	0	0
HMF003272	HMF003272A	522.413	613.047	1102.8	1320.81	153.335	0	0	0	0	0	0	0	263.829	0	0	507.644	398.196	507.912	0	0	0	260.455	0	0	0	0	0	0	0	184.255	0	0	0	0	0	843.974	0	0	0	0	0	0	0	0	0	0	0	0
HMF001484	HMF001484A	284.071	477.286	1570.8	1746.94	0	0	0	0	0	0	0	0	375.791	0	0	723.076	693.174	395.433	0	0	0	656.165	0	0	0	0	0	0	0	0	0	0	0	0	0	1383.35	0	0	0	0	0	0	0	0	0	0	0	0
HMF002565	HMF002565A	908.557	324.318	709.93	1604.75	294.375	0	0	0	0	0	0	0	169.84	0	0	326.797	403.191	268.699	0	0	0	236.906	0	0	0	0	0	0	0	353.736	0	0	0	0	0	916.07	0	0	0	0	0	0	0	0	0	0	0	0
HMF003741	HMF003741A	268.054	495.209	782.725	868.055	489.499	0	0	0	0	0	0	0	187.255	0	0	360.306	343.428	410.283	0	0	0	268.553	0	0	0	0	0	0	0	588.207	0	0	0	0	0	1291.35	0	0	0	0	0	0	0	0	0	0	0	0
HMF001660	HMF001660A	551.446	268.832	824.522	5838.34	0	0	0	0	0	0	0	0	197.254	0	0	379.546	383.268	222.729	0	0	0	245.531	0	0	0	0	0	0	0	0	0	0	0	0	0	592.368	0	0	0	0	0	0	0	0	0	0	0	0
HMF003119	HMF003119A	218.34	122.68	262.51	321.528	175.474	0	0	0	0	0	0	0	62.8015	0	0	120.839	134.593	101.641	0	0	0	76.2693	0	0	0	0	0	0	0	210.858	0	0	0	0	0	129.11	0	0	0	0	0	0	0	0	0	0	0	0
HMF004389	HMF004389A	412.95	264.211	480.642	673.048	378.997	0	0	0	0	0	0	0	114.986	0	0	221.25	627.945	218.9	0	0	0	253.583	0	0	0	0	0	0	0	455.422	0	0	0	0	0	1547.56	0	0	0	0	0	0	0	0	0	0	0	0
HMF000131	HMF000131A	259.78	264.435	285.087	1168.76	537.449	0	0	0	0	0	0	0	68.2029	0	0	131.232	245.264	219.086	0	0	0	247.767	0	0	0	0	0	0	0	645.827	0	0	0	0	0	732.29	0	0	0	0	0	0	0	0	0	0	0	0
HMF003898	HMF003898A	717.301	807.749	1252.37	1685.83	135.619	0	0	0	0	0	0	0	299.611	0	0	576.494	448.126	669.223	0	0	0	206.866	0	0	0	0	0	0	0	162.966	0	0	0	0	0	274.658	0	0	0	0	0	0	0	0	0	0	0	0
HMF002508	HMF002508A	232.411	245.443	332.439	1089.93	196.564	0	0	0	0	0	0	0	79.5309	0	0	153.029	152.77	203.35	0	0	0	154.774	0	0	0	0	0	0	0	236.201	0	0	0	0	0	515.411	0	0	0	0	0	0	0	0	0	0	0	0
HMF002108	HMF002108A	322.311	411.388	829.216	2364.28	136.439	0	0	0	0	0	0	0	198.377	0	0	381.707	355.688	340.837	0	0	0	279.967	0	0	0	0	0	0	0	163.952	0	0	0	0	0	1033.19	0	0	0	0	0	0	0	0	0	0	0	0
HMF002362	HMF002362A	682.428	229.355	1159.79	1309.24	326.575	0	0	0	0	0	0	0	277.461	0	0	533.876	426.392	190.022	0	0	0	185.889	0	0	0	0	0	0	0	392.429	0	0	0	0	0	932.952	0	0	0	0	0	0	0	0	0	0	0	0
HMF000213	HMF000213B	650.824	397.855	691.586	609.239	710.231	0	0	0	0	0	0	0	165.452	0	0	318.353	735.997	329.625	0	0	0	406.827	0	0	0	0	0	0	0	853.45	0	0	0	0	0	1558.67	0	0	0	0	0	0	0	0	0	0	0	0
HMF002388	HMF002388A	355.499	663.815	1000.91	0	427.032	0	0	0	0	0	0	0	239.452	0	0	460.741	886.75	549.974	0	0	0	146.793	0	0	0	0	0	0	0	513.143	0	0	0	0	0	1085.97	0	0	0	0	0	0	0	0	0	0	0	0
HMF001943	HMF001943A	520.117	708.801	1297.32	2568.61	0	0	0	0	0	0	0	0	310.365	0	0	597.188	337.252	587.245	0	0	0	279.794	0	0	0	0	0	0	0	0	0	0	0	0	0	503.629	0	0	0	0	0	0	0	0	0	0	0	0
HMF001616	HMF001616A	160.258	248.736	653.009	790.808	347.17	0	0	0	0	0	0	0	156.223	0	0	300.595	648.023	206.079	0	0	0	276.084	0	0	0	0	0	0	0	417.177	0	0	0	0	0	1038.43	0	0	0	0	0	0	0	0	0	0	0	0
HMF002837	HMF002837A	444.135	262.021	1283.99	271.777	309.967	0	0	0	0	0	0	0	307.174	0	0	591.047	543.553	217.085	0	0	0	137.887	0	0	0	0	0	0	0	372.472	0	0	0	0	0	1093.6	0	0	0	0	0	0	0	0	0	0	0	0
HMF000934	HMF000934A	602.75	305.548	441.547	1997.99	188.275	0	0	0	0	0	0	0	105.633	0	0	203.254	308.384	253.148	0	0	0	311.888	0	0	0	0	0	0	0	226.241	0	0	0	0	0	665.328	0	0	0	0	0	0	0	0	0	0	0	0
HMF003633	HMF003633A	820.996	519.489	1073.54	1114.89	201.598	0	0	0	0	0	0	0	256.829	0	0	494.176	437.33	430.399	0	0	0	253.27	0	0	0	0	0	0	0	242.251	0	0	0	0	0	681.572	0	0	0	0	0	0	0	0	0	0	0	0
HMF001928	HMF001928A	281.097	336.011	820.178	1472.75	0	0	0	0	0	0	0	0	196.215	0	0	377.547	374.963	278.387	0	0	0	186.729	0	0	0	0	0	0	0	0	0	0	0	0	0	654.053	0	0	0	0	0	0	0	0	0	0	0	0
HMF001886	HMF001886A	792.232	796.01	1276.08	2240.24	0	0	0	0	0	0	0	0	305.282	0	0	587.407	563.309	659.498	0	0	0	477.838	0	0	0	0	0	0	0	0	0	0	0	0	0	1242.58	0	0	0	0	0	0	0	0	0	0	0	0
HMF002624	HMF002624A	492.748	553.204	635.837	1156.76	630.712	0	0	0	0	0	0	0	152.114	0	0	292.69	333.006	458.332	0	0	0	421.139	0	0	0	0	0	0	0	757.896	0	0	0	0	0	860.807	0	0	0	0	0	0	0	0	0	0	0	0
HMF004110	HMF004110A	573.64	170.103	482.638	509.237	237.193	0	0	0	0	0	0	0	115.464	0	0	222.169	532.202	140.931	0	0	0	258.612	0	0	0	0	0	0	0	285.024	0	0	0	0	0	872.692	0	0	0	0	0	0	0	0	0	0	0	0
HMF000134	HMF000134A	867.146	1784.22	940.762	0	0	0	0	0	0	0	0	0	225.063	0	0	433.054	3096.45	1478.23	0	0	0	0	0	0	0	0	0	0	0	0	0	0	0	0	0	0	0	0	0	0	0	0	0	0	0	0	0	0
HMF003506	HMF003506A	417.055	107.463	112.077	121.808	102	0	0	0	0	0	0	0	26.8128	0	0	51.5917	93.2359	89.0338	0	0	0	0	0	0	0	0	0	0	0	122.568	0	0	0	0	0	196.998	0	0	0	0	0	0	0	0	0	0	0	0
HMF001953	HMF001953A	752.822	367.406	780.791	1452.81	304.45	0	0	0	0	0	0	0	186.793	0	0	359.416	618.965	304.397	0	0	0	252.115	0	0	0	0	0	0	0	365.843	0	0	0	0	0	1385.37	0	0	0	0	0	0	0	0	0	0	0	0
HMF000631	HMF000631A	3781.55	0	0	0	0	0	0	0	0	0	0	0	0	0	0	0	0	0	0	0	0	0	0	0	0	0	0	0	0	0	0	0	0	0	0	21243.7	0	0	0	0	0	0	0	0	0	0	0	0
HMF001686	HMF001686A	740.842	344.674	867.702	1554.42	178.769	0	0	0	0	0	0	0	207.585	0	0	399.423	260.565	285.564	0	0	0	280.992	0	0	0	0	0	0	0	214.818	0	0	0	0	0	937.138	0	0	0	0	0	0	0	0	0	0	0	0
HMF002867	HMF002867A	383.964	289.554	529.206	1274.38	351.749	0	0	0	0	0	0	0	126.605	0	0	243.606	187.983	239.897	0	0	0	117.989	0	0	0	0	0	0	0	422.679	0	0	0	0	0	535.95	0	0	0	0	0	0	0	0	0	0	0	0
HMF003359	HMF003359A	214.132	282.372	499.261	1142.2	336.092	0	0	0	0	0	0	0	119.441	0	0	229.821	202.125	233.946	0	0	0	160.099	0	0	0	0	0	0	0	403.865	0	0	0	0	0	519.32	0	0	0	0	0	0	0	0	0	0	0	0
HMF003788	HMF003788A	385.744	315.346	655.847	928.29	253.026	0	0	0	0	0	0	0	156.902	0	0	301.901	235.454	261.266	0	0	0	114.721	0	0	0	0	0	0	0	304.049	0	0	0	0	0	449.868	0	0	0	0	0	0	0	0	0	0	0	0
HMF004114	HMF004114A	576	406.07	603.981	1915	391.524	0	0	0	0	0	0	0	144.493	0	0	278.026	329.5	336.43	0	0	0	244	0	0	0	0	0	0	0	470.476	0	0	0	0	0	473	0	0	0	0	0	0	0	0	0	0	0	0
HMF002899	HMF002899A	646.84	635.553	643.741	2136.62	121.564	0	0	0	0	0	0	0	154.005	0	0	296.329	290.653	526.558	0	0	0	285.15	0	0	0	0	0	0	0	146.077	0	0	0	0	0	707.872	0	0	0	0	0	0	0	0	0	0	0	0
HMF004175	HMF004175A	594.964	777.046	1878	1207.38	461.19	0	0	0	0	0	0	0	449.282	0	0	864.483	722.635	643.786	0	0	0	365.556	0	0	0	0	0	0	0	554.189	0	0	0	0	0	1416.34	0	0	0	0	0	0	0	0	0	0	0	0
HMF004356	HMF004356A	278.075	202.129	469.25	850.316	272.476	0	0	0	0	0	0	0	112.261	0	0	216.006	237.344	167.465	0	0	0	208.179	0	0	0	0	0	0	0	327.422	0	0	0	0	0	701.473	0	0	0	0	0	0	0	0	0	0	0	0
HMF004266	HMF004266A	876.81	392.635	643.779	1365.93	265.501	0	0	0	0	0	0	0	154.014	0	0	296.346	314.253	325.3	0	0	0	210.834	0	0	0	0	0	0	0	319.039	0	0	0	0	0	789.379	0	0	0	0	0	0	0	0	0	0	0	0
HMF001591	HMF001591A	543.835	244.114	822.905	1236.12	260.861	0	0	0	0	0	0	0	196.868	0	0	378.802	267.919	202.25	0	0	0	176.446	0	0	0	0	0	0	0	313.464	0	0	0	0	0	763.768	0	0	0	0	0	0	0	0	0	0	0	0
HMF002718	HMF002718A	261.21	300.487	477.567	0	518.665	0	0	0	0	0	0	0	114.251	0	0	219.835	338.773	248.955	0	0	0	193.155	0	0	0	0	0	0	0	623.254	0	0	0	0	0	627.505	0	0	0	0	0	0	0	0	0	0	0	0
HMF001907	HMF001907A	379.435	175.292	477.942	922.126	329.035	0	0	0	0	0	0	0	114.34	0	0	220.007	418.376	145.23	0	0	0	256.118	0	0	0	0	0	0	0	395.385	0	0	0	0	0	750.881	0	0	0	0	0	0	0	0	0	0	0	0
HMF001203	HMF001203A	538.638	644.888	1386.75	781.1	0	0	0	0	0	0	0	0	331.758	0	0	638.35	677.188	534.292	0	0	0	481.411	0	0	0	0	0	0	0	0	0	0	0	0	0	1310.7	0	0	0	0	0	0	0	0	0	0	0	0
HMF002706	HMF002706A	0	374.61	1552.95	291.703	475.201	0	0	0	0	0	0	0	371.521	0	0	714.859	736.512	310.366	0	0	0	248.172	0	0	0	0	0	0	0	571.026	0	0	0	0	0	1712.69	0	0	0	0	0	0	0	0	0	0	0	0
HMF002797	HMF002797A	457.235	509.421	703.486	859.942	346.964	0	0	0	0	0	0	0	168.298	0	0	323.83	752.387	422.058	0	0	0	885.955	0	0	0	0	0	0	0	416.929	0	0	0	0	0	1789.42	0	0	0	0	0	0	0	0	0	0	0	0
HMF002819	HMF002819A	138.829	210.568	362.588	431.468	139.269	0	0	0	0	0	0	0	86.7438	0	0	166.908	293.638	174.457	0	0	0	411.992	0	0	0	0	0	0	0	167.353	0	0	0	0	0	842.461	0	0	0	0	0	0	0	0	0	0	0	0
HMF000944	HMF000944A	441.178	205.127	539.499	338.019	203.342	0	0	0	0	0	0	0	129.067	0	0	248.343	239.368	169.949	0	0	0	87.6347	0	0	0	0	0	0	0	244.346	0	0	0	0	0	399.614	0	0	0	0	0	0	0	0	0	0	0	0
HMF001870	HMF001870A	271.639	264.833	438.574	1007.52	263.801	0	0	0	0	0	0	0	104.922	0	0	201.885	437.223	219.415	0	0	0	241.624	0	0	0	0	0	0	0	316.996	0	0	0	0	0	495.253	0	0	0	0	0	0	0	0	0	0	0	0
HMF000428	HMF000428A	296.397	327.203	655.826	752.739	465.171	0	0	0	0	0	0	0	156.896	0	0	301.891	499.827	271.089	0	0	0	477.834	0	0	0	0	0	0	0	558.974	0	0	0	0	0	967.165	0	0	0	0	0	0	0	0	0	0	0	0
HMF001843	HMF001843A	505.618	225.82	445.808	0	671.664	0	0	0	0	0	0	0	106.653	0	0	205.215	298.661	187.093	0	0	0	114.754	0	0	0	0	0	0	0	807.106	0	0	0	0	0	1209.68	0	0	0	0	0	0	0	0	0	0	0	0
HMF004198	HMF004198A	936.793	1273.29	3544.34	772.066	0	0	0	0	0	0	0	0	847.931	0	0	1631.54	1073.48	1054.93	0	0	0	898.24	0	0	0	0	0	0	0	0	0	0	0	0	0	1330.34	0	0	0	0	0	0	0	0	0	0	0	0
HMF003809	HMF003809A	417.764	0	151.997	0	194.333	0	0	0	0	0	0	0	36.3629	0	0	69.9675	0	0	0	0	0	0	0	0	0	0	0	0	0	233.521	0	0	0	0	0	263.373	0	0	0	0	0	0	0	0	0	0	0	0
HMF001797	HMF001797A	5081.56	1544.05	0	0	0	0	0	0	0	0	0	0	0	0	0	0	0	1279.26	0	0	0	0	0	0	0	0	0	0	0	0	0	0	0	0	0	59031	0	0	0	0	0	0	0	0	0	0	0	0
HMF003761	HMF003761A	297.5	323.488	536.61	515.5	279.109	0	0	0	0	0	0	0	128.376	0	0	247.014	330.5	268.012	0	0	0	194	0	0	0	0	0	0	0	335.391	0	0	0	0	0	659.5	0	0	0	0	0	0	0	0	0	0	0	0
HMF004233	HMF004233A	610.74	837.487	1838.81	1988.65	239.945	0	0	0	0	0	0	0	439.909	0	0	846.448	625.234	693.862	0	0	0	559.762	0	0	0	0	0	0	0	288.33	0	0	0	0	0	993.577	0	0	0	0	0	0	0	0	0	0	0	0
HMF002729	HMF002729A	1095.93	0	2110.41	0	0	0	0	0	0	0	0	0	878.309	0	0	0	652.595	1996.12	202.184	0	0	145.132	0	0	0	0	0	0	0	0	0	0	0	0	0	845.033	0	0	0	0	0	0	0	0	0	0	0	0
HMF000270	HMF000270A	483.13	0	835.238	0	0	0	0	0	0	0	0	0	347.608	0	0	0	1098.25	913.574	924.051	0	0	0	0	1057.7	0	0	0	0	0	0	0	0	0	0	0	324.254	2224.53	852.47	3337.8	0	0	0	0	0	0	1788.53	0	0
HMF001979	HMF001979A	52.1037	0	0	0	0	0	0	0	0	0	0	0	0	0	0	0	69.7283	100.105	40.2875	0	0	58.3652	0	48.5516	0	0	0	0	0	0	0	0	0	0	0	32.7	0	0	84.707	0	0	0	0	0	0	0	0	0
HMF000700	HMF000700A	402.798	0	598.343	583.972	0	0	0	0	0	0	0	0	249.018	0	0	0	224.257	627.093	470.589	0	0	0	0	3630.26	0	0	0	0	0	0	0	0	0	0	0	463.651	0	0	702.873	0	0	0	0	0	0	863.415	0	0
HMF001395	HMF001395A	590.226	0	410.448	1320.47	0	0	0	0	0	0	0	0	170.819	0	0	599.76	918.132	1060.63	350.36	0	0	536.785	0	735.705	0	0	0	0	0	0	0	0	0	0	0	475.793	0	0	1222.51	0	0	0	0	0	0	786.185	0	0
HMF000749	HMF000749A	352.451	0	1505.08	1512.7	0	0	0	0	0	0	0	0	626.384	0	0	832.511	437.48	831.143	709.657	0	0	551.845	0	1003.31	0	0	0	0	0	0	0	0	0	0	0	0	400.524	370.06	1152.63	0	0	0	0	0	0	1283.97	0	0
HMF001811	HMF001811A	374.788	0	612.732	0	0	0	0	0	0	0	0	0	255.006	0	0	0	358.545	588.538	748.725	0	0	148.138	0	208.9	0	0	0	0	0	0	0	0	0	0	0	424.151	705.037	0	2650.42	0	0	0	0	0	0	559.41	0	0
HMF000484	HMF000484A	463.645	0	715.516	1539.73	0	0	0	0	0	0	0	0	297.782	0	0	0	671.191	866.673	668.186	0	0	247.94	0	1549.25	0	0	0	0	0	0	0	0	0	0	0	325.621	384.182	496.381	837.486	0	0	0	0	0	0	1864.81	0	0
HMF003373	HMF003373A	197.615	0	182	512.485	0	0	0	0	0	0	0	0	75.7443	0	0	953.902	279.765	466.013	284.769	0	0	275.761	0	327.31	0	0	0	0	0	0	0	0	0	0	0	0	249.236	0	233.721	0	0	0	0	0	0	485.459	0	0
HMF003194	HMF003194A	662.179	0	2099.84	0	0	0	0	0	0	0	0	0	873.909	0	0	0	278.946	1215.38	0	0	0	109.675	0	0	0	0	0	0	0	0	0	0	0	0	0	497.238	0	0	0	0	0	0	0	0	0	0	0	0
HMF000259	HMF000259A	457.124	0	651.483	0	0	0	0	0	0	0	0	0	271.133	0	0	0	196.151	870.112	644.062	0	0	130.43	0	162.279	0	0	0	0	0	0	0	0	0	0	0	298.592	256.311	220.922	0	0	0	0	0	0	0	471.672	0	0
HMF002635	HMF002635A	366.279	0	751.643	2352.52	0	0	0	0	0	0	0	0	312.818	0	0	0	954.913	863.753	925.901	0	0	1534.66	0	1258.54	0	0	0	0	0	0	0	0	0	0	0	0	846.866	985.426	1488.14	0	0	0	0	0	0	1923.33	0	0
HMF002190	HMF002190A	439.901	0	861.563	1762.63	0	0	0	0	0	0	0	0	358.564	0	0	422.333	1723.74	751.405	587.376	0	0	783.833	0	1117.91	0	0	0	0	0	0	0	0	0	0	0	410.766	679.123	1133.37	1958.09	0	0	0	0	0	0	1356.75	0	0
HMF003516	HMF003516A	240.791	0	173.472	0	0	0	0	0	0	0	0	0	72.1955	0	0	276.944	0	423.312	187.656	0	0	113.502	0	130.653	0	0	0	0	0	0	0	0	0	0	0	207.589	0	0	155.371	0	0	0	0	0	0	490.327	0	0
HMF002920	HMF002920A	581.983	0	358.695	1899.91	0	0	0	0	0	0	0	0	149.281	0	0	0	720.465	1372.42	468.477	0	0	294.986	0	886.457	0	0	0	0	0	0	0	0	0	0	0	0	0	275.987	900.457	0	0	0	0	0	0	821.461	0	0
HMF001565	HMF001565A	461.454	0	803.841	1401.51	0	0	0	0	0	0	0	0	334.541	0	0	489.305	521.758	736.635	935.67	0	0	560.204	0	840.306	0	0	0	0	0	0	0	0	0	0	0	504.99	814.842	587.665	1852.37	0	0	0	0	0	0	1542.81	0	0
HMF004024	HMF004024A	544.61	0	2157.74	1139.65	0	0	0	0	0	0	0	0	898.004	0	0	0	649.87	748.642	434.247	0	0	524.299	0	840.479	0	0	0	0	0	0	0	0	0	0	0	769.424	331.689	399.227	1249.71	0	0	0	0	0	0	1094.62	0	0
HMF001588	HMF001588A	314.949	0	1820.02	443.683	0	0	0	0	0	0	0	0	757.452	0	0	0	1149.27	610.818	283.436	0	0	1127.24	0	0	0	0	0	0	0	0	0	0	0	0	0	189.45	0	892.374	962.482	0	0	0	0	0	0	0	0	0
HMF002675	HMF002675A	640.236	0	634.05	2771.08	0	0	0	0	0	0	0	0	263.878	0	0	0	1364.21	1288.58	724.265	0	0	416.089	0	1070.59	0	0	0	0	0	0	0	0	0	0	0	317.763	0	864.3	1472.12	0	0	0	0	0	0	2015.7	0	0
HMF000217	HMF000217A	620.631	0	2605.65	3201.26	0	0	0	0	0	0	0	0	1084.42	0	0	0	672.739	1463.56	1269.01	0	0	843.173	0	1652.36	0	0	0	0	0	0	0	0	0	0	0	0	0	672.739	823.181	0	0	0	0	0	0	1502.42	0	0
HMF000048	HMF000048A	321.138	0	1257.39	1746.24	0	0	0	0	0	0	0	0	523.299	0	0	1019.68	836.416	501.788	1197.45	0	0	940.78	0	1336.27	0	0	0	0	0	0	0	0	0	0	0	367.031	1199.94	930.793	3736.16	0	0	0	0	0	0	1971.44	0	0
HMF003672	HMF003672A	362.23	0	610.695	0	0	0	0	0	0	0	0	0	254.158	0	0	916.052	470.324	645.385	499.437	0	0	0	0	397.04	0	0	0	0	0	0	0	0	0	0	0	299.956	455.767	372.946	1120.34	0	0	0	0	0	0	568.203	0	0
HMF000757	HMF000757A	711.535	0	644.536	2066.66	0	0	0	0	0	0	0	0	268.242	0	0	0	1460.65	1677.93	277.192	0	0	1289.72	0	624.057	0	0	0	0	0	0	0	0	0	0	0	0	0	1211.52	1062.65	0	0	0	0	0	0	0	0	0
HMF003117	HMF003117A	407.994	0	331.223	1094.16	0	0	0	0	0	0	0	0	137.848	0	0	0	457.532	628.837	626.097	0	0	388.301	0	739.978	0	0	0	0	0	0	0	0	0	0	0	478.745	0	288.968	1390.16	0	0	0	0	0	0	986.805	0	0
HMF000860	HMF000860A	650.928	0	315.404	641.586	0	0	0	0	0	0	0	0	131.264	0	0	0	160.521	1414.97	0	0	0	72.2844	0	162.515	0	0	0	0	0	0	0	0	0	0	0	172.43	193.423	0	0	0	0	0	0	0	0	0	0	0
HMF000142	HMF000142A	175.715	0	1326.64	3290.47	0	0	0	0	0	0	0	0	552.121	0	0	0	1261.52	0	1802.17	0	0	826.997	0	1867.25	0	0	0	0	0	0	0	0	0	0	0	595.214	1585.41	748.903	3456.67	0	0	0	0	0	0	3200.86	0	0
HMF003209	HMF003209A	462.12	0	302.024	2755.97	0	0	0	0	0	0	0	0	125.696	0	0	0	779.578	573.37	489.108	0	0	1079.03	0	990.693	0	0	0	0	0	0	0	0	0	0	0	741.767	0	753.126	1407.93	0	0	0	0	0	0	1868.59	0	0
HMF003601	HMF003601A	387.693	0	581.879	398.489	0	0	0	0	0	0	0	0	242.166	0	0	461.144	645.602	552.966	527.308	0	0	1224.04	0	683.195	0	0	0	0	0	0	0	0	0	0	0	518.963	1076.17	0	475.179	0	0	0	0	0	0	1573.4	0	0
HMF001143	HMF001143A	648.458	0	720.537	971.292	0	0	0	0	0	0	0	0	299.872	0	0	1641.37	597.911	1529.18	612.947	0	0	0	0	687.623	0	0	0	0	0	0	0	0	0	0	0	0	0	507.698	866.545	0	0	0	0	0	0	722.205	0	0
HMF000153	HMF000153A	940.524	0	691.924	0	0	0	0	0	0	0	0	0	287.964	0	0	0	233.402	1477.92	0	0	0	108.653	0	0	0	0	0	0	0	0	0	0	0	0	0	1062.97	0	0	150.404	0	0	0	0	0	0	0	0	0
HMF002918	HMF002918A	529.602	0	915.146	931.412	0	0	0	0	0	0	0	0	380.864	0	0	0	273.826	1085.73	376.196	0	0	385.273	0	386.786	0	0	0	0	0	0	0	0	0	0	0	234.385	0	209.278	609.679	0	0	0	0	0	0	515.882	0	0
HMF003366	HMF003366A	530.458	0	686.32	475.976	0	0	0	0	0	0	0	0	285.631	0	0	0	1122.44	1077.85	524.474	0	0	301.985	0	757.462	0	0	0	0	0	0	0	0	0	0	0	248.595	0	408.479	847.457	0	0	0	0	0	0	914.954	0	0
HMF003662	HMF003662A	423.13	0	1791.9	830.684	0	0	0	0	0	0	0	0	745.749	0	0	0	975.477	681.13	265.538	0	0	891.808	0	568.152	0	0	0	0	0	0	0	0	0	0	0	454.901	1168.87	614.245	984.496	0	0	0	0	0	0	541.598	0	0
HMF004095	HMF004095A	616.636	0	529.102	0	0	0	0	0	0	0	0	0	220.201	0	0	0	0	1006.86	106.469	0	0	88.8918	0	0	0	0	0	0	0	0	0	0	0	0	0	642.494	0	0	0	0	0	0	0	0	0	0	0	0
HMF000751	HMF000751A	301.64	0	872.067	0	0	0	0	0	0	0	0	0	362.936	0	0	0	2208.37	711.323	1502.15	0	0	848.563	0	0	0	0	0	0	0	0	0	0	0	0	0	0	938.782	10449.4	2344.2	0	0	0	0	0	0	0	0	0
HMF000680	HMF000680A	502.401	0	590.1	866.323	0	0	0	0	0	0	0	0	245.587	0	0	0	1823.04	936.681	0	0	0	353.058	0	446.972	0	0	0	0	0	0	0	0	0	0	0	356.34	0	695.569	976.81	0	0	0	0	0	0	0	0	0
HMF002009	HMF002009A	397.528	0	451.374	2378.34	0	0	0	0	0	0	0	0	187.852	0	0	559.698	539.691	937.444	827.792	0	0	863.305	0	901.318	0	0	0	0	0	0	0	0	0	0	0	0	805.284	402.642	1359.98	0	0	0	0	0	0	1875.16	0	0
HMF002466	HMF002466A	535.123	0	1155.93	2067.3	0	0	0	0	0	0	0	0	481.074	0	0	0	715.661	848.078	774.926	0	0	501.013	0	1306.32	0	0	0	0	0	0	0	0	0	0	0	594.455	0	816.76	986.587	0	0	0	0	0	0	1860.12	0	0
HMF003615	HMF003615A	499.709	0	363.993	1000.4	0	0	0	0	0	0	0	0	151.486	0	0	440.336	424.306	923.417	270.514	0	0	303.576	0	616.671	0	0	0	0	0	0	0	0	0	0	0	366.272	377.717	407.273	547.039	0	0	0	0	0	0	1418.69	0	0
HMF001420	HMF001420A	400.541	0	414.002	538.654	0	0	0	0	0	0	0	0	172.299	0	0	225.191	566.239	841.033	323.995	0	0	768.861	0	246.758	0	0	0	0	0	0	0	0	0	0	0	148.695	282.869	521.602	378.161	0	0	0	0	0	0	617.396	0	0
HMF001768	HMF001768A	469.732	0	772.149	1667.03	0	0	0	0	0	0	0	0	321.352	0	0	457.919	665.609	1107.71	449.912	0	0	601.05	0	602.552	0	0	0	0	0	0	0	0	0	0	0	0	501.96	0	561.514	0	0	0	0	0	0	1134.54	0	0
HMF002320	HMF002320A	516.303	0	1673.5	1327	0	0	0	0	0	0	0	0	696.473	0	0	0	819.224	1010.23	254.139	0	0	0	0	404.629	0	0	0	0	0	0	0	0	0	0	0	297.783	0	560.6	1430.15	0	0	0	0	0	0	0	0	0
HMF003987	HMF003987A	503.859	0	520.786	466.148	0	0	0	0	0	0	0	0	216.74	0	0	0	543.756	993.619	407.567	0	0	984.87	0	998.388	0	0	0	0	0	0	0	0	0	0	0	279.493	264.368	694.466	519.723	0	0	0	0	0	0	936.302	0	0
HMF000927	HMF000927A	362.731	0	987.257	3774.21	0	0	0	0	0	0	0	0	410.875	0	0	0	710.321	495.64	1426.65	0	0	1007.96	0	1861.84	0	0	0	0	0	0	0	0	0	0	0	516.751	1435.65	977.442	3674.16	0	0	0	0	0	0	2247.02	0	0
HMF003425	HMF003425A	436.861	0	669.842	717.709	0	0	0	0	0	0	0	0	278.774	0	0	440.322	450.318	759.143	477.307	0	0	689.721	0	764.191	0	0	0	0	0	0	0	0	0	0	0	389.353	625.247	324.369	0	0	0	0	0	0	0	1293.48	0	0
HMF003542	HMF003542A	417.049	0	513.109	0	0	0	0	0	0	0	0	0	213.545	0	0	0	130.617	804.062	284.256	0	0	78.0702	0	154.639	0	0	0	0	0	0	0	0	0	0	0	257.718	0	0	364.828	0	0	0	0	0	0	0	0	0
HMF000248	HMF000248A	1041.04	0	374.442	838.6	0	0	0	0	0	0	0	0	155.835	0	0	0	251.078	2454.97	659.33	0	0	269.658	0	490.104	0	0	0	0	0	0	0	0	0	0	0	0	0	492.113	382.14	0	0	0	0	0	0	268.653	0	0
HMF003787	HMF003787A	1542.68	588.167	979.108	5931.47	1906.02	0	0	0	0	0	0	0	0	0	0	0	325.7	1624.99	0	0	0	361.218	0	0	0	0	0	0	0	0	683.519	0	0	0	0	0	0	0	0	0	0	0	0	0	0	0	0	0
HMF002238	HMF002238A	2031.96	5999.88	13779.7	89008	13107.7	0	0	0	0	0	0	0	2797.94	0	0	0	0	8208.83	0	0	0	5045.54	0	0	0	0	0	0	0	0	6340.37	0	0	0	0	0	0	0	0	0	0	0	0	0	0	0	0	0
HMF003439	HMF003439A	2799.35	2642.53	2020.23	62897.3	7295.3	0	0	0	0	0	0	0	2835.81	0	0	0	0	7214.89	0	0	0	3910.06	0	0	0	0	0	0	0	0	3936.57	0	0	0	0	0	0	0	0	0	0	0	0	0	0	0	0	0
HMF000059	HMF000059A	3982.84	2164.45	3302.26	12499.2	1062.69	0	0	0	0	0	0	0	0	0	0	0	1858.46	2538.54	0	0	0	964.694	0	0	0	0	0	0	0	0	604.462	0	0	0	0	0	0	0	0	0	0	0	0	0	0	0	0	0
HMF000854	HMF000854A	1524.77	15694.2	0	30909.7	4321.11	0	0	0	0	0	0	0	7837.13	0	0	0	4089.37	8314.09	0	0	0	2503.97	0	0	0	0	0	0	0	0	1970.77	0	0	0	0	0	0	0	0	0	0	0	0	0	0	0	0	0
HMF003769	HMF003769A	3076.45	2047.62	2629.44	902.251	0	0	0	0	0	0	0	0	4155.89	0	0	0	570.288	2071.18	0	0	0	147.119	0	0	0	0	0	0	0	0	339.767	0	0	0	0	0	0	0	0	0	0	0	0	0	0	0	0	0
HMF003554	HMF003554A	5870.64	310.801	0	1127.1	0	0	0	0	0	0	0	0	0	0	0	0	1169.52	1229.17	0	0	0	183.782	0	0	0	0	0	0	0	0	0	0	0	0	0	0	0	0	0	0	0	0	0	0	0	0	0	0
HMF000066	HMF000066A	0	3244.98	7749.68	40186	13401.2	0	0	0	0	0	0	0	2464.97	0	0	0	0	8015.51	0	0	0	2574.39	0	0	0	0	0	0	0	0	7352.43	0	0	0	0	0	0	0	0	0	0	0	0	0	0	0	0	0
HMF003138	HMF003138A	864.511	1251.84	0	20552.5	5600.35	0	0	0	0	0	0	0	480.672	0	0	0	0	3217.46	0	0	0	1203	0	0	0	0	0	0	0	0	2348.46	0	0	0	0	0	0	0	0	0	0	0	0	0	0	0	0	0
HMF002816	HMF002816A	2186.6	1786.01	796.132	0	490.663	0	0	0	0	0	0	0	491.67	0	0	0	316.541	2157.91	0	0	0	0	0	0	0	0	0	0	0	0	227.97	0	0	0	0	0	0	0	0	0	0	0	0	0	0	0	0	0
HMF001288	HMF001288B	1710.22	0	301.714	587.485	505.384	0	0	0	0	0	0	0	0	0	0	0	537.223	326.983	0	0	0	95.794	0	0	0	0	0	0	0	0	230.455	0	0	0	0	0	0	0	0	0	0	0	0	0	0	0	0	0
HMF001566	HMF001566A	967.906	3604.01	0	0	0	0	0	0	0	0	0	0	24928	0	0	0	0	0	0	0	0	0	0	0	0	0	0	0	0	0	0	0	0	0	0	0	0	0	0	0	0	0	0	0	0	0	0	0
HMF003080	HMF003080A	2418.1	873.464	5971.25	453.688	685.119	0	0	0	0	0	0	0	3001.57	0	0	0	1085.23	2844.61	0	0	0	73.9775	0	0	0	0	0	0	0	0	575.001	0	0	0	0	0	0	0	0	0	0	0	0	0	0	0	0	0
HMF003132	HMF003132B	2455.99	3342.07	20470.4	13350.1	14625.3	0	0	0	0	0	0	0	0	0	0	0	6005.82	6839.83	0	0	0	870.707	0	0	0	0	0	0	0	0	4610.12	0	0	0	0	0	0	0	0	0	0	0	0	0	0	0	0	0
HMF003897	HMF003897A	4050.69	1478.83	0	318.74	0	0	0	0	0	0	0	0	4069.8	0	0	0	476.344	1230.35	0	0	0	51.9732	0	0	0	0	0	0	0	0	0	0	0	0	0	0	0	0	0	0	0	0	0	0	0	0	0	0
HMF002855	HMF002855A	3762.21	1452.78	4434.5	2901.81	0	0	0	0	0	0	0	0	704.35	0	0	0	559.072	1169.74	0	0	0	473.163	0	0	0	0	0	0	0	0	267.012	0	0	0	0	0	0	0	0	0	0	0	0	0	0	0	0	0
HMF001784	HMF001784A	0	3018.91	4560.35	36184.3	7684.21	0	0	0	0	0	0	0	3552.21	0	0	0	1116.1	5340.56	0	0	0	2018.39	0	0	0	0	0	0	0	0	3363.78	0	0	0	0	0	0	0	0	0	0	0	0	0	0	0	0	0
HMF002781	HMF002781A	728.919	1407.27	6510.71	18221	1734.19	0	0	0	0	0	0	0	1879.37	0	0	0	2164.23	7487.94	0	0	0	1093.38	0	0	0	0	0	0	0	0	2004.03	0	0	0	0	0	0	0	0	0	0	0	0	0	0	0	0	0
HMF000161	HMF000161A	0	3291.3	6473.07	11318.6	8386.03	0	0	0	0	0	0	0	6921.17	0	0	0	2366.57	5935.94	0	0	0	457.225	0	0	0	0	0	0	0	0	3822.92	0	0	0	0	0	0	0	0	0	0	0	0	0	0	0	0	0
HMF000347	HMF000347A	0	3927.06	1935.57	52724.9	7486.17	0	0	0	0	0	0	0	3619.02	0	0	0	0	6092.28	0	0	0	3100.54	0	0	0	0	0	0	0	0	3298.01	0	0	0	0	0	0	0	0	0	0	0	0	0	0	0	0	0
HMF003648	HMF003648A	1568.68	724.785	238.23	0	309.901	0	0	0	0	0	0	0	0	0	0	0	153.941	563.273	0	0	0	0	0	0	0	0	0	0	0	0	0	0	0	0	0	0	0	0	0	0	0	0	0	0	0	0	0	0
HMF003462	HMF003462A	1383.83	2642.96	3760.84	7272.86	6439.36	0	0	0	0	0	0	0	0	0	0	0	896.011	6767.91	0	0	0	1185.9	0	0	0	0	0	0	0	0	2493.2	0	0	0	0	0	0	0	0	0	0	0	0	0	0	0	0	0
HMF002136	HMF002136A	0	2389.08	7852.06	24982.5	19871	0	0	0	0	0	0	0	3734.19	0	0	0	1340.61	9920.5	0	0	0	2597.99	0	0	0	0	0	0	0	0	5850.65	0	0	0	0	0	0	0	0	0	0	0	0	0	0	0	0	0
HMF002400	HMF002400B	0	2557.85	0	24226.1	14314.8	0	0	0	0	0	0	0	0	0	0	0	0	9448.15	0	0	0	467.154	0	0	0	0	0	0	0	0	4708.07	0	0	0	0	0	0	0	0	0	0	0	0	0	0	0	0	0
HMF002893	HMF002893A	0	3494.29	3343.32	69661.2	6918.59	0	0	0	0	0	0	0	6297.72	0	0	0	0	5589.86	0	0	0	4108.85	0	0	0	0	0	0	0	0	3004.89	0	0	0	0	0	0	0	0	0	0	0	0	0	0	0	0	0
HMF000666	HMF000666B	1210.54	1816.81	2178.98	5774.7	6720.01	0	0	0	0	0	0	0	0	0	0	0	3456.05	4716.62	0	0	0	216.983	0	0	0	0	0	0	0	0	2454.1	0	0	0	0	0	0	0	0	0	0	0	0	0	0	0	0	0
HMF000094	HMF000094A	1114.39	696.992	479.025	5479.52	2048.38	0	0	0	0	0	0	0	0	0	0	0	235.003	1587.9	0	0	0	400.069	0	0	0	0	0	0	0	0	837.292	0	0	0	0	0	0	0	0	0	0	0	0	0	0	0	0	0
HMF002736	HMF002736A	1138.23	555.319	1090.57	0	324.563	0	0	0	0	0	0	0	1016.33	0	0	0	266.874	468.535	0	0	0	0	0	0	0	0	0	0	0	0	482.581	0	0	0	0	0	0	0	0	0	0	0	0	0	0	0	0	0
HMF003411	HMF003411A	1153.44	2112.73	2468.1	17412.9	11416.6	0	0	0	0	0	0	0	748.664	0	0	0	0	2393.73	0	0	0	635.924	0	0	0	0	0	0	0	0	3902.54	0	0	0	0	0	0	0	0	0	0	0	0	0	0	0	0	0
HMF003085	HMF003085A	0	3639.93	6460.6	40721	9821.12	0	0	0	0	0	0	0	3367.01	0	0	0	2208.85	3646.93	0	0	0	3520.52	0	0	0	0	0	0	0	0	2790.68	0	0	0	0	0	0	0	0	0	0	0	0	0	0	0	0	0
HMF001742	HMF001742A	0	1925.66	1924.16	50246.5	5698.37	0	0	0	0	0	0	0	3483.81	0	0	0	2591.58	8741.08	0	0	0	3234.9	0	0	0	0	0	0	0	0	2928.05	0	0	0	0	0	0	0	0	0	0	0	0	0	0	0	0	0
HMF000909	HMF000909A	1977.78	2584.02	11880.7	15750.4	8118.22	0	0	0	0	0	0	0	0	0	0	0	970.885	8611.91	0	0	0	1280.37	0	0	0	0	0	0	0	0	4089.62	0	0	0	0	0	0	0	0	0	0	0	0	0	0	0	0	0
HMF003700	HMF003700A	2914.05	2198.55	0	54136.9	3541.49	0	0	0	0	0	0	0	1108.28	0	0	0	1412.99	11715.2	0	0	0	3527.19	0	0	0	0	0	0	0	0	2524.28	0	0	0	0	0	0	0	0	0	0	0	0	0	0	0	0	0
HMF000600	HMF000600A	3095.19	2395.86	2145.06	343.471	0	0	0	0	0	0	0	0	223.767	0	0	0	1221.46	0	0	0	0	56.0057	0	0	0	0	0	0	0	0	0	0	0	0	0	0	0	0	0	0	0	0	0	0	0	0	0	0
HMF000835	HMF000835B	0	2539.6	3830.41	28390.2	12541	0	0	0	0	0	0	0	3109.24	0	0	0	0	3673.37	0	0	0	720.227	0	0	0	0	0	0	0	0	5395.79	0	0	0	0	0	0	0	0	0	0	0	0	0	0	0	0	0
HMF001661	HMF001661A	1855.29	1687.45	6712.72	3930.45	5229.69	0	0	0	0	0	0	0	0	0	0	0	691.413	3651.96	0	0	0	640.891	0	0	0	0	0	0	0	0	1381.82	0	0	0	0	0	0	0	0	0	0	0	0	0	0	0	0	0
HMF001393	HMF001393A	0	2367.57	0	33948.8	12738.5	0	0	0	0	0	0	0	1355.97	0	0	0	0	3761.03	0	0	0	2336.04	0	0	0	0	0	0	0	0	4654.68	0	0	0	0	0	0	0	0	0	0	0	0	0	0	0	0	0
HMF000203	HMF000203B	1251.76	1465.97	4147.67	7026.04	9498.05	0	0	0	0	0	0	0	3328.85	0	0	0	721.225	4955.48	0	0	0	330.357	0	0	0	0	0	0	0	0	3074.59	0	0	0	0	0	0	0	0	0	0	0	0	0	0	0	0	0
HMF000448	HMF000448A	1213.9	9700.67	0	21696.6	4860.1	0	0	0	0	0	0	0	8086.15	0	0	0	2750.3	7819.23	0	0	0	1657.98	0	0	0	0	0	0	0	0	2310.11	0	0	0	0	0	0	0	0	0	0	0	0	0	0	0	0	0
HMF000293	HMF000293A	1139.62	2909.52	385.87	0	1895.36	0	0	0	0	0	0	0	8524.13	0	0	0	240.919	679.271	0	0	0	0	0	0	0	0	0	0	0	0	563.31	0	0	0	0	0	0	0	0	0	0	0	0	0	0	0	0	0
HMF001648	HMF001648A	3295.96	1333.5	0	25599.4	5462.58	0	0	0	0	0	0	0	902.173	0	0	0	0	4216.65	0	0	0	1777.07	0	0	0	0	0	0	0	0	2396.29	0	0	0	0	0	0	0	0	0	0	0	0	0	0	0	0	0
HMF000128	HMF000128A	2811.02	1238.39	3133.75	932.695	0	0	0	0	0	0	0	0	1404.51	0	0	0	426.306	2291.64	0	0	0	152.083	0	0	0	0	0	0	0	0	0	0	0	0	0	0	0	0	0	0	0	0	0	0	0	0	0	0
HMF002330	HMF002330A	1369.23	1419.76	4593.96	15346.2	4112.2	0	0	0	0	0	0	0	0	0	0	0	2225.69	5226.8	0	0	0	1369.27	0	0	0	0	0	0	0	0	1598.86	0	0	0	0	0	0	0	0	0	0	0	0	0	0	0	0	0
HMF000350	HMF000350A	1972.68	602.552	743.854	0	414.822	0	0	0	0	0	0	0	1056.74	0	0	0	194.795	761.517	0	0	0	0	0	0	0	0	0	0	0	0	0	0	0	0	0	0	0	0	0	0	0	0	0	0	0	0	0	0
HMF001265	HMF001265A	1537.35	0	3886.92	0	1594.4	0	0	0	0	0	0	0	352.31	0	0	0	5654.48	1371.71	0	0	0	0	0	0	0	0	0	0	0	0	938.826	0	0	0	0	0	0	0	0	0	0	0	0	0	0	0	0	0
HMF002689	HMF002689A	0	4054.09	0	100516	13465.4	0	0	0	0	0	0	0	5442.29	0	0	0	0	7423.57	0	0	0	6009.46	0	0	0	0	0	0	0	0	5983.87	0	0	0	0	0	0	0	0	0	0	0	0	0	0	0	0	0
HMF001359	HMF001359A	1744.17	2230.43	7299.01	13125.5	12687.4	0	0	0	0	0	0	0	974.034	0	0	0	1452.8	7055.12	0	0	0	288.038	0	0	0	0	0	0	0	0	5386.42	0	0	0	0	0	0	0	0	0	0	0	0	0	0	0	0	0
HMF002955	HMF002955A	1240.02	3902.77	10330.1	39289	15090.5	0	0	0	0	0	0	0	1290.58	0	0	0	0	2899.55	0	0	0	2109.61	0	0	0	0	0	0	0	0	5493.72	0	0	0	0	0	0	0	0	0	0	0	0	0	0	0	0	0
HMF000127	HMF000127A	2117.85	2111.85	14017.5	23680.6	14216	0	0	0	0	0	0	0	3629.74	0	0	0	1488.39	7836.44	0	0	0	2363.56	0	0	0	0	0	0	0	0	5972.08	0	0	0	0	0	0	0	0	0	0	0	0	0	0	0	0	0
HMF001848	HMF001848A	2762.91	833.123	502.574	1676.51	1077.16	0	0	0	0	0	0	0	986.146	0	0	0	345.051	1500.22	0	0	0	168.262	0	0	0	0	0	0	0	0	304.045	0	0	0	0	0	0	0	0	0	0	0	0	0	0	0	0	0
HMF002842	HMF002842A	1288.07	3948.2	0	14286.6	3560.68	0	0	0	0	0	0	0	7977.91	0	0	0	1073.06	3577.18	0	0	0	1284.21	0	0	0	0	0	0	0	0	1766.09	0	0	0	0	0	0	0	0	0	0	0	0	0	0	0	0	0
HMF003622	HMF003622A	1184.31	1277.64	3477.58	12897.3	3146.69	0	0	0	0	0	0	0	2728.47	0	0	0	1062.04	4338.99	0	0	0	1063.47	0	0	0	0	0	0	0	0	1614.52	0	0	0	0	0	0	0	0	0	0	0	0	0	0	0	0	0
HMF002323	HMF002323A	1350.65	950.682	1876.74	3289.03	5491.04	0	0	0	0	0	0	0	0	0	0	0	441.675	2822.4	0	0	0	180.059	0	0	0	0	0	0	0	0	1770.72	0	0	0	0	0	0	0	0	0	0	0	0	0	0	0	0	0
HMF000262	HMF000262A	3230.87	640.253	1128.47	346.861	349.229	0	0	0	0	0	0	0	440.55	0	0	0	372.31	1000.02	0	0	0	56.5585	0	0	0	0	0	0	0	0	248.876	0	0	0	0	0	0	0	0	0	0	0	0	0	0	0	0	0
HMF001958	HMF001958A	2134.68	3800.04	30852.1	80017.9	0	0	0	0	0	0	0	0	0	0	0	0	2141.17	7318.68	0	0	0	5011.33	0	0	0	0	0	0	0	0	3539.14	0	0	0	0	0	0	0	0	0	0	0	0	0	0	0	0	0
HMF003327	HMF003327A	2459.54	1410.33	884.212	0	412.766	0	0	0	0	0	0	0	3274.04	0	0	0	1622.98	1033.67	0	0	0	0	0	0	0	0	0	0	0	0	261.301	0	0	0	0	0	0	0	0	0	0	0	0	0	0	0	0	0
HMF002512	HMF002512A	2553.64	2994.5	5924.01	30595.6	8256.23	0	0	0	0	0	0	0	988.669	0	0	0	761.245	4833.38	0	0	0	2372.4	0	0	0	0	0	0	0	0	3385.37	0	0	0	0	0	0	0	0	0	0	0	0	0	0	0	0	0
HMF003441	HMF003441A	2066.84	609.215	3255.31	0	1153.01	0	0	0	0	0	0	0	493.364	0	0	0	643.671	2410.39	0	0	0	0	0	0	0	0	0	0	0	0	792.978	0	0	0	0	0	0	0	0	0	0	0	0	0	0	0	0	0
HMF002779	HMF002779A	2122.65	831.408	593.719	342.764	0	0	0	0	0	0	0	0	381.605	0	0	0	160.966	0	0	0	0	55.8904	0	0	0	0	0	0	0	0	0	0	0	0	0	0	0	0	0	0	0	0	0	0	0	0	0	0
HMF002911	HMF002911A	864.153	3211.43	635.98	0	0	0	0	0	0	0	0	0	3885.93	0	0	0	654.494	0	0	0	0	0	0	0	0	0	0	0	0	0	0	0	0	0	0	0	0	0	0	0	0	0	0	0	0	0	0	0
HMF003604	HMF003604A	0	11562	9141.08	259528	24809.8	0	0	0	0	0	0	0	28921	0	0	0	0	16051.8	0	0	0	15585.7	0	0	0	0	0	0	0	0	13016.7	0	0	0	0	0	0	0	0	0	0	0	0	0	0	0	0	0
HMF001358	HMF001358A	2168.37	279.083	582.087	356.827	0	0	0	0	0	0	0	0	0	0	0	0	335.398	1606.72	0	0	0	0	0	0	0	0	0	0	0	0	0	0	0	0	0	0	0	0	0	0	0	0	0	0	0	0	0	0
HMF002939	HMF002939A	0	6332.05	7273.61	28219.7	25110.3	0	0	0	0	0	0	0	5397.98	0	0	0	1772.17	12322.3	0	0	0	2870.26	0	0	0	0	0	0	0	0	8178.69	0	0	0	0	0	0	0	0	0	0	0	0	0	0	0	0	0
HMF002047	HMF002047A	2250.31	994.252	2352.73	19911.5	2184.36	0	0	0	0	0	0	0	539.094	0	0	0	964.774	6129.39	0	0	0	1065.19	0	0	0	0	0	0	0	0	1493.38	0	0	0	0	0	0	0	0	0	0	0	0	0	0	0	0	0
HMF000028	HMF000028A	2254.98	637.616	852.83	1705.06	0	0	0	0	0	0	0	0	848.817	0	0	0	425.412	1925.39	0	0	0	278.023	0	0	0	0	0	0	0	0	0	0	0	0	0	0	0	0	0	0	0	0	0	0	0	0	0	0
HMF002944	HMF002944A	2774.36	3963.16	6233.45	5630.73	11526.7	0	0	0	0	0	0	0	1261.16	0	0	0	912.31	4856.5	0	0	0	918.136	0	0	0	0	0	0	0	0	3225.53	0	0	0	0	0	0	0	0	0	0	0	0	0	0	0	0	0
HMF000289	HMF000289A	1210.64	2401.75	4543.04	9634.49	8333.75	0	0	0	0	0	0	0	0	0	0	0	456.809	2617.63	0	0	0	637.696	0	0	0	0	0	0	0	0	2650.19	0	0	0	0	0	0	0	0	0	0	0	0	0	0	0	0	0
HMF003643	HMF003643A	3569.89	610.057	0	499.037	0	0	0	0	0	0	0	0	211.56	0	0	0	279.4	1180.92	0	0	0	81.3719	0	0	0	0	0	0	0	0	0	0	0	0	0	0	0	0	0	0	0	0	0	0	0	0	0	0
HMF000071	HMF000071A	1351.69	1402.62	3165.26	6209.38	6059.87	0	0	0	0	0	0	0	562.745	0	0	0	399.964	4356.16	0	0	0	183.553	0	0	0	0	0	0	0	0	2412.76	0	0	0	0	0	0	0	0	0	0	0	0	0	0	0	0	0
HMF002157	HMF002157A	0	7491.47	6595.73	112858	16150.2	0	0	0	0	0	0	0	7364.94	0	0	0	0	13577.6	0	0	0	7007.45	0	0	0	0	0	0	0	0	7382.44	0	0	0	0	0	0	0	0	0	0	0	0	0	0	0	0	0
HMF003644	HMF003644A	1025.03	1386.07	0	27755.3	2280.4	0	0	0	0	0	0	0	0	0	0	0	2774.64	5005.47	0	0	0	1762.74	0	0	0	0	0	0	0	0	2234.33	0	0	0	0	0	0	0	0	0	0	0	0	0	0	0	0	0
HMF000018	HMF000018A	0	3401.6	13317.6	20805.1	17395.3	0	0	0	0	0	0	0	0	0	0	0	2540.31	12465.4	0	0	0	1531.23	0	0	0	0	0	0	0	0	5598.1	0	0	0	0	0	0	0	0	0	0	0	0	0	0	0	0	0
HMF002345	HMF002345A	1084.68	0	0	0	0	0	0	0	0	0	0	0	0	0	0	0	45.5747	159.512	0	0	0	0	0	0	0	0	0	0	0	0	0	0	0	0	0	0	0	0	0	0	0	0	0	0	0	0	0	0
HMF001919	HMF001919A	747.316	3345.92	1099.47	17784.5	2204.43	0	0	0	0	0	0	0	4845.05	0	0	0	0	4120.24	0	0	0	982.921	0	0	0	0	0	0	0	0	1231.02	0	0	0	0	0	0	0	0	0	0	0	0	0	0	0	0	0
HMF000505	HMF000505A	1430.2	1381.23	0	46532.2	7170.01	0	0	0	0	0	0	0	3946.8	0	0	0	0	8977.01	0	0	0	2679.93	0	0	0	0	0	0	0	0	3597	0	0	0	0	0	0	0	0	0	0	0	0	0	0	0	0	0
HMF000520	HMF000520A	4840.27	1649.14	2034.14	0	0	0	0	0	0	0	0	0	12556.3	0	0	0	675.876	2011.11	0	0	0	0	0	0	0	0	0	0	0	0	425.051	0	0	0	0	0	0	0	0	0	0	0	0	0	0	0	0	0
HMF004382	HMF004382A	2693.71	2556.96	3793.26	3754.96	2003.44	0	0	0	0	0	0	0	7577.04	0	0	0	579.47	3662.99	0	0	0	612.277	0	0	0	0	0	0	0	0	1279.23	0	0	0	0	0	0	0	0	0	0	0	0	0	0	0	0	0
HMF000690	HMF000690B	1991.28	1331.19	946.634	2668.96	5957.34	0	0	0	0	0	0	0	0	0	0	0	402.057	2030.29	0	0	0	222.946	0	0	0	0	0	0	0	0	1984.78	0	0	0	0	0	0	0	0	0	0	0	0	0	0	0	0	0
HMF003328	HMF003328A	2977.41	8528.14	1730.56	1695.89	1685	0	0	0	0	0	0	0	9680.34	0	0	0	872.793	2669.96	0	0	0	276.529	0	0	0	0	0	0	0	0	931.38	0	0	0	0	0	0	0	0	0	0	0	0	0	0	0	0	0
HMF003024	HMF003024A	0	5036.86	3329.74	32324.5	4238.3	0	0	0	0	0	0	0	2370.17	0	0	0	7035	5273.37	0	0	0	1963.96	0	0	0	0	0	0	0	0	2007.14	0	0	0	0	0	0	0	0	0	0	0	0	0	0	0	0	0
HMF001050	HMF001050A	2547.78	1258.85	0	1252.63	714.903	0	0	0	0	0	0	0	0	0	0	0	355.948	6695.33	0	0	0	204.251	0	0	0	0	0	0	0	0	491.308	0	0	0	0	0	0	0	0	0	0	0	0	0	0	0	0	0
HMF000593	HMF000593A	0	5188.2	11535.2	26329.4	19174.9	0	0	0	0	0	0	0	7654.19	0	0	0	2869.57	14064.1	0	0	0	1573.58	0	0	0	0	0	0	0	0	6938.42	0	0	0	0	0	0	0	0	0	0	0	0	0	0	0	0	0
HMF004202	HMF004202A	4930.16	2405.54	3924.52	790.666	1934.74	0	0	0	0	0	0	0	2176.4	0	0	0	3652.34	3600.31	0	0	0	128.924	0	0	0	0	0	0	0	0	621.399	0	0	0	0	0	0	0	0	0	0	0	0	0	0	0	0	0
HMF001567	HMF001567A	5147.73	3131.24	1247.08	0	0	0	0	0	0	0	0	0	9364.15	0	0	0	375.428	1893.68	0	0	0	0	0	0	0	0	0	0	0	0	0	0	0	0	0	0	0	0	0	0	0	0	0	0	0	0	0	0
HMF001245	HMF001245A	2005.87	6354.11	0	0	0	0	0	0	0	0	0	0	2034.04	0	0	0	376.73	440.608	0	0	0	0	0	0	0	0	0	0	0	0	0	0	0	0	0	0	0	0	0	0	0	0	0	0	0	0	0	0
HMF002191	HMF002191A	2506.35	2818.9	0	55893.6	7950.12	0	0	0	0	0	0	0	1881.27	0	0	0	1862.76	12251.2	0	0	0	3602.82	0	0	0	0	0	0	0	0	3497.99	0	0	0	0	0	0	0	0	0	0	0	0	0	0	0	0	0
HMF002165	HMF002165A	3146.66	5909.55	3093.19	14135.1	6324.81	0	0	0	0	0	0	0	1421.17	0	0	0	903.472	5724.66	0	0	0	1235.89	0	0	0	0	0	0	0	0	5191.47	0	0	0	0	0	0	0	0	0	0	0	0	0	0	0	0	0
HMF003129	HMF003129A	974.876	3828.48	5180.5	9169.77	4161.6	0	0	0	0	0	0	0	6742.1	0	0	0	1152.44	3480.34	0	0	0	1078.19	0	0	0	0	0	0	0	0	1835.71	0	0	0	0	0	0	0	0	0	0	0	0	0	0	0	0	0
HMF001557	HMF001557A	1796.38	1705.31	7609.87	10979.4	4022.6	0	0	0	0	0	0	0	0	0	0	0	809.624	1748.85	0	0	0	759.686	0	0	0	0	0	0	0	0	1640.26	0	0	0	0	0	0	0	0	0	0	0	0	0	0	0	0	0
HMF000307	HMF000307C	1384.46	775.94	968.922	0	0	0	0	0	0	0	0	0	2239.1	0	0	0	1466.67	1786.47	0	0	0	0	0	0	0	0	0	0	0	0	0	0	0	0	0	0	0	0	0	0	0	0	0	0	0	0	0	0
HMF002668	HMF002668A	2979.74	284.213	765.075	261.146	789.093	0	0	0	0	0	0	0	0	0	0	0	182.137	310.733	0	0	0	42.582	0	0	0	0	0	0	0	0	371.779	0	0	0	0	0	0	0	0	0	0	0	0	0	0	0	0	0
HMF001792	HMF001792A	882.112	1093.78	0	32199.9	2206.53	0	0	0	0	0	0	0	1138.71	0	0	0	0	3754.09	0	0	0	1853.02	0	0	0	0	0	0	0	0	1420.76	0	0	0	0	0	0	0	0	0	0	0	0	0	0	0	0	0
HMF001091	HMF001091A	990.144	1259.5	1349.29	19005.9	2439.2	0	0	0	0	0	0	0	946.748	0	0	0	5621.13	5180.67	0	0	0	1191.58	0	0	0	0	0	0	0	0	1106.87	0	0	0	0	0	0	0	0	0	0	0	0	0	0	0	0	0
HMF002500	HMF002500A	3690.87	1683.17	2817.78	15483.7	12461.8	0	0	0	0	0	0	0	811.582	0	0	0	533.054	2416.24	0	0	0	678.905	0	0	0	0	0	0	0	0	4139.92	0	0	0	0	0	0	0	0	0	0	0	0	0	0	0	0	0
HMF001737	HMF001737A	5001.7	0	2773.29	0	861.95	0	0	0	0	0	0	0	897.844	0	0	0	1444.73	2123.22	0	0	0	0	0	0	0	0	0	0	0	0	755.265	0	0	0	0	0	0	0	0	0	0	0	0	0	0	0	0	0
HMF001313	HMF001313A	905.893	2937.5	0	0	0	0	0	0	0	0	0	0	1686.82	0	0	0	176.662	300.124	0	0	0	0	0	0	0	0	0	0	0	0	0	0	0	0	0	0	0	0	0	0	0	0	0	0	0	0	0	0
HMF002264	HMF002264A	2354.26	812.059	0	130.425	219.448	0	0	0	0	0	0	0	0	0	0	0	118.32	158.266	0	0	0	21.2669	0	0	0	0	0	0	0	0	128.938	0	0	0	0	0	0	0	0	0	0	0	0	0	0	0	0	0
HMF002425	HMF002425A	0	1008.45	0	47761.4	2527.62	0	0	0	0	0	0	0	2921.41	0	0	0	0	4221.7	0	0	0	2228.35	0	0	0	0	0	0	0	0	1806.51	0	0	0	0	0	0	0	0	0	0	0	0	0	0	0	0	0
HMF000340	HMF000340A	0	5658.69	0	82627.2	8933.01	0	0	0	0	0	0	0	8461.03	0	0	0	4013.78	6422.15	0	0	0	4973.94	0	0	0	0	0	0	0	0	4462.75	0	0	0	0	0	0	0	0	0	0	0	0	0	0	0	0	0
HMF004399	HMF004399A	1664.32	657.707	1825.24	4178.87	1592.13	0	0	0	0	0	0	0	0	0	0	0	440.644	2606.77	0	0	0	529.85	0	0	0	0	0	0	0	0	757.466	0	0	0	0	0	0	0	0	0	0	0	0	0	0	0	0	0
HMF001676	HMF001676A	2273.44	399.226	1969.15	543.451	593.092	0	0	0	0	0	0	0	0	0	0	0	592.093	2589.72	0	0	0	88.6141	0	0	0	0	0	0	0	0	313.784	0	0	0	0	0	0	0	0	0	0	0	0	0	0	0	0	0
HMF004359	HMF004359A	0	9396.63	30269.5	100226	36009.1	0	0	0	0	0	0	0	0	0	0	0	2719.26	19103.3	0	0	0	9277.58	0	0	0	0	0	0	0	0	11086.1	0	0	0	0	0	0	0	0	0	0	0	0	0	0	0	0	0
HMF004226	HMF004226A	743.015	2879.62	1040.82	26998.9	5692.28	0	0	0	0	0	0	0	911.405	0	0	0	6724.11	5452.94	0	0	0	1934.73	0	0	0	0	0	0	0	0	2738.21	0	0	0	0	0	0	0	0	0	0	0	0	0	0	0	0	0
HMF004279	HMF004279A	1222.41	1655.99	4067.38	7188.25	7202.74	0	0	0	0	0	0	0	0	0	0	0	602.224	4963.98	0	0	0	818.282	0	0	0	0	0	0	0	0	2497.71	0	0	0	0	0	0	0	0	0	0	0	0	0	0	0	0	0
HMF004219	HMF004219A	6148.92	1310.62	2758.95	1052.38	0	0	0	0	0	0	0	0	1953.15	0	0	0	432.698	2010.74	0	0	0	171.598	0	0	0	0	0	0	0	0	0	0	0	0	0	0	0	0	0	0	0	0	0	0	0	0	0	0
HMF004137	HMF004137B	2561.21	351.008	1363.47	486.062	0	0	0	0	0	0	0	0	2487.6	0	0	0	286.916	1110.61	0	0	0	79.2564	0	0	0	0	0	0	0	0	0	0	0	0	0	0	0	0	0	0	0	0	0	0	0	0	0	0
HMF004134	HMF004134A	0	10895.6	0	544.356	613.098	0	0	0	0	0	0	0	5824.18	0	0	0	15994.6	1795.25	0	0	0	88.7616	0	0	0	0	0	0	0	0	647.131	0	0	0	0	0	0	0	0	0	0	0	0	0	0	0	0	0
HMF004122	HMF004122A	2448.82	861.64	3204.38	4400.84	2624.45	0	0	0	0	0	0	0	0	0	0	0	874.149	2702.51	0	0	0	388.215	0	0	0	0	0	0	0	0	1164.86	0	0	0	0	0	0	0	0	0	0	0	0	0	0	0	0	0
HMF004369	HMF004369A	5963.46	841.765	2945.93	1825.52	0	0	0	0	0	0	0	0	1354.54	0	0	0	842.266	828.746	0	0	0	297.666	0	0	0	0	0	0	0	0	0	0	0	0	0	0	0	0	0	0	0	0	0	0	0	0	0	0
HMF003916	HMF003916A	1289.21	758.004	0	13790.3	1560.57	0	0	0	0	0	0	0	0	0	0	0	0	2685.06	0	0	0	770.987	0	0	0	0	0	0	0	0	893.183	0	0	0	0	0	0	0	0	0	0	0	0	0	0	0	0	0
HMF004370	HMF004370A	3261.89	9266.19	1379.97	513.06	0	0	0	0	0	0	0	0	7355.68	0	0	0	550.084	1814.73	0	0	0	83.6585	0	0	0	0	0	0	0	0	5578.06	0	0	0	0	0	0	0	0	0	0	0	0	0	0	0	0	0
HMF003880	HMF003880B	506.385	0	184.887	0	103.229	0	0	0	0	0	0	0	0	0	0	0	0	0	0	0	0	0	0	0	0	0	0	0	0	0	0	0	0	0	0	0	0	0	0	0	0	0	0	0	0	0	0	0
HMF003827	HMF003827B	1862.87	433.119	289.588	457.883	417.957	0	0	0	0	0	0	0	0	0	0	0	175.37	1008.25	0	0	0	0	0	0	0	0	0	0	0	0	0	0	0	0	0	0	0	0	0	0	0	0	0	0	0	0	0	0
HMF003844	HMF003844A	3381.21	401.306	1029.63	0	521.848	0	0	0	0	0	0	0	768.96	0	0	0	232.546	914.113	0	0	0	0	0	0	0	0	0	0	0	0	224.51	0	0	0	0	0	0	0	0	0	0	0	0	0	0	0	0	0
HMF004336	HMF004336A	2201.42	1658.8	0	7989.33	852.115	0	0	0	0	0	0	0	1544.99	0	0	0	368.401	1301.38	0	0	0	313.673	0	0	0	0	0	0	0	0	434.294	0	0	0	0	0	0	0	0	0	0	0	0	0	0	0	0	0
HMF004190	HMF004190A	1485.78	1864.98	1513.8	4350.6	3851.53	0	0	0	0	0	0	0	4366.8	0	0	0	255.135	1338.21	0	0	0	449.43	0	0	0	0	0	0	0	0	1366.72	0	0	0	0	0	0	0	0	0	0	0	0	0	0	0	0	0
HMF004058	HMF004058A	1608.23	2351.88	1326.72	1414.54	0	0	0	0	0	0	0	0	6192.55	0	0	0	3942.54	1364.36	0	0	0	0	0	0	0	0	0	0	0	0	678.416	0	0	0	0	0	0	0	0	0	0	0	0	0	0	0	0	0
HMF004149	HMF004149A	36026.6	0	0	3520.43	1634.69	0	0	0	0	0	0	0	2150.43	0	0	0	4647.69	0	0	0	0	574.034	0	0	0	0	0	0	0	0	7244.39	0	0	0	0	0	0	0	0	0	0	0	0	0	0	0	0	0
HMF004159	HMF004159A	2218.34	1954.05	0	1958.81	0	0	0	0	0	0	0	0	3219.23	0	0	0	257.257	2588.14	0	0	0	145.465	0	0	0	0	0	0	0	0	0	0	0	0	0	0	0	0	0	0	0	0	0	0	0	0	0	0
HMF004320	HMF004320A	0	34656	6035.61	39890.7	14319.2	0	0	0	0	0	0	0	0	0	0	0	10466.1	8229.1	0	0	0	3916.22	0	0	0	0	0	0	0	0	5916.13	0	0	0	0	0	0	0	0	0	0	0	0	0	0	0	0	0
HMF003966	HMF003966A	2775.17	758.552	1075.33	15508.4	3309.32	0	0	0	0	0	0	0	1972.44	0	0	0	2041.72	3540.24	0	0	0	1225.91	0	0	0	0	0	0	0	0	1344.91	0	0	0	0	0	0	0	0	0	0	0	0	0	0	0	0	0
HMF004139	HMF004139A	1834.4	3236.17	6295.5	27535.5	9521.18	0	0	0	0	0	0	0	3233.18	0	0	0	4254.28	5200.46	0	0	0	2085.09	0	0	0	0	0	0	0	0	3206.2	0	0	0	0	0	0	0	0	0	0	0	0	0	0	0	0	0
HMF003859	HMF003859A	4129.78	580.875	3948.35	0	1935.08	0	0	0	0	0	0	0	454.075	0	0	0	847.006	2609.18	0	0	0	0	0	0	0	0	0	0	0	0	1121.66	0	0	0	0	0	0	0	0	0	0	0	0	0	0	0	0	0
HMF004275	HMF004275A	2633.62	7044.35	0	2879.96	0	0	0	0	0	0	0	0	7259.98	0	0	0	1794.61	3688.78	0	0	0	239.465	0	0	0	0	0	0	0	0	935.577	0	0	0	0	0	0	0	0	0	0	0	0	0	0	0	0	0
HMF004247	HMF004247A	2254.71	1099.89	903.297	246.606	794.922	0	0	0	0	0	0	0	249.516	0	0	0	209.694	437.031	0	0	0	40.2111	0	0	0	0	0	0	0	0	0	0	0	0	0	0	0	0	0	0	0	0	0	0	0	0	0	0
HMF003813	HMF003813A	3773.45	829.5	627.244	1151.63	0	0	0	0	0	0	0	0	496.901	0	0	0	376.047	2822.6	0	0	0	76.3857	0	0	0	0	0	0	0	0	0	0	0	0	0	0	0	0	0	0	0	0	0	0	0	0	0	0
HMF004344	HMF004344A	1850.04	1275.84	1001.98	0	936.016	0	0	0	0	0	0	0	2564.17	0	0	0	461.261	2971.46	0	0	0	0	0	0	0	0	0	0	0	0	533.224	0	0	0	0	0	0	0	0	0	0	0	0	0	0	0	0	0
HMF004008	HMF004008A	1638.01	4874.04	2848.53	21125.4	4640.04	0	0	0	0	0	0	0	10381.6	0	0	0	0	6433.06	0	0	0	1952.83	0	0	0	0	0	0	0	0	2369.02	0	0	0	0	0	0	0	0	0	0	0	0	0	0	0	0	0
HMF004103	HMF004103A	2085.9	4645.71	1340.83	902.956	0	0	0	0	0	0	0	0	4449.45	0	0	0	407.991	2058.93	0	0	0	147.234	0	0	0	0	0	0	0	0	0	0	0	0	0	0	0	0	0	0	0	0	0	0	0	0	0	0
HMF003952	HMF003952A	2529.59	1220.84	0	257.02	0	0	0	0	0	0	0	0	761.139	0	0	0	238.641	1565.49	0	0	0	41.9092	0	0	0	0	0	0	0	0	0	0	0	0	0	0	0	0	0	0	0	0	0	0	0	0	0	0
HMF004153	HMF004153A	3478.38	1338.07	0	10545.1	1661.57	0	0	0	0	0	0	0	1041.11	0	0	0	0	2065.2	0	0	0	679.748	0	0	0	0	0	0	0	0	840.3	0	0	0	0	0	0	0	0	0	0	0	0	0	0	0	0	0
HMF004299	HMF004299A	2185	354.569	0	140.704	364.166	0	0	0	0	0	0	0	0	0	0	0	97.4814	177.79	0	0	0	22.943	0	0	0	0	0	0	0	0	0	0	0	0	0	0	0	0	0	0	0	0	0	0	0	0	0	0
HMF003920	HMF003920A	3345.93	3469.95	0	55446.2	5652.23	0	0	0	0	0	0	0	1884.74	0	0	0	0	5055.15	0	0	0	3417.34	0	0	0	0	0	0	0	0	2887.37	0	0	0	0	0	0	0	0	0	0	0	0	0	0	0	0	0
HMF004273	HMF004273A	2004.59	0	188.596	159.976	0	0	0	0	0	0	0	0	0	0	0	0	113.563	156.149	0	0	0	26.0853	0	0	0	0	0	0	0	0	134.856	0	0	0	0	0	0	0	0	0	0	0	0	0	0	0	0	0
HMF003982	HMF003982A	2168.83	919.99	4291.12	6240.19	5418.33	0	0	0	0	0	0	0	4697.05	0	0	0	506.545	3462.23	0	0	0	503.571	0	0	0	0	0	0	0	0	2459.15	0	0	0	0	0	0	0	0	0	0	0	0	0	0	0	0	0
HMF004022	HMF004022A	1338.12	2144.2	4652.61	5395.97	5587.44	0	0	0	0	0	0	0	5506.78	0	0	0	837.64	3603.55	0	0	0	206.495	0	0	0	0	0	0	0	0	2145.2	0	0	0	0	0	0	0	0	0	0	0	0	0	0	0	0	0
HMF004177	HMF004177B	1357.23	1702.3	0	27991.9	4438.79	0	0	0	0	0	0	0	1223.01	0	0	0	807.327	5968.81	0	0	0	1256.69	0	0	0	0	0	0	0	0	2106.96	0	0	0	0	0	0	0	0	0	0	0	0	0	0	0	0	0
HMF004102	HMF004102A	1618.65	3209.35	6720.76	29165.7	16815.6	0	0	0	0	0	0	0	1227.22	0	0	0	1093.41	10442.9	0	0	0	1280.18	0	0	0	0	0	0	0	0	6024.27	0	0	0	0	0	0	0	0	0	0	0	0	0	0	0	0	0
HMF004133	HMF004133A	4179.13	864.25	1205.23	554.399	0	0	0	0	0	0	0	0	1706.91	0	0	0	453.468	2309.52	0	0	0	90.3991	0	0	0	0	0	0	0	0	0	0	0	0	0	0	0	0	0	0	0	0	0	0	0	0	0	0
HMF004168	HMF004168A	3881.4	207.008	260.77	197.858	0	0	0	0	0	0	0	0	846.121	0	0	0	279.863	364.777	0	0	0	32.2624	0	0	0	0	0	0	0	0	0	0	0	0	0	0	0	0	0	0	0	0	0	0	0	0	0	0
HMF004195	HMF004195A	1899.31	1201.41	3860.74	9488.77	5805.64	0	0	0	0	0	0	0	939.383	0	0	0	458.419	3920.36	0	0	0	481.212	0	0	0	0	0	0	0	0	2624.76	0	0	0	0	0	0	0	0	0	0	0	0	0	0	0	0	0
HMF004319	HMF004319A	1791.38	4845.95	0	0	0	0	0	0	0	0	0	0	2664.54	0	0	0	13467.4	2420.22	0	0	0	0	0	0	0	0	0	0	0	0	510.679	0	0	0	0	0	0	0	0	0	0	0	0	0	0	0	0	0
HMF004282	HMF004282A	3167.35	1092.05	1861.2	8477.74	1307.65	0	0	0	0	0	0	0	1532.28	0	0	0	1238.46	2652.41	0	0	0	497.339	0	0	0	0	0	0	0	0	1075.51	0	0	0	0	0	0	0	0	0	0	0	0	0	0	0	0	0
HMF003913	HMF003913A	1198.67	678.614	0	1985.12	2831.13	0	0	0	0	0	0	0	0	0	0	0	141.606	1142.82	0	0	0	112.546	0	0	0	0	0	0	0	0	1125.37	0	0	0	0	0	0	0	0	0	0	0	0	0	0	0	0	0
HMF003889	HMF003889A	1219.11	1706.15	1503.13	36443.5	4961.43	0	0	0	0	0	0	0	1506.63	0	0	0	744.065	4908.93	0	0	0	1786.83	0	0	0	0	0	0	0	0	2687.23	0	0	0	0	0	0	0	0	0	0	0	0	0	0	0	0	0
HMF003600	HMF003600A	1342.7	3409.98	1676.01	3651.17	5050	0	0	0	0	0	0	0	4397.39	0	0	0	291.327	983.416	0	0	0	153.075	0	0	0	0	0	0	0	0	1795.93	0	0	0	0	0	0	0	0	0	0	0	0	0	0	0	0	0
HMF002778	HMF002778A	784.267	879.556	0	24326.8	2555.85	0	0	0	0	0	0	0	817.194	0	0	0	0	2998.37	0	0	0	1536.05	0	0	0	0	0	0	0	0	1535.61	0	0	0	0	0	0	0	0	0	0	0	0	0	0	0	0	0
HMF001179	HMF001179A	45381.6	0	0	1987.75	0	0	0	0	0	0	0	0	0	0	0	0	3027.67	0	0	0	0	324.119	0	0	0	0	0	0	0	0	4219.85	0	0	0	0	0	0	0	0	0	0	0	0	0	0	0	0	0
HMF002077	HMF002077A	0	5652.51	1412.38	36466.6	12529.5	0	0	0	0	0	0	0	2787.77	0	0	0	1235.96	7490.7	0	0	0	3443.35	0	0	0	0	0	0	0	0	4034.72	0	0	0	0	0	0	0	0	0	0	0	0	0	0	0	0	0
HMF000009	HMF000009A	1446.93	3842.82	9110.58	18055.3	9685.56	0	0	0	0	0	0	0	37213.3	0	0	0	0	2102.9	0	0	0	968.371	0	0	0	0	0	0	0	0	4577.79	0	0	0	0	0	0	0	0	0	0	0	0	0	0	0	0	0
HMF002585	HMF002585A	1243.5	3394.83	0	0	0	0	0	0	0	0	0	0	5937.94	0	0	0	173.85	434.875	0	0	0	0	0	0	0	0	0	0	0	0	0	0	0	0	0	0	0	0	0	0	0	0	0	0	0	0	0	0
HMF002269	HMF002269A	1729.26	755.738	4269.2	13577.7	8425.01	0	0	0	0	0	0	0	7270.17	0	0	0	754.24	5431.53	0	0	0	448.671	0	0	0	0	0	0	0	0	3483.49	0	0	0	0	0	0	0	0	0	0	0	0	0	0	0	0	0
HMF003457	HMF003457A	2514.95	1655.81	2680.88	5856.1	1900.21	0	0	0	0	0	0	0	0	0	0	0	1211.99	3313.12	0	0	0	566.723	0	0	0	0	0	0	0	0	694.211	0	0	0	0	0	0	0	0	0	0	0	0	0	0	0	0	0
HMF001629	HMF001629A	2215.65	1922.47	1632.8	5961.15	9588.79	0	0	0	0	0	0	0	1322.07	0	0	0	586.864	1959.56	0	0	0	113.473	0	0	0	0	0	0	0	0	4164.18	0	0	0	0	0	0	0	0	0	0	0	0	0	0	0	0	0
HMF003355	HMF003355A	1249.46	2540.92	3485.39	9404.04	8327.75	0	0	0	0	0	0	0	1265.46	0	0	0	455.986	3186.9	0	0	0	340.67	0	0	0	0	0	0	0	0	2860.41	0	0	0	0	0	0	0	0	0	0	0	0	0	0	0	0	0
HMF003603	HMF003603A	1335.27	1067.11	1236.03	2636.34	1851.03	0	0	0	0	0	0	0	3042.95	0	0	0	259.135	1824.47	0	0	0	224.164	0	0	0	0	0	0	0	0	610.495	0	0	0	0	0	0	0	0	0	0	0	0	0	0	0	0	0
HMF003553	HMF003553A	1834.89	1838.89	4110.11	16065.4	7246.48	0	0	0	0	0	0	0	19152	0	0	0	0	2898.69	0	0	0	565.144	0	0	0	0	0	0	0	0	5149.9	0	0	0	0	0	0	0	0	0	0	0	0	0	0	0	0	0
HMF002419	HMF002419A	2757.04	600.643	3485.54	1295.83	0	0	0	0	0	0	0	0	519.922	0	0	0	5993.4	2132.33	0	0	0	211.295	0	0	0	0	0	0	0	0	0	0	0	0	0	0	0	0	0	0	0	0	0	0	0	0	0	0
HMF002946	HMF002946A	0	7667	4213.17	40165.8	6989.75	0	0	0	0	0	0	0	5793.43	0	0	0	0	8184.08	0	0	0	2811.91	0	0	0	0	0	0	0	0	2779.58	0	0	0	0	0	0	0	0	0	0	0	0	0	0	0	0	0
HMF001482	HMF001482A	0	1617.81	0	45325.9	1530.77	0	0	0	0	0	0	0	1856.93	0	0	0	0	8512.78	0	0	0	2707.81	0	0	0	0	0	0	0	0	1798.4	0	0	0	0	0	0	0	0	0	0	0	0	0	0	0	0	0
HMF002829	HMF002829A	3289.83	2436.12	16405.2	26428.3	13272.4	0	0	0	0	0	0	0	3158.3	0	0	0	1755.44	8076.54	0	0	0	3089.2	0	0	0	0	0	0	0	0	5071.78	0	0	0	0	0	0	0	0	0	0	0	0	0	0	0	0	0
HMF002228	HMF002228A	0	2031.96	6814.06	16100.8	14815.9	0	0	0	0	0	0	0	0	0	0	0	1251.29	4846.11	0	0	0	1007.13	0	0	0	0	0	0	0	0	4755.09	0	0	0	0	0	0	0	0	0	0	0	0	0	0	0	0	0
HMF000519	HMF000519A	0	9617.15	22372.7	163841	19575.1	0	0	0	0	0	0	0	11924	0	0	0	3893.54	30132.8	0	0	0	10115.3	0	0	0	0	0	0	0	0	10916	0	0	0	0	0	0	0	0	0	0	0	0	0	0	0	0	0
HMF000976	HMF000976A	2042.88	638.589	1176.69	184.892	351.701	0	0	0	0	0	0	0	412.496	0	0	0	233.63	711.944	0	0	0	30.1481	0	0	0	0	0	0	0	0	0	0	0	0	0	0	0	0	0	0	0	0	0	0	0	0	0	0
HMF000815	HMF000815A	1356.75	2331.7	9346.8	53744.4	11340.7	0	0	0	0	0	0	0	1978.9	0	0	0	0	2677.01	0	0	0	6291.65	0	0	0	0	0	0	0	0	5469.96	0	0	0	0	0	0	0	0	0	0	0	0	0	0	0	0	0
HMF004310	HMF004310A	2184.81	269.885	588.703	0	416.178	0	0	0	0	0	0	0	0	0	0	0	127.124	205.315	0	0	0	0	0	0	0	0	0	0	0	0	0	0	0	0	0	0	0	0	0	0	0	0	0	0	0	0	0	0
HMF004281	HMF004281A	3571.86	693.943	6521.37	0	1328.81	0	0	0	0	0	0	0	4574.72	0	0	0	1763.4	6126.83	0	0	0	0	0	0	0	0	0	0	0	0	1533.08	0	0	0	0	0	0	0	0	0	0	0	0	0	0	0	0	0
HMF004243	HMF004243A	1497.5	630	2750	3255.83	854.5	0	0	0	0	0	0	0	1048.5	0	0	0	312	1491	0	0	0	292.172	0	0	0	0	0	0	0	0	635.5	0	0	0	0	0	0	0	0	0	0	0	0	0	0	0	0	0
HMF004304	HMF004304A	1454.24	4487.27	0	51156.8	5103.58	0	0	0	0	0	0	0	3643.34	0	0	0	0	8635.87	0	0	0	4203.71	0	0	0	0	0	0	0	0	2459.74	0	0	0	0	0	0	0	0	0	0	0	0	0	0	0	0	0
HMF003301	HMF003301A	0	2826.87	5859.01	31900.3	15403.4	0	0	0	0	0	0	0	0	0	0	0	0	7148.58	0	0	0	1392.3	0	0	0	0	0	0	0	0	5771.6	0	0	0	0	0	0	0	0	0	0	0	0	0	0	0	0	0
HMF001369	HMF001369A	1230.63	2179.69	4354.89	8808.79	10632.9	0	0	0	0	0	0	0	0	0	0	0	498.244	4794.73	0	0	0	451.662	0	0	0	0	0	0	0	0	3323.96	0	0	0	0	0	0	0	0	0	0	0	0	0	0	0	0	0
[truncated: 4,189 more rows]
[truncated: 38 more columns]

## Sheet: d
All SBS signatures, indels counts and SV counts, per sample, log-transformed and scaled to z-scores
[truncated: 6,066 more rows]
[truncated: 39 more columns]

## Sheet: e
SBS Signature	Proposed Eiology from Alexandrov Et Al.
[truncated: 43 more rows]

[truncated: 5 more sheets: f, g, h, i, j]
